# Supplementary material for: Room temperature catalytic carbon–hydrogen bond alumination of unactivated arenes: mechanism and selectivity
Source: PubMed Central journal article supplement (PMC6011207; doi:10.1039/c8sc02072h), 2018-05-29
Supplement: SC-009-C8SC02072H-s003.pdf [file SC-009-C8SC02072H-s003.pdf]

**Electronic Supplementary Information for:**

**Room Temperature Catalytic Carbon–Hydrogen Bond  
Alumination of Unactivated Arenes: Mechanism and  
Selectivity**

Thomas N. Hooper, Martí Garçon, Andrew J. P. White, Mark R. Crimmin\*

Department of Chemistry, Imperial College London, South Kensington, London, SW7 2AZ,  
UK.

## Table of contents

|   |                                      |        |
|---|--------------------------------------|--------|
| 1 | General Experimental                 | S - 3  |
| 2 | Experimental Results                 | S - 4  |
| 3 | X-ray Crystallographic Data          | S - 19 |
| 4 | Kinetics Studies by NMR Spectroscopy | S - 25 |
| 5 | Multinuclear NMR Data                | S - 28 |
| 6 | Computational Details                | S - 43 |

# **1. General Experimental, Preparation of Materials and Instruments**

## **1.1 Materials**

Aromatic compounds (benzene, toluene, xylenes) were purchased as anhydrous reagents (Sigma Aldrich or Acros) and further dried over 3 Å molecular sieves, degassed by the freeze-pump-thaw method (x 3) and stored under inert atmosphere stored with activated 3 Å molecular sieves. Dipp-BDIAIH<sub>2</sub> (**S1**), Mes-BDIAIH<sub>2</sub> (**1**), Dipp-BDIAI(I) (**2**) and Dipp-BDIAICl<sub>2</sub> were synthesised by the literature procedures (Ar-BDI = {(ArNCMe)<sub>2</sub>CH}<sup>-</sup>, Ar = 2,4,6-Me<sub>3</sub>C<sub>6</sub>H<sub>2</sub> (Mes) or 2,6-<sup>i</sup>Pr<sub>2</sub>C<sub>6</sub>H<sub>3</sub> (Dipp)).<sup>1</sup> [Pd(PCy<sub>3</sub>)<sub>2</sub>] was synthesised as an analytically pure pale brown crystalline solid from PdCl<sub>2</sub> in a 3 step procedure (via intermediates [Pd(η<sup>3</sup>-C<sub>3</sub>H<sub>4</sub>Ph)(μ-Cl)]<sub>2</sub> and [CpPd(η<sup>3</sup>-C<sub>3</sub>H<sub>4</sub>Ph)]) based on literature reactions.<sup>2</sup> All other reagents were purchased from common suppliers (Sigma-Aldrich, Merck, Alfa Aesar, TCI etc.) and used without further purification.

Solvents for air sensitive procedures (toluene, diethyl ether, *n*-hexane, *n*-heptane, cyclohexane) were dried using a solvent purification system (SPS) and stored over activated 3 Å molecular sieves under an inert atmosphere of N<sub>2</sub> or argon before use. C<sub>6</sub>H<sub>6</sub> (Sigma-Aldrich anhydrous grade) and C<sub>6</sub>D<sub>6</sub> were degassed by the freeze-pump-thaw method (x 3) and stored under inert atmosphere over activated 3 Å molecular sieves.

## **1.2 Instruments**

<sup>1</sup>H NMR, <sup>31</sup>P NMR and <sup>13</sup>C NMR spectra were recorded and analysed using Bruker 400 MHz Spectrometer at 298 K. Spectra were recorded in C<sub>6</sub>D<sub>6</sub> solvent unless otherwise stated. The reported values for <sup>1</sup>H, <sup>31</sup>P NMR and <sup>13</sup>C NMR data are as follows: chemical shifts (δ ppm), multiplicity (where s = singlet, d = doublet, t = triplet, m = multiplet), integration (not <sup>13</sup>C) and coupling constant, *J* (Hz).

---

<sup>1</sup> (a) S. Yow, S. J. Gates, A. J. P. White, M. R. Crimmin, *Angew. Chem. Int. Ed.*, 2012, **51**, 12559. (b) C. Cui, H.W. Roesky, H.-G. Schmidt, M. Noltemeyer, H. Hao and F. Cimpoesu, *Angew. Chem. Int. Ed.*, 2000, **39**, 4274. (c) M. Stender, B.E. Eichler, N.J. Hardman, P.P. Power, J. Prust, M. Noltemeyer and H.W. Roesky, *Inorg. Chem.*, 2001, **40**, 2794.

<sup>2</sup> (a) P. R. Auburn, P. B. Mackenzie, B. Bosnich, *J. Am. Chem. Soc.*, 1985, **107**, 2033. (b) S. D. Robinson, B. L. Shaw, *J. Chem. Soc.*, 1963, 4806. (c) T. Yoshida, S. Otsuka, *Inorg. Synth.*, 1990, **28**, 114.

## 2. Experimental Results

### 2.1 Synthesis of Heterometallic Products

#### 2.1.1 Synthesis of $[H\{Pd(PCy_3)\}(Mes-BDIAI)]_2$ ( $Pd_2Al_2$ )

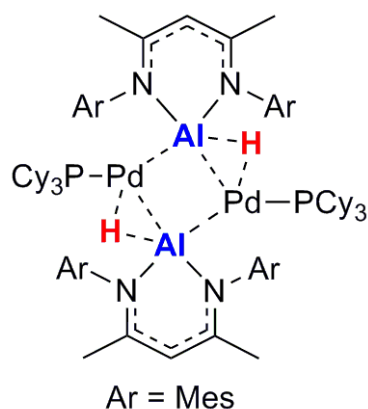

$[Pd(PCy_3)_2]$  (18.4 mg, 0.0276 mmol) and Mes-BDIAI $H_2$  (**1**, 10.0 mg, 0.0276 mmol) were dissolved in benzene (1 mL) to form a red solution which was left to stand at 25 °C in the glove box for 72 h. Red crystals of  $Pd_2Al_2$  formed and the mother liquor was decanted, the solid washed with benzene (3 x 1 mL) and dried *in vacuo* (6.8 mg, 33%). **Elemental analysis:** calc. for  $C_{82}H_{126}Al_2N_4P_2Pd_2$  – C 65.79%, H 8.49%, N 3.74%; found – C 65.90%, H 8.38%, N 3.89%. **FT-IR** (solid,  $cm^{-1}$ ): 2918, 2846, 1622, 1526, 1476, 1445, 1387, 1273, 1246, 1199, 1147, 1012,

859, 766, 731, 675.

Due to the insolubility of the isolated crystalline material of  $Pd_2Al_2$  in common organic solvents (benzene, toluene, fluorobenzene, 1,2-difluorobenzene, hexane, dichloromethane), solution phase analysis (e.g. NMR spectroscopy) of purified  $Pd_2Al_2$  was not possible. A  $^{31}P\{^1H\}$  NMR spectrum of the reaction mixture before precipitation of the  $Pd_2Al_2$  product in which a dynamic process involving  $[Pd(PCy_3)_2]$  and free  $PCy_3$  is shown in section 5.1.1 (figure S8).

#### 2.1.2 Synthesis of $[Pd(PCy_3)(Dipp-BDIAI)]_2$ ( $PdAl_2$ )

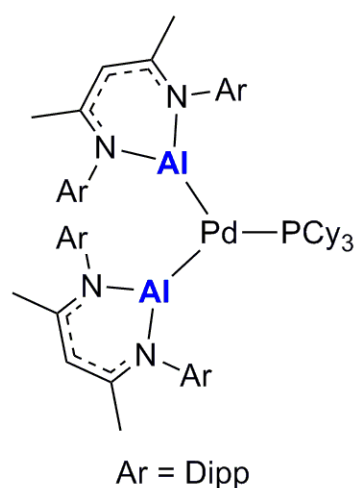

$[Pd(PCy_3)_2]$  (15.0 mg, 0.0225 mmol) and Dipp-BDIAI (**2**, 20.0 mg, 0.0450 mmol) were dissolved in cyclohexane (1 mL) and mixed thoroughly to form a dark green/black solution. The solvent was immediately removed *in vacuo*. The resulting black oily product was redissolved in a 1:1 mixture of *n*-hexane and *n*-heptane (1 mL) and stored at -35 °C. If no crystals formed after a few days the volume of solvent was reduced slightly *in vacuo* and stored at -35 °C again. This process was repeated until black crystals formed. The mother liquor was then decanted by pipette and the black crystals washed with cold (-35 °C) *n*-heptane (2 x 0.5 mL).

The black crystals were dried *in vacuo* (the isolated solid appeared to lose crystallinity upon drying, likely due to loss of *n*-hexane solvent of crystallisation), yield 19.2 mg (67%).

The  $^1\text{H}$  NMR spectrum of  $\text{PdAl}_2$  in  $d_8$ -toluene at 25 °C in section 5.1.2 (figure S9) showed broad peaks indicative of dynamic processes in solution. The  $^{31}\text{P}\{^1\text{H}\}$  NMR spectrum (figure S10) revealed a number of broad peaks including a peak at 9.8 ppm suggestive of free  $\text{PCy}_3$ . In addition,  $\text{PdAl}_2$  will decompose slowly in aromatic solvents to give the aluminated arene products. Cooling of this solution to -60 °C did result in a sharpening of the resonances but several resonances were still observed in the  $^{31}\text{P}\{^1\text{H}\}$  NMR spectrum. Addition of 1 equivalent of **2** to an NMR sample of  $\text{PdAl}_2$  resulted in perturbation of the equilibrium to give a single phosphorus containing Pd complex at -40 °C, (figure S11-S13). The  $^1\text{H}$  NMR data of this mixture of  $\text{PdAl}_2$  and **2** at -40 °C is given below in section 5.1.3, assigned using integrations, comparison to **2** and the COSY spectrum of the mixture. The  $^{13}\text{C}\{^1\text{H}\}$  (figure S13) and HMQC NMR spectra were also collected.

$^1\text{H}$  NMR (500 MHz,  $d_8$ -toluene, 233 K):  $\delta$  7.29 (apparent t,  $^3J_{\text{HH}} = 7.6$  Hz, 2H, Ar-H  $\text{PdAl}_2$ ), 7.21 (apparent t,  $^3J_{\text{HH}} = 8.4$  Hz, 2H, Ar-H  $\text{PdAl}_2$ ) 7.13-7.01 (m overlapping with residual solvent peaks, Ar-H  $\text{PdAl}_2$  and **2**), 5.16 (s, **2** C-H), 5.06 (s, 2H,  $\text{PdAl}_2$  C-H), 3.73 (sept,  $^3J_{\text{HH}} = 6.7$  Hz, 2H,  $\text{PdAl}_2$  - $\text{CMe}_2\text{H}$ ), 3.44 (sept,  $^3J_{\text{HH}} = 6.7$  Hz, 2H,  $\text{PdAl}_2$  - $\text{CMe}_2\text{H}$ ), 3.73 (sept,  $^3J_{\text{HH}} = 6.7$  Hz, 2H,  $\text{PdAl}_2$  - $\text{CMe}_2\text{H}$ ), 3.19 (overlapping sept,  $^3J_{\text{HH}} = 6.7$  Hz, 2H,  $\text{PdAl}_2$  - $\text{CMe}_2\text{H}$ ), 3.17 (overlapping sept,  $^3J_{\text{HH}} = 6.7$  Hz, **2** - $\text{CMe}_2\text{H}$ ), 2.83 (sept,  $^3J_{\text{HH}} = 6.7$  Hz, 2H,  $\text{PdAl}_2$  - $\text{CMe}_2\text{H}$ ), 1.93 (br d,  $J = 12.1$  Hz, 1H,  $\text{PdAl}_2$  Cy-H), 1.84-1.77 (br m, 8H,  $\text{PdAl}_2$  Cy-H), 1.73 (d,  $^3J_{\text{HH}} = 6.7$  Hz, 6H,  $\text{PdAl}_2$  Dipp- $\text{CH}_3$ ), 1.74-1.66 (overlapping br m,  $\text{PdAl}_2$  Cy-H), 1.65 (s, **2**  $\text{CH}_3$ ), 1.51 (d,  $^3J_{\text{HH}} = 6.7$  Hz, 6H,  $\text{PdAl}_2$  Dipp- $\text{CH}_3$ ), 1.48 (s, 6H,  $\text{PdAl}_2$   $\text{CH}_3$ ), 1.46 (overlapping d,  $^3J_{\text{HH}} = 6.7$  Hz, 6H,  $\text{PdAl}_2$  Dipp- $\text{CH}_3$ ), 1.44 (overlapping d,  $^3J_{\text{HH}} = 6.7$  Hz, **2** Dipp- $\text{CH}_3$ ), 1.42 (s, 6H,  $\text{PdAl}_2$   $\text{CH}_3$ ), 1.41 (overlapping d,  $^3J_{\text{HH}} = 6.7$  Hz, 6H,  $\text{PdAl}_2$  Dipp- $\text{CH}_3$ ), 1.27-1.25 (br m, 4H,  $\text{PdAl}_2$  Cy-H), 1.23 (d,  $^3J_{\text{HH}} = 6.7$  Hz, 6H,  $\text{PdAl}_2$  Dipp- $\text{CH}_3$ ), 1.17 (overlapping d,  $^3J_{\text{HH}} = 6.7$  Hz, **2** Dipp- $\text{CH}_3$ ), 1.16 (overlapping d,  $^3J_{\text{HH}} = 6.7$  Hz, 6H,  $\text{PdAl}_2$  Dipp- $\text{CH}_3$ ), 1.14 (d,  $^3J_{\text{HH}} = 6.7$  Hz, 6H,  $\text{PdAl}_2$  Dipp- $\text{CH}_3$ ), 1.01-0.93 (overlapping br m,  $\text{PdAl}_2$  Cy-H), 0.42 (d,  $^3J_{\text{HH}} = 6.7$  Hz, 6H,  $\text{PdAl}_2$  Dipp- $\text{CH}_3$ ). Additional cyclohexyl peaks for the  $\text{PCy}_3$  ligand are obscured beneath the resonances for the Dipp-BDI ligand. Peaks for the *n*-hexane solvent of crystallisation of  $\text{PdAl}_2$  were also observed at  $\delta$  1.37-1.31 (br m) and 0.99 (t,  $^3J_{\text{HH}} = 6.9$  Hz).  $^{31}\text{P}\{^1\text{H}\}$  NMR (202.4 MHz,  $d_8$ -toluene, 233 K):  $\delta$  29.96 (s,  $\text{PdAl}_2$ ). **Elemental analysis**: calc. for  $\text{C}_{76}\text{H}_{115}\text{Al}_2\text{N}_4\text{PPd}$  – C 71.51%, H 9.09%, N 4.39%; found – C 71.42%, H 8.93%, N 4.27%.

## 2.2 Synthesis of Aluminated Arene Products

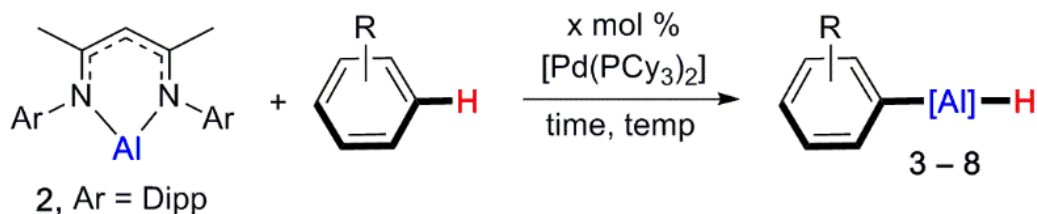

### 2.2.1 General Procedure for the Catalytic Syntheses of 3-7 from 2 for Liquid Substrates

Dipp-BDIAL (**2**, 5.0 mg, 0.0113 mmol) was dissolved in the substrate (0.55 mL, benzene, toluene, *o*-xylene, *m*-xylene, *p*-xylene) to form a red solution and added to an NMR tube containing a capillary insert standard (ferrocene in C<sub>6</sub>D<sub>6</sub>). The <sup>1</sup>H NMR spectrum was measured to obtain a *t* = 0 value (the ligand backbone proton was integrated vs the ferrocene standard). Pd(PCy<sub>3</sub>)<sub>2</sub> (11 μL of 0.1 M solution in substrate, 0.0011 mmol, 10 mol%) was then added to the NMR tube to form a red/brown solution after mixing. The reaction mixture was left to stand for 18 h at 25 °C at which point a colourless solution had formed. The <sup>1</sup>H NMR spectrum was measured again to obtain a value for the NMR yield. The substrate/solvent was then removed *in vacuo* and the non-volatiles dissolved in C<sub>6</sub>D<sub>6</sub> to obtain the NMR spectra of the product(s) in the absence of non-deuterated substrate.

### 2.2.2 Procedure for the Catalytic Syntheses of 8 from 2 and Biphenyl

Dipp-BDIAL (**2**, 5.0 mg, 0.0113 mmol), Pd(PCy<sub>3</sub>)<sub>2</sub> (~0.7 mg, 0.0011 mmol, ~10 mol%) and biphenyl (3.5 mg, 0.0226 mmol) were weighed into a vial and dissolved in cyclohexane (0.5 mL) and mixed thoroughly to form a red/brown solution. The reaction mixture was transferred to a Young's tap NMR tube and heated to 40 °C for 48 h at which point a colourless solution had formed. The solvent was removed *in vacuo* and the non-volatiles dissolved in C<sub>6</sub>D<sub>6</sub> and the products determined by NMR spectroscopy.

### 2.2.3 Characterisation of Aluminated Species

The aluminated products were synthesised on a larger scale by a non-catalytic route (see section 2.2.4) for full characterisation, including individual regioisomers. In each case the NMR spectra of the products formed catalytically and non-catalytically were compared and found to be identical.

### 2.2.4 Synthesis of [{(Dipp-NCMe)<sub>2</sub>CH}Al(Cl)H] (**S2**)

S-6

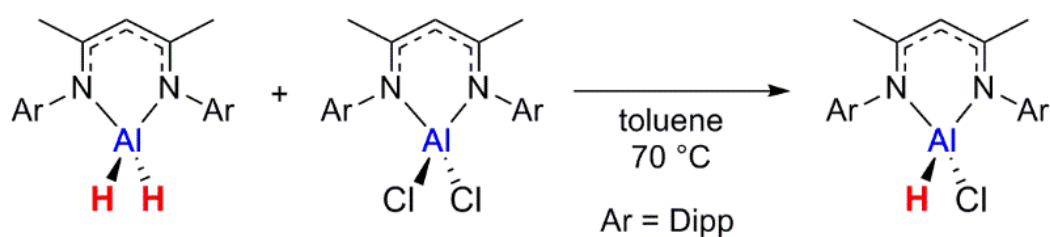

The synthesis of Dipp-BDIAIHCl was based on the procedure for the homologous Dipp-BD/GaHCl reported by Aldridge and co-workers.<sup>3</sup> Dipp-BDIAIH<sub>2</sub> (**S1**, 0.500 g, 1.12 mmol) and Dipp-BDIAICl<sub>2</sub> (0.577 g, 1.12 mmol) were dissolved in toluene (30 mL) and transferred to an ampoule. The ampoule was sealed and heated to 70 °C for 48 hours. The toluene was removed *in vacuo* and the solid redissolved in Et<sub>2</sub>O (20 mL). The solution was transferred to a Schlenk tube by filter cannula and the volume reduced *in vacuo* to approx. 10 mL. Storage of the solution at -18 °C overnight led to formation of colourless crystals of Dipp-BDIAIHCl which were isolated by filter cannula and dried *in vacuo*. Reduction in volume of the mother liquor and storage at -35 °C led to 3 further crops of Dipp-BDIAIHCl (**S2**), combined yield (0.635 g, 59%). <sup>1</sup>H NMR (400 MHz, C<sub>6</sub>D<sub>6</sub>, 298 K): δ 7.16-7.11 (m, 4H, Ar-H), 7.08-7.05 (m, 2H, Ar-H), 4.87 (s, 1H, C-H), 3.47 (sept, <sup>3</sup>J<sub>HH</sub> = 6.8 Hz, 2H, -CMe<sub>2</sub>H), 3.30 (sept, <sup>3</sup>J<sub>HH</sub> = 6.7 Hz, 2H, -CMe<sub>2</sub>H), 1.51 (s, 6H, CH<sub>3</sub>), 1.47 (d, <sup>3</sup>J<sub>HH</sub> = 6.7 Hz, 6H, Dipp-CH<sub>3</sub>), 1.34 (d, <sup>3</sup>J<sub>HH</sub> = 6.7 Hz, 6H, Dipp-CH<sub>3</sub>), 1.12 (d, <sup>3</sup>J<sub>HH</sub> = 6.8 Hz, 6H, Dipp-CH<sub>3</sub>), 1.10 (d, <sup>3</sup>J<sub>HH</sub> = 6.8 Hz, 6H, Dipp-CH<sub>3</sub>). The signal for Al-H could not be observed. <sup>13</sup>C{<sup>1</sup>H} NMR (100.6 MHz, C<sub>6</sub>D<sub>6</sub>, 298 K) δ 170.75, 144.89, 143.73, 138.30, 127.65, 124.70, 124.29, 97.27, 28.46, 28.19, 25.11, 24.86, 24.52, 24.32, 22.88 ppm. **Elemental analysis:** calc. for C<sub>29</sub>H<sub>42</sub>AlClN<sub>2</sub> – C 72.38%, H 8.80%, N 5.83%; found – C 72.26%, H 8.63%, N 5.78%.

### 2.2.5 General Procedure for Non-Catalytic Synthesis of Dipp-BDIAIHAr

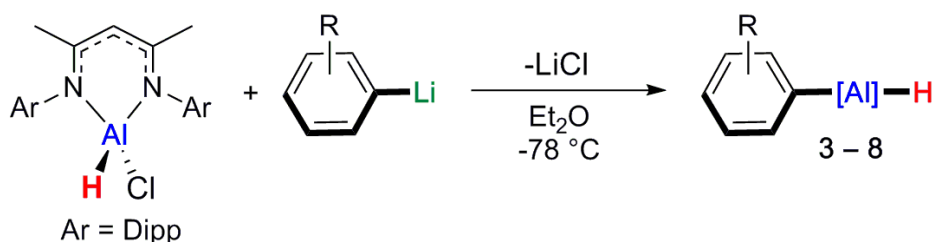

The aryllithium reagents were synthesised from reaction of the parent iodo- or bromo-aryls with <sup>n</sup>BuLi in pentane to precipitate the aryl lithium as a solid which was dried and isolated in

<sup>3</sup> J. Turner, J.A.B. Abdalla, J.I. Bates, R. Tirfoin, M.J. Kelly, N. Phillips, S. Aldridge, *Chem. Sci.*, 2013, **4**, 4245.

accordance with the literature procedure for PhLi.<sup>4</sup> Dipp-BDIAIHCl (**S2**, 0.100 g, 0.208 mmol, see section 2.2.4) and the aryllithium reagent (0.250 mmol, 1.2 equiv.) were weighed into separate Schlenks and dissolved in Et<sub>2</sub>O (5 mL each). The solutions were cooled to -78 °C and the aryllithium solution transferred to the Dipp-BDIAIHCl solution by cannula. The solution was stirred for 5 min at -78 °C and allowed to warm to room temperature, during which time a white precipitate formed. After stirring for 1 h at room temperature, the Et<sub>2</sub>O was removed *in vacuo* and *n*-hexane (10 mL) added with vigorous stirring. The solution was filtered by cannula and the solvent again removed *in vacuo*. The products were crystallised from *n*-hexane (~0.5-2 mL) at -35 °C in the glove box freezer.

### 2.2.6 Synthesis of Dipp-BDIAI(Ph)H (**3a**):

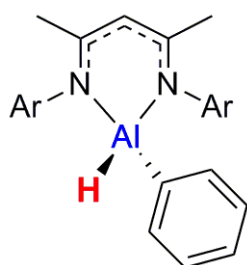

**3a**, Ar = Dipp

Catalytic synthesis from the reaction of **2** with benzene via catalytic procedure in section 2.2.1 (0.5 mol%, catalyst, 18 h, 25 °C). Yield: 97% by NMR spectroscopy. Also synthesised non-catalytically from procedure in section 2.2.5 (yield 76 mg, 70%) where sample for characterisation was isolated. See section 5.2.1 for comparison of NMR spectra. <sup>1</sup>H NMR (400 MHz, C<sub>6</sub>D<sub>6</sub>, 298 K): δ 7.35-7.32 (m, 2H, Ar-H), 7.20-6.99 (overlapping m, 9H, Ar-H), 4.94 (s, 1H, C-H), 4.71 (br {FWHM ~ 160 Hz}, 1H, Al-H), 3.60 (sept, <sup>3</sup>J<sub>HH</sub> = 6.8 Hz, 2H, -CHMe<sub>2</sub>), 3.15 (sept, <sup>3</sup>J<sub>HH</sub> = 6.8 Hz, 2H, -CHMe<sub>2</sub>), 1.59 (s, 6H, CH<sub>3</sub>), 1.44 (d, <sup>3</sup>J<sub>HH</sub> = 6.8 Hz, 6H, Dipp-CH<sub>3</sub>), 1.18 (d, <sup>3</sup>J<sub>HH</sub> = 6.8 Hz, 6H, Dipp-CH<sub>3</sub>), 1.09 (d, <sup>3</sup>J<sub>HH</sub> = 6.8 Hz, 6H, Dipp-CH<sub>3</sub>), 0.59 (d, <sup>3</sup>J<sub>HH</sub> = 6.8 Hz, 6H, Dipp-CH<sub>3</sub>). <sup>13</sup>C{<sup>1</sup>H} NMR (100.6 MHz, C<sub>6</sub>D<sub>6</sub>, 298 K): δ 170.23, 144.36, 143.98, 139.98, 137.76, 127.49, 127.20, 126.72, 124.38, 124.36, 97.04, 28.49, 28.25, 25.01, 24.34, 24.27, 23.69, 22.89. The signal for C–Al could not be observed.

### 2.2.7 Synthesis of Dipp-BDIAI{C<sub>6</sub>H<sub>4</sub>(2-Me)}H (**4-o**):

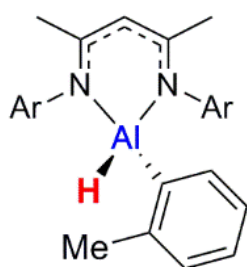

**4o**, Ar = Dipp

Formed as part of a mixture of regioisomers from the reaction of **2** with toluene via catalytic procedure in section 2.2.1 (10 mol%, catalyst, 18 h, 25 °C). Combined yield for **4-o**, **4-m** and **4-p**: 93% by NMR spectroscopy (**4-o**:**4-m**:**4-p** = 42:46:12). Also synthesised non-catalytically from procedure in section 2.2.5 (yield 97 mg, 87%) where sample for characterisation was isolated. See section 5.2.2 for comparison of NMR spectra. <sup>1</sup>H NMR (400 MHz, C<sub>6</sub>D<sub>6</sub>, 298 K): δ 7.72 (br d, <sup>3</sup>J<sub>HH</sub> = 6.6 Hz, 1H, Ar-H), 7.15-7.07 (overlapping m, 6H, Ar-H), 6.96 (apparent dd, <sup>3</sup>J<sub>HH</sub> = 7.0 Hz, <sup>4</sup>J<sub>HH</sub> = 2.2 Hz, 2H, Ar-H), 6.96-6.89 (overlapping m, 1H, Ar-H), 4.94 (s, 1H, C-H), 4.60 (br {FWHM ~ 170 Hz}, 1H, Al-H), 3.56 (sept, <sup>3</sup>J<sub>HH</sub> = 6.8 Hz, 2H,

<sup>4</sup> S. Thapa, P. Basnet, S.K. Gurung, R. Giri, *Chem. Commun.*, 2015, **51**, 4009.



-CHMe<sub>2</sub>), 3.10 (sept, <sup>3</sup>J<sub>HH</sub> = 6.8 Hz, 2H, -CHMe<sub>2</sub>), 2.60 (br s, 3H, Ar-CH<sub>3</sub>), 1.54 (s, 6H, CH<sub>3</sub>), 1.48 (d, <sup>3</sup>J<sub>HH</sub> = 6.8 Hz, 6H, Dipp-CH<sub>3</sub>), 1.17 (d, <sup>3</sup>J<sub>HH</sub> = 6.8 Hz, 6H, Dipp-CH<sub>3</sub>), 1.09 (d, <sup>3</sup>J<sub>HH</sub> = 6.8 Hz, 6H, Dipp-CH<sub>3</sub>), 0.39 (d, <sup>3</sup>J<sub>HH</sub> = 6.8 Hz, 6H, Dipp-CH<sub>3</sub>). <sup>13</sup>C{<sup>1</sup>H} NMR (100.6 MHz, C<sub>6</sub>D<sub>6</sub>, 298 K): δ 169.89, 145.22, 145.04, 143.57, 139.85, 139.54, 128.32, 128.04, 127.22, 124.49, 124.28, 123.94, 97.26, 28.68, 27.69, 25.81 (Ar-CH<sub>3</sub>), 24.69, 24.48, 24.38, 23.59, 23.02. The signal for C–Al could not be observed. **Elemental analysis:** calc. for C<sub>36</sub>H<sub>49</sub>AlN<sub>2</sub> – C 80.54%, H 9.21%, N 5.22%; found – C 80.38%, H 9.27%, N 5.38%.

### 2.2.8 Synthesis of Dipp-BD/Al{C<sub>6</sub>H<sub>4</sub>(3-Me)}H (**4-m**):

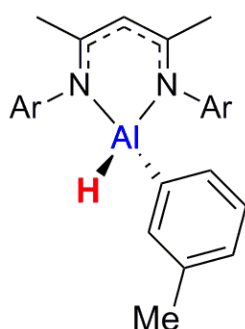

**4m**, Ar = Dipp

Formed as part of a mixture of regioisomers from the reaction of **2** with toluene via catalytic procedure in section 2.2.1 (10 mol%, catalyst, 18 h, 25 °C). Combined yield for **4-o**, **4-m** and **4-p**: 93% by NMR spectroscopy (**4-o**:**4-m**:**4-p** = 42:46:12). Also synthesised non-catalytically from procedure in section 2.2.5 (yield 87 mg, 78%) where sample for characterisation was isolated. See section 5.2.2 for comparison of NMR spectra. <sup>1</sup>H NMR (400 MHz, C<sub>6</sub>D<sub>6</sub>, 298 K): δ 7.16-7.11 (overlapping m, 5H, Ar-H), 7.05-6.97 (overlapping m, 4H, Ar-H), 6.94-6.90 (m, 1H, Ar-H), 4.94 (s, 1H, C-H), 4.72 (br {FWHM ~ 150 Hz}, 1H, Al-H), 3.61 (sept, <sup>3</sup>J<sub>HH</sub> = 6.8 Hz, 2H, -CHMe<sub>2</sub>), 3.18 (sept, <sup>3</sup>J<sub>HH</sub> = 6.8 Hz, 2H, -CHMe<sub>2</sub>), 2.02 (s, 3H, Ar-CH<sub>3</sub>), 1.60 (s, 6H, CH<sub>3</sub>), 1.44 (d, <sup>3</sup>J<sub>HH</sub> = 6.8 Hz, 6H, Dipp-CH<sub>3</sub>), 1.19 (d, <sup>3</sup>J<sub>HH</sub> = 6.8 Hz, 6H, Dipp-CH<sub>3</sub>), 1.10 (d, <sup>3</sup>J<sub>HH</sub> = 6.8 Hz, 6H, Dipp-CH<sub>3</sub>), 0.64 (d, <sup>3</sup>J<sub>HH</sub> = 6.8 Hz, 6H, Dipp-CH<sub>3</sub>). <sup>13</sup>C{<sup>1</sup>H} NMR (100.6 MHz, C<sub>6</sub>D<sub>6</sub>, 298 K): δ 170.15, 144.32, 144.11, 140.10, 138.74, 134.99, 134.77, 128.06, 127.14, 126.64, 124.39, 124.28, 96.98, 28.45, 28.29, 25.12, 24.33, 24.32, 23.65, 22.88, 21.18 (Ar-CH<sub>3</sub>). The signal for C–Al could not be observed.

### 2.2.9 Synthesis of Dipp-BD/Al{C<sub>6</sub>H<sub>4</sub>(4-Me)}H (**4-p**):

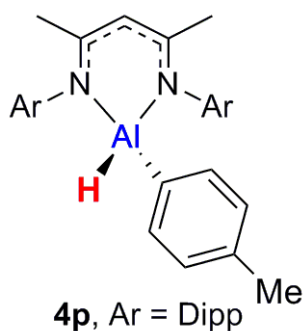

**4p**, Ar = Dipp

Formed as part of a mixture of regioisomers from the reaction of **2** with toluene via catalytic procedure in section 2.2.1 (10 mol%, catalyst, 18 h, 25 °C). Combined yield for **4-o**, **4-m** and **4-p**: 93% by NMR spectroscopy (**4-o**:**4-m**:**4-p** = 42:46:12). Also synthesised non-catalytically from procedure in section 2.2.5 (yield 79 mg, 71%) where sample for characterisation was isolated. See section 5.2.2 for comparison of NMR spectra. <sup>1</sup>H NMR (400 MHz, C<sub>6</sub>D<sub>6</sub>, 298 K): δ 7.24 (d, <sup>3</sup>J<sub>HH</sub> = 7.6 Hz, 2H, Ar-H), 7.17-7.10 (overlapping m, 4H, Ar-H), 7.03 (apparent dd, <sup>3</sup>J<sub>HH</sub> = 6.2 Hz, <sup>4</sup>J<sub>HH</sub> = 3.1 Hz, 2H, Ar-H), 6.86 (d, <sup>3</sup>J<sub>HH</sub> = 7.6 Hz, 2H, Ar-H), 4.95

(s, 1H, C-H), 4.72 (br {FWHM ~ 150 Hz}, 1H, Al-H), 3.61 (sept,  $^3J_{\text{HH}} = 6.8$  Hz, 2H, -CHMe<sub>2</sub>), 3.19 (sept,  $^3J_{\text{HH}} = 6.8$  Hz, 2H, -CHMe<sub>2</sub>), 2.05 (s, 3H, Ar-CH<sub>3</sub>), 1.60 (s, 6H, CH<sub>3</sub>), 1.44 (d,  $^3J_{\text{HH}} = 6.8$  Hz, 6H, Dipp-CH<sub>3</sub>), 1.18 (d,  $^3J_{\text{HH}} = 6.8$  Hz, 6H, Dipp-CH<sub>3</sub>), 1.10 (d,  $^3J_{\text{HH}} = 6.8$  Hz, 6H, Dipp-CH<sub>3</sub>), 0.65 (d,  $^3J_{\text{HH}} = 6.8$  Hz, 6H, Dipp-CH<sub>3</sub>).  **$^{13}\text{C}\{^1\text{H}\}$  NMR** (100.6 MHz, C<sub>6</sub>D<sub>6</sub>, 298 K):  $\delta$  170.14, 144.32, 144.06, 140.11, 137.87, 136.44, 127.54, 127.15, 124.36, 124.31, 97.02, 28.46, 28.25, 25.08, 24.32, 24.28, 23.76, 22.89, 21.21 (Ar-CH<sub>3</sub>). The signal for C–Al could not be observed.

### 2.2.10 Synthesis of Dipp-BDIAI{C<sub>6</sub>H<sub>3</sub>(2,5-Me<sub>2</sub>)}H (**5**):

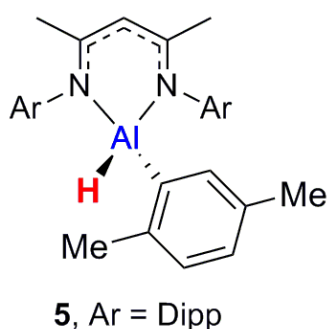

Catalytic synthesis from the reaction of **2** with *p*-xylene via catalytic procedure in section 2.2.1 (10 mol%, catalyst, 18 h, 25 °C). Yield: 88% by NMR spectroscopy. Isolated as a pure solid from this reaction mixture by crystallisation from *n*-hexane (~1 mL) at -35 °C.  **$^1\text{H}$  NMR** (400 MHz, C<sub>6</sub>D<sub>6</sub>, 298 K):  $\delta$  7.49 (br s, 1H, Ar-H), 7.16-7.06 (overlapping m, 5H, Ar-H), 7.00-6.94 (overlapping m, 3H, Ar-H), 4.95 (s, 1H, C-H), 4.62 (br {FWHM ~ 120 Hz}, 1H, Al-H), 3.58 (sept,  $^3J_{\text{HH}} = 6.8$  Hz, 2H, -CHMe<sub>2</sub>), 3.13 (sept,  $^3J_{\text{HH}} = 6.8$  Hz, 2H, -CHMe<sub>2</sub>), 2.63 (br s, 3H, Ar-CH<sub>3</sub>), 1.96 (s, 3H, Ar-CH<sub>3</sub>), 1.54 (s, 6H, CH<sub>3</sub>), 1.50 (d,  $^3J_{\text{HH}} = 6.8$  Hz, 6H, Dipp-CH<sub>3</sub>), 1.18 (d,  $^3J_{\text{HH}} = 6.8$  Hz, 6H, Dipp-CH<sub>3</sub>), 1.11 (d,  $^3J_{\text{HH}} = 6.8$  Hz, 6H, Dipp-CH<sub>3</sub>), 0.42 (d,  $^3J_{\text{HH}} = 6.8$  Hz, 6H, Dipp-CH<sub>3</sub>).

**$^{13}\text{C}\{^1\text{H}\}$  NMR** (100.6 MHz, C<sub>6</sub>D<sub>6</sub>, 298 K):  $\delta$  169.77, 145.05, 143.61, 140.58, 139.92, 132.35, 128.73, 128.33, 127.98, 127.22, 124.50, 124.30, 97.21, 28.68, 27.62, 25.47 (Ar-CH<sub>3</sub>), 24.74, 24.49, 24.45, 23.61, 22.70, 20.56 (Ar-CH<sub>3</sub>). The signal for C–Al could not be observed. Peaks for *n*-hexane solvent of crystallisation were also observed.

### 2.2.11 Synthesis of Dipp-BDIAI{C<sub>6</sub>H<sub>3</sub>(2,4-Me<sub>2</sub>)}H (**6-o**):

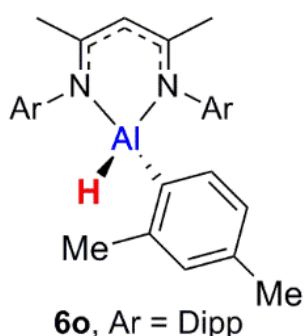

Formed as part of a mixture of regioisomers from the reaction of **2** with *m*-xylene via catalytic procedure in section 2.2.1 (10 mol%, catalyst, 18 h, 25 °C). Combined yield for **6o** and **6m**: 87% by NMR spectroscopy (**6o**:**6m** = 49:51). Also synthesised non-catalytically from procedure in section 2.2.5 (yield 52 mg, 45%) where sample for characterisation was isolated. See section 5.2.3 for comparison of NMR spectra.  **$^1\text{H}$  NMR** (400 MHz, C<sub>6</sub>D<sub>6</sub>, 298 K):  $\delta$  7.65 (br d,  $^3J_{\text{HH}} = 7.1$  Hz, 1H, Ar-H), 7.13-7.07 (overlapping m, 4H, Ar-H), 6.99-6.95 (overlapping m, 3H, Ar-H), 6.77 (br d,  $^3J_{\text{HH}} = 7.1$  Hz, 1H, Ar-H), 4.96 (s, 1H, C-H), 4.72 (br {FWHM ~ 160 Hz}, 1H, Al-H), 3.57 (sept,  $^3J_{\text{HH}} = 6.8$  Hz, 2H, -CHMe<sub>2</sub>), 3.13 (sept,  $^3J_{\text{HH}} = 6.8$  Hz, 2H, -CHMe<sub>2</sub>), 2.59 (br s, 3H, Ar-CH<sub>3</sub>), 2.15 (s, 3H, Ar-CH<sub>3</sub>), 1.55 (s, 6H, CH<sub>3</sub>), 1.48 (d,  $^3J_{\text{HH}} = 6.8$  Hz, 6H, Dipp-CH<sub>3</sub>), 1.18 (d,  $^3J_{\text{HH}} = 6.8$

Hz, 6H, Dipp-CH<sub>3</sub>), 1.11 (d, <sup>3</sup>J<sub>HH</sub> = 6.8 Hz, 6H, Dipp-CH<sub>3</sub>), 0.42 (d, <sup>3</sup>J<sub>HH</sub> = 6.8 Hz, 6H, Dipp-CH<sub>3</sub>). <sup>13</sup>C{<sup>1</sup>H} NMR (100.6 MHz, C<sub>6</sub>D<sub>6</sub>, 298 K): δ 169.80, 145.07, 143.59, 139.96, 139.68, 137.01, 129.35, 127.18, 124.72, 124.46, 124.26, 97.21, 28.67, 27.67, 25.69 (Ar-CH<sub>3</sub>), 24.69, 24.47, 24.37, 23.65, 23.02, 21.17 (Ar-CH<sub>3</sub>). Peaks for *n*-hexane solvent of crystallisation were also observed. The signal for C–Al and one other C(ipso) could not be observed. **Elemental analysis:** calc. for C<sub>37</sub>H<sub>51</sub>AlN<sub>2</sub> – C 80.67%, H 9.34%, N 5.09%; found – C 80.48%, H 9.39%, N 5.02%.

**2.2.12 Synthesis of Dipp-BDIAI{C<sub>6</sub>H<sub>3</sub>(3,5-Me<sub>2</sub>)}H (6-m):** Formed as part of a mixture of

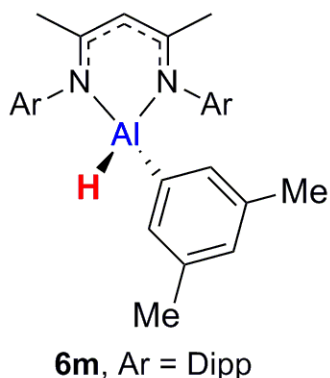

regioisomers from the reaction of **2** with *m*-xylene via catalytic procedure in section 2.2.1 (10 mol%, catalyst, 18 h, 25 °C). Combined yield for **6-o** and **6-m**: 87% by NMR spectroscopy (**6-o**:**6-m** = 49:51). Also synthesised non-catalytically from procedure in section 2.2.5 (yield 62 mg, 54%) where sample for characterisation was isolated. See section 5.2.3 for comparison of NMR spectra. <sup>1</sup>H NMR (400 MHz, C<sub>6</sub>D<sub>6</sub>, 298 K): δ 7.17-7.15

(overlapping m with residual solvent peak, 4H, Ar-H), 7.04 (apparent dd, <sup>3</sup>J<sub>HH</sub> = 5.6 Hz, <sup>4</sup>J<sub>HH</sub> = 3.7 Hz, 2H, Ar-H), 6.82 (s, 2H, Ar-H), 6.75 (s, 1H, Ar-H), 4.95 (s, 1H, C-H), 4.73 (br {FWHM ~ 150 Hz}, 1H, Al-H), 3.62 (sept, <sup>3</sup>J<sub>HH</sub> = 6.8 Hz, 2H, -CHMe<sub>2</sub>), 3.21 (sept, <sup>3</sup>J<sub>HH</sub> = 6.8 Hz, 2H, -CHMe<sub>2</sub>), 2.06 (s, 6H, Ar-CH<sub>3</sub>), 1.62 (s, 6H, CH<sub>3</sub>), 1.46 (d, <sup>3</sup>J<sub>HH</sub> = 6.8 Hz, 6H, Dipp-CH<sub>3</sub>), 1.20 (d, <sup>3</sup>J<sub>HH</sub> = 6.8 Hz, 6H, Dipp-CH<sub>3</sub>), 1.12 (d, <sup>3</sup>J<sub>HH</sub> = 6.8 Hz, 6H, Dipp-CH<sub>3</sub>), 0.67 (d, <sup>3</sup>J<sub>HH</sub> = 6.8 Hz, 6H, Dipp-CH<sub>3</sub>). <sup>13</sup>C{<sup>1</sup>H} NMR (100.6 MHz, C<sub>6</sub>D<sub>6</sub>, 298 K): δ 170.07, 144.28, 144.21, 140.18, 135.77, 134.84, 128.94, 127.07, 124.40, 124.20, 96.91, 28.41, 28.35, 25.21, 24.41, 24.32, 23.61, 22.88, 21.10 (Ar-CH<sub>3</sub>). The signal for C–Al could not be observed. **Elemental analysis:** calc. for C<sub>37</sub>H<sub>51</sub>AlN<sub>2</sub> – C 80.67%, H 9.34%, N 5.09%; found – C 80.62%, H 9.42%, N 5.05%.

**2.2.13 Synthesis of Dipp-BDIAI{C<sub>6</sub>H<sub>3</sub>(2,3-Me<sub>2</sub>)}H (7-o):** Formed as part of a mixture of

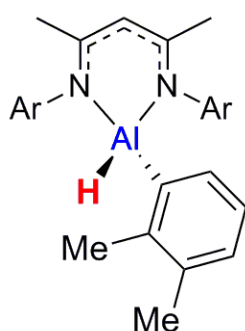

**7o**, Ar = Dipp

regioisomers from the reaction of **2** with *o*-xylene via catalytic procedure in section 2.2.1 (10 mol%, catalyst, 18 h, 25 °C). Combined yield for **7-o** and **7-m**: 88% by NMR spectroscopy (**7-o**:**7-m** = 43:57). Also synthesised non-catalytically from procedure in section 2.2.5 (yield 46 mg, 40%) where sample for characterisation was isolated. See section 5.2.4 for comparison of NMR spectra. **<sup>1</sup>H NMR** (400 MHz, C<sub>6</sub>D<sub>6</sub>, 298 K): δ 7.57 (br d, <sup>3</sup>J<sub>HH</sub> = 7.1 Hz, 1H, Ar-H), 7.13-7.06 (m, 4H, Ar-H), 7.01 (br d, <sup>3</sup>J<sub>HH</sub> = 7.1 Hz, 1H, Ar-H), 6.94 (apparent dd, J<sub>HH</sub> = 7.3 Hz, J<sub>HH</sub> = 2.0 Hz, 2H, Ar-H), 6.89 (br t, <sup>3</sup>J<sub>HH</sub> = 7.1 Hz, 1H, Ar-H), 4.96 (s, 1H, C-H), 4.60 (br {FWHM ~ 160 Hz}, 1H, Al-H), 3.58 (sept, <sup>3</sup>J<sub>HH</sub> = 6.8 Hz, 2H, -CHMe<sub>2</sub>), 3.09 (sept, <sup>3</sup>J<sub>HH</sub> = 6.8 Hz, 2H, -CHMe<sub>2</sub>), 2.55 (s, 3H, Ar-CH<sub>3</sub>), 2.23 (s, 3H, Ar-CH<sub>3</sub>), 1.56 (s, 6H, CH<sub>3</sub>), 1.50 (d, <sup>3</sup>J<sub>HH</sub> = 6.8 Hz, 6H, Dipp-CH<sub>3</sub>), 1.18 (d, <sup>3</sup>J<sub>HH</sub> = 6.8 Hz, 6H, Dipp-CH<sub>3</sub>), 1.09 (d, <sup>3</sup>J<sub>HH</sub> = 6.8 Hz, 6H, Dipp-CH<sub>3</sub>), 0.33 (d, <sup>3</sup>J<sub>HH</sub> = 6.8 Hz, 6H, Dipp-CH<sub>3</sub>). **<sup>13</sup>C{<sup>1</sup>H} NMR** (100.6 MHz, C<sub>6</sub>D<sub>6</sub>, 298 K): δ 169.78, 144.98, 143.61, 143.37, 139.85, 137.71, 134.49, 129.73, 127.20, 124.75, 124.45, 124.29, 97.05, 28.68, 27.62, 24.68, 24.51, 24.50, 24.14 (Ar-CH<sub>3</sub>), 23.60, 23.01, 20.38 (Ar-CH<sub>3</sub>). The signal for C–Al could not be observed. **Elemental analysis**: calc. for C<sub>37</sub>H<sub>51</sub>AlN<sub>2</sub> – C 80.67%, H 9.34%, N 5.09%; found – C 80.51%, H 9.49%, N 5.16%.

**2.2.14 Synthesis of Dipp-BDIAI{C<sub>6</sub>H<sub>3</sub>(3,4-Me<sub>2</sub>)}H (7-m):** Formed as part of a mixture of

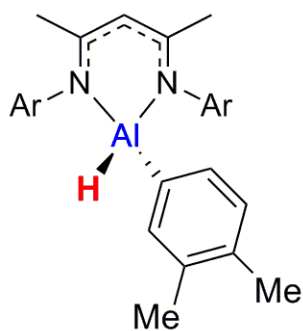

**7m**, Ar = Dipp

regioisomers from the reaction of **2** with *o*-xylene via catalytic procedure in section 2.2.1 (10 mol%, catalyst, 18 h, 25 °C). Combined yield for **7-o** and **7-m**: 88% by NMR spectroscopy (**7-o**:**7-m** = 43:57). Also synthesised non-catalytically from procedure in section 2.2.5 (yield 52 mg, 45%) where sample for characterisation was isolated. See section 5.2.4 for comparison of NMR spectra. **<sup>1</sup>H NMR** (400 MHz, C<sub>6</sub>D<sub>6</sub>, 298 K): δ 7.16-7.15 (overlapping m with residual solvent peak, 4H, Ar-H), 7.05-7.02 (overlapping m, 3H, Ar-H), 6.93 (s, 1H, Ar-H), 6.85 (d, <sup>3</sup>J<sub>HH</sub> = 7.1 Hz, 1H, Ar-H), 4.96 (s, 1H, C-H), 4.74 (br {FWHM ~ 130 Hz}, 1H, Al-H), 3.62 (sept, <sup>3</sup>J<sub>HH</sub> = 6.8 Hz, 2H, -CHMe<sub>2</sub>), 3.22 (sept, <sup>3</sup>J<sub>HH</sub> = 6.8 Hz, 2H, -CHMe<sub>2</sub>), 1.99 (s, 3H, Ar-CH<sub>3</sub>), 1.95 (s, 3H, Ar-CH<sub>3</sub>), 1.61 (s, 6H, CH<sub>3</sub>), 1.44 (d, <sup>3</sup>J<sub>HH</sub> = 6.8 Hz, 6H, Dipp-CH<sub>3</sub>), 1.19 (d, <sup>3</sup>J<sub>HH</sub> = 6.8 Hz, 6H, Dipp-CH<sub>3</sub>), 1.11 (d, <sup>3</sup>J<sub>HH</sub> = 6.8 Hz, 6H, Dipp-CH<sub>3</sub>), 0.70 (d, <sup>3</sup>J<sub>HH</sub> = 6.8 Hz, 6H, Dipp-CH<sub>3</sub>). **<sup>13</sup>C{<sup>1</sup>H} NMR** (100.6 MHz, C<sub>6</sub>D<sub>6</sub>, 298 K): δ 170.07, 144.24, 144.22, 140.24, 139.42, 135.55, 134.92, 133.71, 128.12, 127.09, 124.39, 124.22, 96.98, 28.40, 28.31, 25.23, 24.34, 24.29, 23.70, 22.88, 19.44 (Ar-CH<sub>3</sub>), 19.14 (Ar-

CH<sub>3</sub>). The signal for C–Al could not be observed. **Elemental analysis:** calc. for C<sub>37</sub>H<sub>51</sub>AlN<sub>2</sub> – C 80.67%, H 9.34%, N 5.09%; found – C 80.45%, H 9.12%, N 4.97%.

### 2.2.15 Synthesis of Dipp-BDIAI(C<sub>6</sub>H<sub>4</sub>(3-Ph))H (**8-m**):

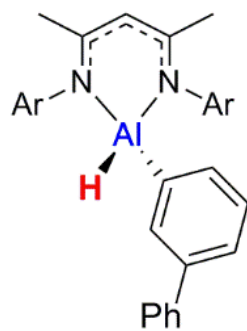

**8m**, Ar = Dipp

Formed as part of a mixture of regioisomers from the reaction of **2** with biphenyl via catalytic procedure in section 2.2.2 (10 mol%, catalyst, 48 h, 40 °C). Combined yield for **8-m** and **8-p**: 85% by NMR spectroscopy (**8-m**:**8-p** = 65:35). Also synthesised non-catalytically from procedure in section 2.2.5 (yield 62 mg, 50%) where sample for characterisation was isolated. See section 5.2.5 for comparison of NMR spectra. **<sup>1</sup>H NMR** (400 MHz, C<sub>6</sub>D<sub>6</sub>, 298 K): δ 7.60 (br d, <sup>3</sup>J<sub>HH</sub> = 2.1 Hz, 1H, Ar-H), 7.37-7.33 (m, 3H, Ar-H), 7.24-7.18 (m, 3H, Ar-H), 7.16-7.05 (overlapping m, 6H, Ar-H), 7.03-7.00 (m, 2H, Ar-H), 4.94 (s, 1H, C-H), 4.78 (br {FWHM ~ 140 Hz}, 1H, Al-H), 3.61 (sept, <sup>3</sup>J<sub>HH</sub> = 6.8 Hz, 2H, -CHMe<sub>2</sub>), 3.19 (sept, <sup>3</sup>J<sub>HH</sub> = 6.8 Hz, 2H, -CHMe<sub>2</sub>), 1.59 (s, 6H, CH<sub>3</sub>), 1.43 (d, <sup>3</sup>J<sub>HH</sub> = 6.8 Hz, 6H, Dipp-CH<sub>3</sub>), 1.18 (d, <sup>3</sup>J<sub>HH</sub> = 6.8 Hz, 6H, Dipp-CH<sub>3</sub>), 1.07 (d, <sup>3</sup>J<sub>HH</sub> = 6.8 Hz, 6H, Dipp-CH<sub>3</sub>), 0.62 (d, <sup>3</sup>J<sub>HH</sub> = 6.8 Hz, 6H, Dipp-CH<sub>3</sub>). **<sup>13</sup>C{<sup>1</sup>H} NMR** (100.6 MHz, C<sub>6</sub>D<sub>6</sub>, 298 K): δ 170.32, 144.28, 144.15, 142.49, 140.04, 138.97, 136.74, 136.56, 128.34, 127.24, 127.09, 127.05, 126.30, 126.26, 124.45, 124.43, 97.10, 28.48, 28.31, 25.12, 24.30, 24.28, 23.66, 22.87. The signal for C–Al could not be observed. **Elemental analysis:** calc. for C<sub>41</sub>H<sub>51</sub>AlN<sub>2</sub> – C 82.22%, H 8.59%, N 4.68%; found – C 82.18%, H 8.70%, N 4.56%.

### 2.2.16 Synthesis of Dipp-BDIAI(C<sub>6</sub>H<sub>4</sub>(4-Ph))H (**8-p**):

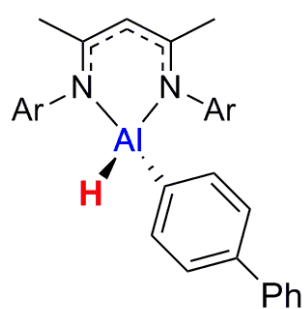

**8p**, Ar = Dipp

Formed as part of a mixture of regioisomers from the reaction of **2** with biphenyl via catalytic procedure in section 2.2.2 (10 mol%, catalyst, 48 h, 40 °C). Combined yield for **8-m** and **8-p**: 85% by NMR spectroscopy (**8-m**:**8-p** = 65:35). Also synthesised non-catalytically from procedure in section 2.2.5 (yield 51 mg, 41%) where sample for characterisation was isolated. See section 5.2.5 for comparison of NMR spectra. **<sup>1</sup>H NMR** (400 MHz, C<sub>6</sub>D<sub>6</sub>, 298 K): δ 7.43-7.37 (m, 5H, Ar-H), 7.32-7.29 (m, 2H, Ar-H), 7.20-7.12 (overlapping m, 5H, Ar-H), 7.08-7.02 (overlapping m, 3H, Ar-H), 4.96 (s, 1H, C-H), 4.75 (br {FWHM ~ 120 Hz}, 1H, Al-H), 3.62 (sept, <sup>3</sup>J<sub>HH</sub> = 6.8 Hz, 2H, -CHMe<sub>2</sub>), 3.19 (sept, <sup>3</sup>J<sub>HH</sub> = 6.8 Hz, 2H, -CHMe<sub>2</sub>), 1.61 (s, 6H, CH<sub>3</sub>), 1.46 (d, <sup>3</sup>J<sub>HH</sub> = 6.8 Hz, 6H, Dipp-CH<sub>3</sub>), 1.20 (d, <sup>3</sup>J<sub>HH</sub> = 6.8 Hz, 6H, Dipp-CH<sub>3</sub>), 1.10 (d, <sup>3</sup>J<sub>HH</sub> = 6.8 Hz, 6H, Dipp-CH<sub>3</sub>), 0.64 (d, <sup>3</sup>J<sub>HH</sub> = 6.8 Hz, 6H, Dipp-CH<sub>3</sub>). **<sup>13</sup>C{<sup>1</sup>H} NMR** (100.6 MHz, C<sub>6</sub>D<sub>6</sub>, 298 K): δ 170.27,

144.37, 144.05, 140.04, 139.98, 138.27, 128.47, 127.25, 126.91, 126.53, 125.30, 124.42, 124.40, 97.06, 29.09, 28.51, 28.26, 25.06, 24.34, 24.28, 23.74, 22.89. The signal for C–Al and one other C(ipso) could not be observed. **Elemental analysis:** calc. for C<sub>41</sub>H<sub>51</sub>AlN<sub>2</sub> – C 82.22%, H 8.59%, N 4.68%; found – C 82.01%, H 8.69%, N 4.67%.

## 2.3 Catalytic Synthesis of Aluminated Arene Product from 1

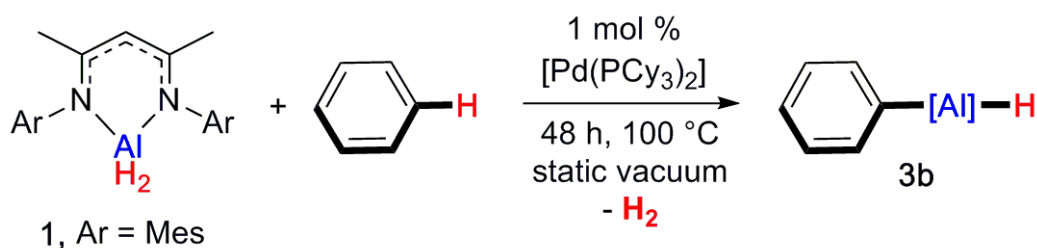

### 2.3.1 Synthesis of Mes-BDAl(Ph)H (3b)

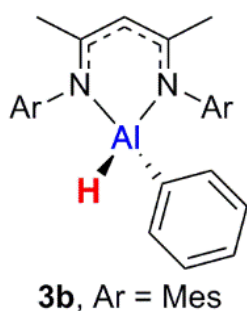

**1** (160 mg, 0.44 mmol) and [Pd(PCy<sub>3</sub>)<sub>2</sub>] (2.9 mg, 0.0044 mmol, 1 mol%) were dissolved in benzene (~5 mL) in the glove box. The solution transferred to a large Young's tap ampoule (~250 mL) and sealed. This was removed from the glove box degassed by the freeze/pump/thaw method (x 3) and followed by heating under vacuum to 100 °C in an oil bath for 48 h. The reaction mixture was cooled to 25 °C and the ampoule was attached to a vacuum line and the solvent removed *in vacuo*. The

ampoule was transferred back to the glove box and the residue dissolved in hexane (~5 mL) and filtered through a 0.45 μm syringe filter. The volume of the solution was reduced to ~2 mL *in vacuo* and the solution stored at -35 °C to form a white precipitate. The mother liquor was decanted by pipette and the solid dried *in vacuo*. A further crop of crude product was obtained by concentration of the mother liquor to ~0.5 mL and storage at -35 °C. The combined crude products were recrystallized by dissolving in the benzene (~1 mL) followed by addition of *n*-heptane (~2 mL). The solution was then concentrated *in vacuo* to ~1 mL and storage at -35 °C yielded **3b** as a white solid (yield 64 mg, 33%).

**<sup>1</sup>H NMR** (400 MHz, C<sub>6</sub>D<sub>6</sub>, 298 K): δ 7.81-7.77 (m, 2H, Ar-H), 7.21-7.17 (m, 3H, Ar-H), 6.75 (s, 2H, Mes-Ar-H), 6.56 (s, 2H, Mes-Ar-H), 4.94 (s, 1H, C-H), 4.76 (br {FWHM ~ 150 Hz}, 1H, Al-H), 2.40 (s, 6H, Mes-CH<sub>3</sub>), 2.03 (s, 6H, Mes-CH<sub>3</sub>), 1.92 (s, 6H, Mes-CH<sub>3</sub>), 1.53 (s, 6H, CH<sub>3</sub>) ppm. **<sup>13</sup>C{<sup>1</sup>H} NMR** (100.6 MHz, C<sub>6</sub>D<sub>6</sub>, 298 K): δ 169.61, 140.01, 138.04, 135.27, 133.44, 132.79, 129.59, 129.50, 127.70, 126.74, 96.65, 22.16, 20.46, 18.81, 18.59. The signal for C–

Al could not be observed. **Elemental analysis:** calc. for  $C_{29}H_{35}AlN_2$  – C 79.40%, H 8.05%, N 6.39%; found – C 79.31%, H 8.17%, N 6.47%.

## 2.4 Reactions of $Pd_2Al_2$

### 2.4.1 Synthesis of Mes-BDIAI(Ph)H (**3b**) using $Pd_2Al_2$ as a Catalyst

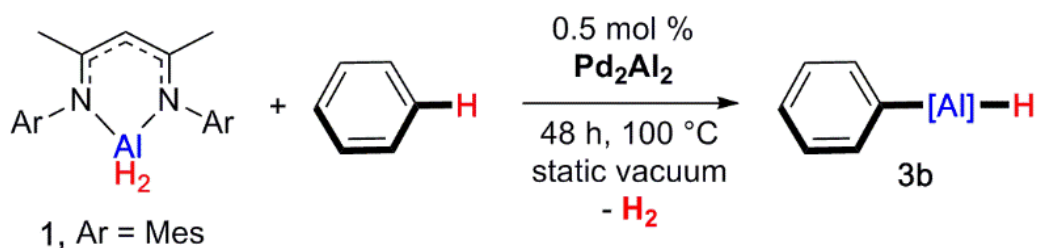

The catalytic procedure detailed in section 2.4.1 was repeated on a smaller scale, **1** (40 mg, 0.11 mmol) in  $C_6H_6$  (1 mL) but using  $Pd_2Al_2$  (0.8 mg, 0.00055 mmol, 0.5 mol%) rather than  $[Pd(PCy_3)_2]$  as the catalyst. Although  $Pd_2Al_2$  is insoluble in  $C_6H_6$  at room temperature, heating under vacuum led to a homogeneous yellow solution. Removal of the solvent and analysis of the crude by  $^1H$  NMR spectroscopy showed formation of **3b** as the major product.

### 2.4.2 Reaction of $Pd_2Al_2$ with Benzene in the Presence of $PCy_3$

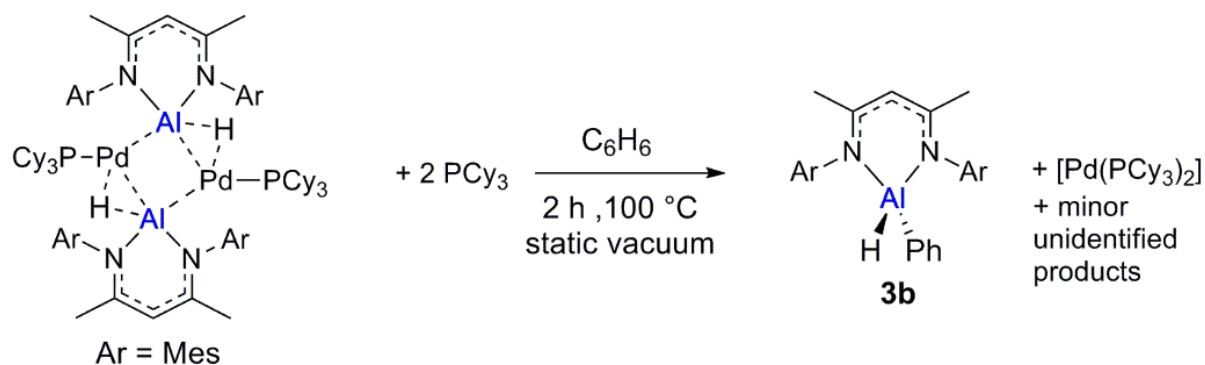

$[H\{Pd(PCy_3)\}(AIBDI-Mes)]_2$  ( $Pd_2Al_2$ , 10.0 mg, 0.0067 mmol) and  $PCy_3$  (3.7 mg, 0.013 mmol) were weighed into a small vial and  $C_6H_6$  (1 mL) was added. The solution was mixed but due to its insolubility, the red crystals of  $Pd_2Al_2$  did not dissolve. The suspension was transferred to an ampoule, carefully ensuring all solid was transferred. The suspension was then degassed by the freeze/pump/thaw method (x 3) and heated to 100 °C under vacuum for 2 h. Over this time the solid slowly dissolved and a yellow solution formed. After cooling to room temperature the solvent was removed *in vacuo* and the crude sample redissolved in  $C_6D_6$ .

The NMR spectrum showed formation of  $[\text{Pd}(\text{PCy}_3)_2]$  and **3b** as the major Al containing product.

## 2.5 C–H Almination Using Phosphine Free Catalyst

### 2.5.1 C–H Almination of Toluene from **2** Using $[\text{CpPd}(\eta^3\text{-C}_3\text{H}_4\text{Ph})]$ as the Catalyst

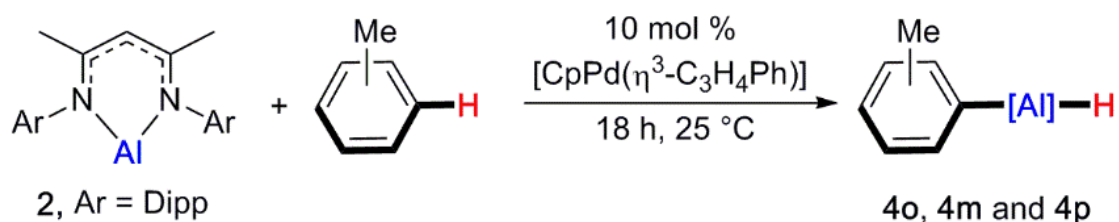

A reaction was carried out between **2** and toluene in the same manner as detailed in section 2.2.1 but using  $[\text{CpPd}(\eta^3\text{-C}_3\text{H}_4\text{Ph})]$  (0.0011 mmol, 10 mol%, see section 1.1) as the catalyst. After 18 h at 25 °C a brown solution was obtained and the  $^1\text{H}$  NMR spectrum (section 5.3.1) showed the same products **4-o**, **4-m** and **4-p** produced in the same ratio as when  $[\text{Pd}(\text{PCy}_3)_2]$  (10 mol%) was used as the catalyst.

## 2.6 Palladium Catalysed Reactivity of Dipp-BDIAI (**2**) with $\text{H}_2$

### 2.6.1 Reaction of $\text{H}_2$ with $[\text{Pd}(\text{PCy}_3)_2]$ and 2 equiv. Dipp-BDIAI (**2**)

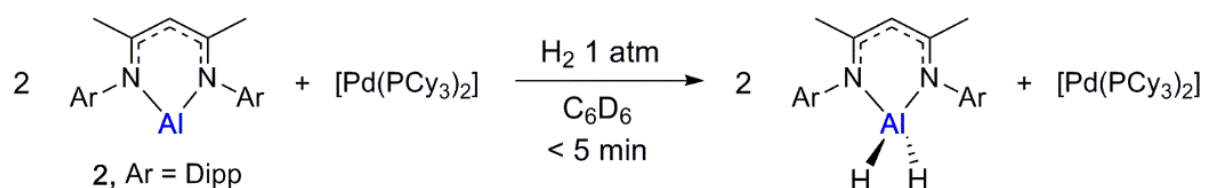

$[\text{Pd}(\text{PCy}_3)_2]$  (3.8 mg, 0.0056 mmol) and **2** (5.0 mg, 0.0113) were weighed into a small vial and  $\text{C}_6\text{D}_6$  (0.55 mL) was added. The solution was mixed to dissolve the solid to form a dark green/black solution and transferred to a Young's tap NMR tube. The tube was sealed and the NMR spectrum immediately recorded before  $\text{H}_2$  addition. The tube was then degassed by the freeze/pump/thaw method (x 2) and  $\text{H}_2$  (1 atm) was added immediately. Upon inversion the solution began to decolourise and after 30 seconds of mixing the solution had become pale yellow. The  $^1\text{H}$  and  $^{31}\text{P}\{^1\text{H}\}$  NMR spectra (section 5.4.1) showed the products to be  $[\text{Pd}(\text{PCy}_3)_2]$  and Dipp-BDIAIH<sub>2</sub> (**S1**).



### 2.6.2 Reaction of H<sub>2</sub> with [Pd(PCy<sub>3</sub>)<sub>2</sub>] and 20 equiv. Dipp-BDIAI (**2**)

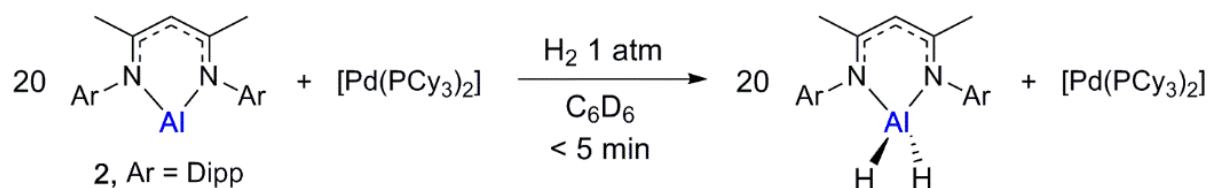

**2** (5.0 mg, 0.0113) was weighed into a small vial and C<sub>6</sub>D<sub>6</sub> (0.49 mL) was added. The solution was mixed to dissolve the solid to form a red solution. [Pd(PCy<sub>3</sub>)<sub>2</sub>] (56 μL, 0.01 M solution in C<sub>6</sub>D<sub>6</sub>, 0.00056 mmol) was added, the solution mixed and transferred to a Young's tap NMR tube. The tube was sealed and the NMR spectrum immediately recorded before H<sub>2</sub> addition. The tube was then degassed by the freeze/pump/thaw method (x 2) and H<sub>2</sub> (1 atm) was added immediately. Upon inversion the red/brown solution began to decolourise and after 30 seconds of mixing the solution had become pale yellow. The <sup>1</sup>H NMR spectrum (section 5.4.2) showed the product to be Dipp-BDIAIH<sub>2</sub> (**S1**).

### 2.6.3 Control Reaction of H<sub>2</sub> with Dipp-BDIAI (**2**)

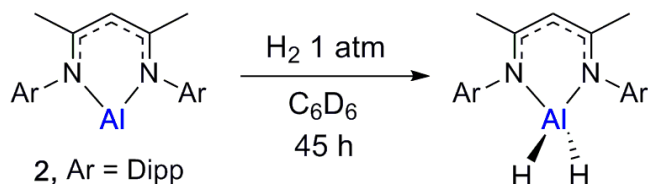

**2** (5.0 mg, 0.0113) was weighed into a small vial and C<sub>6</sub>D<sub>6</sub> (0.55 mL) was added. The solution was mixed to dissolve the solid to form a red solution. The solution was transferred to a Young's tap NMR tube. The tube was sealed and the NMR spectrum immediately recorded before H<sub>2</sub> addition. The tube was then degassed by the freeze/pump/thaw method (x 2) and H<sub>2</sub> (1 atm) was added immediately. Upon mixing by inversion no colour change of the red solution was observed. The NMR spectrum recorded immediately showed little reaction of **2** (section 5.4.3). The solution was monitored with Dipp-BDIAIH<sub>2</sub> (**S1**) forming as the major product slowly over time and full consumption of **2** reached after 45 h at 25 °C.

### 3. X-ray Crystallographic Data

**Table S1:** Crystal Data, Data Collection and Refinement Parameters for the structures of **Pd<sub>2</sub>Al<sub>2</sub>**, **PdAl<sub>2</sub>**, **3**, **4-o**

| Compound                                                    | <b>Pd<sub>2</sub>Al<sub>2</sub></b>                                                            | <b>PdAl<sub>2</sub></b>                                             | <b>3a</b>                                        |
|-------------------------------------------------------------|------------------------------------------------------------------------------------------------|---------------------------------------------------------------------|--------------------------------------------------|
| CCDC No.                                                    | 1829418                                                                                        | 1829419                                                             | 1829420                                          |
| Formula                                                     | C <sub>82</sub> H <sub>126</sub> Al <sub>2</sub> N <sub>4</sub> P <sub>2</sub> Pd <sub>2</sub> | C <sub>85</sub> H <sub>136</sub> Al <sub>2</sub> N <sub>4</sub> PPd | C <sub>35</sub> H <sub>47</sub> AlN <sub>2</sub> |
| <i>M</i>                                                    | 1496.56                                                                                        | 1405.30                                                             | 522.72                                           |
| Crystal System                                              | Triclinic                                                                                      | Triclinic                                                           | Orthorhombic                                     |
| Space group                                                 | <i>P</i> -1 (2)                                                                                | <i>P</i> -1 (2)                                                     | <i>Pnma</i> (62)                                 |
| <i>T</i> [K]                                                | 173(2)                                                                                         | 173(2)                                                              | 173(2)                                           |
| <i>a</i> [Å]                                                | 12.8924(6)                                                                                     | 13.2046(8)                                                          | 16.6858(14)                                      |
| <i>b</i> [Å]                                                | 13.4295(6)                                                                                     | 14.1589(11)                                                         | 20.950(2)                                        |
| <i>c</i> [Å]                                                | 13.7975(6)                                                                                     | 23.4405(11)                                                         | 9.0089(9)                                        |
| $\alpha$ [°]                                                | 110.488(4)                                                                                     | 94.720(5)                                                           | 90                                               |
| $\beta$ [°]                                                 | 112.313(4)                                                                                     | 98.247(4)                                                           | 90                                               |
| $\gamma$ [°]                                                | 100.712(4) <sup>o</sup>                                                                        | 108.643(6)                                                          | 90                                               |
| <i>V</i> [Å <sup>3</sup> ]                                  | 1925.07(16)                                                                                    | 4071.0(5)                                                           | 3149.1(5)                                        |
| <i>Z</i>                                                    | 1 <sup>5</sup>                                                                                 | 2                                                                   | 4                                                |
| Density [g cm <sup>-3</sup> ]                               | 1.291                                                                                          | 1.146                                                               | 1.103                                            |
| Radiation Used                                              | Mo-K $\alpha$                                                                                  | Mo-K $\alpha$                                                       | Mo-K $\alpha$                                    |
| $\mu$ (mm <sup>-1</sup> )                                   | 0.576                                                                                          | 0.313                                                               | 0.089                                            |
| $\theta$ range [°]                                          | 2.429 $\leq$ $\theta$ $\leq$ 28.286                                                            | 2.497 $\leq$ $\theta$ $\leq$ 28.248                                 | 2.441 $\leq$ $\theta$ $\leq$ 28.331              |
| Reflns collected                                            | 11174                                                                                          | 23629                                                               | 6552                                             |
| <i>R</i> <sub>int</sub>                                     | 0.0205                                                                                         | 0.0373                                                              | 0.0401                                           |
| Completeness (to $\theta = 25.242^\circ$ )                  | 98.5%                                                                                          | 98.8%                                                               | 99.1%                                            |
| No. of data/restr/param                                     | 7609 / 0 / 427                                                                                 | 16085/5/861                                                         | 6552/0/187                                       |
| <i>R</i> <sub>1</sub> [ <i>I</i> > 2 $\sigma$ ( <i>I</i> )] | 0.0350                                                                                         | 0.0679                                                              | 0.0479                                           |
| <i>wR</i> <sub>2</sub> [all data]                           | 0.0775                                                                                         | 0.1662                                                              | 0.1371                                           |
| <i>GoF</i>                                                  | 1.046                                                                                          | 1.044                                                               | 0.699                                            |
| Largest diff. pk and hole [eÅ <sup>-3</sup> ]               | 0.377, -0.369                                                                                  | 1.053, -1.087                                                       | 0.480, -0.477                                    |

<sup>5</sup> The value of *Z* = 1 is due to the complex having crystallographic C<sub>i</sub> symmetry.

**Table S1 cont:** Crystal Data, Data Collection and Refinement Parameters for the structures of **Pd<sub>2</sub>Al<sub>2</sub>, PdAl<sub>2</sub>, 3, 4o**

|                                                             |                                                                      |
|-------------------------------------------------------------|----------------------------------------------------------------------|
| Compound                                                    | <b>4-o</b>                                                           |
| CCDC No.                                                    | 1829421                                                              |
| Formula                                                     | C <sub>36</sub> H <sub>48.9</sub> AlCl <sub>0.1</sub> N <sub>2</sub> |
| <i>M</i>                                                    | 540.19                                                               |
| Crystal System                                              | Monoclinic                                                           |
| Space group                                                 | <i>P2<sub>1</sub>/c<sub>1</sub></i> (14)                             |
| <i>T</i> [K]                                                | 173(2)                                                               |
| <i>a</i> [Å]                                                | 12.0860(4)                                                           |
| <i>b</i> [Å]                                                | 22.1931(7)                                                           |
| <i>c</i> [Å]                                                | 12.9055(4)                                                           |
| $\alpha$ [°]                                                | 90                                                                   |
| $\beta$ [°]                                                 | 106.077(4)                                                           |
| $\gamma$ [°]                                                | 90                                                                   |
| <i>V</i> [Å <sup>3</sup> ]                                  | 3326.2(2)                                                            |
| <i>Z</i>                                                    | 4                                                                    |
| Density [g cm <sup>-3</sup> ]                               | 1.079                                                                |
| Radiation Used                                              | Mo-K $\alpha$                                                        |
| $\mu$ (mm <sup>-1</sup> )                                   | 0.094                                                                |
| $\theta$ range [deg]                                        | 2.539 $\leq$ $\theta$ $\leq$<br>28.215                               |
| Reflns collected                                            | 11620                                                                |
| <i>R</i> <sub>int</sub>                                     | 0.0486                                                               |
| Completeness (to $\theta = 25.242^\circ$ )                  | 98.7%                                                                |
| No. of data/restr/param                                     | 6657/7/376                                                           |
| <i>R</i> <sub>1</sub> [ <i>I</i> > 2 $\sigma$ ( <i>I</i> )] | 0.0589                                                               |
| <i>wR</i> <sub>2</sub> [all data]                           | 0.1540                                                               |
| <i>GoF</i>                                                  | 1.099                                                                |
| Largest diff. pk and hole [eÅ <sup>-3</sup> ]               | 0.459, -0.242                                                        |

Table S1 provides a summary of the crystallographic data for the structures of **Pd<sub>2</sub>Al<sub>2</sub>, PdAl<sub>2</sub>, 3, 4o**. Data were collected using an Agilent Xcalibur 3 E diffractometer, and the structures were refined using the SHELXTL and SHELX-2014 program systems.<sup>6</sup>

<sup>6</sup> SHELXTL v5.1, Bruker AXS, Madison, WI, 1998. SHELX-2014, G.M. Sheldrick, *Acta Cryst.*, 2015, **C71**, 3-8.

### The X-ray crystal structure of $\text{Pd}_2\text{Al}_2$

The structure of  $\text{Pd}_2\text{Al}_2$  was found to sit across a centre of symmetry at the middle of the  $\text{Pd}_2\text{Al}_2$  ring. The unique Al–H–Pd bridging hydrogen atom was located from a  $\Delta F$  map and refined freely.

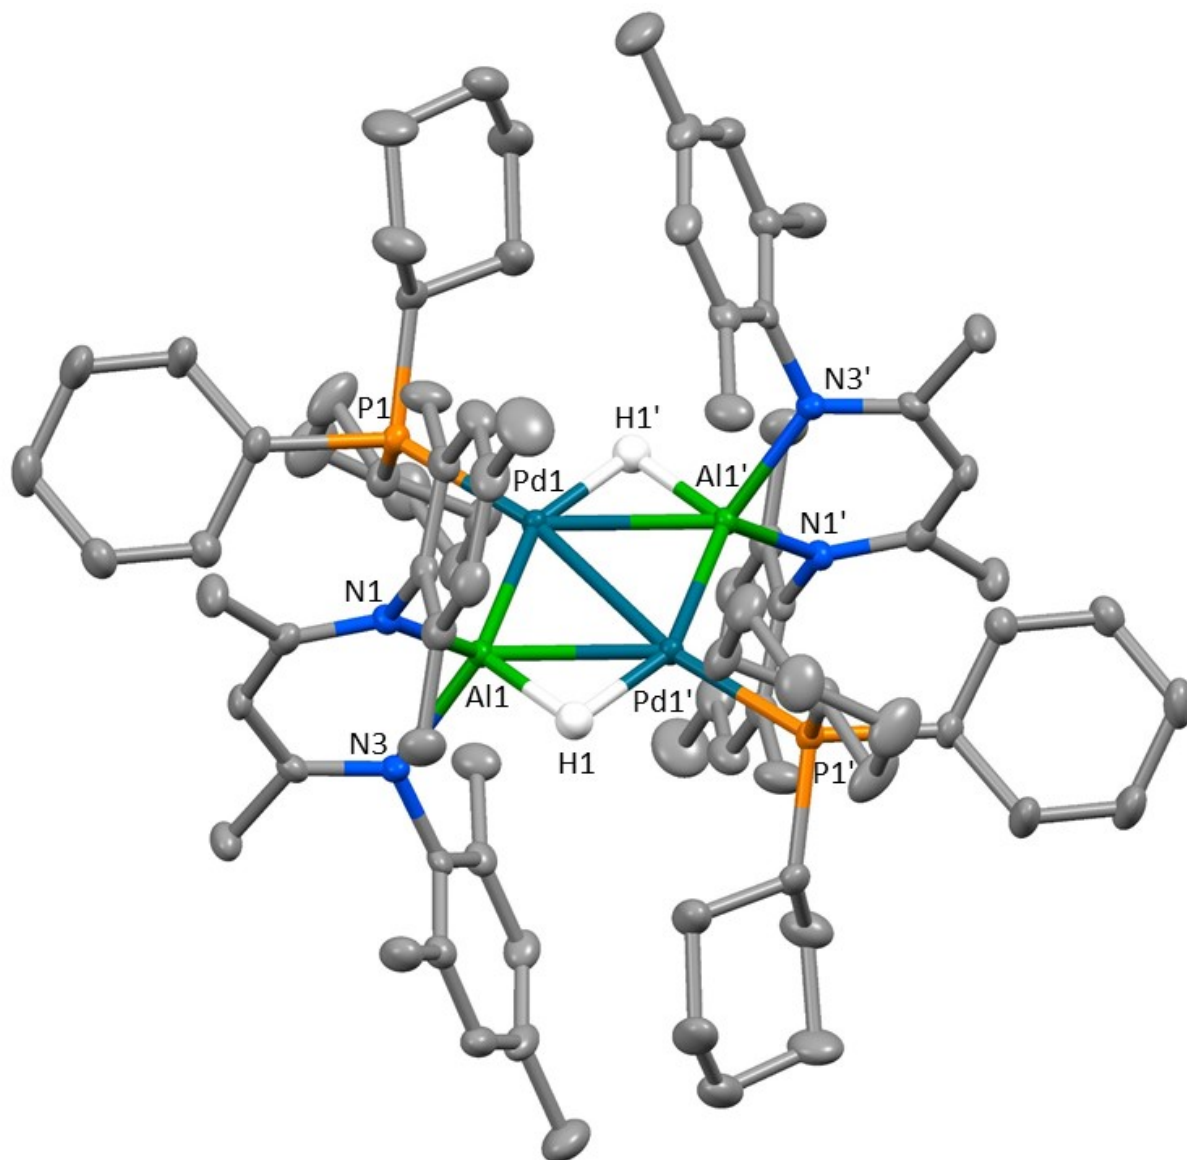

**Figure S1:** The crystal structure of  $\text{Pd}_2\text{Al}_2$  (50% probability ellipsoids). Selected hydrogen atoms omitted for clarity.

### The X-ray crystal structure of PdAl<sub>2</sub>

The data collected for PdAl<sub>2</sub> suggested the possibility of crystal twinning. Attempts were made to resolve and model the twinning but the results proved less satisfactory than treating the data as not twinned. The result of this poor data quality is a slightly large  $R_1$  value (0.0679). This also resulted in residual electron density close to the Pd atom. The unit cell was found to contain 3 molecules of *n*-hexane solvent of crystallisation.

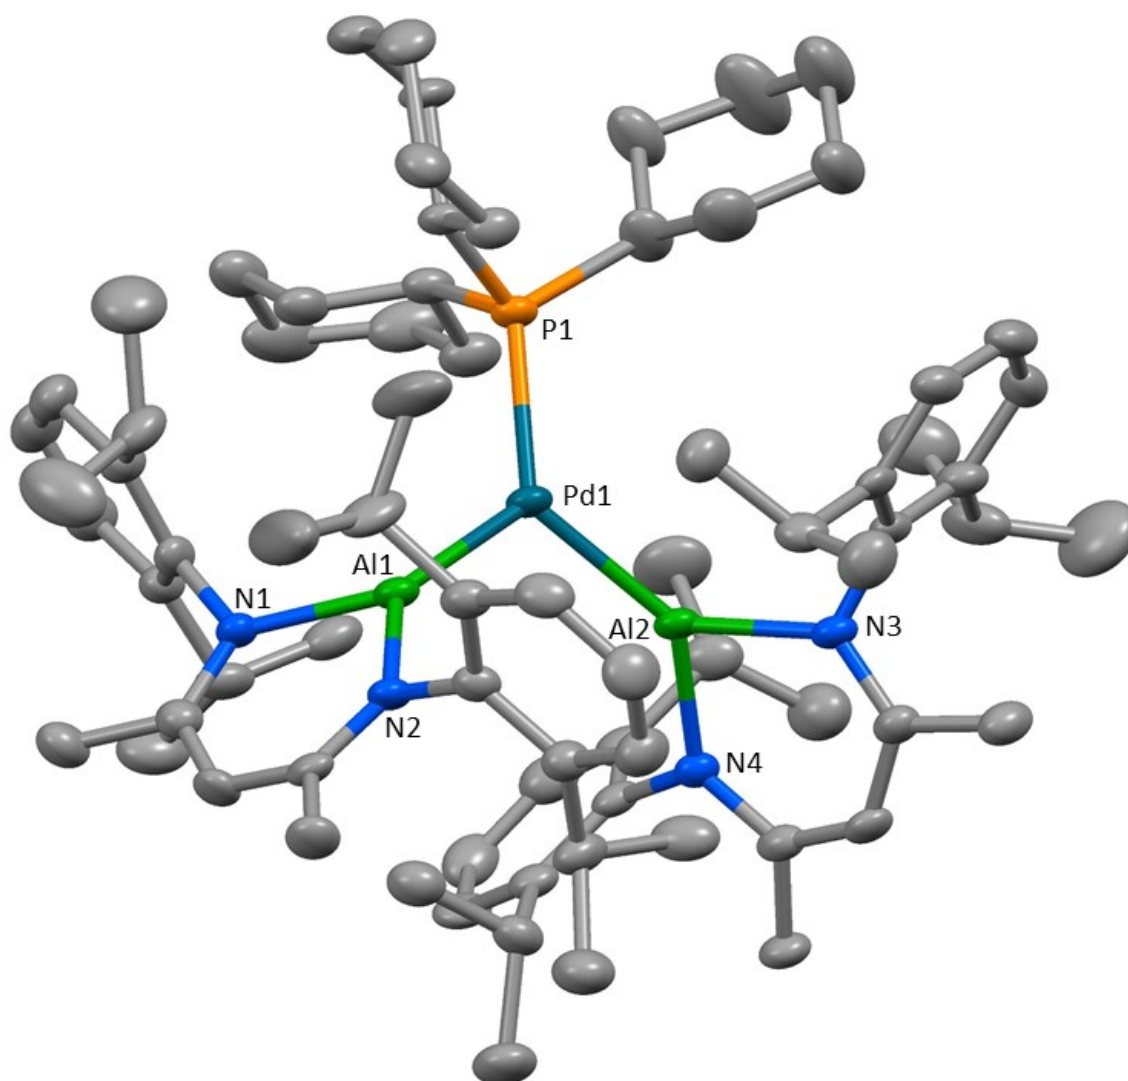

**Figure S2:** The crystal structure of PdAl<sub>2</sub> (50% probability ellipsoids). Hydrogen atoms and solvent of crystallization omitted for clarity.

### The X-ray crystal structure of **3a**

The data collected for **3a** suggested the possibility of crystal twinning. The structure was refined as a 2 component twin with a ratio of 56:44. The molecule sits on a mirror plane which lies in the plane of Al and bisects the supporting ligand and the Al-bound phenyl group. The Al–H hydrogen atom in the structure of **3a** was located from a  $\Delta F$  map and refined freely.

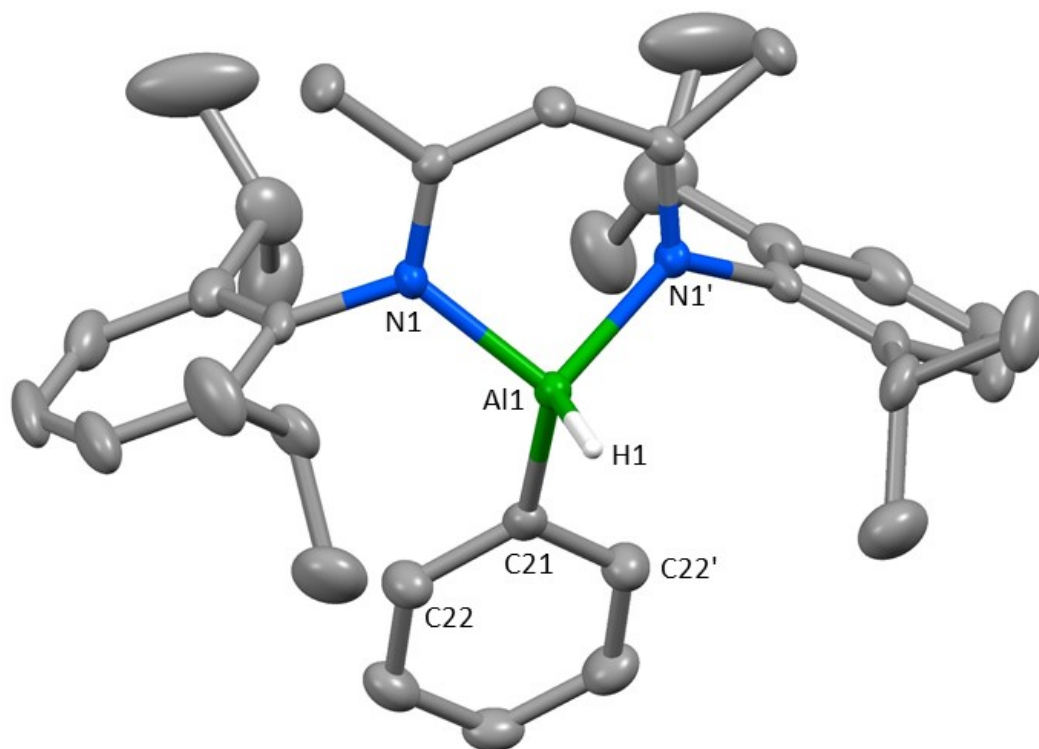

**Figure S3:** The crystal structure of **3a** (50% probability ellipsoids). Selected hydrogen atoms omitted for clarity.

### The X-ray crystal structure of 4-o

The data for **4-o** showed more electron density adjacent to the Al centre than caused by a hydride ligand. The likely explanation was a partial occupancy chloride (contained in the starting materials for **4-o**) which was modelled at 10% occupancy with 90% occupancy of the hydride. This co-crystallisation of aryl-aluminium hydrides with aryl-aluminium halides has been observed previously in X-ray structures (and supported by NMR spectroscopy) and was modelled in the same way here.<sup>7</sup> The position and thermal parameters of the hydride were modelled using the DFIX and SIMU commands.

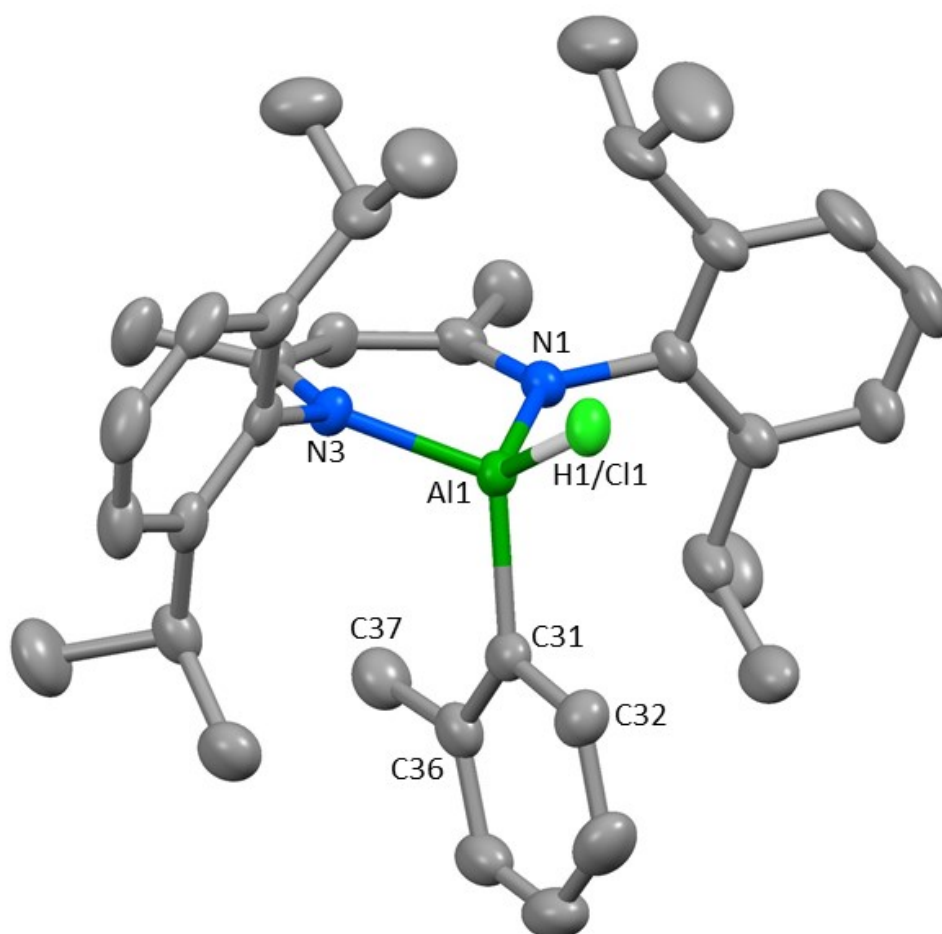

**Figure S4:** The crystal structure of **4-o** (50% probability ellipsoids). Selected hydrogen atoms omitted for clarity.

<sup>7</sup> S. Yow, S. J Gates, A. J. P. White. M. R. Crimmin, *Angew. Chem., Int. Ed.* **2012**, *51*, 12599.  
S-23

## 4. Kinetics Studies by NMR Spectroscopy

### 4.1 Kinetic Isotope Effect of Palladium Catalysed C–H Almination of Benzene

#### Experimental Procedure

**2** (5.0 mg, 0.0113 mmol) was weighed into a vial and dissolved in either C<sub>6</sub>H<sub>6</sub> or C<sub>6</sub>D<sub>6</sub> (437 μL). A solution of [Pd(PCy<sub>3</sub>)<sub>2</sub>] (113 μL, 0.01 M solution in C<sub>6</sub>H<sub>6</sub> or C<sub>6</sub>D<sub>6</sub>, 0.00113 mmol, 10 mol%) was added. The solution was mixed and transferred to a Young's NMR tube containing a capillary insert standard (ferrocene in C<sub>6</sub>D<sub>6</sub>). The tube was sealed, removed from the glove box and cooled in ice while transported directly to the NMR spectrometer. The sample was warmed to room temperature and loaded into the spectrometer pre-set at 30 °C. The sample was locked and shimmed and the first <sup>1</sup>H NMR spectrum recorded ~5 min after mixing.

A plot of [**2**] (determined from initial concentration and integration against internal standard) vs time for both reactions using C<sub>6</sub>H<sub>6</sub> or C<sub>6</sub>D<sub>6</sub> showed a straight line (figure S5) indicating the reaction is (pseudo)-zero order in [**2**]. Standard errors were calculated by use of the regression analysis calculation in Microsoft Excel software. The rate constant for the C<sub>6</sub>H<sub>6</sub> reaction was found to be  $k_{\text{C-H}} = 4.86 \times 10^{-6} (\pm 1.09 \times 10^{-7}) \text{ mol dm}^{-3} \text{ s}^{-1}$  and  $k_{\text{C-D}} = 8.43 \times 10^{-7} (\pm 4.13 \times 10^{-9}) \text{ mol dm}^{-3} \text{ s}^{-1}$  for C<sub>6</sub>D<sub>6</sub>. This gave a KIE of 5.8 (± 0.1) for the reaction indicative of a strong primary KIE. While this value is large for a KIE in comparison to many in the literature,<sup>8</sup> the maximum value for  $k_{\text{H}}/k_{\text{D}}$  is estimated to be 6.5-7.0 at 298 K<sup>9</sup> and is consistent with the proposed mechanism in which the oxidative addition of the C–H bond is the highest transition state.

<sup>8</sup> E.M. Simmons and J.F. Hartwig, *Angew. Chem. Int. Ed.*, **2012**, *51*, 3066.

<sup>9</sup> M. Gómez-Gallego and M.A. Sierra, *Chem. Rev.*, **2011**, *111*, 4857.



**Figure S5.** Kinetic study of the C–H vs C–D alumination reaction.

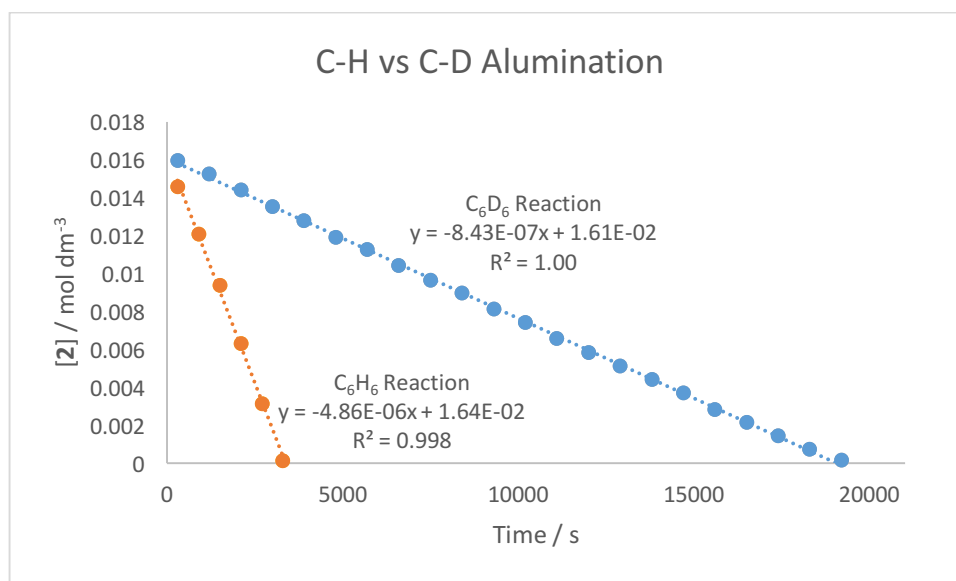

## 4.2 Eyring Analysis of Benzene C–H Alumination

### Experimental Procedure

**2** (437  $\mu\text{L}$ , 0.0258 M solution in  $\text{C}_6\text{H}_6$ , 0.0113 mmol) was mixed with a solution of  $[\text{Pd}(\text{PCy}_3)_2]$  (113  $\mu\text{L}$ , 0.01 M solution in  $\text{C}_6\text{H}_6$ , 0.00113 mmol, 10 mol%). The solution was rapidly transferred to a Young's NMR tube containing a capillary insert standard (ferrocene in  $\text{C}_6\text{D}_6$ ). The tube was sealed, removed from the glove box and cooled in ice while transported directly to the NMR spectrometer. The sample was warmed to room temperature and loaded into the spectrometer pre-set at the required temperature. The sample was locked and shimmed and the first  $^1\text{H}$  NMR spectrum recorded  $\sim 5$  min after mixing.

A plot of **[2]** (determined from initial concentration and integration against internal standard) vs time for the reactions at different temperatures showed a straight lines (figure S6) indicating the reaction is (pseudo)-zero order in **[2]**. The rate constants were calculated and a plot of  $\ln k$  vs  $1/T$  (figure S7) allowed calculation of the thermodynamic parameters using the Eyring equation. Standard errors were calculated by use of the regression analysis calculation in Microsoft Excel software. The enthalpy of activation was found to be  $\Delta H^\ddagger = 23.4 (\pm 1.3)$  kcal  $\text{mol}^{-1}$  and the entropy of activation  $\Delta S^\ddagger = -5.7 (\pm 4.5)$  cal  $\text{K}^{-1} \text{mol}^{-1}$ . This gave a value for the Gibbs free energy of activation of  $\Delta G^\ddagger_{298\text{K}} = 25.1 (\pm 2.6)$  kcal  $\text{mol}^{-1}$ .

**Figure S6.** Kinetic study of the C–H almination reaction at a range of temperatures.

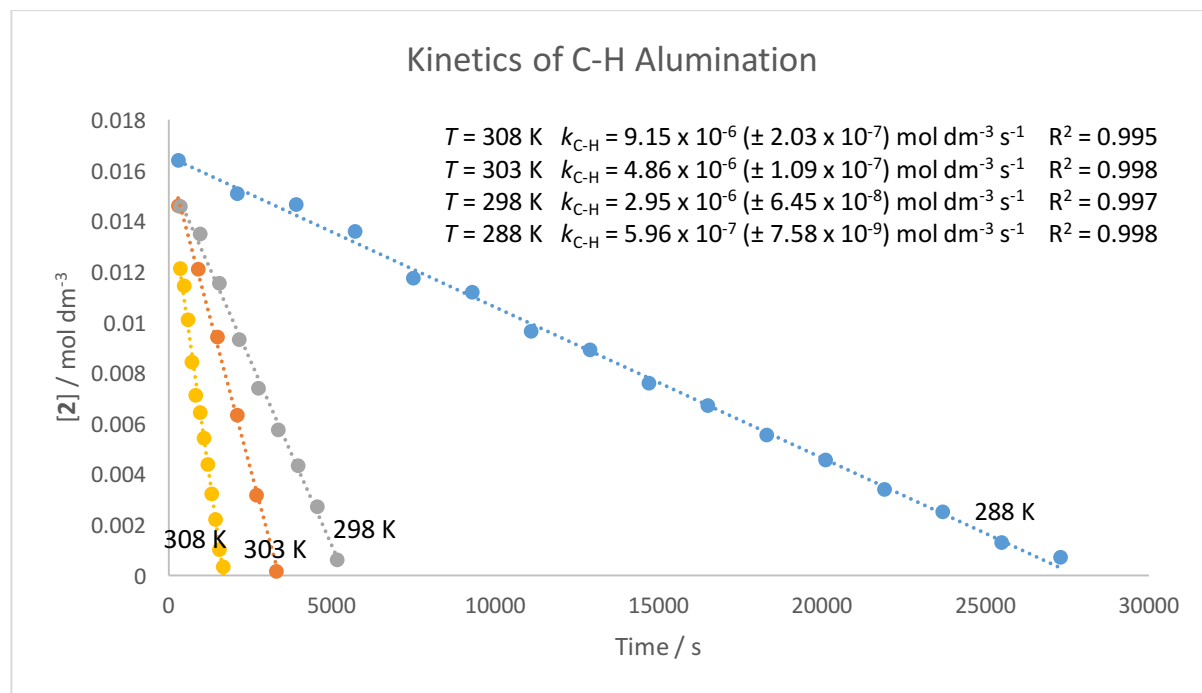

**Figure S7.** Eyring Plot of C–H almination reaction.

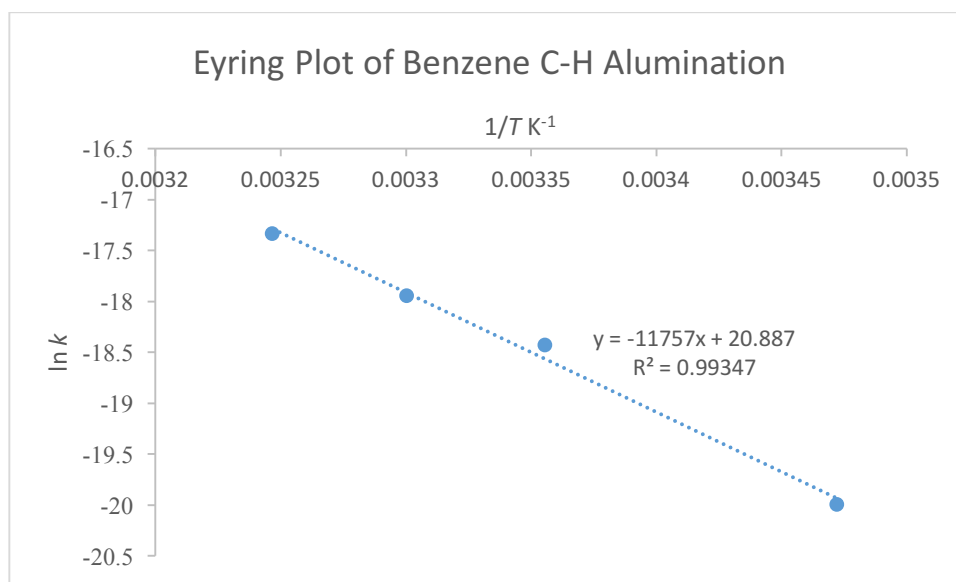

## 5. Multinuclear NMR Data

### 5.1 NMR Spectra of Heterometallic Products

#### 5.1.1 NMR Spectrum of Reaction Mixture of Pd<sub>2</sub>Al<sub>2</sub>

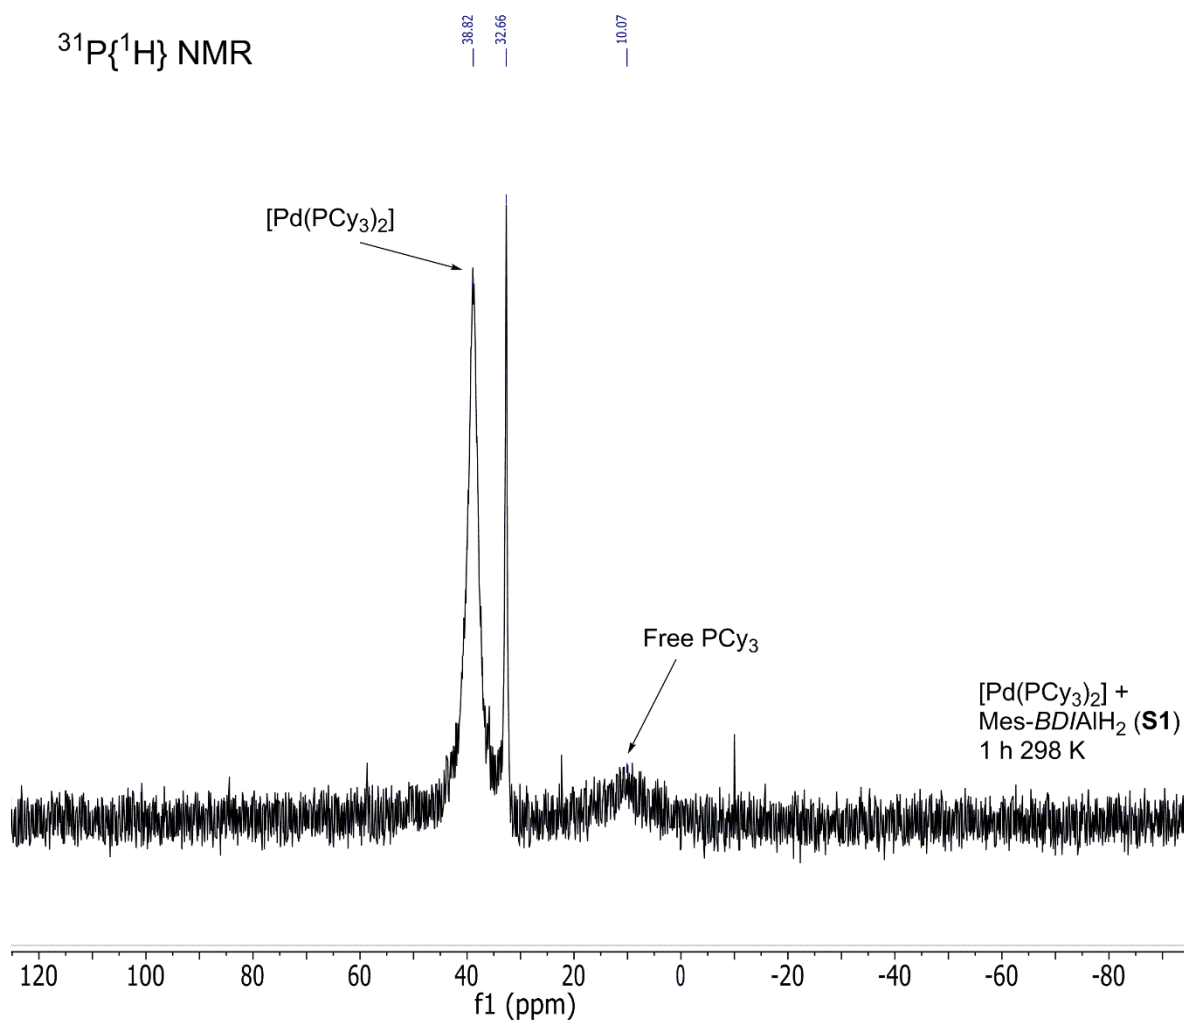

**Figure S8.** <sup>31</sup>P{<sup>1</sup>H} NMR spectrum of the reaction mixture of [Pd(PCy<sub>3</sub>)<sub>2</sub>] with Mes-BDIAIH<sub>2</sub> (S1) in C<sub>6</sub>D<sub>6</sub> after 1 h at 298 K and before precipitation of Pd<sub>2</sub>Al<sub>2</sub>. Broadened signals for [Pd(PCy<sub>3</sub>)<sub>2</sub>] and PCy<sub>3</sub> are observed suggesting a dynamic process in solution.

### 5.1.2 NMR Spectra of Pure PdAl<sub>2</sub> at 298 K in d<sub>8</sub>-toluene

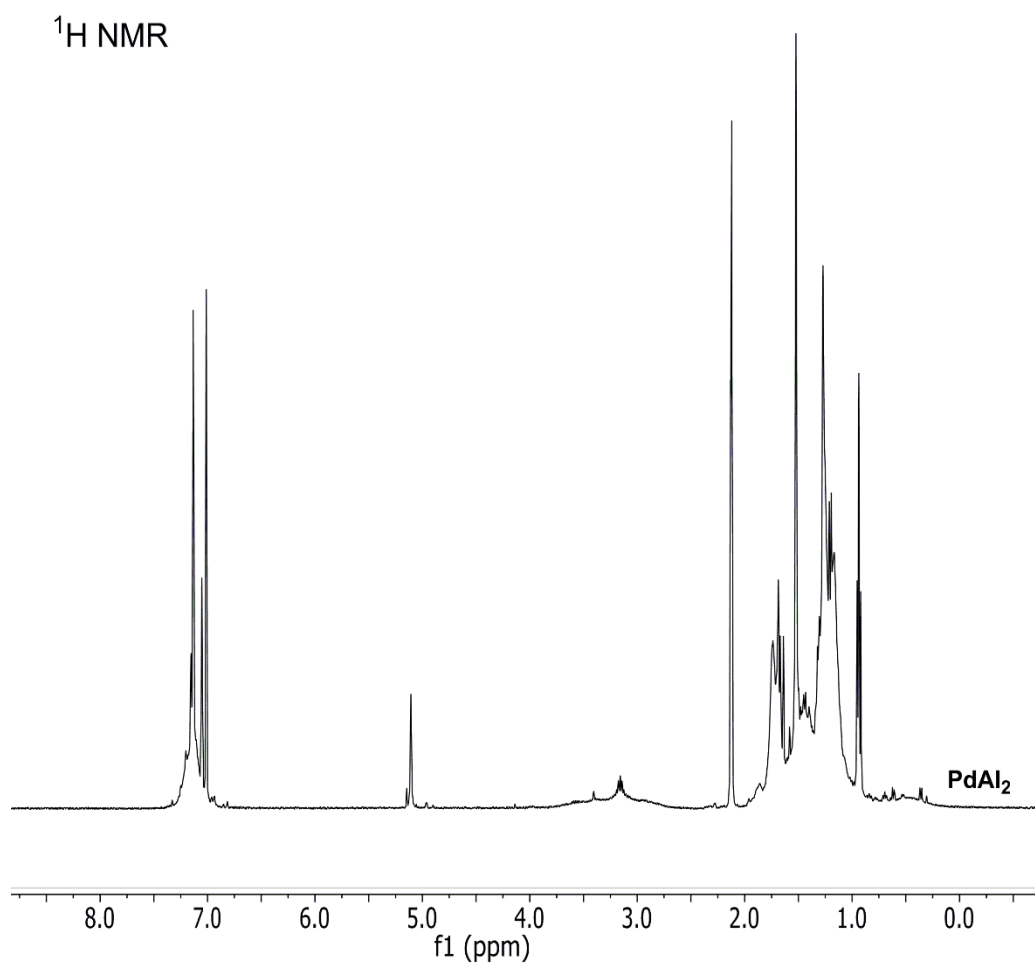

**Figure S9.** <sup>1</sup>H NMR spectrum of a pure sample of PdAl<sub>2</sub> in d<sub>8</sub>-toluene at 298 K showing a dynamic process in solution.

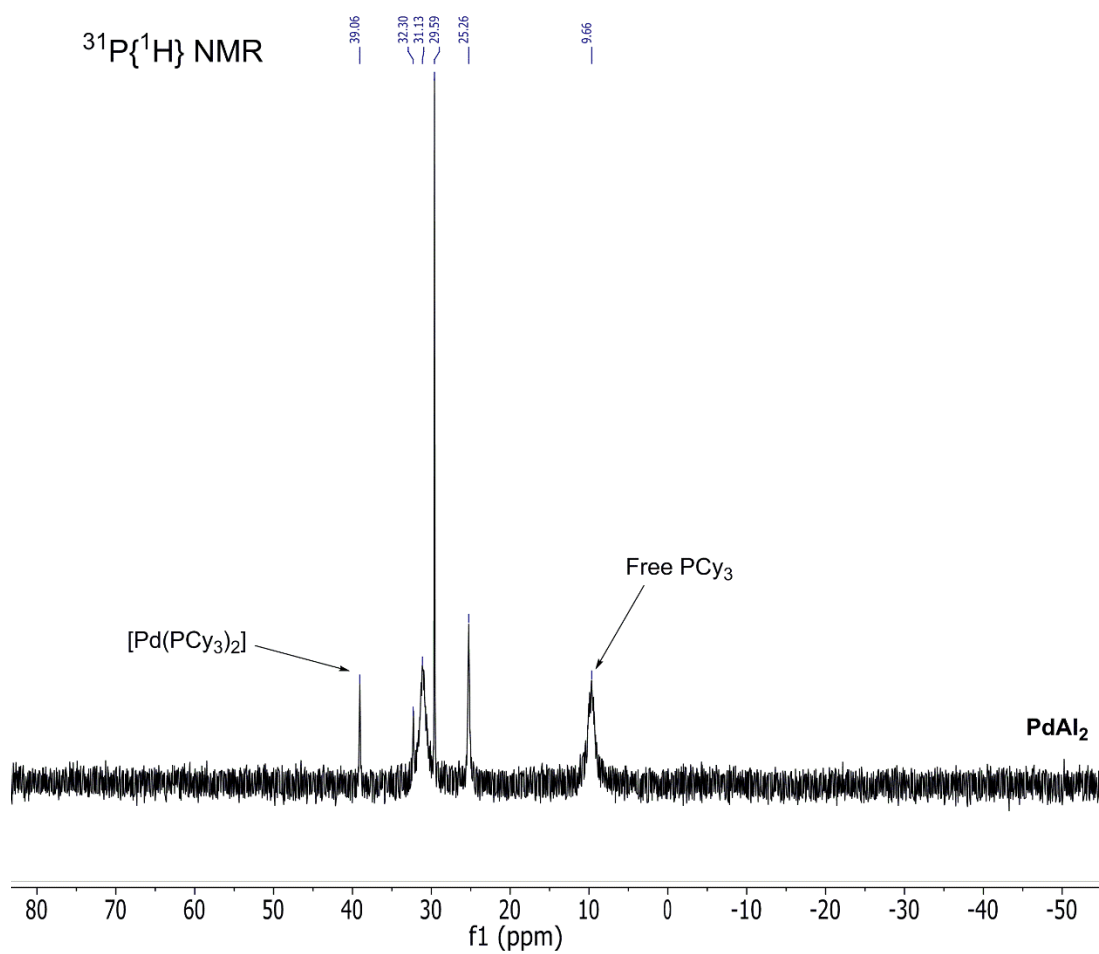

**Figure S10.**  $^{31}\text{P}\{^1\text{H}\}$  NMR spectrum of a pure sample of **PdAl<sub>2</sub>** in  $d_8$ -toluene at 298 K showing a dynamic process in solution.

### 5.1.3 NMR Spectra of PdAl<sub>2</sub> + 1 equiv. of 2 at 233 K in d<sub>8</sub>-toluene

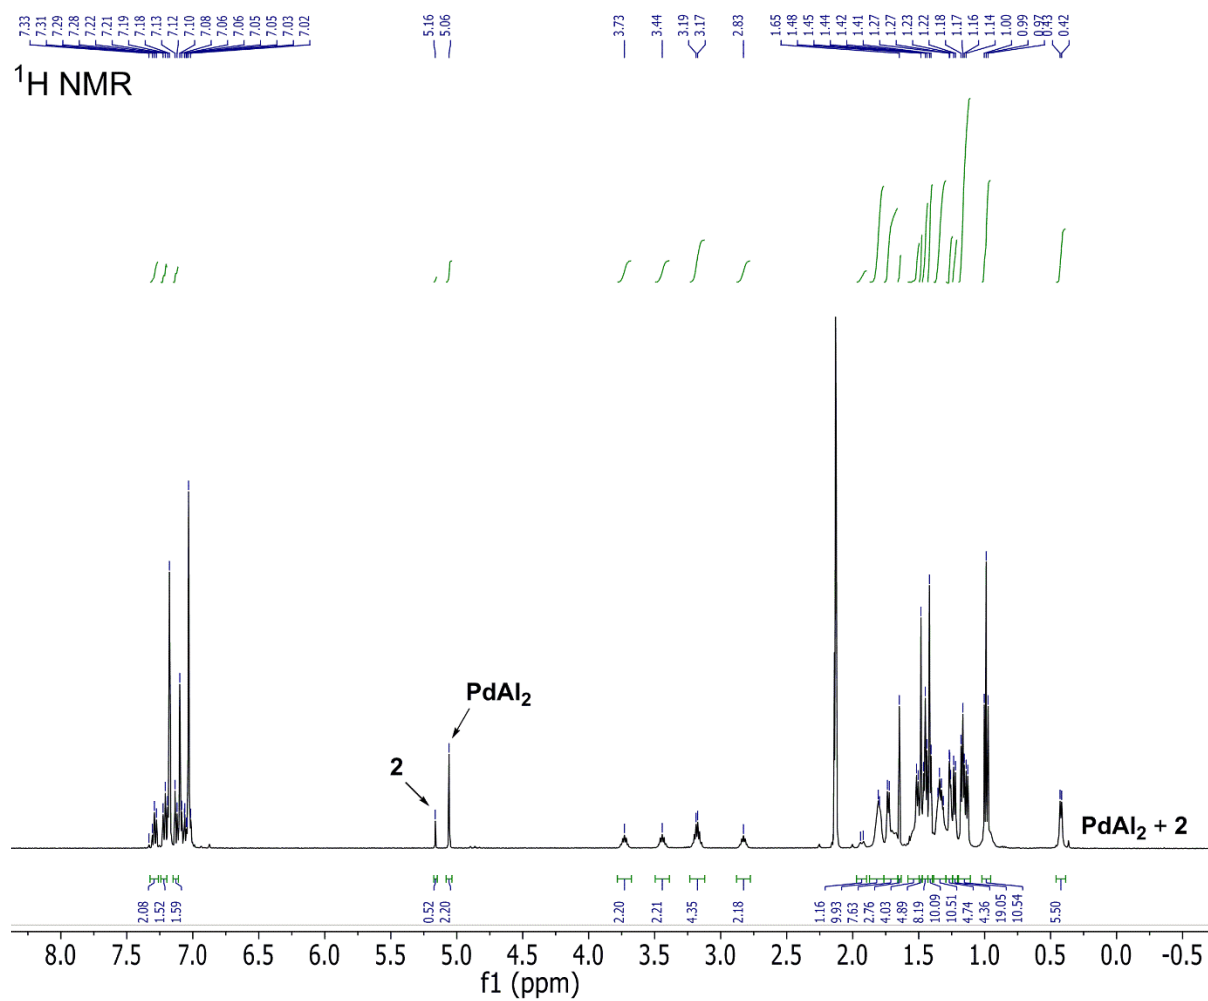

**Figure S11.** <sup>1</sup>H NMR spectrum of a sample of PdAl<sub>2</sub> with 1 equiv. of 2 in d<sub>8</sub>-toluene at 233 K.

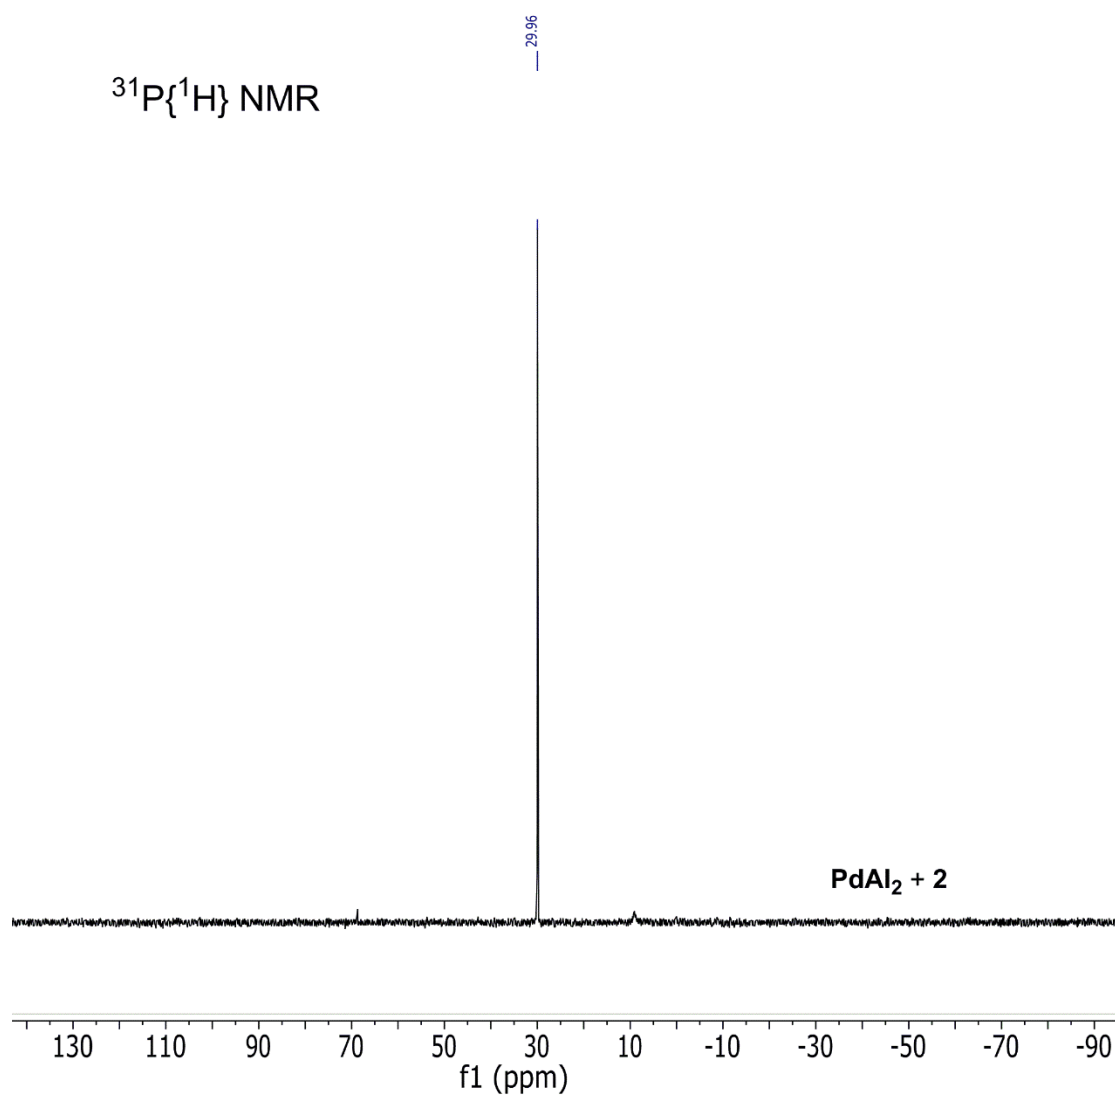

**Figure S12.**  $^{31}\text{P}\{^1\text{H}\}$  NMR spectrum of a sample of  $\text{PdAl}_2$  with 1 equiv. of **2** in  $d_8$ -toluene at 233 K.

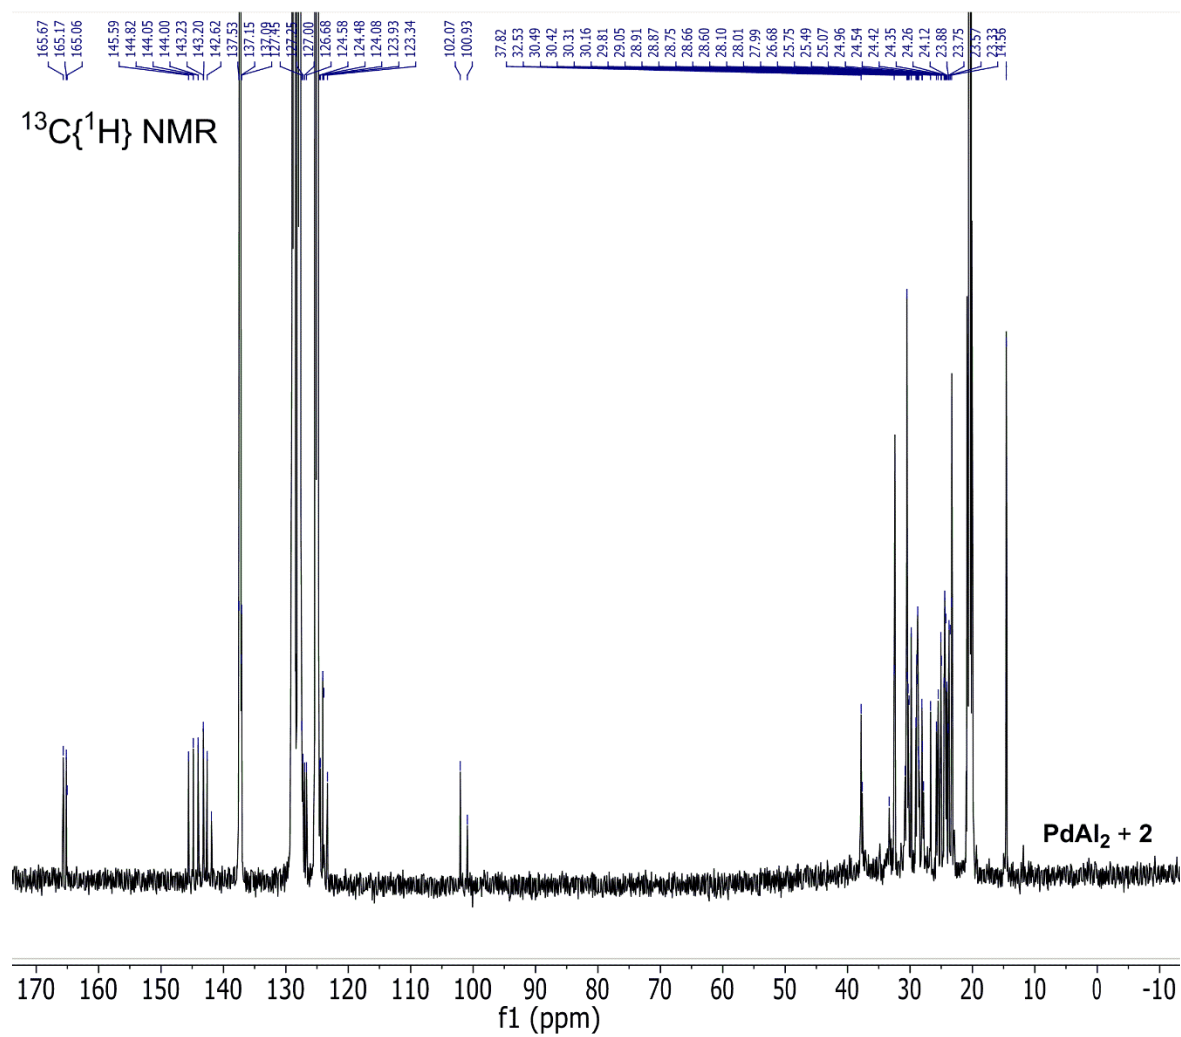

**Figure S13.**  $^{13}\text{C}\{^1\text{H}\}$  NMR spectrum of a sample of **PdAl<sub>2</sub>** with 1 equiv. of **2** in  $d_8$ -toluene at 233 K.



## 5.2 Stacked Plots Comparing $^1\text{H}$ NMR Spectra of Aluminated Products Synthesised Catalytically and Non-Catalytically

### 5.2.1 $^1\text{H}$ NMR Spectra of 3a

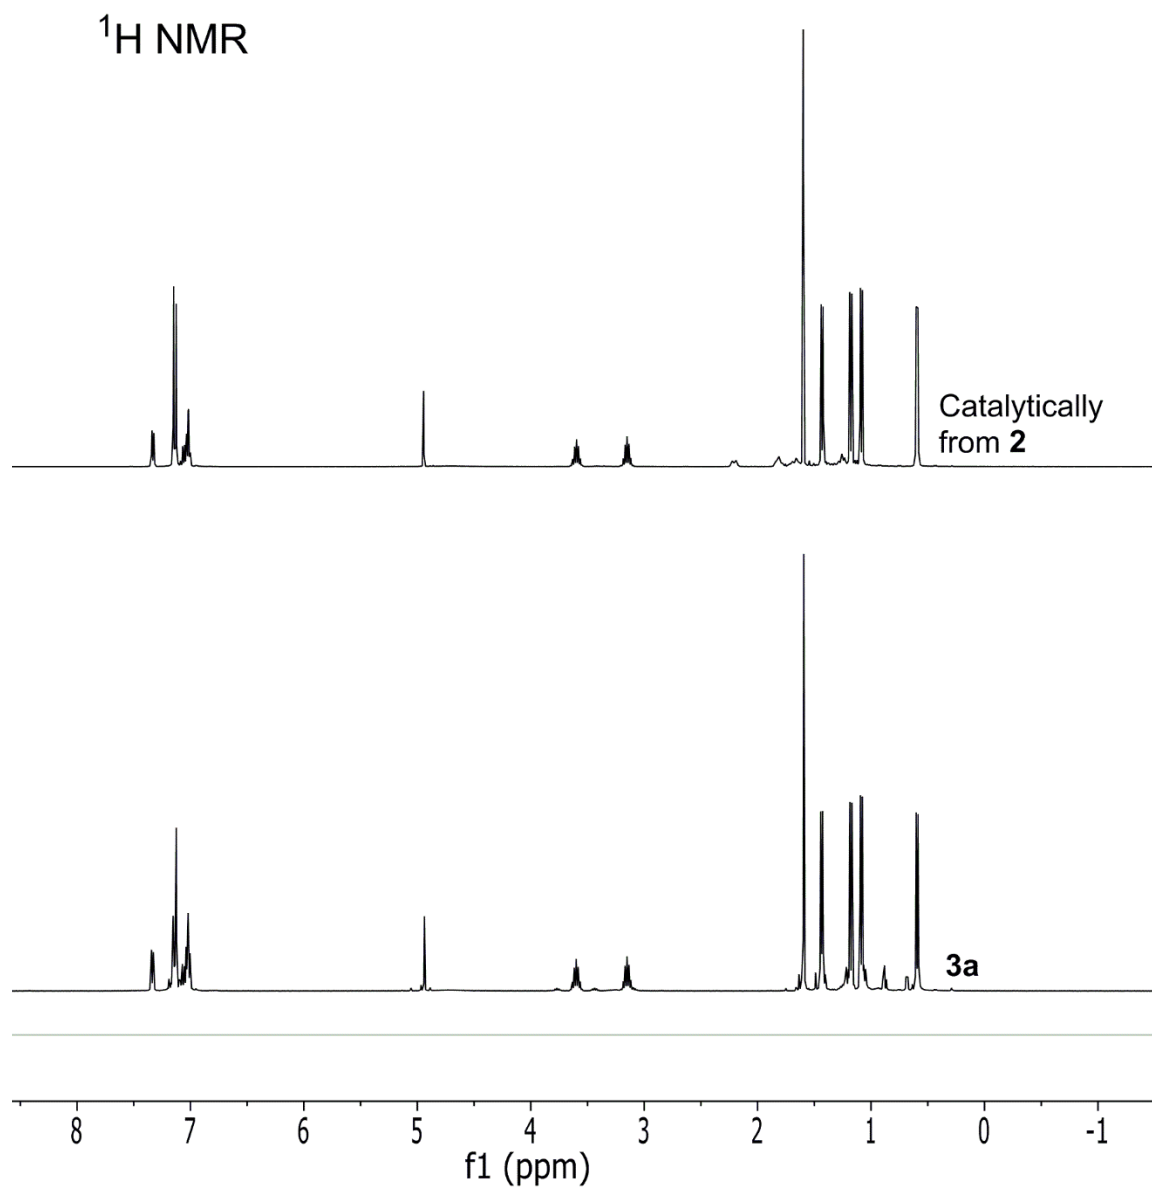

**Figure S14.**  $^1\text{H}$  NMR spectra of **3a** catalytically generated from **2** and isolated sample of **3a**, synthesised non-catalytically.

## 5.2.2 $^1\text{H}$ NMR Spectra of 4-o, 4-m and 4-p

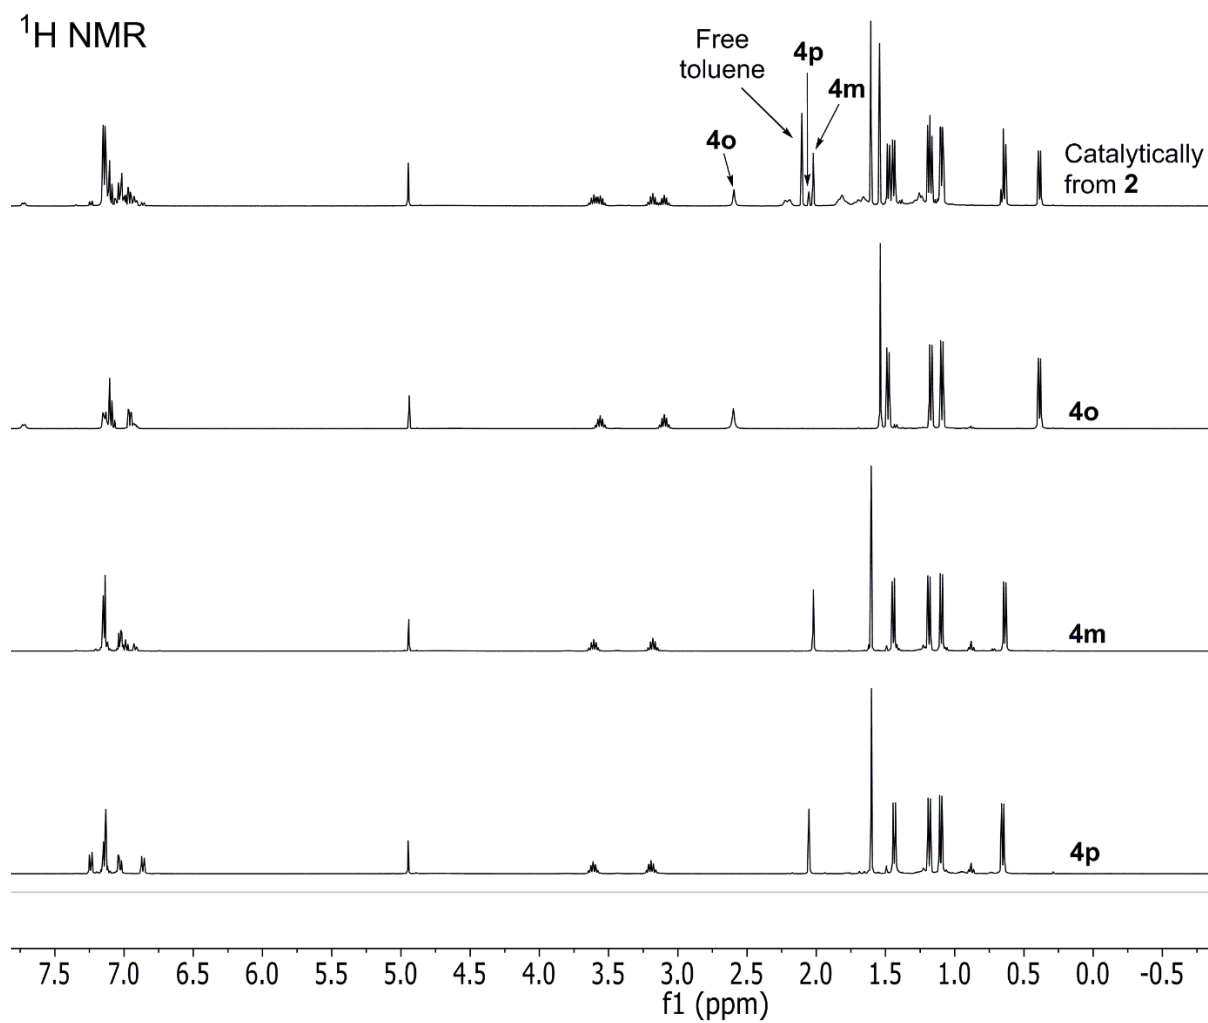

**Figure S15.**  $^1\text{H}$  NMR spectra of the mixture of regioisomers catalytically generated from **2** and isolated samples of **4-o**, **4-m** and **4-p** synthesised non-catalytically.

### 5.2.3 $^1\text{H}$ NMR Spectra of **6-o** and **6-m**

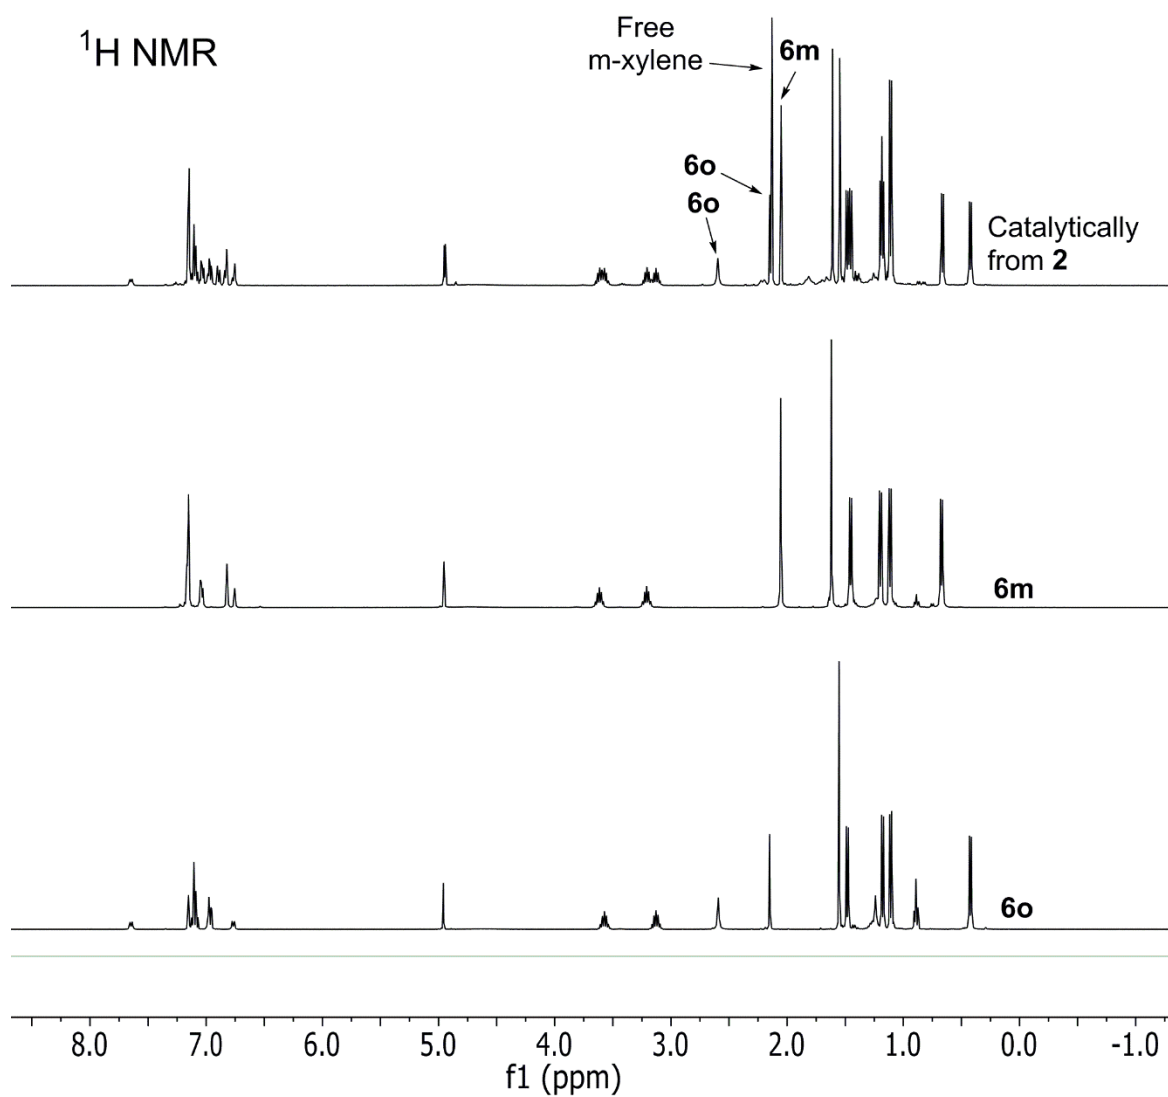

**Figure S16.**  $^1\text{H}$  NMR spectra of the mixture of regioisomers catalytically generated from **2** and isolated samples of **6-o** and **6-m** synthesised non-catalytically.

### 5.2.4 $^1\text{H}$ NMR Spectra of 7-o and 7-m

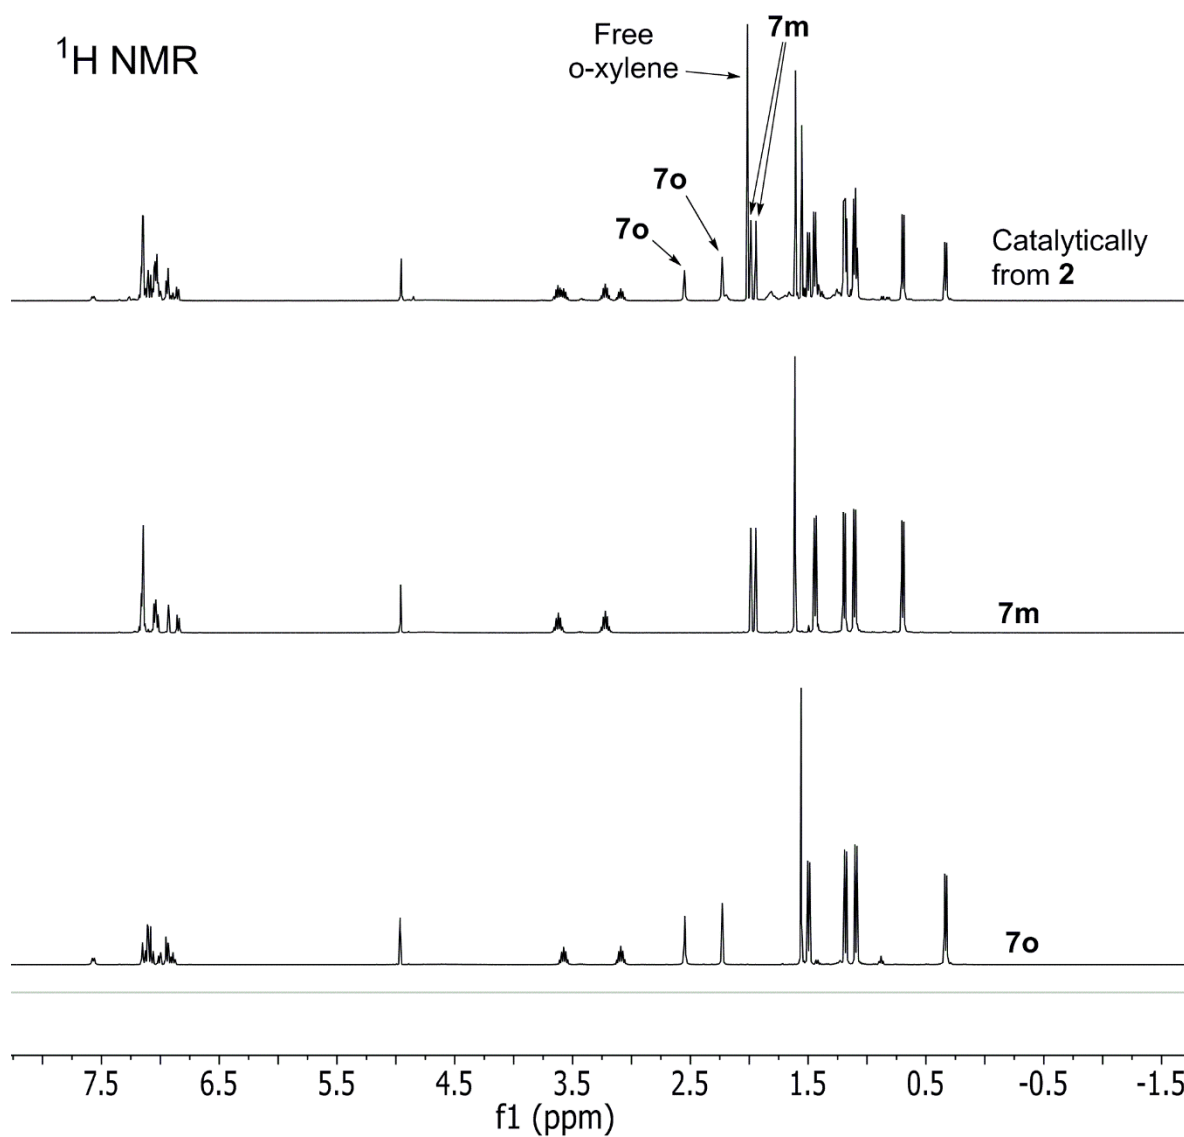

**Figure S17.**  $^1\text{H}$  NMR spectra of the mixture of regioisomers catalytically generated from **2** and isolated samples of **7-o** and **7-m** synthesised non-catalytically.

### 5.2.5 $^1\text{H}$ NMR Spectra of **8-m** and **8-p**

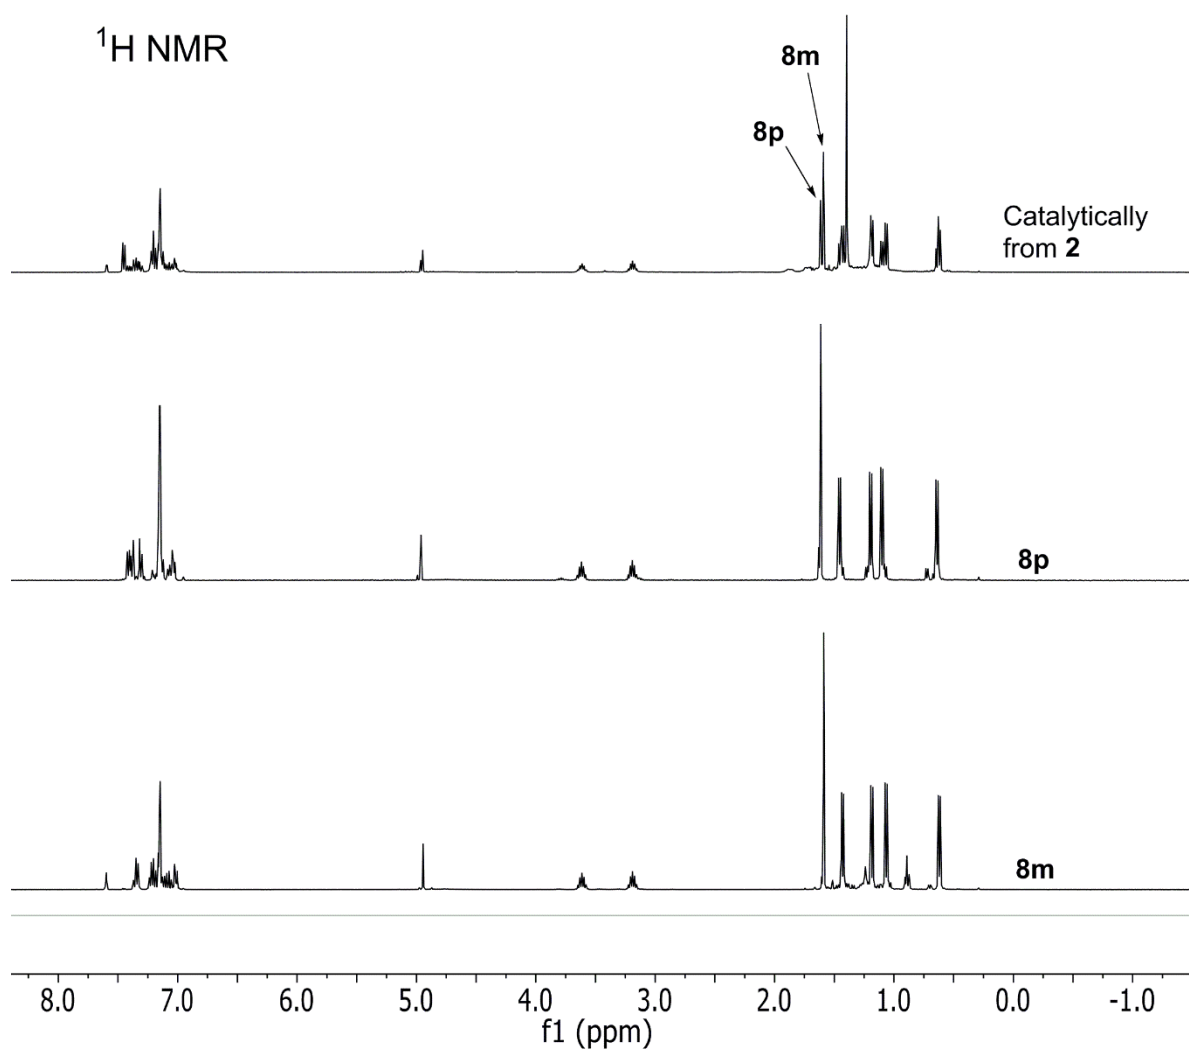

**Figure S18.**  $^1\text{H}$  NMR spectra of the mixture of regioisomers catalytically generated from **2** and isolated samples of **8-p** and **8-m** synthesised non-catalytically.

## 5.3 C–H Almination of Toluene Using a Phosphine Free Catalyst

### 5.3.1 $^1\text{H}$ NMR Spectra of Toluene Almination Using Different Pd Catalysts

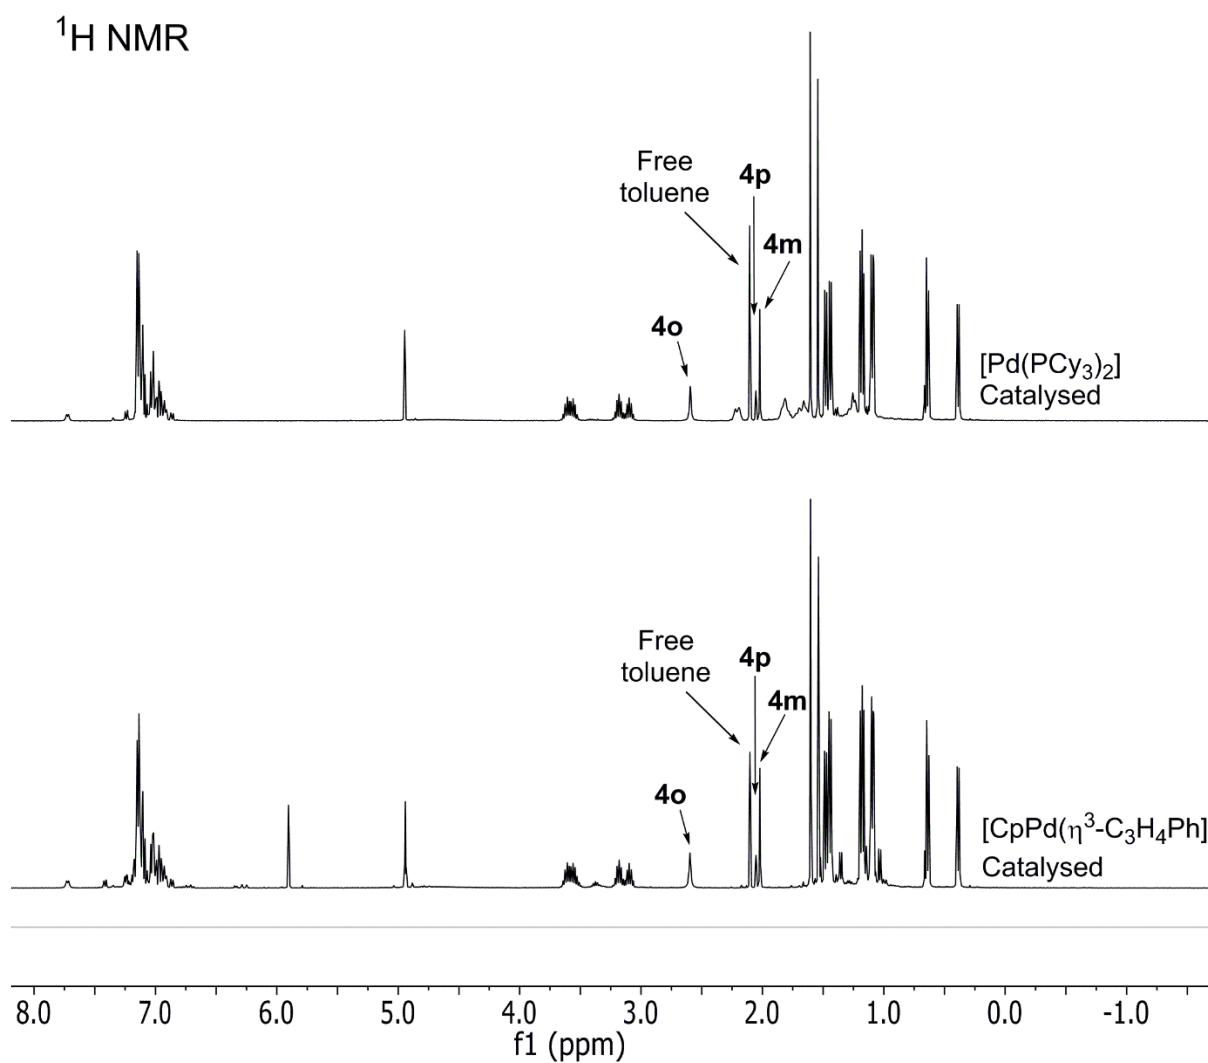

**Figure S19.**  $^1\text{H}$  NMR spectra of the products (**4-o**, **4-m** and **4-p**) of C–H almination of toluene from **2** using [Pd(PCy<sub>3</sub>)<sub>2</sub>] and [CpPd( $\eta^3$ -C<sub>3</sub>H<sub>4</sub>Ph)] as catalysts.

## 5.4 Palladium Catalysed Reactivity of Dipp-BDIAI (**2**) with H<sub>2</sub>

### 5.4.1 NMR Spectra of Reaction of H<sub>2</sub> with [Pd(PCy<sub>3</sub>)<sub>2</sub>] and 2 equiv. Dipp-BDIAI (**2**)

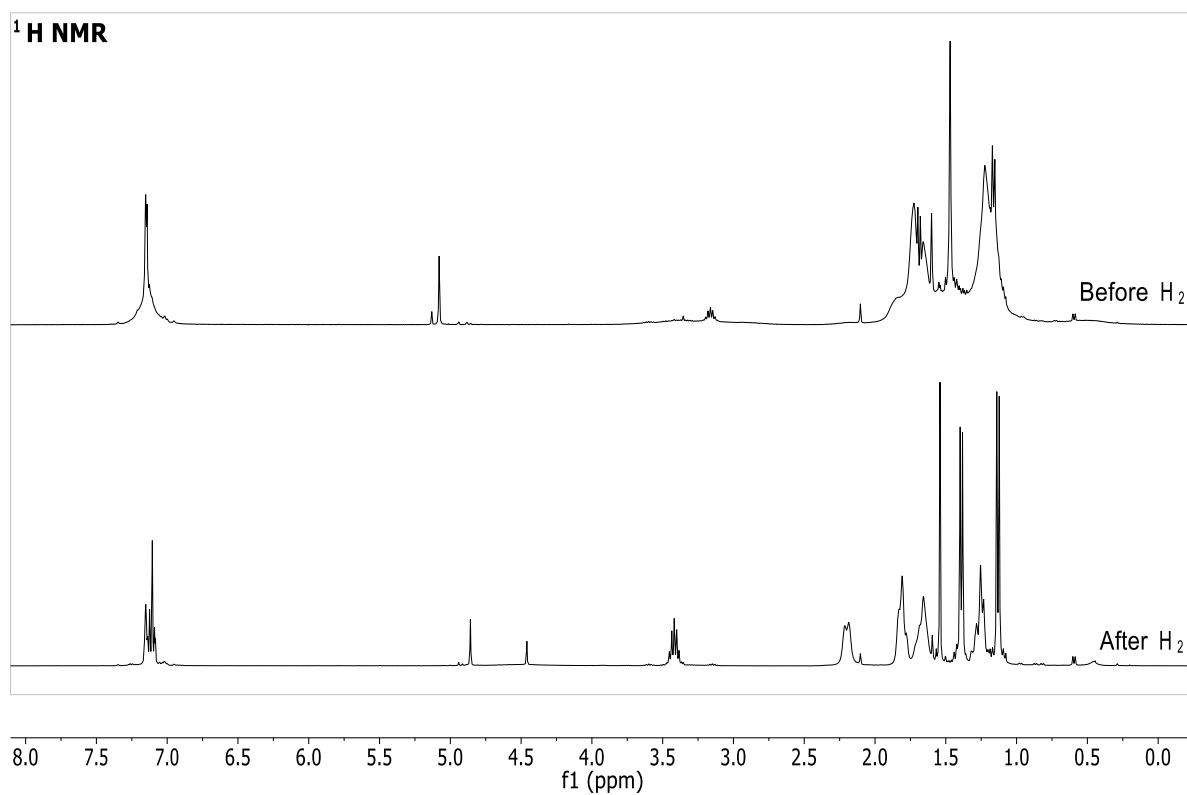

**Figure S20:** <sup>1</sup>H NMR spectrum of reaction of 2 equiv. of **2** and [Pd(PCy<sub>3</sub>)<sub>2</sub>] with H<sub>2</sub> (1 atm).

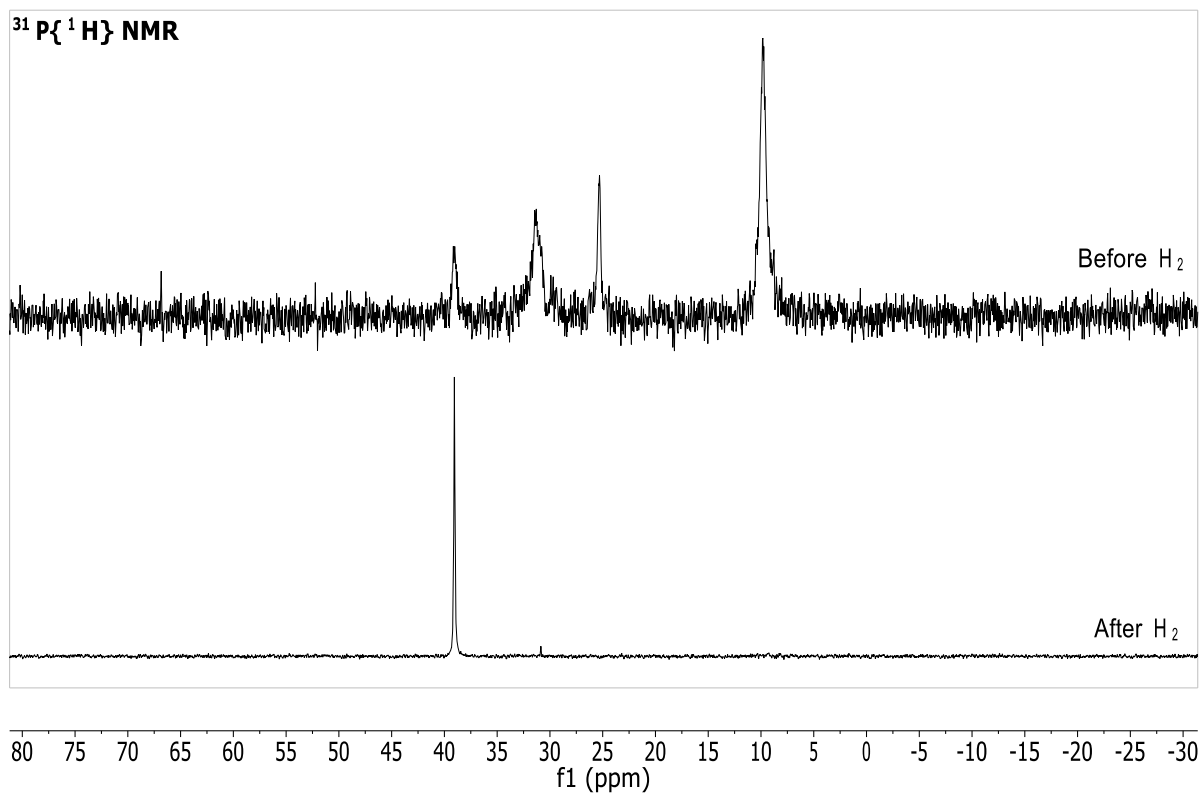

**Figure S21:** <sup>31</sup>P{<sup>1</sup>H} NMR spectrum of reaction of 2 equiv. of **2** and [Pd(PCy<sub>3</sub>)<sub>2</sub>] with H<sub>2</sub> (1 atm).



#### 5.4.2 $^1\text{H}$ NMR Spectrum of Reaction of $\text{H}_2$ with $[\text{Pd}(\text{PCy}_3)_2]$ and 20 equiv. Dipp-BDIAI (**2**)

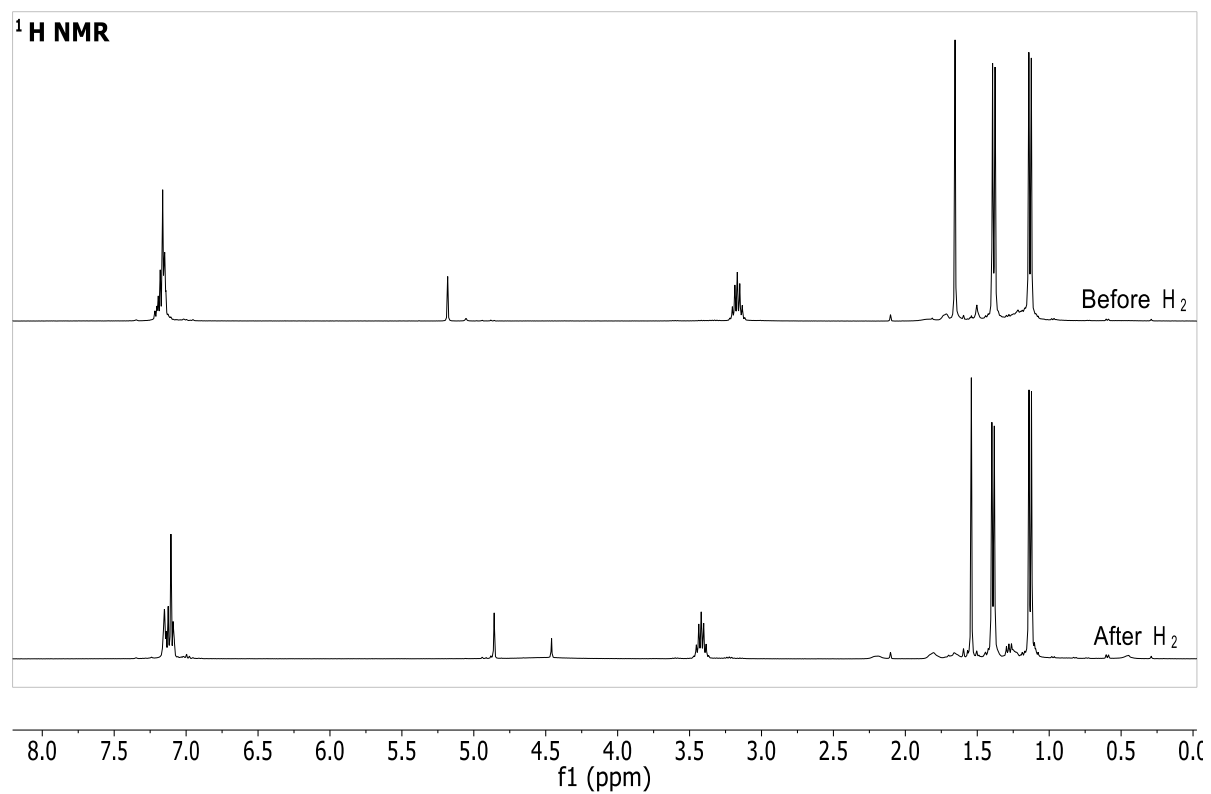

**Figure S22:**  $^1\text{H}$  NMR spectrum of reaction of 20 equiv. of **2** and  $[\text{Pd}(\text{PCy}_3)_2]$  with  $\text{H}_2$  (1 atm).

### 5.4.3 $^1\text{H}$ NMR Spectrum of Control Reaction of $\text{H}_2$ with Dipp-BDIAI (**2**)

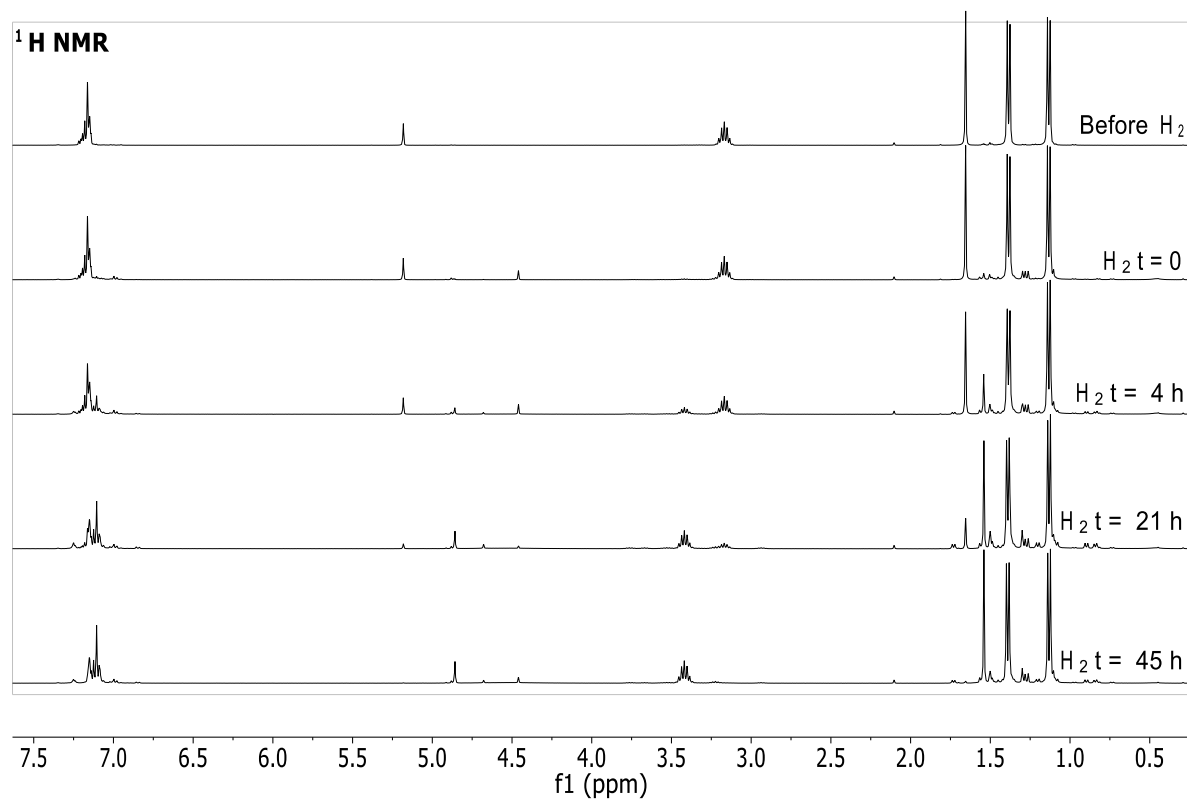

**Figure S23:**  $^1\text{H}$  NMR spectrum of reaction of **2** with  $\text{H}_2$  (1 atm).

## 6. Computational Details

### 6.1 Methods

The geometries of products were optimised with the M06L Minnesota DFT functional using the Gaussian09 program package.<sup>10</sup> NBO analysis was performed using the NBO 6.0 version program.<sup>11</sup> QTAIM analysis was conducted with the AIMAll package.<sup>12</sup> Non-covalent interactions were analysed with the NCIPLOT 3.0 program.<sup>13</sup> The  $\omega$ B97x hybrid exchange-correlation DFT functional and the B3PW91 functional were also employed to assess differences in performance arising from the level of theory. Stationary points were characterised depending on their imaginary frequencies (0 for minima and 1 for TSs). A combined basis set was employed.

```
C H 0
6-31G*
****
N P 0
6-311+G*
****
127 0 (atom 127 is the hydride)
S 1 1.00
0.0360000 1.0000000
P 1 1.00
3.0000000 1.0000000
P 1 1.00
0.7500000 1.0000000
P 1 1.00
0.1875000 1.0000000
D 1 1.00
1.0000000 1.0000000
****
Pd Al 0
SDDAll
```

---

<sup>10</sup> Frisch, M. J.; Trucks, G. W.; Schlegel, H. B.; Scuseria, G. E.; Robb, M. A.; Cheeseman, J. R.; Scalmani, G.; Barone, V.; Mennucci, B.; Petersson, G. A.; Nakatsuji, H.; Caricato, M.; Li, X.; Hratchian, H. P.; Izmaylov, A. F.; Bloino, J.; Zheng, G.; Sonnenberg, J. L.; Hada, M.; Ehara, M.; Toyota, K.; Fukuda, R.; Hasegawa, J.; Ishida, M.; Nakajima, T.; Honda, Y.; Kitao, O.; Nakai, H.; Vreven, T.; Montgomery, J. A., Jr.; Peralta, J. E.; Ogliaro, F.; Bearpark, M.; Heyd, J. J.; Brothers, E.; Kudin, K. N.; Staroverov, V. N.; Kobayashi, R.; Normand, J.; Raghavachari, K.; Rendell, A.; Burant, J. C.; Iyengar, S. S.; Tomasi, J.; Cossi, M.; Rega, N.; Millam, J. M.; Klene, M.; Knox, J. E.; Cross, J. B.; Bakken, V.; Adamo, C.; Jaramillo, J.; Gomperts, R.; Stratmann, R. E.; Yazyev, O.; Austin, A. J.; Cammi, R.; Pomelli, C.; Ochterski, J. W.; Martin, R. L.; Morokuma, K.; Zakrzewski, V. G.; Voth, G. A.; Salvador, P.; Dannenberg, J. J.; Dapprich, S.; Daniels, A. D.; Farkas, Ö.; Foresman, J. B.; Ortiz, J. V.; Cioslowski, J.; Fox, D. J. *Gaussian 09, Revision D.01*; Gaussian, Inc., Wallingford, CT, 2009.

<sup>11</sup> *NBO 6.0*. Glendening, E. D.; Badenhoop, J. K.; Reed, A. E.; Carpenter, J. E.; Bohmann, J. A.; Morales, C. M.; Landis, C. R.; Weinhold, F. Theoretical Chemistry Institute, University of Wisconsin, Madison (2013).

<sup>12</sup> AIMAll (Version 13.10.19), Todd A. Keith, TK Gristmill Software, Overland Park KS, USA, 2013 (aim.tkgristmill.com).

<sup>13</sup> Johnson, E. R.; Keinan, S.; Mori-Sánchez, P.; Contreras-García, J.; Cohen, A. J.; Yang, W. *J. Am. Chem. Soc.* 2010, **132**, 6498–6506.

The SDD effective core potential was used for all metals (SDDAll). The split-valence 6-31G\* basis set was used for C and H atoms. The basis set for metal hydrides was expanded by adding one extra set of diffuse functions and three sets of p- and one set of d- polarisation functions, i.e. formally [6-31++G(d,3pd)]. The triple- $\xi$  6-311+G\* basis set was used for heteroatoms. This basis set provided very similar results to the 6-31+G(d,p) basis set, but it was much more efficient in terms of computational cost.

The default numerical integration grid was also improved using a pruned grid with 99 radial shells and 590 angular points per shell (int=ultrafine). Dispersion effects were included *via* single point energy corrections and were modelled using the  $\omega$ B97xD functional for  $\omega$ B97x, using Grimme's D3 correction for M06L (EmpiricalDispersion=GD3)<sup>14</sup> and Grimme's D3 correction with Becke-Johnson damping (EmpiricalDispersion=GD3BJ) for B3PW91.<sup>15</sup> Solvent effects were not included since the reactions are carried out in rather nonpolar solvents. Furthermore, the computed results matched closely to the experimental ones without need to include solvent corrections.

### 6.1.1 Functional benchmarking

The DFT functionals employed were in good agreement with the experimental geometries and they have provided good results in previous benchmarking analysis done in the group.<sup>16</sup>

The performance of the three functionals was first inspected analysing the regioselectivity of the C–H activation of toluene (see below, Section 6.2). Although inclusion of dispersion improved the results regardless of the functional, M06L appeared to be more robust. The performance of M06L was next compared to the experimental values obtained from the kinetic analysis. The activation parameters were very close to the experimentally obtained ones in the Eyring analysis, *i.e.*  $\Delta H^\ddagger_{\text{M06L-D3}} = 24.9 \text{ kcal}\cdot\text{mol}^{-1}$  ( $\Delta H^\ddagger_{\text{exp}} = 23.4 (\pm 1.3) \text{ kcal}\cdot\text{mol}^{-1}$ ) and  $\Delta G^\ddagger_{\text{M06L-D3}} = 26.8 \text{ kcal}\cdot\text{mol}^{-1}$  ( $\Delta G^\ddagger_{\text{exp}} = 25.1 (\pm 2.6) \text{ kcal}\cdot\text{mol}^{-1}$ ) at 298 K.

The oxidative addition of benzene was also modelled using  $\text{C}_6\text{D}_6$  as a means to obtain a computational estimate of the KIE. The difference in  $\Delta G^\ddagger$  allowed to derive an estimated KIE = 5.9. This value is virtually identical to the experimental one (KIE = 5.8 ( $\pm 0.1$ )), which gives additional support to the choice of M06L as the best functional for this system.

---

<sup>14</sup> Grimme, S.; Antony, J.; Ehrlich, S.; Krieg, H. *J Chem. Phys.* 2010, **132**, 154104.

<sup>15</sup> Grimme, S.; Ehrlich, S.; Goerigk, L. *J Comp. Chem.* 2011, **32**, 1456–1465.

<sup>16</sup> a) Butler, M. J.; White, A. J. P.; Crimmin, M. R. *Angew. Chem. Int. Ed.*, 2016, **55**, 6951–6953. b) Hicken, A.; White, A. J. P.; Crimmin, M.R. *Angew. Chem. Int. Ed.* 2017, **56**, 15127–15130.

## 6.2 Origin of Regioselectivity

The regioselectivity of the C–H activation of toluene was inspected computationally with a series of functionals ( $\omega$ B97x, M06L and B3PW91). The oxidative addition of the C–H bond to Pd is the rate-determining and regiochemistry determining step.

**Int-2** and **Int-2'** stationary points contain a loosely bound toluene molecule. These stationary points are very close in energy ( $\Delta\Delta G < 2.1 \text{ kcal}\cdot\text{mol}^{-1}$ ) and the toluene moiety can undergo facile rotation or dissociation and reassociation. It is a valid assumption that all these regioisomers of the encounter complex **Int-2** and **Int-2'** are in fast equilibrium under the reaction conditions. The activation energy of C–H activation will be determined by the energy difference of the lowest energy encounter complex to the C–H activation transition states. Hence the system can be considered to be under Curtin-Hammett control and the regioselectivity is determined by considering the  $\Delta\Delta G$  between possible isomeric transition states of **TS-1** and **TS-1'**.

When dispersion corrections were included into the calculations, a systematic and functional-independent stabilisation of the ortho TSs was observed. A minor stabilisation of the meta TSs compared to the para TSs was also observed (Figure S24). The data for the pathway from **Int-1** are included in the paper while the data from **Int-1'** are provided below. Once the dispersion correction is applied the data are consistent across the series of functionals and predict the correct regiochemistry as observed in experiment for both pathways involving both **TS-1** and **TS-1'** (ortho  $\sim$  meta  $>$  para).

The weak dispersive interactions are the cause of this systematic stabilisation as well as for the observed selectivity. These interactions are apparent in QTAIM analysis of the regioisomeric transition states (see main text) with bond critical points and bond critical paths for weak dispersion interactions observed between the methyl group of toluene and C–H bonds of the  $\beta$ -position of  $\text{PCy}_3$  or the methyl of the *i*-Pr groups on the  $\beta$ -diketiminate ligands.

The non-covalent interactions can be further analysed using the NCIPLOT program. The plots show a network of weakly attractive interactions (green) that can be attributed to dispersion forces. For both ortho transition states, significant attractive interactions are detected between the methyls and the ligand scaffold. Meta and para TSs show practically no interaction between the methyls and the ligand. The rest of interactions are relatively similar for all five transition states (Fig. S26)

**Figure S24.** (a) Relative free energies ( $\text{kcal}\cdot\text{mol}^{-1}$ ) for the five regioisomeric TSs of C–H activation of toluene from **Int-2'** using different DFT functionals. (b) QTAIM for activation at the ortho position showing dispersive interactions between the methyl group and the ligands. The ligands have been partially truncated for clarity.

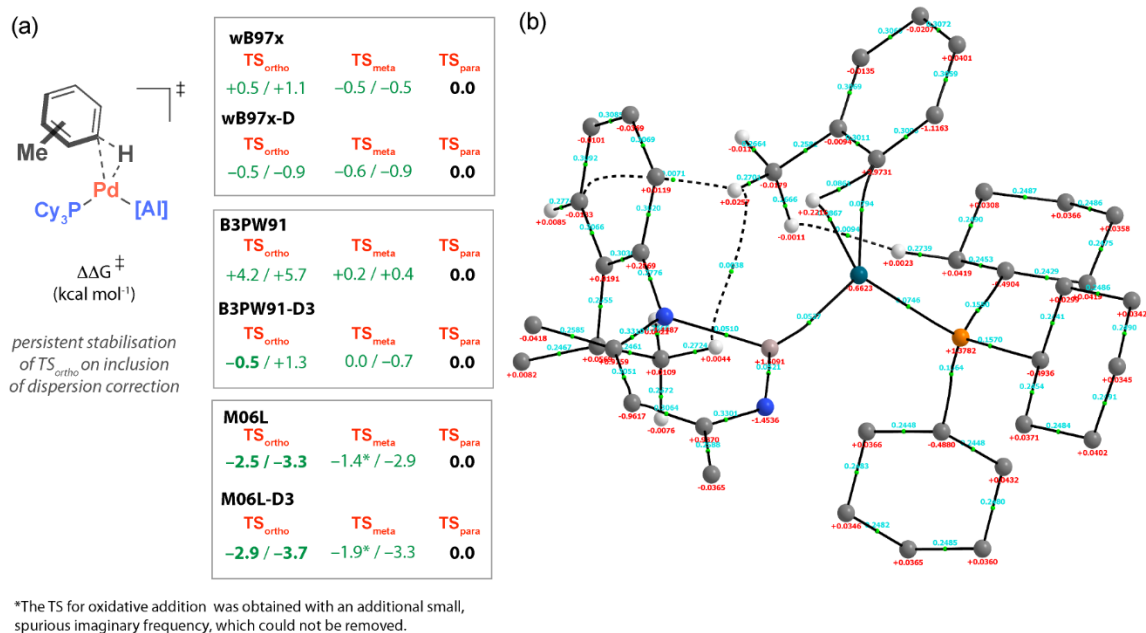

**Figure S25.** (a) Relative free energies ( $\text{kcal}\cdot\text{mol}^{-1}$ ) for the five regioisomeric TSs of C–H activation of toluene from **Int-2'** using different DFT functionals. (b) QTAIM for activation at the ortho ( $H^0$ ) position showing dispersive interactions between the methyl group and the ligands. The ligands have been partially truncated for clarity.

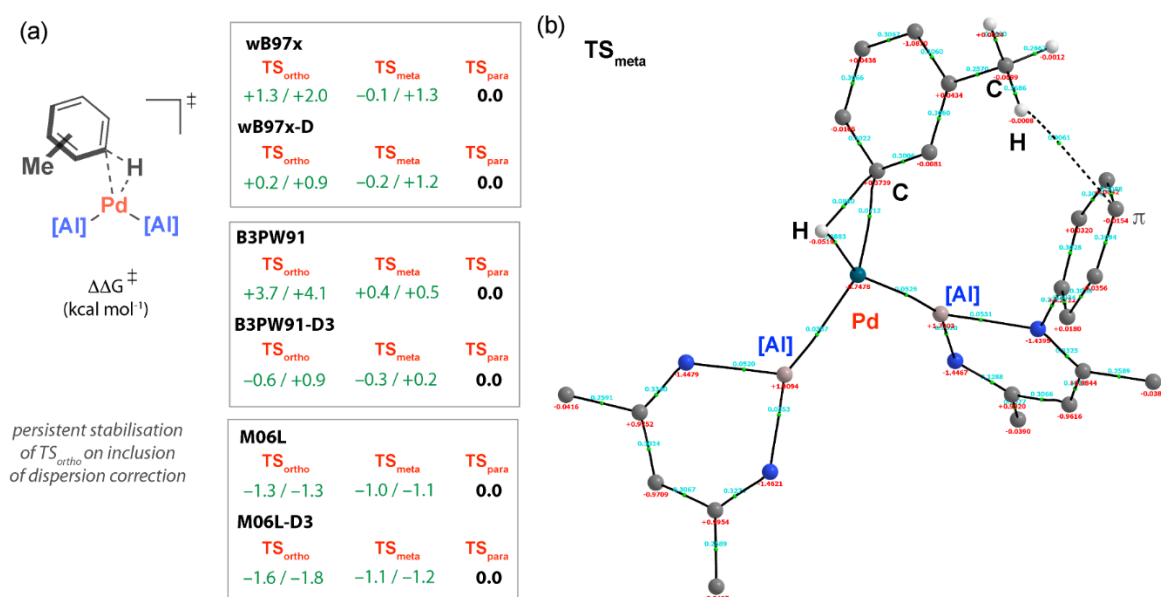

**Figure S26.** Non-covalent interaction (NCI) plots of the five regioisomeric TSs of C–H activation of toluene.

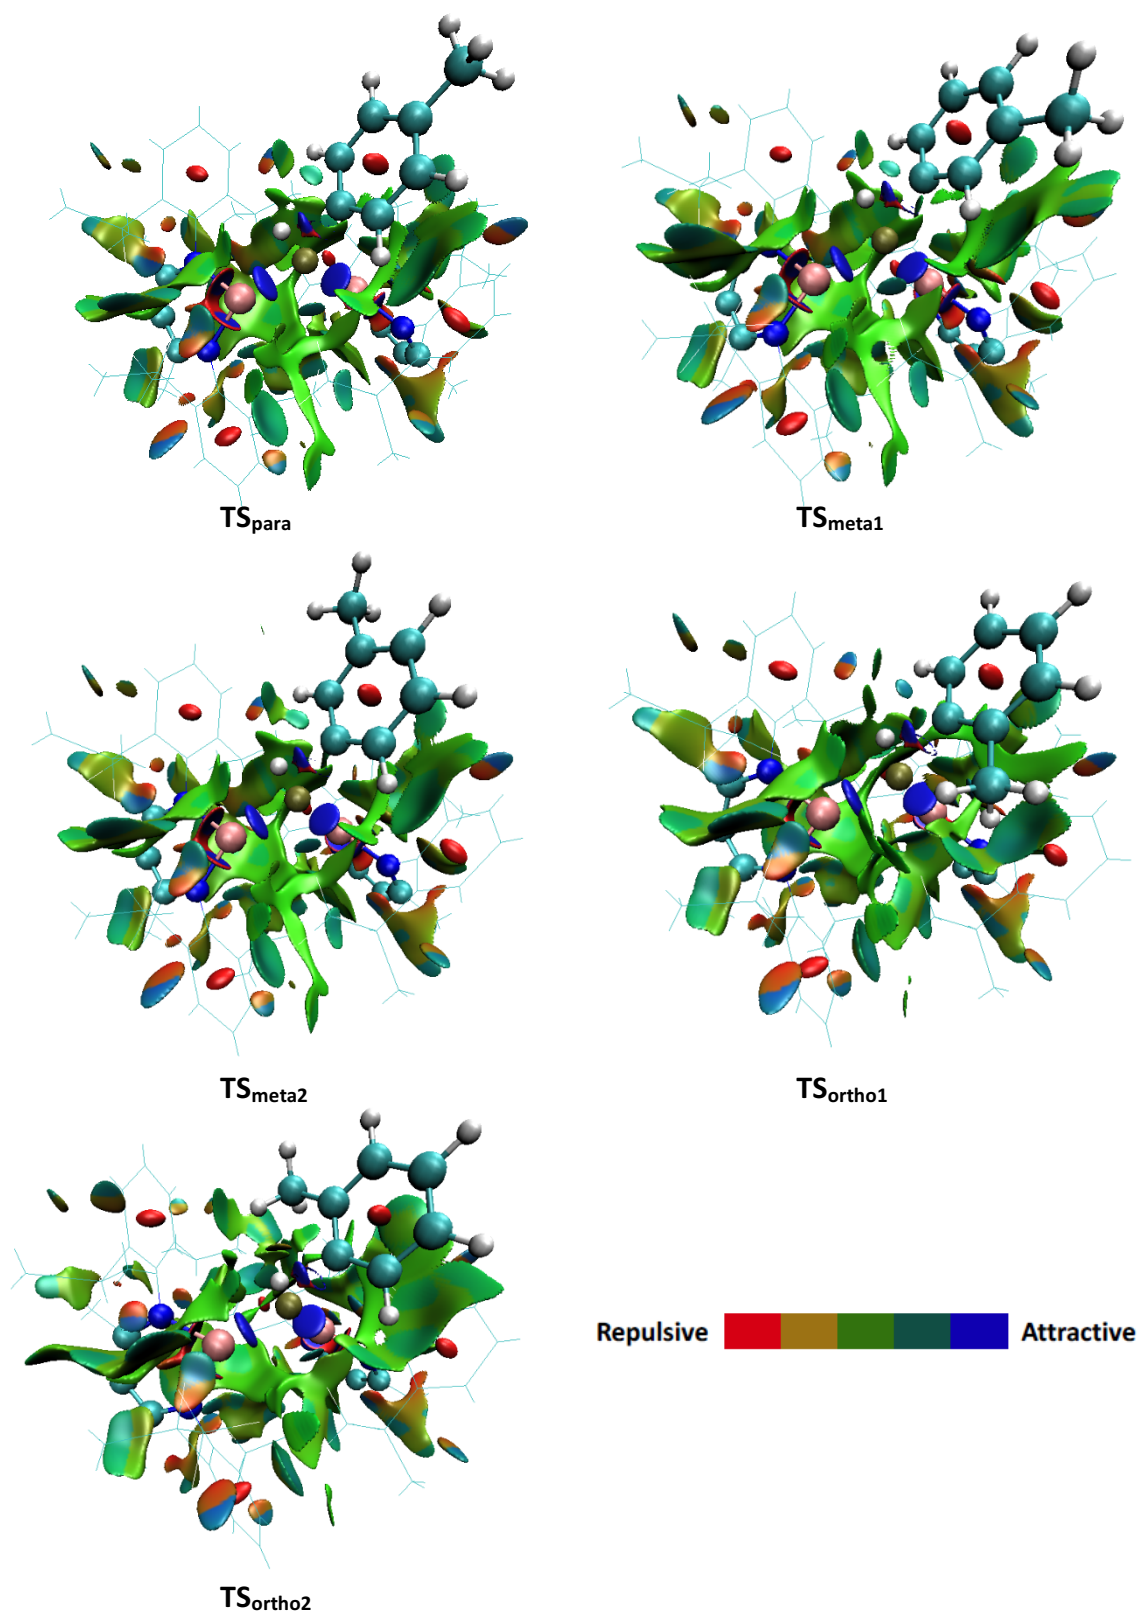

## 6.3 Mechanism. C<sub>6</sub>H<sub>6</sub> activation

### 6.3.1 Key geometrical parameters of intermediates, *Int.2* – *Int.5*.

**Figure S27.** Selected bond lengths (in Å) for *Int-2*. *i*-Pr groups and some hydrogens have been omitted for clarity.

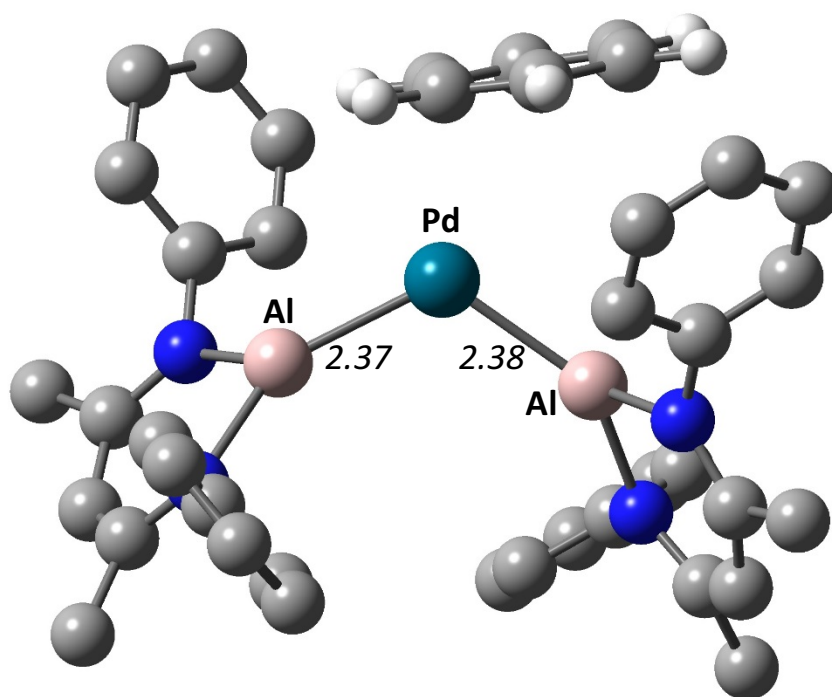



**Figure S28.** Selected bond lengths (in Å) for **Int-3**. *i*-Pr groups and some hydrogens have been omitted for clarity.

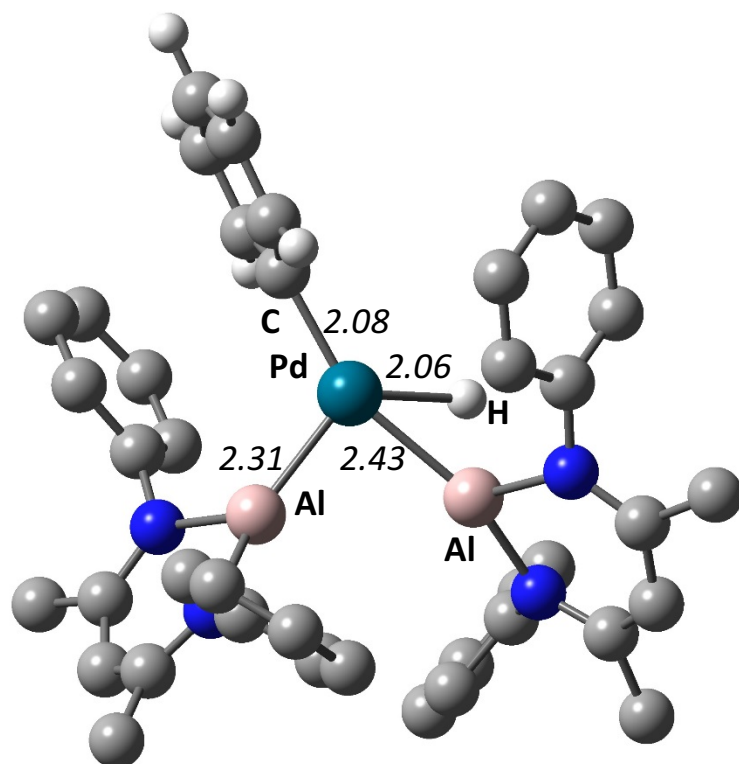

**Figure S29.** Selected bond lengths (in Å) for **Int-4**. *i*-Pr groups and some hydrogens have been omitted for clarity.

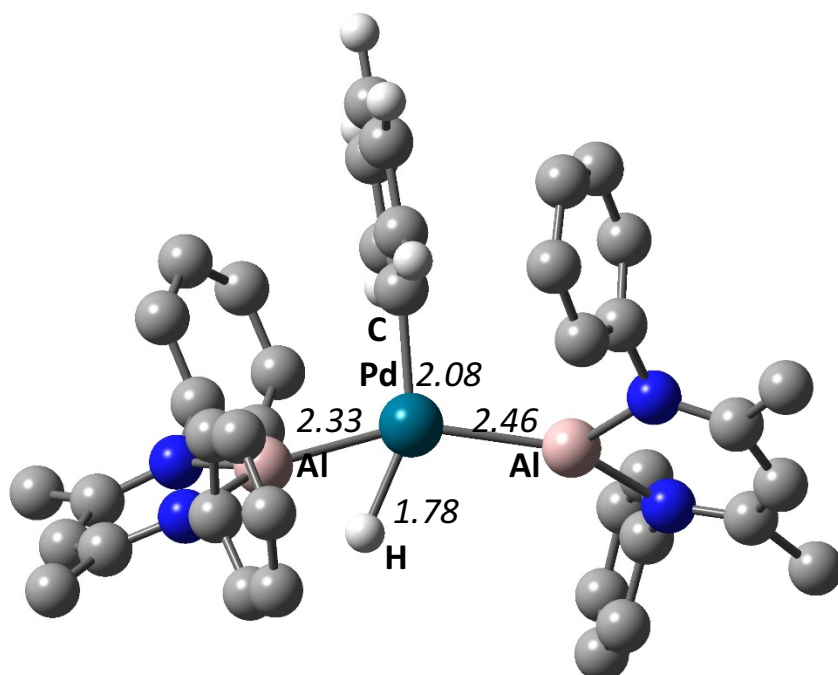

**Figure S30.** Selected bond lengths (in Å) for **Int-5**. *i*-Pr groups and some hydrogens have been omitted for clarity.

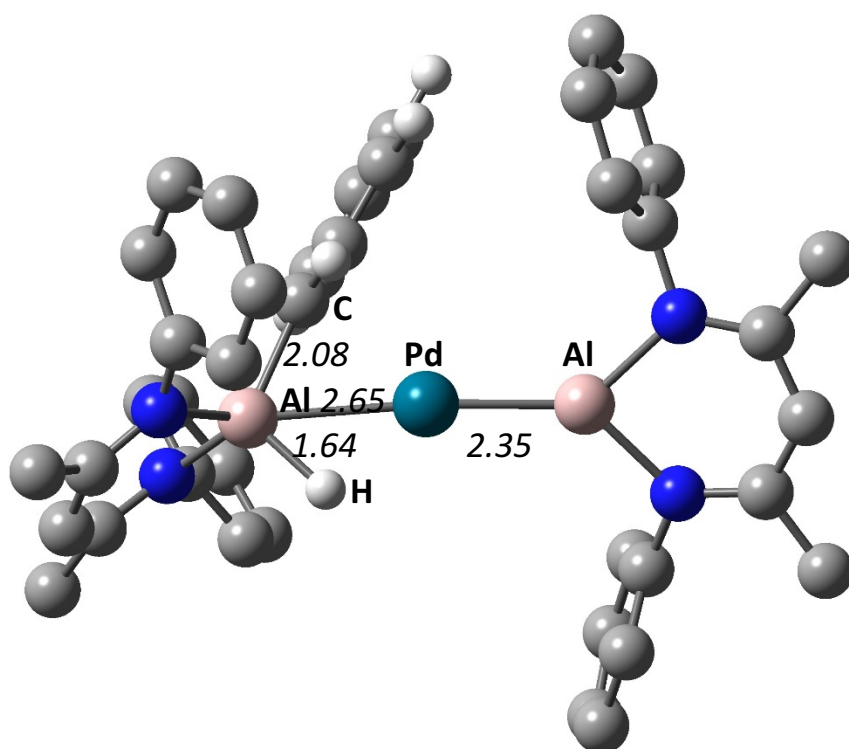

### 6.3.2 C–H activation pathway from Int-1'

Depending on the PdL<sub>2</sub> fragment that is formed under catalytic conditions, two pathways can be considered. The pathway from **Int-1** is provided in the main text, while the pathway from **Int-1'** is given below. The focus on **Int-1** as the most relevant reactive intermediate is based on the observation that catalysis not only occurs in the absence of the phosphine ligand but also that the ratio of regioisomeric products from the reaction of toluene with **2** is identical from catalytic runs employing either [Pd(PCy<sub>3</sub>)<sub>2</sub>] or [Pd(η<sup>5</sup>-C<sub>5</sub>H<sub>5</sub>)(η<sup>3</sup>-C<sub>3</sub>H<sub>4</sub>Ph)] as catalyst.

Figure S31. Calculated free energy profile for C–H alumination of benzene from Int-1'.

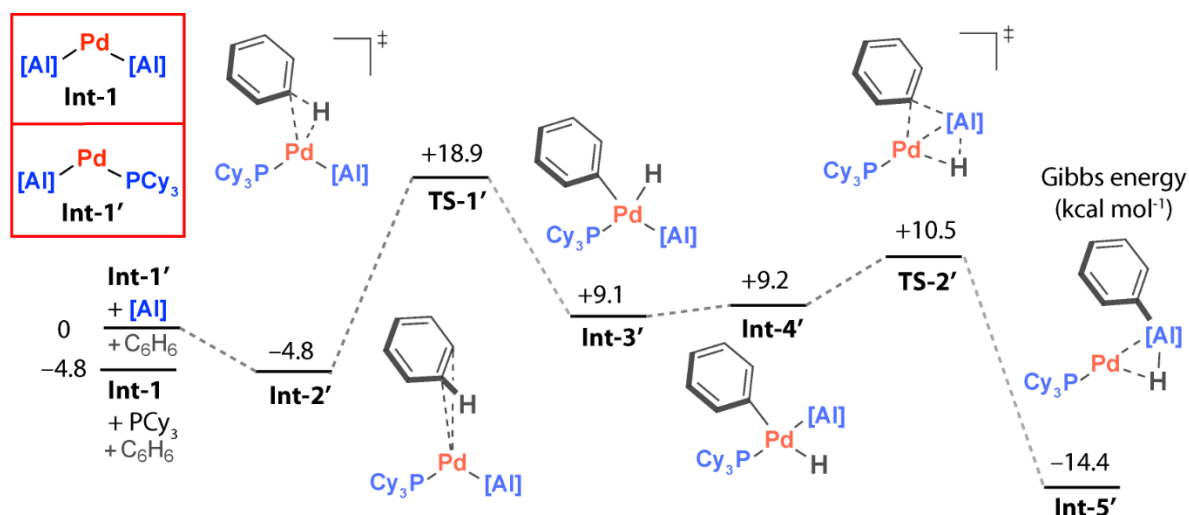

Both pathways, initiated from either **Int-1** or **Int-1'**, have very similar profiles. Both involve a rate-limiting oxidative addition of the C–H bond to palladium. Other mechanistic possibilities were explored. These included (i) C–H activation by 1,2-addition of the C–H bond of benzene across the Pd–Al bond of **Int-1** or **Int-1'**, or (ii) C–Al and Al–H bond formation from **Int-3** rather than **Int-4**, or (iii) oxidative addition of the C–H bond to **Int-1'** to form the diastereomer with the Ph group *trans* to PCy<sub>3</sub>, or (iv) C–H activation at Pd(PCy<sub>3</sub>)<sub>2</sub>. These calculations did not lead to the identification of viable pathways for C–H alumination and either led to high energy intermediates or did not converge to suitable stationary points.

In order to confirm that the small energy difference between the pathways propagating from **Int-1** or **Int-1'** is not functional dependent, both pathways were also computed at the ωB97x S-51

level. The profiles presented side by side in Figure S31 parallel those found for the M06L functional.

**Figure S32.** Calculated free energy profile for C–H almination of benzene from **Int-1** and **Int-1'** at the  $\omega$ B97x level.

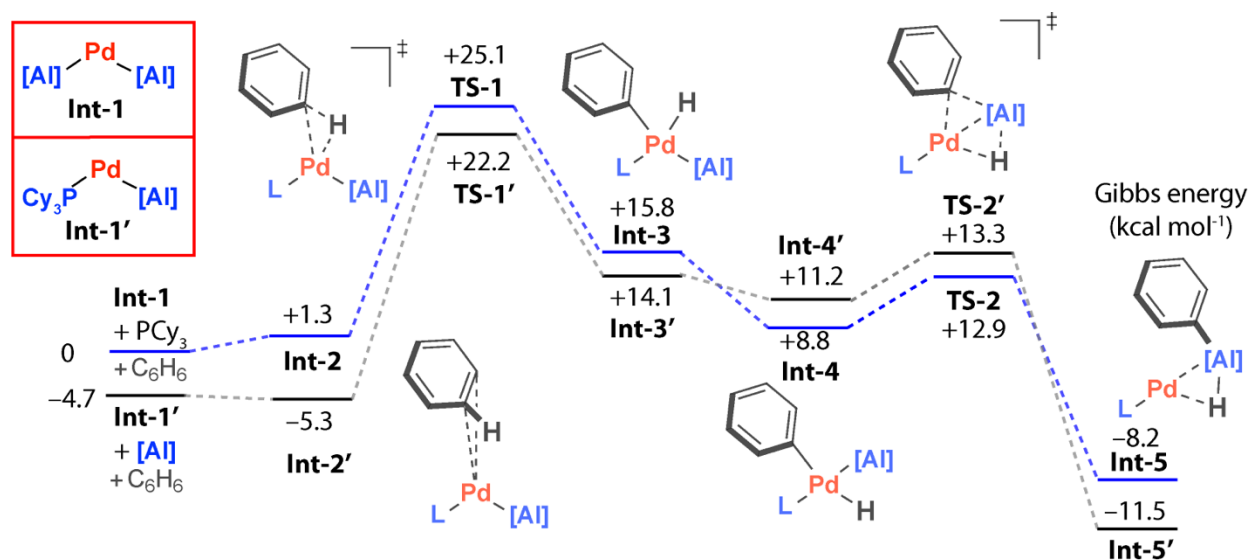

## 6.4 NBO analysis

The NPA charges and Wiberg Bond Indices (WBI) were inspected (M06L) for pathways from both **Int-1** and **Int-1'**.

**Figure S33.** Models for **TS1** and **TS2**, showcasing the atoms and bonds relevant to the NBO analysis.

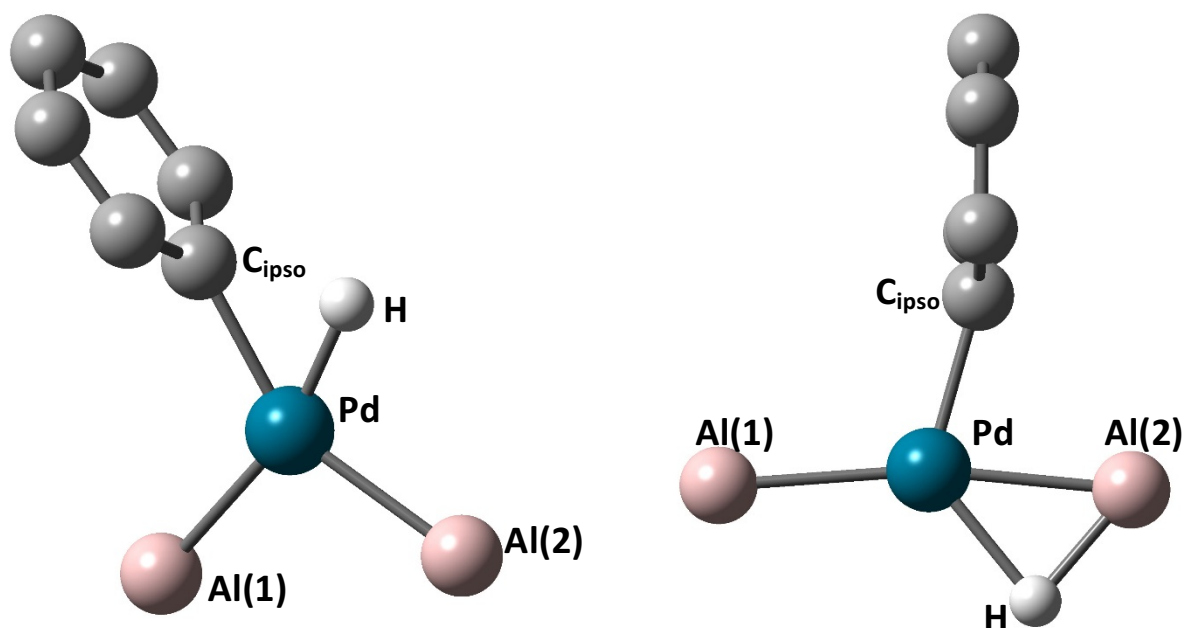

**Table S2.** Wiberg Bond Indices on stationary points on the pathway from **Int-1**

|                               | <b>Int-2</b> | <b>TS-1</b> | <b>Int-3</b> | <b>Int-4</b> | <b>TS-2</b> | <b>Int-5</b> |
|-------------------------------|--------------|-------------|--------------|--------------|-------------|--------------|
| <i>Pd-Al(1)</i>               | 0.54         | 0.49        | 0.60         | 0.44         | 0.58        | 0.81         |
| <i>Pd-Al(2)</i>               | 0.55         | 0.50        | 0.33         | 0.36         | 0.33        | 0.11         |
| <i>Pd-H</i>                   | 0.00         | 0.28        | 0.08         | 0.24         | 0.12        | 0.08         |
| <i>Pd-C<sub>ipso</sub></i>    | 0.08         | 0.29        | 0.37         | 0.42         | 0.34        | 0.09         |
| <i>Al(1)-H</i>                | 0.00         | 0.16        | 0.08         | 0.05         | 0.04        | 0.03         |
| <i>Al(1)-C<sub>ipso</sub></i> | 0.01         | 0.12        | 0.20         | 0.09         | 0.08        | 0.02         |
| <i>Al(2)-H</i>                | 0.00         | 0.15        | 0.57         | 0.42         | 0.55        | 0.61         |
| <i>Al(2)-C<sub>ipso</sub></i> | 0.02         | 0.16        | 0.18         | 0.23         | 0.38        | 0.46         |
| <i>C<sub>ipso</sub>-H</i>     | 0.90         | 0.36        | 0.01         | 0.12         | 0.05        | 0.02         |

**Table S3.** NPA charges on stationary points on the pathway from **Int-1**

|              | <b>Pd</b> | <b>H</b> | <b>C<sub>ipso</sub></b> | <b>Al(2)</b> | <b>Al(1)</b> |
|--------------|-----------|----------|-------------------------|--------------|--------------|
| <i>Int-2</i> | -0.39     | 0.24     | -0.28                   | 0.99         | 1.00         |
| <i>TS-1</i>  | -0.27     | -0.02    | -0.26                   | 1.14         | 1.11         |
| <i>Int-3</i> | -0.08     | -0.47    | -0.30                   | 1.22         | 1.22         |
| <i>Int-4</i> | -0.19     | -0.38    | -0.25                   | 1.35         | 1.19         |
| <i>TS-2</i>  | -0.21     | -0.45    | -0.32                   | 1.47         | 1.13         |
| <i>Int-5</i> | -0.30     | -0.45    | -0.70                   | 1.78         | 1.12         |

**Figure S34.** Models for **TS1'** and **TS2'**, showcasing the atoms and bonds relevant to the NBO analysis.

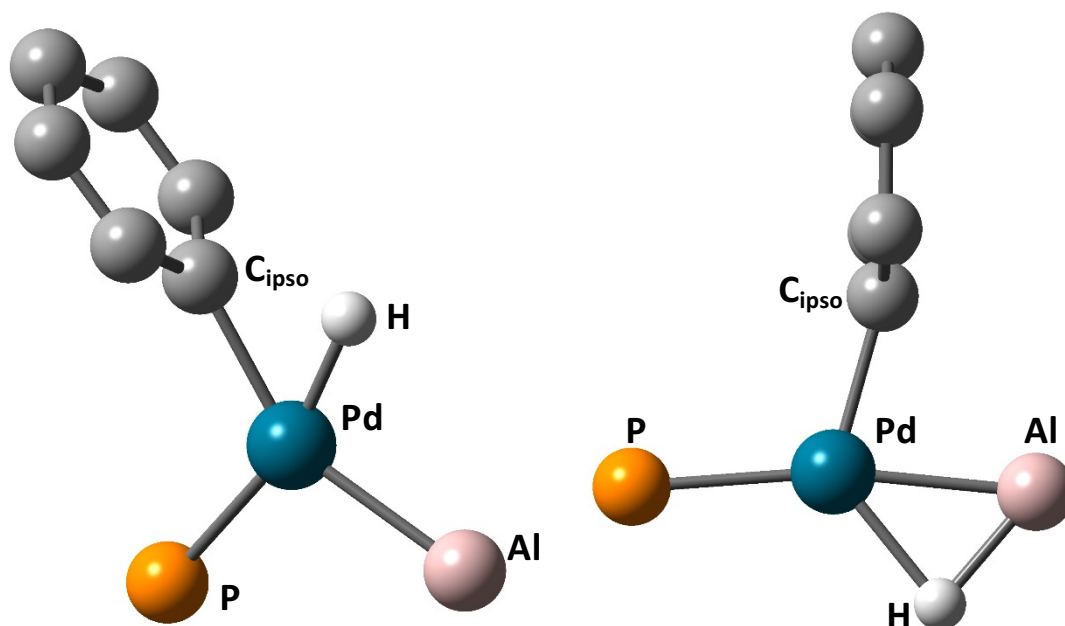

**Table S4.** Wiberg Bond Indices on stationary points on the pathway from **Int-1'**

|                            | <b>Int-2'</b> | <b>TS-1'</b> | <b>Int-3'</b> | <b>Int-4'</b> | <b>TS-2'</b> | <b>Int-5'</b> |
|----------------------------|---------------|--------------|---------------|---------------|--------------|---------------|
| <i>Pd-P</i>                | 0.34          | 0.29         | 0.42          | 0.26          | 0.31         | 0.47          |
| <i>Pd-Al</i>               | 0.70          | 0.60         | 0.47          | 0.53          | 0.44         | 0.32          |
| <i>Pd-H</i>                | 0.00          | 0.35         | 0.31          | 0.24          | 0.15         | 0.25          |
| <i>Pd-C<sub>ipso</sub></i> | 0.05          | 0.28         | 0.30          | 0.45          | 0.39         | 0.02          |
| <i>Al-H</i>                | 0.00          | 0.11         | 0.36          | 0.42          | 0.53         | 0.48          |
| <i>Al-C<sub>ipso</sub></i> | 0.01          | 0.18         | 0.30          | 0.19          | 0.36         | 0.45          |
| <i>C<sub>ipso</sub>-H</i>  | 0.91          | 0.40         | 0.05          | 0.14          | 0.07         | 0.02          |

**Table S5.** NPA charges on stationary points on the pathway from **Int-1'**

|               | <b>Pd</b> | <b>H</b> | <b>C<sub>ipso</sub></b> | <b>Al</b> | <b>P</b> |
|---------------|-----------|----------|-------------------------|-----------|----------|
| <i>Int-2'</i> | -0.29     | 0.24     | -0.25                   | 1.05      | 0.90     |
| <i>TS-1'</i>  | -0.09     | 0.01     | -0.28                   | 1.13      | 0.96     |
| <i>Int-3'</i> | 0.08      | -0.33    | -0.31                   | 1.19      | 1.10     |
| <i>Int-4'</i> | 0.05      | -0.38    | -0.25                   | 1.30      | 0.99     |
| <i>TS-2'</i>  | 0.04      | -0.44    | -0.30                   | 1.47      | 0.91     |
| <i>Int-5'</i> | -0.18     | -0.37    | -0.64                   | 1.73      | 0.99     |

## 6.5 Additional QTAIM analysis

**Figure S35.** QTAIM contour plot of  $\rho$  for TS-1. Charges are depicted in red and the Laplacian of  $\rho$  ( $\nabla^2\rho$ ) in blue.

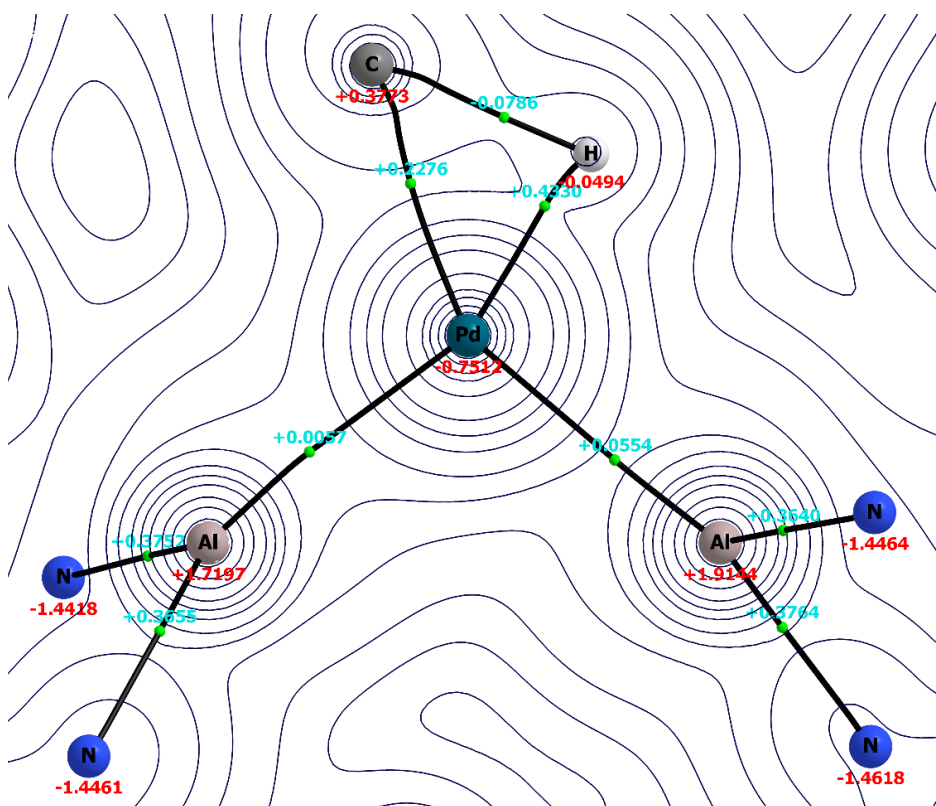

**Figure S36.** QTAIM contour plot of  $\rho$  for TS-2. Charges are depicted in red and the Laplacian of  $\rho$  ( $\nabla^2\rho$ ) in blue.

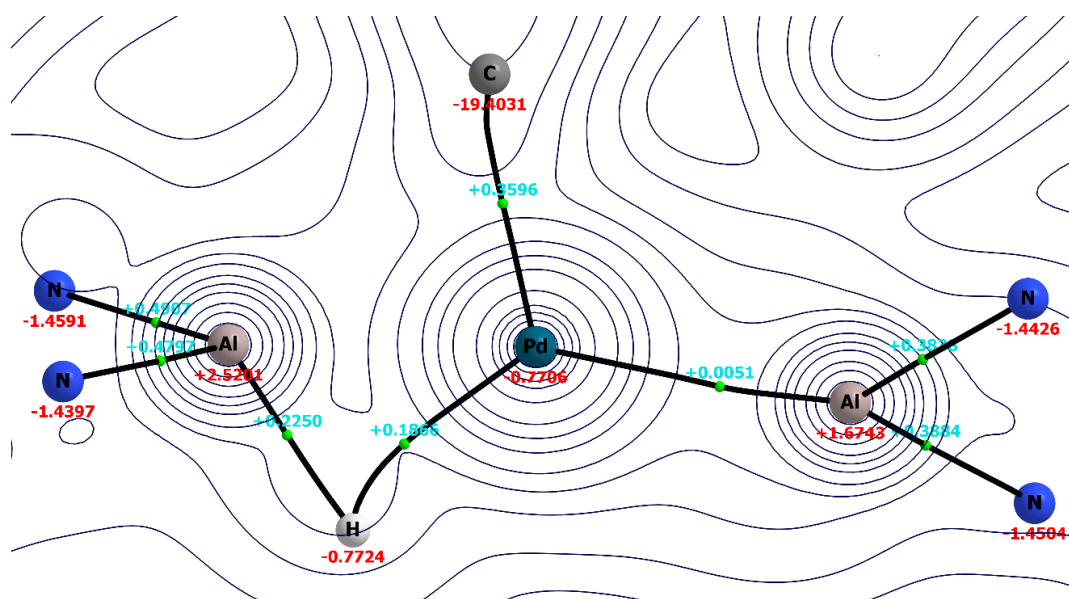

## 6.6 XYZ Coordinates

DippAlH2.log

SCF (wB97x) = -1242.43254984

H(0 K)= -1241.778088

H(298 K)= -1241.742111

G(298 K)= -1241.844421

Lowest Frequency = 20.2274cm<sup>-1</sup>

|    |           |           |           |
|----|-----------|-----------|-----------|
| N  | 1.412495  | 0.386717  | 0.413152  |
| C  | 1.237907  | 0.519981  | 1.728773  |
| Al | -0.009028 | 0.640270  | -0.882598 |
| H  | 0.057540  | -0.475642 | -1.986261 |
| H  | -0.078394 | 2.155160  | -1.306157 |
| N  | -1.423631 | 0.261718  | 0.397240  |
| C  | -0.027443 | 0.633783  | 2.324709  |
| H  | -0.039839 | 0.775418  | 3.401147  |
| C  | -1.275694 | 0.429692  | 1.712868  |
| C  | 2.439404  | 0.510719  | 2.626902  |
| H  | 3.154028  | 1.289562  | 2.331103  |
| H  | 2.981439  | -0.439994 | 2.546662  |
| H  | 2.161719  | 0.665137  | 3.672438  |
| C  | -2.482907 | 0.377488  | 2.603553  |
| H  | -3.112857 | 1.263511  | 2.450821  |
| H  | -2.199553 | 0.339831  | 3.658485  |
| H  | -3.113390 | -0.489094 | 2.372605  |
| C  | 2.706609  | 0.048967  | -0.100601 |
| C  | 3.587871  | 1.064561  | -0.517476 |
| C  | 4.818338  | 0.689170  | -1.063262 |
| H  | 5.509577  | 1.465570  | -1.392856 |
| C  | 5.171214  | -0.647327 | -1.195424 |
| H  | 6.135327  | -0.919182 | -1.621795 |
| C  | 4.284510  | -1.636164 | -0.787491 |
| H  | 4.557577  | -2.686221 | -0.898827 |
| C  | 3.041072  | -1.313233 | -0.240721 |
| C  | 2.096906  | -2.424250 | 0.176906  |
| H  | 1.180545  | -1.964379 | 0.574580  |
| C  | 1.695810  | -3.286514 | -1.018567 |
| H  | 1.193988  | -2.690779 | -1.790859 |
| H  | 1.011872  | -4.086029 | -0.704435 |
| H  | 2.571276  | -3.765752 | -1.476756 |
| C  | 2.702477  | -3.288585 | 1.282262  |
| H  | 2.979561  | -2.696123 | 2.163084  |
| H  | 3.608883  | -3.802035 | 0.934785  |
| H  | 1.992187  | -4.059139 | 1.607452  |
| C  | 3.233076  | 2.534429  | -0.412760 |
| H  | 2.267023  | 2.616919  | 0.104623  |
| C  | 4.269860  | 3.314583  | 0.394121  |
| H  | 4.415485  | 2.893697  | 1.396930  |
| H  | 3.963368  | 4.361270  | 0.509953  |
| H  | 5.248235  | 3.314216  | -0.104087 |
| C  | 3.066091  | 3.150925  | -1.801435 |
| H  | 2.300835  | 2.627328  | -2.385664 |
| H  | 4.007637  | 3.108962  | -2.365683 |
| H  | 2.767216  | 4.203799  | -1.726975 |
| C  | -2.712073 | -0.060722 | -0.141753 |
| C  | -3.663587 | 0.953664  | -0.364152 |
| C  | -4.895773 | 0.592627  | -0.916898 |



|   |           |           |           |
|---|-----------|-----------|-----------|
| H | -5.641384 | 1.367026  | -1.098662 |
| C | -5.178811 | -0.724536 | -1.246440 |
| H | -6.145714 | -0.986315 | -1.672889 |
| C | -4.216245 | -1.708211 | -1.048635 |
| H | -4.438308 | -2.735253 | -1.331808 |
| C | -2.967051 | -1.401523 | -0.505870 |
| C | -1.916264 | -2.478191 | -0.301204 |
| H | -0.937156 | -2.018046 | -0.505433 |
| C | -1.886432 | -2.979283 | 1.144023  |
| H | -1.150630 | -3.787041 | 1.256446  |
| H | -2.865425 | -3.377495 | 1.444121  |
| H | -1.611233 | -2.187085 | 1.850463  |
| C | -2.070680 | -3.649765 | -1.263415 |
| H | -1.216436 | -4.330353 | -1.172058 |
| H | -2.122071 | -3.313507 | -2.305876 |
| H | -2.971576 | -4.241121 | -1.053238 |
| C | -3.379961 | 2.416573  | -0.082054 |
| H | -2.429339 | 2.487256  | 0.465072  |
| C | -4.469599 | 3.066475  | 0.769835  |
| H | -4.655944 | 2.517538  | 1.701416  |
| H | -5.423430 | 3.117943  | 0.229034  |
| H | -4.191865 | 4.094189  | 1.033054  |
| C | -3.210821 | 3.187453  | -1.392218 |
| H | -2.403429 | 2.770026  | -2.003796 |
| H | -2.973181 | 4.240574  | -1.196553 |
| H | -4.135665 | 3.156395  | -1.984021 |

DippAlHPh.log

SCF (wB97x) = -1473.46044615

H(0 K)= -1472.721953

H(298 K)= -1472.681329

G(298 K)= -1472.793932

Lowest Frequency = 18.6537cm<sup>-1</sup>

|    |           |           |           |
|----|-----------|-----------|-----------|
| N  | -1.405211 | -0.400146 | 0.576110  |
| C  | -1.241156 | -0.522283 | 1.896516  |
| Al | 0.015598  | 0.171664  | -0.625495 |
| H  | 0.087494  | -0.710061 | -1.921140 |
| N  | 1.445048  | -0.264531 | 0.610427  |
| C  | 0.009562  | -0.444934 | 2.531575  |
| H  | 0.000186  | -0.539165 | 3.613192  |
| C  | 1.273956  | -0.410479 | 1.925739  |
| C  | -2.432702 | -0.788051 | 2.769461  |
| H  | -3.074759 | -1.568436 | 2.345127  |
| H  | -3.055455 | 0.110651  | 2.855634  |
| H  | -2.128592 | -1.086259 | 3.776033  |
| C  | 2.476297  | -0.577011 | 2.807004  |
| H  | 3.111046  | -1.402481 | 2.463250  |
| H  | 2.191253  | -0.760632 | 3.845832  |
| H  | 3.104752  | 0.322192  | 2.772598  |
| C  | -2.707121 | -0.612692 | 0.003776  |
| C  | -2.960015 | -1.848953 | -0.634995 |
| C  | -4.220194 | -2.054453 | -1.199587 |
| H  | -4.437008 | -3.000175 | -1.691835 |
| C  | -5.202496 | -1.072302 | -1.152693 |
| H  | -6.178083 | -1.254100 | -1.600411 |
| C  | -4.927873 | 0.143129  | -0.546233 |
| H  | -5.690516 | 0.922061  | -0.527581 |

S-57

|   |           |           |           |
|---|-----------|-----------|-----------|
| C | -3.684899 | 0.402690  | 0.039582  |
| C | -3.447807 | 1.772657  | 0.646186  |
| H | -2.454624 | 1.778984  | 1.118426  |
| C | -3.451959 | 2.850546  | -0.438629 |
| H | -2.710262 | 2.648350  | -1.218052 |
| H | -3.221933 | 3.833623  | -0.009494 |
| H | -4.439486 | 2.914106  | -0.915960 |
| C | -4.492534 | 2.123250  | 1.707440  |
| H | -4.582048 | 1.359340  | 2.489317  |
| H | -5.487545 | 2.239531  | 1.258274  |
| H | -4.243507 | 3.075186  | 2.191857  |
| C | -1.903101 | -2.938253 | -0.688102 |
| H | -0.931972 | -2.444018 | -0.838382 |
| C | -1.816142 | -3.716171 | 0.626483  |
| H | -1.503839 | -3.081917 | 1.464675  |
| H | -1.083070 | -4.529591 | 0.542529  |
| H | -2.784703 | -4.166791 | 0.883221  |
| C | -2.094641 | -3.899828 | -1.855105 |
| H | -2.191087 | -3.366943 | -2.808557 |
| H | -2.983182 | -4.532224 | -1.728719 |
| H | -1.234584 | -4.574647 | -1.933592 |
| C | 2.736510  | -0.510355 | 0.032841  |
| C | 3.001447  | -1.807638 | -0.455131 |
| C | 4.239028  | -2.052044 | -1.052760 |
| H | 4.460040  | -3.053378 | -1.423649 |
| C | 5.188205  | -1.045747 | -1.180415 |
| H | 6.146802  | -1.253943 | -1.652631 |
| C | 4.906229  | 0.227101  | -0.704100 |
| H | 5.648134  | 1.019346  | -0.808868 |
| C | 3.685927  | 0.522715  | -0.089476 |
| C | 3.432287  | 1.933246  | 0.403138  |
| H | 2.452794  | 1.950753  | 0.902199  |
| C | 4.491679  | 2.384924  | 1.408808  |
| H | 4.245531  | 3.376150  | 1.808719  |
| H | 5.480568  | 2.460448  | 0.937636  |
| H | 4.590380  | 1.694130  | 2.255529  |
| C | 3.373311  | 2.918474  | -0.763718 |
| H | 3.128014  | 3.927011  | -0.408292 |
| H | 2.611436  | 2.633356  | -1.497083 |
| H | 4.341553  | 2.969021  | -1.280571 |
| C | 2.005694  | -2.943549 | -0.313726 |
| H | 1.065563  | -2.529661 | 0.077781  |
| C | 2.503038  | -3.982248 | 0.692099  |
| H | 2.674544  | -3.542870 | 1.682678  |
| H | 3.449874  | -4.430449 | 0.362060  |
| H | 1.774703  | -4.794629 | 0.809295  |
| C | 1.691050  | -3.598260 | -1.655856 |
| H | 1.262833  | -2.875365 | -2.360749 |
| H | 0.968089  | -4.413705 | -1.522720 |
| H | 2.587796  | -4.032473 | -2.116977 |
| C | -0.055935 | 2.133294  | -0.857039 |
| C | -0.114426 | 2.755431  | -2.115867 |
| C | -0.038565 | 2.986457  | 0.261827  |
| C | -0.155575 | 4.142366  | -2.256994 |
| H | -0.127568 | 2.138762  | -3.018078 |
| C | -0.078449 | 4.374106  | 0.139920  |
| H | 0.008101  | 2.552746  | 1.267032  |
| C | -0.137873 | 4.955166  | -1.125959 |
| H | -0.200781 | 4.592304  | -3.248641 |

|   |           |          |           |
|---|-----------|----------|-----------|
| H | -0.063631 | 5.005906 | 1.028360  |
| H | -0.169435 | 6.039249 | -1.229645 |

DippAl.log

SCF (wB97x) = -1241.19058768

H(0 K)= -1240.551547

H(298 K)= -1240.516158

G(298 K)= -1240.618535

Lowest Frequency = 10.0608cm<sup>-1</sup>

|    |           |           |           |
|----|-----------|-----------|-----------|
| Al | -0.000004 | 0.000281  | -1.006713 |
| N  | -1.401832 | 0.026299  | 0.454094  |
| N  | 1.401854  | -0.025994 | 0.454108  |
| C  | -1.251376 | 0.060418  | 1.782047  |
| C  | 0.000012  | 0.000296  | 2.405979  |
| H  | 0.000014  | 0.000375  | 3.492140  |
| C  | 1.251402  | -0.059940 | 1.782056  |
| C  | -2.464311 | 0.156365  | 2.663770  |
| H  | -3.082208 | 1.019471  | 2.386652  |
| H  | -2.188189 | 0.245390  | 3.717940  |
| H  | -3.109492 | -0.724248 | 2.548205  |
| C  | 2.464340  | -0.155895 | 2.663775  |
| H  | 3.109608  | 0.724634  | 2.548112  |
| H  | 3.082144  | -1.019099 | 2.386729  |
| H  | 2.188229  | -0.244793 | 3.717959  |
| C  | -2.733378 | 0.055535  | -0.078105 |
| C  | -3.268136 | 1.274171  | -0.535936 |
| C  | -4.534866 | 1.259954  | -1.127410 |
| H  | -4.960888 | 2.196563  | -1.488828 |
| C  | -5.252630 | 0.080608  | -1.263252 |
| H  | -6.236300 | 0.089179  | -1.729585 |
| C  | -4.711090 | -1.113990 | -0.800797 |
| H  | -5.278901 | -2.037129 | -0.910117 |
| C  | -3.451138 | -1.152697 | -0.202617 |
| C  | -2.528244 | 2.591534  | -0.399647 |
| H  | -1.574290 | 2.398214  | 0.113698  |
| C  | -2.203762 | 3.188813  | -1.767939 |
| H  | -1.598376 | 2.498608  | -2.369550 |
| H  | -1.647223 | 4.128846  | -1.661961 |
| H  | -3.120110 | 3.407296  | -2.332400 |
| C  | -3.315311 | 3.588039  | 0.450697  |
| H  | -3.542562 | 3.188199  | 1.446766  |
| H  | -4.270943 | 3.848813  | -0.022847 |
| H  | -2.750007 | 4.518868  | 0.582474  |
| C  | -2.852121 | -2.469380 | 0.256831  |
| H  | -2.116954 | -2.250743 | 1.045183  |
| C  | -3.882974 | -3.424597 | 0.849969  |
| H  | -4.478283 | -2.948413 | 1.639033  |
| H  | -3.386087 | -4.301006 | 1.282658  |
| H  | -4.580678 | -3.797987 | 0.089731  |
| C  | -2.094308 | -3.141438 | -0.888733 |
| H  | -1.319453 | -2.479615 | -1.304487 |
| H  | -2.776636 | -3.394288 | -1.710984 |
| H  | -1.607758 | -4.066566 | -0.552848 |
| C  | 2.733361  | -0.055530 | -0.078142 |
| C  | 3.267796  | -1.274308 | -0.535978 |
| C  | 4.534484  | -1.260415 | -1.127551 |
| H  | 4.960252  | -2.197141 | -1.488966 |

|   |          |           |           |
|---|----------|-----------|-----------|
| C | 5.252519 | -0.081247 | -1.263483 |
| H | 6.236149 | -0.090062 | -1.729897 |
| C | 4.711304 | 1.113493  | -0.801010 |
| H | 5.279331 | 2.036491  | -0.910406 |
| C | 3.451410 | 1.152525  | -0.202734 |
| C | 2.527627 | -2.591506 | -0.399523 |
| H | 1.573685 | -2.397909 | 0.113741  |
| C | 2.203088 | -3.188981 | -1.767707 |
| H | 1.597872 | -2.498768 | -2.369480 |
| H | 1.646342 | -4.128873 | -1.661567 |
| H | 3.119402 | -3.407784 | -2.332099 |
| C | 3.314474 | -3.587983 | 0.451061  |
| H | 3.541699 | -3.187992 | 1.447076  |
| H | 4.270111 | -3.848963 | -0.022363 |
| H | 2.749033 | -4.518711 | 0.582964  |
| C | 2.852742 | 2.469367  | 0.256693  |
| H | 2.117488 | 2.250947  | 1.045022  |
| C | 3.883844 | 3.424297  | 0.849875  |
| H | 4.479002 | 2.947935  | 1.638947  |
| H | 3.387183 | 4.300834  | 1.282564  |
| H | 4.581670 | 3.797506  | 0.089661  |
| C | 2.095154 | 3.141639  | -0.888892 |
| H | 1.320096 | 2.480052  | -1.304643 |
| H | 2.777568 | 3.394268  | -1.711140 |
| H | 1.608891 | 4.066926  | -0.553025 |

Int-1a\_PdAl2\_noP.log

SCF (wB97x) = -2610.48002348

H(0 K)= -2609.198428

H(298 K)= -2609.125161

G(298 K)= -2609.306295

Lowest Frequency = 12.2527cm<sup>-1</sup>

|    |          |           |           |
|----|----------|-----------|-----------|
| Pd | 0.014195 | -0.036338 | -1.390243 |
| Al | 2.146010 | -0.185077 | -0.349351 |
| N  | 3.420571 | 1.330505  | -0.209843 |
| N  | 2.869832 | -0.976239 | 1.323809  |
| C  | 4.126326 | 1.693543  | 0.862991  |
| C  | 4.204298 | 0.904222  | 2.020894  |
| H  | 4.816392 | 1.295580  | 2.828160  |
| C  | 3.689289 | -0.383776 | 2.202377  |
| C  | 4.917275 | 2.969753  | 0.843937  |
| H  | 5.566420 | 3.019493  | -0.038928 |
| H  | 5.533066 | 3.070993  | 1.741753  |
| H  | 4.251823 | 3.840292  | 0.782754  |
| C  | 4.108559 | -1.124603 | 3.439344  |
| H  | 3.242216 | -1.363502 | 4.069166  |
| H  | 4.815671 | -0.540449 | 4.034016  |
| H  | 4.572652 | -2.085749 | 3.186103  |
| C  | 3.539268 | 2.112408  | -1.412882 |
| C  | 4.349368 | 1.606009  | -2.454287 |
| C  | 4.472762 | 2.362224  | -3.621531 |
| H  | 5.095021 | 1.994547  | -4.434660 |
| C  | 3.802779 | 3.570472  | -3.773425 |
| H  | 3.912381 | 4.142966  | -4.693020 |
| C  | 2.977328 | 4.029637  | -2.758376 |
| H  | 2.424490 | 4.959809  | -2.890472 |
| C  | 2.824171 | 3.315510  | -1.567081 |

S-60

|    |           |           |           |
|----|-----------|-----------|-----------|
| C  | 5.063221  | 0.272934  | -2.314393 |
| H  | 4.360821  | -0.414913 | -1.808183 |
| C  | 5.409186  | -0.368027 | -3.652255 |
| H  | 4.531329  | -0.446723 | -4.304294 |
| H  | 5.805206  | -1.378333 | -3.495618 |
| H  | 6.183514  | 0.194988  | -4.189507 |
| C  | 6.313611  | 0.369222  | -1.439232 |
| H  | 7.026924  | 1.092806  | -1.857150 |
| H  | 6.821011  | -0.603333 | -1.384402 |
| H  | 6.082861  | 0.675567  | -0.412466 |
| C  | 1.847878  | 3.817779  | -0.525121 |
| H  | 2.005564  | 3.235243  | 0.390869  |
| C  | 0.410817  | 3.569175  | -0.984770 |
| H  | -0.306420 | 3.891694  | -0.218065 |
| H  | 0.230143  | 2.500054  | -1.187621 |
| H  | 0.194696  | 4.127972  | -1.906676 |
| C  | 2.044791  | 5.292000  | -0.177602 |
| H  | 3.075169  | 5.520974  | 0.125602  |
| H  | 1.376658  | 5.578200  | 0.645374  |
| H  | 1.803363  | 5.943843  | -1.027272 |
| C  | 2.560733  | -2.367433 | 1.511964  |
| C  | 1.510293  | -2.773371 | 2.360093  |
| C  | 1.231725  | -4.138638 | 2.463898  |
| H  | 0.416677  | -4.461621 | 3.112672  |
| C  | 1.960417  | -5.086750 | 1.758105  |
| H  | 1.720526  | -6.144602 | 1.852154  |
| C  | 2.993248  | -4.672039 | 0.929381  |
| H  | 3.567819  | -5.411472 | 0.370785  |
| C  | 3.312502  | -3.319001 | 0.789694  |
| C  | 0.664928  | -1.799842 | 3.158462  |
| H  | 1.110660  | -0.799827 | 3.062507  |
| C  | -0.756747 | -1.730503 | 2.601352  |
| H  | -1.205930 | -2.731521 | 2.531309  |
| H  | -0.762385 | -1.290061 | 1.592509  |
| H  | -1.408517 | -1.125272 | 3.245881  |
| C  | 0.623787  | -2.159672 | 4.644224  |
| H  | 0.084993  | -3.100593 | 4.814878  |
| H  | 0.100424  | -1.381124 | 5.213415  |
| H  | 1.625873  | -2.278171 | 5.075230  |
| C  | 4.457748  | -2.933762 | -0.127755 |
| H  | 4.596125  | -1.843700 | -0.071642 |
| C  | 4.136422  | -3.288410 | -1.579164 |
| H  | 3.954459  | -4.365530 | -1.694347 |
| H  | 4.971426  | -3.020131 | -2.239523 |
| H  | 3.239558  | -2.759705 | -1.931574 |
| C  | 5.770888  | -3.578786 | 0.313683  |
| H  | 6.030580  | -3.309934 | 1.345019  |
| H  | 6.596646  | -3.261075 | -0.335035 |
| H  | 5.718098  | -4.674200 | 0.262148  |
| Al | -2.130137 | 0.166548  | -0.373481 |
| N  | -3.363820 | -1.369261 | -0.120430 |
| N  | -2.870219 | 1.056376  | 1.239849  |
| C  | -4.136069 | -1.630895 | 0.933241  |
| C  | -4.195873 | -0.787474 | 2.053121  |
| H  | -4.821083 | -1.123813 | 2.875308  |
| C  | -3.661732 | 0.500272  | 2.169113  |
| C  | -5.052226 | -2.821246 | 0.923812  |
| H  | -5.961639 | -2.590572 | 0.351704  |
| H  | -5.361179 | -3.089043 | 1.938645  |

|   |           |           |           |
|---|-----------|-----------|-----------|
| H | -4.597484 | -3.691793 | 0.440545  |
| C | -4.039749 | 1.286203  | 3.392722  |
| H | -3.162116 | 1.475371  | 4.023672  |
| H | -4.781395 | 0.752299  | 3.992806  |
| H | -4.443064 | 2.271171  | 3.127397  |
| C | -3.508988 | -2.175433 | -1.301366 |
| C | -4.585638 | -1.917627 | -2.173264 |
| C | -4.699326 | -2.686685 | -3.333317 |
| H | -5.524565 | -2.494532 | -4.019611 |
| C | -3.772061 | -3.675691 | -3.632491 |
| H | -3.877242 | -4.268114 | -4.539949 |
| C | -2.699726 | -3.894833 | -2.776926 |
| H | -1.963892 | -4.659318 | -3.022817 |
| C | -2.536746 | -3.149566 | -1.606328 |
| C | -5.566721 | -0.784305 | -1.937911 |
| H | -5.415923 | -0.392416 | -0.921138 |
| C | -5.281378 | 0.357391  | -2.915039 |
| H | -5.429309 | 0.028391  | -3.952294 |
| H | -4.244918 | 0.712630  | -2.829091 |
| H | -5.954110 | 1.206959  | -2.734508 |
| C | -7.023681 | -1.227081 | -2.049982 |
| H | -7.698653 | -0.400816 | -1.793234 |
| H | -7.252912 | -2.068767 | -1.384476 |
| H | -7.272344 | -1.543020 | -3.071355 |
| C | -1.373712 | -3.431433 | -0.676663 |
| H | -1.183083 | -2.516786 | -0.097212 |
| C | -1.726594 | -4.548944 | 0.305290  |
| H | -2.572640 | -4.277686 | 0.950271  |
| H | -0.870184 | -4.774906 | 0.953386  |
| H | -1.997073 | -5.470865 | -0.228760 |
| C | -0.074253 | -3.744867 | -1.409390 |
| H | 0.753002  | -3.799278 | -0.688669 |
| H | 0.171009  | -2.954335 | -2.131215 |
| H | -0.111176 | -4.707837 | -1.938293 |
| C | -2.557992 | 2.453853  | 1.368586  |
| C | -1.552875 | 2.901404  | 2.247729  |
| C | -1.324699 | 4.276229  | 2.354678  |
| H | -0.547161 | 4.631664  | 3.031948  |
| C | -2.052559 | 5.189307  | 1.605391  |
| H | -1.861870 | 6.256815  | 1.704090  |
| C | -3.007887 | 4.730723  | 0.706203  |
| H | -3.555588 | 5.448392  | 0.098304  |
| C | -3.273865 | 3.367253  | 0.562035  |
| C | -0.659895 | 1.949821  | 3.016910  |
| H | -1.075586 | 0.938418  | 2.921094  |
| C | 0.731943  | 1.939340  | 2.385608  |
| H | 1.177675  | 2.944599  | 2.413317  |
| H | 0.681655  | 1.619825  | 1.332739  |
| H | 1.414839  | 1.266299  | 2.921547  |
| C | -0.556611 | 2.286353  | 4.503102  |
| H | 0.027283  | 1.519957  | 5.028861  |
| H | -1.537703 | 2.355441  | 4.989469  |
| H | -0.046849 | 3.245056  | 4.664787  |
| C | -4.323917 | 2.889130  | -0.424198 |
| H | -3.989791 | 1.910886  | -0.811897 |
| C | -4.467222 | 3.805251  | -1.632683 |
| H | -4.921008 | 4.769746  | -1.370199 |
| H | -5.115941 | 3.341698  | -2.385004 |
| H | -3.495086 | 4.002727  | -2.101252 |

|   |           |          |           |
|---|-----------|----------|-----------|
| C | -5.675002 | 2.658765 | 0.253165  |
| H | -6.048562 | 3.586105 | 0.708784  |
| H | -5.614425 | 1.896169 | 1.039578  |
| H | -6.422675 | 2.319628 | -0.476847 |

Int-1b\_PPdAl.log

SCF (wB97x) = -2416.32214567

H(0 K)= -2415.195245

H(298 K)= -2415.136805

G(298 K)= -2415.291314

Lowest Frequency = 8.9592cm<sup>-1</sup>

|    |          |           |           |
|----|----------|-----------|-----------|
| Pd | 0.555083 | -0.336616 | -0.870263 |
| P  | 2.789635 | -0.367893 | -0.239042 |
| C  | 3.527944 | 1.342079  | -0.206795 |
| H  | 4.586142 | 1.275272  | 0.102594  |
| C  | 2.805796 | 2.268314  | 0.775061  |
| H  | 1.729955 | 2.286016  | 0.521740  |
| H  | 2.876062 | 1.880303  | 1.802344  |
| C  | 3.375867 | 3.681631  | 0.727902  |
| H  | 2.837810 | 4.323889  | 1.438772  |
| H  | 4.426914 | 3.661553  | 1.062113  |
| C  | 3.307277 | 4.261344  | -0.678444 |
| H  | 3.733236 | 5.274169  | -0.703042 |
| H  | 2.248289 | 4.357268  | -0.969611 |
| C  | 4.019536 | 3.353814  | -1.673530 |
| H  | 5.097581 | 3.333107  | -1.440668 |
| H  | 3.932267 | 3.753256  | -2.693553 |
| C  | 3.465572 | 1.934679  | -1.620224 |
| H  | 4.001557 | 1.292553  | -2.335091 |
| H  | 2.408479 | 1.932927  | -1.940938 |
| C  | 4.034563 | -1.303882 | -1.283557 |
| H  | 3.723801 | -1.035412 | -2.309500 |
| C  | 5.520294 | -0.950071 | -1.161239 |
| H  | 5.881605 | -1.189688 | -0.149558 |
| H  | 5.679345 | 0.128320  | -1.297904 |
| C  | 6.347232 | -1.719904 | -2.189357 |
| H  | 6.052306 | -1.391942 | -3.199851 |
| H  | 7.411579 | -1.468957 | -2.083003 |
| C  | 6.136170 | -3.224714 | -2.072263 |
| H  | 6.517715 | -3.567214 | -1.096116 |
| H  | 6.720956 | -3.755942 | -2.835354 |
| C  | 4.658449 | -3.580196 | -2.180861 |
| H  | 4.510774 | -4.662048 | -2.060571 |
| H  | 4.295138 | -3.327502 | -3.190046 |
| C  | 3.835952 | -2.816662 | -1.149256 |
| H  | 2.768092 | -3.068230 | -1.230951 |
| H  | 4.154677 | -3.131348 | -0.141521 |
| C  | 2.968559 | -0.927583 | 1.528879  |
| H  | 2.435807 | -0.114687 | 2.053834  |
| C  | 2.168735 | -2.198466 | 1.836064  |
| H  | 1.168141 | -2.117985 | 1.383595  |
| H  | 2.650739 | -3.070255 | 1.367319  |
| C  | 2.082595 | -2.425259 | 3.341230  |
| H  | 1.524702 | -3.346757 | 3.558367  |
| H  | 1.506363 | -1.600735 | 3.794586  |
| C  | 3.468754 | -2.480584 | 3.975608  |
| H  | 3.392522 | -2.610707 | 5.063757  |

|    |           |           |           |
|----|-----------|-----------|-----------|
| H  | 4.001802  | -3.367621 | 3.595344  |
| C  | 4.283379  | -1.234808 | 3.644179  |
| H  | 5.289325  | -1.303595 | 4.080712  |
| H  | 3.804078  | -0.354594 | 4.105083  |
| C  | 4.369332  | -1.012189 | 2.135878  |
| H  | 4.915654  | -1.853539 | 1.677724  |
| H  | 4.952060  | -0.105412 | 1.914602  |
| Al | -1.765588 | 0.128060  | -0.599705 |
| N  | -2.579982 | 1.806516  | 0.018753  |
| N  | -3.458221 | -0.820740 | -0.317778 |
| C  | -3.884217 | 2.074412  | 0.145885  |
| C  | -4.874045 | 1.091058  | 0.012664  |
| H  | -5.903300 | 1.420859  | 0.118340  |
| C  | -4.669576 | -0.286802 | -0.131740 |
| C  | -4.328792 | 3.475074  | 0.454948  |
| H  | -3.840860 | 3.858232  | 1.359694  |
| H  | -5.412426 | 3.529249  | 0.588855  |
| H  | -4.043907 | 4.159926  | -0.354626 |
| C  | -5.864959 | -1.188564 | -0.041176 |
| H  | -5.904083 | -1.881683 | -0.890389 |
| H  | -6.796272 | -0.617288 | -0.003883 |
| H  | -5.809209 | -1.816395 | 0.857796  |
| C  | -1.639504 | 2.839744  | 0.352074  |
| C  | -1.046258 | 2.809991  | 1.631591  |
| C  | -0.191336 | 3.856806  | 1.983739  |
| H  | 0.271608  | 3.861801  | 2.969753  |
| C  | 0.101064  | 4.878991  | 1.088332  |
| H  | 0.767306  | 5.689271  | 1.381585  |
| C  | -0.424333 | 4.841633  | -0.196129 |
| H  | -0.148077 | 5.614949  | -0.913148 |
| C  | -1.293604 | 3.822670  | -0.592448 |
| C  | -1.321601 | 1.672170  | 2.597431  |
| H  | -1.522261 | 0.773415  | 1.990787  |
| C  | -0.117670 | 1.338143  | 3.469714  |
| H  | 0.773071  | 1.154189  | 2.853347  |
| H  | -0.313513 | 0.433182  | 4.057542  |
| H  | 0.118745  | 2.138599  | 4.182833  |
| C  | -2.566343 | 1.927081  | 3.447004  |
| H  | -2.457155 | 2.845024  | 4.040724  |
| H  | -2.739357 | 1.096368  | 4.144536  |
| H  | -3.467929 | 2.030541  | 2.830064  |
| C  | -1.759761 | 3.747535  | -2.031524 |
| H  | -2.587625 | 3.025819  | -2.086641 |
| C  | -0.619126 | 3.210002  | -2.900477 |
| H  | -0.941213 | 3.084659  | -3.942332 |
| H  | -0.257802 | 2.238562  | -2.529869 |
| H  | 0.232432  | 3.905737  | -2.892484 |
| C  | -2.270939 | 5.081444  | -2.568543 |
| H  | -3.065973 | 5.503247  | -1.940063 |
| H  | -2.671771 | 4.960238  | -3.582008 |
| H  | -1.469739 | 5.829148  | -2.627612 |
| C  | -3.320912 | -2.251048 | -0.304353 |
| C  | -3.292737 | -2.964050 | -1.517109 |
| C  | -3.088896 | -4.345401 | -1.466166 |
| H  | -3.061831 | -4.910387 | -2.398339 |
| C  | -2.912275 | -5.004881 | -0.257399 |
| H  | -2.753182 | -6.081712 | -0.239438 |
| C  | -2.930004 | -4.282210 | 0.929269  |
| H  | -2.773980 | -4.798264 | 1.876778  |



|   |           |           |           |
|---|-----------|-----------|-----------|
| C | -3.130290 | -2.900486 | 0.931555  |
| C | -3.454081 | -2.287184 | -2.863287 |
| H | -3.654183 | -1.220535 | -2.686939 |
| C | -2.165624 | -2.389957 | -3.679840 |
| H | -1.922904 | -3.438781 | -3.897868 |
| H | -1.314896 | -1.952939 | -3.139812 |
| H | -2.269491 | -1.866182 | -4.638653 |
| C | -4.637208 | -2.856616 | -3.644905 |
| H | -4.482816 | -3.916147 | -3.887703 |
| H | -4.770258 | -2.320837 | -4.592751 |
| H | -5.576528 | -2.783935 | -3.082274 |
| C | -3.072293 | -2.136061 | 2.240630  |
| H | -3.432763 | -1.112089 | 2.061983  |
| C | -1.624169 | -2.035956 | 2.722844  |
| H | -1.199742 | -3.035076 | 2.891816  |
| H | -1.561192 | -1.481447 | 3.669187  |
| H | -0.983544 | -1.530534 | 1.983327  |
| C | -3.958110 | -2.751015 | 3.321406  |
| H | -4.998315 | -2.857616 | 2.989335  |
| H | -3.954387 | -2.125563 | 4.222816  |
| H | -3.604884 | -3.746971 | 3.618036  |

Int-2a\_cc-PdAl2.log

SCF (wB97x) = -2842.72193682

H(0 K)= -2841.338283

H(298 K)= -2841.259450

G(298 K)= -2841.450825

Lowest Frequency = 12.1959cm<sup>-1</sup>

|    |           |           |           |
|----|-----------|-----------|-----------|
| Pd | -0.014814 | -0.094533 | -1.213913 |
| Al | 1.996596  | -0.102594 | 0.064597  |
| N  | 3.202507  | 1.485748  | 0.202779  |
| N  | 2.685813  | -0.790961 | 1.799894  |
| C  | 3.936741  | 1.864035  | 1.252312  |
| C  | 4.049841  | 1.094672  | 2.418837  |
| H  | 4.702192  | 1.490716  | 3.192279  |
| C  | 3.561562  | -0.201504 | 2.623959  |
| C  | 4.777066  | 3.109023  | 1.178423  |
| H  | 5.710119  | 2.907821  | 0.633880  |
| H  | 5.048414  | 3.459906  | 2.178630  |
| H  | 4.273479  | 3.915483  | 0.635915  |
| C  | 4.140592  | -0.963531 | 3.785528  |
| H  | 3.402407  | -1.581782 | 4.305304  |
| H  | 4.611988  | -0.286452 | 4.503865  |
| H  | 4.914600  | -1.654274 | 3.422784  |
| C  | 3.374481  | 2.199686  | -1.032294 |
| C  | 4.519205  | 1.930432  | -1.813814 |
| C  | 4.671566  | 2.607091  | -3.025429 |
| H  | 5.546177  | 2.405116  | -3.643327 |
| C  | 3.727123  | 3.531017  | -3.456238 |
| H  | 3.867098  | 4.057094  | -4.399393 |
| C  | 2.601364  | 3.773888  | -2.681139 |
| H  | 1.857417  | 4.491421  | -3.025802 |
| C  | 2.389817  | 3.107269  | -1.470414 |
| C  | 5.535087  | 0.879655  | -1.403267 |
| H  | 5.465129  | 0.730014  | -0.316562 |
| C  | 5.193629  | -0.458945 | -2.058068 |
| H  | 4.160772  | -0.766782 | -1.831656 |

S-65

|    |           |           |           |
|----|-----------|-----------|-----------|
| H  | 5.873926  | -1.250223 | -1.713727 |
| H  | 5.279475  | -0.391396 | -3.151662 |
| C  | 6.975144  | 1.279107  | -1.711369 |
| H  | 7.168862  | 1.316557  | -2.790849 |
| H  | 7.673747  | 0.547282  | -1.288236 |
| H  | 7.225549  | 2.264406  | -1.298389 |
| C  | 1.158899  | 3.417387  | -0.643456 |
| H  | 0.960217  | 2.546973  | -0.002980 |
| C  | -0.096674 | 3.616630  | -1.484810 |
| H  | -0.972786 | 3.696438  | -0.827665 |
| H  | -0.262979 | 2.758213  | -2.150238 |
| H  | -0.056925 | 4.533428  | -2.090440 |
| C  | 1.401287  | 4.625831  | 0.260584  |
| H  | 2.217831  | 4.447803  | 0.972147  |
| H  | 0.498106  | 4.859736  | 0.839178  |
| H  | 1.662616  | 5.514175  | -0.331968 |
| C  | 2.337504  | -2.154365 | 2.088210  |
| C  | 1.192355  | -2.426366 | 2.866803  |
| C  | 0.953737  | -3.751265 | 3.240583  |
| H  | 0.095413  | -3.979835 | 3.871237  |
| C  | 1.785425  | -4.784149 | 2.822999  |
| H  | 1.580240  | -5.808493 | 3.129912  |
| C  | 2.855756  | -4.505786 | 1.984632  |
| H  | 3.477250  | -5.321046 | 1.613349  |
| C  | 3.148560  | -3.195603 | 1.595454  |
| C  | 0.268964  | -1.316766 | 3.337733  |
| H  | 0.364749  | -0.486317 | 2.620541  |
| C  | -1.202066 | -1.721118 | 3.355126  |
| H  | -1.407710 | -2.547985 | 4.048078  |
| H  | -1.558243 | -2.019153 | 2.361483  |
| H  | -1.822197 | -0.876499 | 3.683334  |
| C  | 0.678152  | -0.798415 | 4.717317  |
| H  | 0.698600  | -1.614261 | 5.453449  |
| H  | -0.040005 | -0.048190 | 5.073997  |
| H  | 1.668399  | -0.328014 | 4.709815  |
| C  | 4.272575  | -2.955528 | 0.604955  |
| H  | 4.435760  | -1.869616 | 0.519544  |
| C  | 3.853773  | -3.472063 | -0.774713 |
| H  | 3.606802  | -4.541950 | -0.731504 |
| H  | 4.660436  | -3.340968 | -1.507566 |
| H  | 2.966756  | -2.938235 | -1.146060 |
| C  | 5.591755  | -3.587375 | 1.042482  |
| H  | 5.901706  | -3.247855 | 2.038789  |
| H  | 6.392658  | -3.334369 | 0.336549  |
| H  | 5.524722  | -4.682595 | 1.075929  |
| Al | -2.071554 | 0.142883  | -0.059137 |
| N  | -3.298917 | -1.429320 | 0.111088  |
| N  | -3.023208 | 1.063151  | 1.414366  |
| C  | -4.217253 | -1.647498 | 1.050677  |
| C  | -4.414969 | -0.770179 | 2.130604  |
| H  | -5.130987 | -1.087989 | 2.883256  |
| C  | -3.901196 | 0.522828  | 2.272724  |
| C  | -5.144815 | -2.825116 | 0.947667  |
| H  | -5.964552 | -2.594355 | 0.253003  |
| H  | -5.593351 | -3.060670 | 1.917481  |
| H  | -4.645650 | -3.715963 | 0.553276  |
| C  | -4.398170 | 1.337377  | 3.432866  |
| H  | -3.577325 | 1.564513  | 4.125820  |
| H  | -5.176331 | 0.807060  | 3.988437  |

|   |           |           |           |
|---|-----------|-----------|-----------|
| H | -4.797663 | 2.304513  | 3.103494  |
| C | -3.261538 | -2.285670 | -1.042511 |
| C | -4.181780 | -2.078219 | -2.088716 |
| C | -4.104652 | -2.899143 | -3.217254 |
| H | -4.808954 | -2.743794 | -4.035031 |
| C | -3.141611 | -3.893409 | -3.318717 |
| H | -3.098225 | -4.526597 | -4.203395 |
| C | -2.219948 | -4.062490 | -2.292287 |
| H | -1.450426 | -4.827474 | -2.383815 |
| C | -2.248526 | -3.261693 | -1.147776 |
| C | -5.193675 | -0.949150 | -2.072262 |
| H | -5.196313 | -0.492058 | -1.071112 |
| C | -4.774063 | 0.130582  | -3.070968 |
| H | -4.733612 | -0.276277 | -4.090383 |
| H | -3.777251 | 0.529732  | -2.833082 |
| H | -5.488946 | 0.964149  | -3.072366 |
| C | -6.613816 | -1.425788 | -2.369905 |
| H | -7.328711 | -0.599831 | -2.266810 |
| H | -6.929781 | -2.231809 | -1.695909 |
| H | -6.703910 | -1.806249 | -3.395600 |
| C | -1.243293 | -3.476384 | -0.036269 |
| H | -1.069328 | -2.498034 | 0.439396  |
| C | -1.799725 | -4.434217 | 1.017516  |
| H | -2.692509 | -4.029856 | 1.511984  |
| H | -1.049835 | -4.628531 | 1.794250  |
| H | -2.074622 | -5.397023 | 0.563968  |
| C | 0.118917  | -3.939123 | -0.532175 |
| H | 0.831159  | -3.946965 | 0.301366  |
| H | 0.507553  | -3.248960 | -1.292970 |
| H | 0.097386  | -4.955928 | -0.950141 |
| C | -2.779923 | 2.478395  | 1.477632  |
| C | -1.842551 | 3.028392  | 2.373401  |
| C | -1.660907 | 4.415072  | 2.376696  |
| H | -0.933909 | 4.850346  | 3.063105  |
| C | -2.374508 | 5.242319  | 1.523207  |
| H | -2.220379 | 6.319868  | 1.546616  |
| C | -3.269952 | 4.683366  | 0.619966  |
| H | -3.805854 | 5.333171  | -0.068896 |
| C | -3.479483 | 3.303927  | 0.564794  |
| C | -0.994306 | 2.191234  | 3.311023  |
| H | -1.359791 | 1.153970  | 3.274669  |
| C | 0.463930  | 2.185575  | 2.848962  |
| H | 0.859526  | 3.208838  | 2.780774  |
| H | 0.560032  | 1.723347  | 1.855566  |
| H | 1.103298  | 1.627855  | 3.545756  |
| C | -1.084984 | 2.684386  | 4.755689  |
| H | -0.533093 | 2.018263  | 5.430412  |
| H | -2.120736 | 2.746086  | 5.112529  |
| H | -0.645216 | 3.683922  | 4.864861  |
| C | -4.436990 | 2.717921  | -0.458241 |
| H | -4.024664 | 1.741389  | -0.769134 |
| C | -4.546798 | 3.565275  | -1.720267 |
| H | -5.055483 | 4.520222  | -1.535396 |
| H | -5.132631 | 3.037412  | -2.481047 |
| H | -3.559574 | 3.782482  | -2.147059 |
| C | -5.821567 | 2.452530  | 0.133680  |
| H | -6.268410 | 3.380393  | 0.516600  |
| H | -5.787324 | 1.728095  | 0.956215  |
| H | -6.497558 | 2.047712  | -0.631878 |

|   |           |           |           |
|---|-----------|-----------|-----------|
| H | -0.980674 | 0.853310  | -3.646602 |
| C | -0.107987 | 0.211485  | -3.726540 |
| C | 1.149461  | 0.756317  | -4.013995 |
| C | -0.247178 | -1.178957 | -3.589747 |
| C | 2.248418  | -0.078767 | -4.209332 |
| H | 1.265364  | 1.835634  | -4.100157 |
| C | 0.865469  | -2.007786 | -3.770538 |
| H | -1.227519 | -1.609074 | -3.381936 |
| C | 2.105893  | -1.460815 | -4.096750 |
| H | 3.220177  | 0.358825  | -4.435995 |
| H | 0.751934  | -3.086715 | -3.665122 |
| H | 2.969581  | -2.111978 | -4.231501 |

Int-2a-toluene\_meta1.log

SCF (wB97x) = -2882.03133019

H(0 K)= -2880.620288

H(298 K)= -2880.539663

G(298 K)= -2880.734444

Lowest Frequency = 20.9116cm<sup>-1</sup>

|    |           |           |           |
|----|-----------|-----------|-----------|
| Pd | 0.009527  | -0.139941 | 1.127364  |
| Al | -1.967477 | -0.137169 | -0.190025 |
| N  | -3.125561 | 1.466017  | -0.388406 |
| N  | -2.604239 | -0.813366 | -1.959126 |
| C  | -3.751765 | 1.897934  | -1.485934 |
| C  | -3.862770 | 1.120519  | -2.646298 |
| H  | -4.448899 | 1.544733  | -3.456562 |
| C  | -3.433474 | -0.201853 | -2.814157 |
| C  | -4.417954 | 3.243960  | -1.487384 |
| H  | -5.121264 | 3.345932  | -0.651701 |
| H  | -4.953925 | 3.424166  | -2.423389 |
| H  | -3.672195 | 4.039177  | -1.357599 |
| C  | -4.015561 | -0.957850 | -3.977611 |
| H  | -3.295471 | -1.624204 | -4.462473 |
| H  | -4.429737 | -0.272797 | -4.723277 |
| H  | -4.837074 | -1.597375 | -3.624316 |
| C  | -3.341587 | 2.178619  | 0.840253  |
| C  | -4.328446 | 1.669461  | 1.713971  |
| C  | -4.606756 | 2.382965  | 2.880722  |
| H  | -5.384843 | 2.025117  | 3.553670  |
| C  | -3.899968 | 3.534891  | 3.208824  |
| H  | -4.131137 | 4.074369  | 4.126345  |
| C  | -2.884852 | 3.977693  | 2.373200  |
| H  | -2.304712 | 4.859639  | 2.646855  |
| C  | -2.584506 | 3.314857  | 1.179505  |
| C  | -5.080599 | 0.390313  | 1.389851  |
| H  | -4.401990 | -0.244504 | 0.793032  |
| C  | -5.438137 | -0.420387 | 2.629384  |
| H  | -4.541776 | -0.663572 | 3.213157  |
| H  | -5.917599 | -1.362837 | 2.337918  |
| H  | -6.144003 | 0.103650  | 3.286978  |
| C  | -6.316776 | 0.654442  | 0.530830  |
| H  | -7.024273 | 1.314245  | 1.051773  |
| H  | -6.839542 | -0.285109 | 0.304584  |
| H  | -6.058458 | 1.125525  | -0.425644 |
| C  | -1.429322 | 3.802567  | 0.331535  |
| H  | -1.438585 | 3.234856  | -0.608161 |
| C  | -0.101137 | 3.508280  | 1.029554  |

|    |           |           |           |
|----|-----------|-----------|-----------|
| H  | 0.744973  | 3.828962  | 0.405954  |
| H  | 0.015870  | 2.430328  | 1.222940  |
| H  | -0.036858 | 4.040137  | 1.991098  |
| C  | -1.526037 | 5.287753  | -0.012512 |
| H  | -2.477423 | 5.549593  | -0.494012 |
| H  | -0.711202 | 5.571623  | -0.691251 |
| H  | -1.433150 | 5.915080  | 0.884097  |
| C  | -2.287891 | -2.188409 | -2.222877 |
| C  | -1.099230 | -2.498237 | -2.917208 |
| C  | -0.852966 | -3.837173 | -3.229384 |
| H  | 0.044399  | -4.096626 | -3.789502 |
| C  | -1.724931 | -4.845902 | -2.834903 |
| H  | -1.508462 | -5.883076 | -3.086087 |
| C  | -2.860021 | -4.526229 | -2.102902 |
| H  | -3.527152 | -5.320505 | -1.767540 |
| C  | -3.164894 | -3.199838 | -1.784910 |
| C  | -0.146053 | -1.409057 | -3.374351 |
| H  | -0.229874 | -0.578501 | -2.654394 |
| C  | 1.316106  | -1.840559 | -3.391845 |
| H  | 1.512925  | -2.633969 | -4.125616 |
| H  | 1.655066  | -2.196829 | -2.411764 |
| H  | 1.954812  | -0.991517 | -3.669666 |
| C  | -0.535449 | -0.878405 | -4.755286 |
| H  | -0.569396 | -1.693542 | -5.491703 |
| H  | 0.202520  | -0.145004 | -5.106331 |
| H  | -1.514647 | -0.385901 | -4.754258 |
| C  | -4.391011 | -2.897459 | -0.944814 |
| H  | -4.568603 | -1.811340 | -0.970752 |
| C  | -4.138240 | -3.289710 | 0.512799  |
| H  | -3.903146 | -4.360213 | 0.592515  |
| H  | -5.025538 | -3.093845 | 1.128995  |
| H  | -3.294274 | -2.730686 | 0.942828  |
| C  | -5.650783 | -3.580646 | -1.472107 |
| H  | -5.834271 | -3.350290 | -2.529198 |
| H  | -6.529485 | -3.259288 | -0.899154 |
| H  | -5.588684 | -4.672817 | -1.381422 |
| Al | 2.073280  | 0.099527  | -0.020141 |
| N  | 3.316753  | -1.456703 | -0.158159 |
| N  | 3.049205  | 1.038907  | -1.461576 |
| C  | 4.252546  | -1.668590 | -1.081924 |
| C  | 4.471147  | -0.782242 | -2.150685 |
| H  | 5.201866  | -1.094173 | -2.891676 |
| C  | 3.953434  | 0.509229  | -2.298913 |
| C  | 5.171337  | -2.851842 | -0.972712 |
| H  | 4.658542  | -3.739909 | -0.589067 |
| H  | 5.984571  | -2.632770 | -0.266989 |
| H  | 5.629663  | -3.086559 | -1.938143 |
| C  | 4.465734  | 1.331149  | -3.446853 |
| H  | 3.657493  | 1.540617  | -4.160395 |
| H  | 5.267585  | 0.815255  | -3.981947 |
| H  | 4.836885  | 2.306698  | -3.109683 |
| C  | 3.275109  | -2.290083 | 1.012240  |
| C  | 4.202673  | -2.066941 | 2.050019  |
| C  | 4.114976  | -2.848808 | 3.205258  |
| H  | 4.824246  | -2.677874 | 4.015533  |
| C  | 3.131481  | -3.817482 | 3.345139  |
| H  | 3.076971  | -4.417606 | 4.251982  |
| C  | 2.203640  | -4.001604 | 2.327599  |
| H  | 1.419850  | -4.748351 | 2.445790  |

|   |           |           |           |
|---|-----------|-----------|-----------|
| C | 2.243079  | -3.242119 | 1.155603  |
| C | 5.225657  | -0.948447 | 2.006300  |
| H | 5.230783  | -0.509619 | 0.997184  |
| C | 4.815534  | 0.152703  | 2.985338  |
| H | 4.777413  | -0.233141 | 4.012895  |
| H | 3.818865  | 0.551406  | 2.745565  |
| H | 5.533963  | 0.982910  | 2.966132  |
| C | 6.642435  | -1.429628 | 2.312340  |
| H | 7.363163  | -0.611043 | 2.192157  |
| H | 6.952432  | -2.251239 | 1.654690  |
| H | 6.730435  | -1.790065 | 3.345392  |
| C | 1.231810  | -3.492638 | 0.057143  |
| H | 1.086049  | -2.542911 | -0.481106 |
| C | 1.771668  | -4.531101 | -0.926876 |
| H | 2.681477  | -4.182404 | -1.433540 |
| H | 1.026195  | -4.757536 | -1.698440 |
| H | 2.016691  | -5.468429 | -0.407841 |
| C | -0.144026 | -3.890397 | 0.577797  |
| H | -0.863248 | -3.904641 | -0.251206 |
| H | -0.507289 | -3.163257 | 1.317622  |
| H | -0.150351 | -4.892504 | 1.030184  |
| C | 2.785995  | 2.451280  | -1.526999 |
| C | 1.847728  | 2.985552  | -2.430649 |
| C | 1.633217  | 4.367660  | -2.430212 |
| H | 0.901814  | 4.788842  | -3.120718 |
| C | 2.325818  | 5.207618  | -1.571888 |
| H | 2.151909  | 6.282334  | -1.595243 |
| C | 3.224188  | 4.664037  | -0.661957 |
| H | 3.741462  | 5.322578  | 0.032847  |
| C | 3.456169  | 3.288323  | -0.603526 |
| C | 1.022133  | 2.131743  | -3.371761 |
| H | 1.398726  | 1.098200  | -3.322992 |
| C | -0.437564 | 2.115412  | -2.917560 |
| H | -0.855586 | 3.133292  | -2.900929 |
| H | -0.526325 | 1.701737  | -1.901643 |
| H | -1.063593 | 1.513276  | -3.588241 |
| C | 1.119955  | 2.614368  | -4.819005 |
| H | 0.565293  | 1.948037  | -5.491122 |
| H | 2.157333  | 2.666071  | -5.172771 |
| H | 0.688291  | 3.616659  | -4.935191 |
| C | 4.401738  | 2.718948  | 0.438897  |
| H | 4.014135  | 1.724489  | 0.721098  |
| C | 4.437570  | 3.550315  | 1.715820  |
| H | 4.914341  | 4.526976  | 1.562890  |
| H | 5.015748  | 3.034274  | 2.490262  |
| H | 3.427286  | 3.722934  | 2.108893  |
| C | 5.811094  | 2.507661  | -0.114209 |
| H | 6.241414  | 3.455190  | -0.466551 |
| H | 5.821787  | 1.799043  | -0.951509 |
| H | 6.475887  | 2.106997  | 0.663340  |
| H | 0.998470  | 1.201254  | 3.371099  |
| C | 0.275535  | 0.450133  | 3.679875  |
| C | -0.939349 | 0.836860  | 4.249012  |
| C | 0.586837  | -0.912256 | 3.546363  |
| C | -1.846369 | -0.115284 | 4.730245  |
| H | -1.174995 | 1.898381  | 4.342738  |
| C | -0.345736 | -1.866409 | 3.961396  |
| H | 1.557193  | -1.221152 | 3.155350  |
| C | -1.540881 | -1.468784 | 4.556768  |

|   |           |           |          |
|---|-----------|-----------|----------|
| H | -0.118822 | -2.925402 | 3.838949 |
| H | -2.253039 | -2.221568 | 4.898269 |
| C | -3.088077 | 0.309518  | 5.454491 |
| H | -3.793155 | -0.521332 | 5.575971 |
| H | -2.852196 | 0.682681  | 6.460976 |
| H | -3.606671 | 1.120857  | 4.929282 |

Int-2a-toluene\_meta2.log

SCF (wB97x) = -2882.03389892

H(0 K)= -2880.622736

H(298 K)= -2880.542252

G(298 K)= -2880.736069

Lowest Frequency = 22.7697cm-1

|    |           |           |           |
|----|-----------|-----------|-----------|
| Pd | -0.028444 | -0.239648 | -1.120646 |
| Al | 1.984240  | -0.079502 | 0.139834  |
| N  | 3.221707  | 1.475946  | 0.115666  |
| N  | 2.640796  | -0.576712 | 1.952474  |
| C  | 3.850551  | 2.026705  | 1.158421  |
| C  | 3.953695  | 1.387496  | 2.401000  |
| H  | 4.557451  | 1.888479  | 3.152425  |
| C  | 3.504692  | 0.099074  | 2.719218  |
| C  | 4.545709  | 3.348127  | 1.000387  |
| H  | 5.266926  | 3.324046  | 0.173865  |
| H  | 5.069230  | 3.636621  | 1.916075  |
| H  | 3.822408  | 4.135653  | 0.752369  |
| C  | 4.101176  | -0.547308 | 3.939403  |
| H  | 3.376758  | -1.132701 | 4.514161  |
| H  | 4.561821  | 0.197988  | 4.594522  |
| H  | 4.888828  | -1.249597 | 3.631032  |
| C  | 3.446394  | 2.038097  | -1.188218 |
| C  | 4.420588  | 1.417797  | -2.003970 |
| C  | 4.686247  | 1.977448  | -3.255134 |
| H  | 5.439966  | 1.521851  | -3.895517 |
| C  | 3.990041  | 3.091919  | -3.710632 |
| H  | 4.212095  | 3.511109  | -4.690817 |
| C  | 2.996049  | 3.649698  | -2.919836 |
| H  | 2.424583  | 4.501570  | -3.290227 |
| C  | 2.701302  | 3.137526  | -1.652714 |
| C  | 5.150875  | 0.168779  | -1.539303 |
| H  | 4.414393  | -0.444769 | -0.987927 |
| C  | 5.663869  | -0.694477 | -2.685506 |
| H  | 4.868949  | -0.932641 | -3.402059 |
| H  | 6.059557  | -1.639746 | -2.293696 |
| H  | 6.484289  | -0.210429 | -3.231706 |
| C  | 6.299029  | 0.483008  | -0.578388 |
| H  | 7.037888  | 1.139282  | -1.058813 |
| H  | 6.817043  | -0.440047 | -0.284421 |
| H  | 5.957785  | 0.972079  | 0.340482  |
| C  | 1.561829  | 3.741462  | -0.859545 |
| H  | 1.573527  | 3.293374  | 0.142412  |
| C  | 0.220794  | 3.385522  | -1.502025 |
| H  | -0.611501 | 3.796287  | -0.914548 |
| H  | 0.082807  | 2.294160  | -1.560367 |
| H  | 0.152477  | 3.797344  | -2.520481 |
| C  | 1.682981  | 5.256005  | -0.700341 |
| H  | 2.643724  | 5.560381  | -0.264578 |
| H  | 0.880374  | 5.632728  | -0.052851 |

|    |           |           |           |
|----|-----------|-----------|-----------|
| H  | 1.587407  | 5.770667  | -1.665728 |
| C  | 2.288869  | -1.905339 | 2.367209  |
| C  | 1.121991  | -2.097285 | 3.137403  |
| C  | 0.847502  | -3.386404 | 3.599376  |
| H  | -0.034533 | -3.554341 | 4.215953  |
| C  | 1.670238  | -4.461311 | 3.280040  |
| H  | 1.433798  | -5.457659 | 3.650507  |
| C  | 2.775159  | -4.263291 | 2.463611  |
| H  | 3.395908  | -5.113494 | 2.180769  |
| C  | 3.104637  | -2.990051 | 1.990267  |
| C  | 0.212431  | -0.935011 | 3.493525  |
| H  | 0.272490  | -0.212151 | 2.662903  |
| C  | -1.253352 | -1.329798 | 3.641293  |
| H  | -1.425719 | -1.981269 | 4.508866  |
| H  | -1.637017 | -1.844914 | 2.752574  |
| H  | -1.870878 | -0.434099 | 3.792640  |
| C  | 0.674195  | -0.229458 | 4.769805  |
| H  | 0.730786  | -0.937449 | 5.608589  |
| H  | -0.037140 | 0.559135  | 5.049440  |
| H  | 1.658222  | 0.239894  | 4.659292  |
| C  | 4.275719  | -2.823932 | 1.040174  |
| H  | 4.502941  | -1.749573 | 0.959484  |
| C  | 3.885159  | -3.319723 | -0.355835 |
| H  | 3.613023  | -4.384484 | -0.328779 |
| H  | 4.717592  | -3.201177 | -1.062708 |
| H  | 3.021932  | -2.764063 | -0.752234 |
| C  | 5.541893  | -3.523588 | 1.526911  |
| H  | 5.825972  | -3.205439 | 2.537912  |
| H  | 6.382126  | -3.306070 | 0.855774  |
| H  | 5.421827  | -4.614431 | 1.547786  |
| Al | -2.086853 | 0.152446  | -0.017342 |
| N  | -3.389707 | -1.305483 | 0.377198  |
| N  | -2.988707 | 1.334916  | 1.297660  |
| C  | -4.284926 | -1.354133 | 1.362685  |
| C  | -4.443198 | -0.311886 | 2.290612  |
| H  | -5.156690 | -0.484932 | 3.091306  |
| C  | -3.887542 | 0.970929  | 2.223479  |
| C  | -5.221705 | -2.522843 | 1.475032  |
| H  | -5.672213 | -2.575116 | 2.470563  |
| H  | -4.722890 | -3.472072 | 1.252201  |
| H  | -6.038145 | -2.425691 | 0.746239  |
| C  | -4.356498 | 1.976824  | 3.235880  |
| H  | -3.530542 | 2.277946  | 3.893501  |
| H  | -5.158514 | 1.571858  | 3.858857  |
| H  | -4.713470 | 2.895254  | 2.753849  |
| C  | -3.426397 | -2.311055 | -0.648563 |
| C  | -4.385032 | -2.204562 | -1.676998 |
| C  | -4.395039 | -3.172086 | -2.684459 |
| H  | -5.129028 | -3.094554 | -3.487063 |
| C  | -3.482420 | -4.218156 | -2.685899 |
| H  | -3.509710 | -4.970208 | -3.472855 |
| C  | -2.523078 | -4.289105 | -1.683785 |
| H  | -1.798929 | -5.103389 | -1.689852 |
| C  | -2.458745 | -3.336025 | -0.663225 |
| C  | -5.342904 | -1.033380 | -1.778684 |
| H  | -5.276265 | -0.440797 | -0.854030 |
| C  | -4.920268 | -0.129216 | -2.937471 |
| H  | -4.958938 | -0.673440 | -3.890605 |
| H  | -3.891035 | 0.235629  | -2.806318 |



|   |           |           |           |
|---|-----------|-----------|-----------|
| H | -5.587383 | 0.738992  | -3.021520 |
| C | -6.796615 | -1.469496 | -1.947627 |
| H | -7.464559 | -0.599032 | -1.940946 |
| H | -7.120845 | -2.148339 | -1.149010 |
| H | -6.952922 | -1.990776 | -2.900911 |
| C | -1.402992 | -3.461129 | 0.414889  |
| H | -1.287215 | -2.472433 | 0.882264  |
| C | -1.850861 | -4.454065 | 1.487607  |
| H | -2.768360 | -4.125539 | 1.994196  |
| H | -1.072450 | -4.576676 | 2.250404  |
| H | -2.049983 | -5.441254 | 1.047768  |
| C | -0.028885 | -3.821888 | -0.136378 |
| H | 0.713871  | -3.798855 | 0.671557  |
| H | 0.285486  | -3.089974 | -0.894698 |
| H | 0.000105  | -4.827309 | -0.580618 |
| C | -2.675908 | 2.730982  | 1.156943  |
| C | -1.714313 | 3.356584  | 1.973717  |
| C | -1.465597 | 4.719902  | 1.785234  |
| H | -0.717320 | 5.211374  | 2.407990  |
| C | -2.144611 | 5.454073  | 0.824624  |
| H | -1.943700 | 6.517298  | 0.701936  |
| C | -3.062919 | 4.816051  | 0.000089  |
| H | -3.569282 | 5.387761  | -0.775129 |
| C | -3.331209 | 3.451947  | 0.131098  |
| C | -0.897969 | 2.613982  | 3.012822  |
| H | -1.302484 | 1.594338  | 3.109411  |
| C | 0.552858  | 2.494574  | 2.545579  |
| H | 0.998078  | 3.488769  | 2.389360  |
| H | 0.610808  | 1.948354  | 1.591878  |
| H | 1.173815  | 1.967681  | 3.281012  |
| C | -0.955010 | 3.288509  | 4.383504  |
| H | -0.411214 | 2.697679  | 5.130986  |
| H | -1.983264 | 3.423535  | 4.741639  |
| H | -0.487829 | 4.281296  | 4.359793  |
| C | -4.307340 | 2.774330  | -0.813966 |
| H | -3.963150 | 1.734166  | -0.949908 |
| C | -4.321918 | 3.411003  | -2.198756 |
| H | -4.757358 | 4.418406  | -2.189107 |
| H | -4.927212 | 2.811021  | -2.887418 |
| H | -3.309113 | 3.482320  | -2.615862 |
| C | -5.717613 | 2.704919  | -0.228411 |
| H | -6.104476 | 3.710847  | -0.014857 |
| H | -5.746675 | 2.126597  | 0.703467  |
| H | -6.407881 | 2.224475  | -0.935245 |
| H | -1.009571 | 0.594935  | -3.518390 |
| C | -0.133381 | -0.035440 | -3.644491 |
| C | 1.095379  | 0.523777  | -4.009506 |
| C | -0.246758 | -1.426851 | -3.484756 |
| C | 2.184098  | -0.309711 | -4.260577 |
| H | 1.198425  | 1.603772  | -4.108787 |
| C | 0.851571  | -2.267234 | -3.717817 |
| H | -1.211311 | -1.863888 | -3.214340 |
| C | 2.060990  | -1.688173 | -4.120210 |
| H | 2.920789  | -2.333816 | -4.309913 |
| H | 3.136233  | 0.127366  | -4.558569 |
| C | 0.730357  | -3.754957 | -3.579255 |
| H | -0.265828 | -4.042791 | -3.224031 |
| H | 0.906244  | -4.264027 | -4.536651 |
| H | 1.464363  | -4.156070 | -2.866940 |

Int-2a-toluene\_ortho1.log

SCF (wB97x) = -2882.03252879

H(0 K)= -2880.621261

H(298 K)= -2880.540790

G(298 K)= -2880.734823

Lowest Frequency = 19.0316cm<sup>-1</sup>

|    |           |           |           |
|----|-----------|-----------|-----------|
| Pd | 0.033438  | -0.164549 | 1.177654  |
| Al | -1.971855 | -0.158422 | -0.105176 |
| N  | -3.272378 | 1.337387  | -0.283276 |
| N  | -2.603724 | -0.921726 | -1.836095 |
| C  | -3.920901 | 1.714716  | -1.391528 |
| C  | -3.988488 | 0.914488  | -2.538793 |
| H  | -4.611727 | 1.285069  | -3.347553 |
| C  | -3.487756 | -0.385798 | -2.685222 |
| C  | -4.695290 | 3.001436  | -1.408273 |
| H  | -5.430900 | 3.030706  | -0.594344 |
| H  | -5.217974 | 3.138216  | -2.358857 |
| H  | -4.032007 | 3.861355  | -1.251321 |
| C  | -4.057353 | -1.206808 | -3.809921 |
| H  | -3.314580 | -1.845542 | -4.297590 |
| H  | -4.531498 | -0.568269 | -4.561155 |
| H  | -4.830154 | -1.880764 | -3.413299 |
| C  | -3.508805 | 2.093943  | 0.917391  |
| C  | -4.424825 | 1.569908  | 1.858375  |
| C  | -4.711639 | 2.334294  | 2.992344  |
| H  | -5.421332 | 1.956679  | 3.725965  |
| C  | -4.101424 | 3.564526  | 3.210156  |
| H  | -4.344423 | 4.143978  | 4.099419  |
| C  | -3.161842 | 4.034637  | 2.304016  |
| H  | -2.651465 | 4.978988  | 2.494849  |
| C  | -2.841142 | 3.311667  | 1.151587  |
| C  | -5.065353 | 0.205550  | 1.659506  |
| H  | -4.260606 | -0.474254 | 1.315884  |
| C  | -5.628598 | -0.387823 | 2.945815  |
| H  | -4.905241 | -0.357402 | 3.768165  |
| H  | -5.912428 | -1.434920 | 2.784662  |
| H  | -6.533340 | 0.141433  | 3.274304  |
| C  | -6.162491 | 0.205002  | 0.592066  |
| H  | -6.959086 | 0.914212  | 0.856551  |
| H  | -6.619859 | -0.791216 | 0.519231  |
| H  | -5.791145 | 0.466636  | -0.404190 |
| C  | -1.746524 | 3.814761  | 0.234749  |
| H  | -1.802029 | 3.243516  | -0.699861 |
| C  | -0.376510 | 3.537121  | 0.854797  |
| H  | 0.428282  | 3.846732  | 0.174890  |
| H  | -0.239623 | 2.464462  | 1.068937  |
| H  | -0.257195 | 4.091428  | 1.797647  |
| C  | -1.880065 | 5.294396  | -0.116856 |
| H  | -2.864564 | 5.541102  | -0.536380 |
| H  | -1.115875 | 5.575514  | -0.853136 |
| H  | -1.729622 | 5.936131  | 0.761179  |
| C  | -2.218296 | -2.284675 | -2.073506 |
| C  | -1.053289 | -2.547921 | -2.824384 |
| C  | -0.762509 | -3.878137 | -3.135572 |
| H  | 0.116491  | -4.104090 | -3.737796 |
| C  | -1.567601 | -4.919627 | -2.686884 |

|    |           |           |           |
|----|-----------|-----------|-----------|
| H  | -1.319464 | -5.948930 | -2.941433 |
| C  | -2.669532 | -4.643560 | -1.888780 |
| H  | -3.275873 | -5.463731 | -1.504351 |
| C  | -3.015472 | -3.328552 | -1.565052 |
| C  | -0.169671 | -1.421487 | -3.329511 |
| H  | -0.241879 | -0.600514 | -2.596548 |
| C  | 1.303476  | -1.801297 | -3.438140 |
| H  | 1.484104  | -2.558156 | -4.213558 |
| H  | 1.705476  | -2.184989 | -2.493159 |
| H  | 1.899564  | -0.920585 | -3.712804 |
| C  | -0.652851 | -0.894235 | -4.682071 |
| H  | -0.702085 | -1.705743 | -5.421716 |
| H  | 0.042527  | -0.136934 | -5.067736 |
| H  | -1.644539 | -0.431298 | -4.624655 |
| C  | -4.190909 | -3.066600 | -0.642109 |
| H  | -4.432011 | -1.993086 | -0.687648 |
| C  | -3.801297 | -3.387483 | 0.803797  |
| H  | -3.527522 | -4.446908 | 0.909095  |
| H  | -4.637361 | -3.185199 | 1.487900  |
| H  | -2.940262 | -2.786772 | 1.131743  |
| C  | -5.445860 | -3.835878 | -1.046266 |
| H  | -5.729287 | -3.644703 | -2.088959 |
| H  | -6.292503 | -3.551998 | -0.409119 |
| H  | -5.311082 | -4.919668 | -0.936700 |
| Al | 2.087425  | 0.155266  | 0.038749  |
| N  | 3.411435  | -1.322238 | -0.193387 |
| N  | 2.954283  | 1.179484  | -1.431318 |
| C  | 4.313745  | -1.468013 | -1.162749 |
| C  | 4.452518  | -0.543471 | -2.210123 |
| H  | 5.176861  | -0.794497 | -2.979750 |
| C  | 3.866651  | 0.723734  | -2.302633 |
| C  | 5.285201  | -2.613392 | -1.127221 |
| H  | 5.743315  | -2.774167 | -2.107573 |
| H  | 4.816116  | -3.543202 | -0.789099 |
| H  | 6.093874  | -2.400136 | -0.414504 |
| C  | 4.324955  | 1.607423  | -3.428321 |
| H  | 3.499772  | 1.814666  | -4.121990 |
| H  | 5.137123  | 1.142409  | -3.993495 |
| H  | 4.665310  | 2.582857  | -3.059408 |
| C  | 3.466503  | -2.204014 | 0.940044  |
| C  | 4.401440  | -1.944118 | 1.963168  |
| C  | 4.432892  | -2.795735 | 3.070065  |
| H  | 5.147135  | -2.599312 | 3.870219  |
| C  | 3.572539  | -3.881063 | 3.167131  |
| H  | 3.619699  | -4.542840 | 4.030367  |
| C  | 2.638060  | -4.104952 | 2.164426  |
| H  | 1.948210  | -4.943753 | 2.251910  |
| C  | 2.546056  | -3.266019 | 1.050023  |
| C  | 5.325410  | -0.741158 | 1.935445  |
| H  | 5.256680  | -0.266528 | 0.945062  |
| C  | 4.871007  | 0.288974  | 2.970154  |
| H  | 4.888342  | -0.138819 | 3.981595  |
| H  | 3.845310  | 0.630891  | 2.770460  |
| H  | 5.533156  | 1.165233  | 2.966992  |
| C  | 6.787286  | -1.117744 | 2.168331  |
| H  | 7.435157  | -0.239377 | 2.055846  |
| H  | 7.134490  | -1.884635 | 1.464707  |
| H  | 6.945980  | -1.510107 | 3.181144  |
| C  | 1.508490  | -3.547613 | -0.017263 |

|   |           |           |           |
|---|-----------|-----------|-----------|
| H | 1.351951  | -2.616552 | -0.581659 |
| C | 2.013257  | -4.619533 | -0.983888 |
| H | 2.917891  | -4.300004 | -1.518179 |
| H | 1.247967  | -4.854581 | -1.733588 |
| H | 2.254727  | -5.547542 | -0.447046 |
| C | 0.145148  | -3.919645 | 0.554721  |
| H | -0.573634 | -4.058800 | -0.261916 |
| H | -0.236968 | -3.114873 | 1.197039  |
| H | 0.167060  | -4.855123 | 1.132029  |
| C | 2.615242  | 2.575994  | -1.478420 |
| C | 1.670614  | 3.074437  | -2.396436 |
| C | 1.414762  | 4.449174  | -2.409506 |
| H | 0.681522  | 4.843988  | -3.113457 |
| C | 2.066179  | 5.315232  | -1.543743 |
| H | 1.859246  | 6.383822  | -1.576700 |
| C | 2.962076  | 4.804358  | -0.613008 |
| H | 3.446821  | 5.481321  | 0.087903  |
| C | 3.240591  | 3.437401  | -0.547482 |
| C | 0.871464  | 2.182357  | -3.325278 |
| H | 1.298269  | 1.168196  | -3.285817 |
| C | -0.573763 | 2.096551  | -2.832978 |
| H | -1.043245 | 3.091607  | -2.825561 |
| H | -0.612291 | 1.700370  | -1.806510 |
| H | -1.184101 | 1.448998  | -3.475088 |
| C | 0.907256  | 2.665453  | -4.774665 |
| H | 0.373284  | 1.967161  | -5.430861 |
| H | 1.930743  | 2.771696  | -5.155599 |
| H | 0.418166  | 3.641775  | -4.883628 |
| C | 4.203080  | 2.907079  | 0.499401  |
| H | 3.878965  | 1.883224  | 0.754827  |
| C | 4.159869  | 3.707720  | 1.795445  |
| H | 4.574714  | 4.716877  | 1.676629  |
| H | 4.753579  | 3.209551  | 2.570284  |
| H | 3.131788  | 3.803672  | 2.168244  |
| C | 5.629670  | 2.802647  | -0.039020 |
| H | 6.000418  | 3.784243  | -0.364916 |
| H | 5.694927  | 2.116442  | -0.892949 |
| H | 6.311559  | 2.428558  | 0.736836  |
| H | 1.312759  | 0.040867  | 3.624855  |
| C | 0.306376  | -0.364481 | 3.685567  |
| C | -0.774078 | 0.491781  | 3.957661  |
| C | 0.100451  | -1.741521 | 3.528923  |
| C | -2.043639 | -0.074993 | 4.134071  |
| C | -1.172435 | -2.283859 | 3.703766  |
| H | 0.948168  | -2.383510 | 3.290415  |
| C | -2.239262 | -1.449565 | 4.032770  |
| H | -3.235125 | -1.871240 | 4.169204  |
| H | -2.886458 | 0.586115  | 4.345355  |
| H | -1.328649 | -3.355204 | 3.577378  |
| C | -0.553955 | 1.966019  | 4.109692  |
| H | 0.385579  | 2.275803  | 3.635232  |
| H | -1.367664 | 2.541863  | 3.651201  |
| H | -0.505272 | 2.260007  | 5.168212  |

Int-2a-toluene\_ortho2.log

SCF (wB97x) = -2882.03271461

H(0 K)= -2880.622448

H(298 K)= -2880.541682

G(298 K)= -2880.737020  
Lowest Frequency = 25.0085cm<sup>-1</sup>

|    |           |           |           |
|----|-----------|-----------|-----------|
| Pd | -0.015975 | 0.087762  | 1.130510  |
| Al | 2.024358  | 0.204389  | -0.096387 |
| N  | 3.426402  | -1.195100 | -0.228293 |
| N  | 2.624724  | 0.966769  | -1.835154 |
| C  | 4.077537  | -1.579640 | -1.331509 |
| C  | 4.105766  | -0.805483 | -2.498334 |
| H  | 4.739595  | -1.167366 | -3.303056 |
| C  | 3.545733  | 0.468351  | -2.667025 |
| C  | 4.878479  | -2.849591 | -1.319809 |
| H  | 5.635962  | -2.838226 | -0.525992 |
| H  | 5.377593  | -3.017057 | -2.278318 |
| H  | 4.229438  | -3.709844 | -1.110436 |
| C  | 4.078444  | 1.305737  | -3.796560 |
| H  | 3.301537  | 1.884512  | -4.305840 |
| H  | 4.606533  | 0.689224  | -4.530002 |
| H  | 4.797161  | 2.036445  | -3.398604 |
| C  | 3.749038  | -1.847996 | 1.011048  |
| C  | 4.718059  | -1.231439 | 1.836685  |
| C  | 5.076459  | -1.872226 | 3.024272  |
| H  | 5.826943  | -1.420282 | 3.670936  |
| C  | 4.469181  | -3.061167 | 3.414646  |
| H  | 4.758804  | -3.540579 | 4.348319  |
| C  | 3.477973  | -3.618624 | 2.620246  |
| H  | 2.978807  | -4.533634 | 2.940964  |
| C  | 3.098829  | -3.029843 | 1.409753  |
| C  | 5.332417  | 0.106356  | 1.457912  |
| H  | 4.527562  | 0.703288  | 0.991146  |
| C  | 5.834032  | 0.905238  | 2.655281  |
| H  | 5.062807  | 1.020404  | 3.425749  |
| H  | 6.139903  | 1.908336  | 2.332616  |
| H  | 6.713528  | 0.441038  | 3.120592  |
| C  | 6.459946  | -0.028940 | 0.432357  |
| H  | 7.265102  | -0.665235 | 0.825086  |
| H  | 6.894505  | 0.954746  | 0.208441  |
| H  | 6.120410  | -0.457732 | -0.516128 |
| C  | 1.982688  | -3.655746 | 0.600769  |
| H  | 1.930693  | -3.129983 | -0.360993 |
| C  | 0.635003  | -3.463492 | 1.296734  |
| H  | -0.173352 | -3.910765 | 0.703472  |
| H  | 0.399327  | -2.394002 | 1.426115  |
| H  | 0.631967  | -3.941476 | 2.288158  |
| C  | 2.222688  | -5.137201 | 0.314386  |
| H  | 3.192530  | -5.321654 | -0.166391 |
| H  | 1.435839  | -5.527075 | -0.344292 |
| H  | 2.198283  | -5.734652 | 1.235430  |
| C  | 2.137157  | 2.291578  | -2.096622 |
| C  | 0.950261  | 2.446831  | -2.845112 |
| C  | 0.524341  | 3.744698  | -3.133409 |
| H  | -0.383555 | 3.891845  | -3.716696 |
| C  | 1.226527  | 4.855338  | -2.676430 |
| H  | 0.874520  | 5.858055  | -2.915284 |
| C  | 2.357390  | 4.681424  | -1.891519 |
| H  | 2.883624  | 5.553168  | -1.502512 |
| C  | 2.832059  | 3.403185  | -1.583281 |
| C  | 0.171973  | 1.241492  | -3.341931 |
| H  | 0.263574  | 0.460995  | -2.567132 |

|    |           |           |           |
|----|-----------|-----------|-----------|
| C  | -1.315053 | 1.514870  | -3.536033 |
| H  | -1.505363 | 2.196803  | -4.376081 |
| H  | -1.780394 | 1.945109  | -2.640640 |
| H  | -1.843956 | 0.579551  | -3.761926 |
| C  | 0.744204  | 0.683097  | -4.646617 |
| H  | 0.768553  | 1.458505  | -5.425192 |
| H  | 0.114404  | -0.137426 | -5.016623 |
| H  | 1.759603  | 0.288939  | -4.531471 |
| C  | 4.026867  | 3.249878  | -0.661339 |
| H  | 4.369681  | 2.205111  | -0.715846 |
| C  | 3.605189  | 3.525301  | 0.785279  |
| H  | 3.232397  | 4.553653  | 0.891673  |
| H  | 4.451856  | 3.400707  | 1.473811  |
| H  | 2.802577  | 2.846464  | 1.109378  |
| C  | 5.204322  | 4.136150  | -1.058664 |
| H  | 5.506108  | 3.977776  | -2.101720 |
| H  | 6.072441  | 3.928200  | -0.420516 |
| H  | 4.969238  | 5.202051  | -0.943083 |
| Al | -2.087887 | -0.232120 | 0.028838  |
| N  | -3.502229 | 1.095253  | -0.403624 |
| N  | -2.811091 | -1.464540 | -1.368346 |
| C  | -4.297938 | 1.120092  | -1.476211 |
| C  | -4.339146 | 0.079792  | -2.412616 |
| H  | -5.007818 | 0.217133  | -3.257459 |
| C  | -3.706063 | -1.166444 | -2.318647 |
| C  | -5.224329 | 2.282836  | -1.689860 |
| H  | -4.680044 | 3.233431  | -1.624428 |
| H  | -5.995568 | 2.325100  | -0.910430 |
| H  | -5.720627 | 2.223901  | -2.662416 |
| C  | -4.087322 | -2.200738 | -3.339676 |
| H  | -3.240377 | -2.434614 | -3.996883 |
| H  | -4.916476 | -1.855329 | -3.962894 |
| H  | -4.373554 | -3.146346 | -2.863274 |
| C  | -3.768433 | 2.047758  | 0.640194  |
| C  | -4.777517 | 1.736636  | 1.576713  |
| C  | -5.069761 | 2.664296  | 2.578184  |
| H  | -5.847214 | 2.431102  | 3.306638  |
| C  | -4.382482 | 3.868024  | 2.666459  |
| H  | -4.629115 | 4.585270  | 3.447706  |
| C  | -3.359262 | 4.134802  | 1.768356  |
| H  | -2.792114 | 5.062100  | 1.857086  |
| C  | -3.018743 | 3.232972  | 0.755512  |
| C  | -5.505392 | 0.405344  | 1.578161  |
| H  | -5.196051 | -0.166363 | 0.691174  |
| C  | -5.095069 | -0.403201 | 2.809523  |
| H  | -5.347214 | 0.130277  | 3.736061  |
| H  | -4.011091 | -0.590835 | 2.819433  |
| H  | -5.611781 | -1.372252 | 2.831859  |
| C  | -7.022376 | 0.567160  | 1.515193  |
| H  | -7.516609 | -0.411876 | 1.478537  |
| H  | -7.337136 | 1.133180  | 0.629688  |
| H  | -7.409041 | 1.094697  | 2.397009  |
| C  | -1.854326 | 3.566489  | -0.152411 |
| H  | -1.708705 | 2.726256  | -0.845486 |
| C  | -2.136035 | 4.823558  | -0.973690 |
| H  | -3.013863 | 4.703289  | -1.623268 |
| H  | -1.277069 | 5.069555  | -1.608514 |
| H  | -2.326421 | 5.688271  | -0.323693 |
| C  | -0.556356 | 3.704601  | 0.642832  |

|   |           |           |           |
|---|-----------|-----------|-----------|
| H | 0.285267  | 3.906844  | -0.034348 |
| H | -0.326984 | 2.773681  | 1.185425  |
| H | -0.610107 | 4.527579  | 1.370997  |
| C | -2.356410 | -2.825446 | -1.278721 |
| C | -1.354526 | -3.317746 | -2.138254 |
| C | -0.986596 | -4.662305 | -2.029945 |
| H | -0.208618 | -5.051812 | -2.687511 |
| C | -1.586195 | -5.505076 | -1.105630 |
| H | -1.293770 | -6.552393 | -1.046438 |
| C | -2.540924 | -4.994934 | -0.234684 |
| H | -2.984574 | -5.649513 | 0.513089  |
| C | -2.929009 | -3.654383 | -0.287024 |
| C | -0.613817 | -2.444899 | -3.132843 |
| H | -1.114178 | -1.465152 | -3.178389 |
| C | 0.815272  | -2.212893 | -2.642800 |
| H | 1.358864  | -3.166176 | -2.560508 |
| H | 0.809175  | -1.742698 | -1.647667 |
| H | 1.381266  | -1.568659 | -3.327289 |
| C | -0.590767 | -3.041137 | -4.539986 |
| H | -0.107315 | -2.351996 | -5.243701 |
| H | -1.594967 | -3.263227 | -4.921751 |
| H | -0.019923 | -3.978120 | -4.567444 |
| C | -3.953314 | -3.118634 | 0.696197  |
| H | -3.700307 | -2.060859 | 0.888000  |
| C | -3.899929 | -3.823661 | 2.046186  |
| H | -4.251136 | -4.862021 | 1.988713  |
| H | -4.544448 | -3.309817 | 2.768462  |
| H | -2.879956 | -3.831198 | 2.451462  |
| C | -5.367222 | -3.145618 | 0.116404  |
| H | -5.659982 | -4.168245 | -0.158922 |
| H | -5.455494 | -2.516163 | -0.778378 |
| H | -6.095285 | -2.776750 | 0.851600  |
| H | -0.930263 | -0.785452 | 3.616603  |
| C | -0.078208 | -0.118091 | 3.730314  |
| C | 1.217053  | -0.639558 | 3.802220  |
| C | -0.296062 | 1.268101  | 3.859233  |
| C | 2.302305  | 0.203696  | 4.047896  |
| C | 0.810004  | 2.097787  | 4.062484  |
| C | 2.096772  | 1.572391  | 4.179009  |
| H | 2.940154  | 2.240312  | 4.355495  |
| H | 3.301673  | -0.220336 | 4.125410  |
| H | 0.650816  | 3.173836  | 4.148588  |
| H | 1.378748  | -1.711758 | 3.691538  |
| C | -1.685168 | 1.824765  | 3.818466  |
| H | -2.283324 | 1.486420  | 4.676965  |
| H | -1.682178 | 2.920341  | 3.826321  |
| H | -2.217254 | 1.499359  | 2.912442  |

Int-2a-toluene\_para.log

SCF (wB97x) = -2882.03432711

H(0 K)= -2880.623486

H(298 K)= -2880.542931

G(298 K)= -2880.736836

Lowest Frequency = 24.8488cm<sup>-1</sup>

Pd 0.027596 0.257996 -1.114834

Al -1.961442 0.001114 0.167056

N -3.086649 -1.635837 0.059327

**S-79**

|   |           |           |           |
|---|-----------|-----------|-----------|
| N | -2.644844 | 0.348932  | 2.010946  |
| C | -3.691052 | -2.277531 | 1.062858  |
| C | -3.827174 | -1.720917 | 2.341849  |
| H | -4.398432 | -2.300902 | 3.061067  |
| C | -3.450595 | -0.432174 | 2.740479  |
| C | -4.322373 | -3.618631 | 0.823599  |
| H | -5.018484 | -3.585720 | -0.023746 |
| H | -4.860023 | -3.970696 | 1.708329  |
| H | -3.559680 | -4.364015 | 0.564769  |
| C | -4.066781 | 0.089670  | 4.009921  |
| H | -3.380812 | 0.704159  | 4.601004  |
| H | -4.441606 | -0.729747 | 4.630384  |
| H | -4.922693 | 0.734076  | 3.762742  |
| C | -3.241020 | -2.147376 | -1.275139 |
| C | -4.202381 | -1.524131 | -2.104187 |
| C | -4.383615 | -2.023776 | -3.395371 |
| H | -5.122913 | -1.562998 | -4.048367 |
| C | -3.629218 | -3.091595 | -3.869363 |
| H | -3.789490 | -3.467636 | -4.878702 |
| C | -2.657580 | -3.658524 | -3.057516 |
| H | -2.041304 | -4.472959 | -3.439901 |
| C | -2.436938 | -3.197977 | -1.756049 |
| C | -5.015079 | -0.339777 | -1.607703 |
| H | -4.328949 | 0.292569  | -1.013070 |
| C | -5.553703 | 0.536577  | -2.731586 |
| H | -4.762576 | 0.834374  | -3.429191 |
| H | -5.998194 | 1.450466  | -2.318800 |
| H | -6.342097 | 0.030957  | -3.305056 |
| C | -6.163625 | -0.758691 | -0.687944 |
| H | -6.850823 | -1.438934 | -1.209832 |
| H | -6.742528 | 0.120969  | -0.374342 |
| H | -5.814779 | -1.260337 | 0.221344  |
| C | -1.308623 | -3.799306 | -0.943958 |
| H | -1.378596 | -3.403777 | 0.077876  |
| C | 0.042374  | -3.361499 | -1.510836 |
| H | 0.867123  | -3.768337 | -0.909253 |
| H | 0.138605  | -2.264286 | -1.512248 |
| H | 0.167481  | -3.718789 | -2.544449 |
| C | -1.373987 | -5.323829 | -0.866435 |
| H | -2.340482 | -5.689601 | -0.495751 |
| H | -0.588431 | -5.701986 | -0.199152 |
| H | -1.209875 | -5.783193 | -1.850254 |
| C | -2.394011 | 1.675520  | 2.498252  |
| C | -1.218425 | 1.927173  | 3.236150  |
| C | -1.032892 | 3.210715  | 3.755358  |
| H | -0.146185 | 3.420431  | 4.352046  |
| C | -1.952067 | 4.227348  | 3.521874  |
| H | -1.782116 | 5.221351  | 3.932576  |
| C | -3.075947 | 3.973790  | 2.747493  |
| H | -3.781164 | 4.778803  | 2.540515  |
| C | -3.320630 | 2.701008  | 2.225091  |
| C | -0.216235 | 0.823937  | 3.521869  |
| H | -0.268960 | 0.109496  | 2.684150  |
| C | 1.226333  | 1.309833  | 3.604746  |
| H | 1.393283  | 1.998011  | 4.444517  |
| H | 1.545551  | 1.816028  | 2.686032  |
| H | 1.901448  | 0.457701  | 3.759470  |
| C | -0.576878 | 0.073747  | 4.805302  |
| H | -0.648382 | 0.765780  | 5.656068  |



|    |           |           |           |
|----|-----------|-----------|-----------|
| H  | 0.195646  | -0.668352 | 5.045579  |
| H  | -1.531857 | -0.458507 | 4.724445  |
| C  | -4.533647 | 2.474500  | 1.342987  |
| H  | -4.670085 | 1.389592  | 1.215006  |
| C  | -4.287118 | 3.071514  | -0.044197 |
| H  | -4.116093 | 4.155274  | 0.020371  |
| H  | -5.150591 | 2.904390  | -0.702816 |
| H  | -3.402051 | 2.623274  | -0.519503 |
| C  | -5.819306 | 3.031334  | 1.949309  |
| H  | -5.996799 | 2.648540  | 2.962270  |
| H  | -6.684075 | 2.762320  | 1.330391  |
| H  | -5.797867 | 4.126868  | 2.012684  |
| Al | 2.087113  | -0.056285 | 0.008736  |
| N  | 3.252837  | 1.524574  | 0.371992  |
| N  | 3.110619  | -1.148796 | 1.297408  |
| C  | 4.182346  | 1.641305  | 1.318415  |
| C  | 4.441636  | 0.620976  | 2.250888  |
| H  | 5.157735  | 0.857019  | 3.033171  |
| C  | 3.986417  | -0.701596 | 2.209728  |
| C  | 5.051480  | 2.864861  | 1.383016  |
| H  | 5.888620  | 2.768243  | 0.677789  |
| H  | 5.479854  | 2.991979  | 2.381914  |
| H  | 4.509900  | 3.773814  | 1.102067  |
| C  | 4.534532  | -1.655094 | 3.232697  |
| H  | 3.732118  | -2.016379 | 3.890052  |
| H  | 5.298437  | -1.180428 | 3.854475  |
| H  | 4.966932  | -2.545919 | 2.760573  |
| C  | 3.161729  | 2.513867  | -0.667088 |
| C  | 4.090121  | 2.489801  | -1.727372 |
| C  | 3.950112  | 3.421002  | -2.760690 |
| H  | 4.660692  | 3.405098  | -3.587609 |
| C  | 2.913681  | 4.343348  | -2.762159 |
| H  | 2.818375  | 5.060684  | -3.575740 |
| C  | 1.986469  | 4.331591  | -1.727395 |
| H  | 1.161886  | 5.042561  | -1.739116 |
| C  | 2.078398  | 3.419593  | -0.673481 |
| C  | 5.171272  | 1.433023  | -1.844429 |
| H  | 5.204532  | 0.852903  | -0.910057 |
| C  | 4.815880  | 0.465371  | -2.974152 |
| H  | 4.753466  | 0.993537  | -3.935115 |
| H  | 3.842876  | -0.016254 | -2.797689 |
| H  | 5.577518  | -0.319330 | -3.073153 |
| C  | 6.558831  | 2.028818  | -2.072842 |
| H  | 7.323025  | 1.241399  | -2.070710 |
| H  | 6.827138  | 2.761811  | -1.301915 |
| H  | 6.622485  | 2.539515  | -3.042401 |
| C  | 1.068327  | 3.458757  | 0.453850  |
| H  | 0.945423  | 2.427271  | 0.820959  |
| C  | 1.592760  | 4.325235  | 1.599499  |
| H  | 2.512238  | 3.914886  | 2.037594  |
| H  | 0.847281  | 4.400945  | 2.400294  |
| H  | 1.815269  | 5.342382  | 1.247267  |
| C  | -0.318699 | 3.913224  | 0.015407  |
| H  | -1.033515 | 3.760190  | 0.834173  |
| H  | -0.670276 | 3.326550  | -0.845040 |
| H  | -0.348136 | 4.980899  | -0.246003 |
| C  | 2.919054  | -2.566817 | 1.151919  |
| C  | 2.003526  | -3.274618 | 1.953953  |
| C  | 1.862086  | -4.651040 | 1.750006  |

|   |           |           |           |
|---|-----------|-----------|-----------|
| H | 1.148899  | -5.205026 | 2.361092  |
| C | 2.601682  | -5.320093 | 0.787135  |
| H | 2.484059  | -6.394069 | 0.651262  |
| C | 3.472943  | -4.603492 | -0.023850 |
| H | 4.025974  | -5.125447 | -0.802106 |
| C | 3.633903  | -3.224223 | 0.122767  |
| C | 1.121161  | -2.608669 | 2.990037  |
| H | 1.447883  | -1.563359 | 3.102631  |
| C | -0.328962 | -2.591242 | 2.504134  |
| H | -0.698785 | -3.613251 | 2.331626  |
| H | -0.416216 | -2.039948 | 1.555050  |
| H | -0.995352 | -2.119145 | 3.237572  |
| C | 1.217368  | -3.294344 | 4.352763  |
| H | 0.612206  | -2.766502 | 5.099938  |
| H | 2.249177  | -3.340636 | 4.723434  |
| H | 0.842458  | -4.324783 | 4.309327  |
| C | 4.550723  | -2.460791 | -0.816096 |
| H | 4.114059  | -1.455802 | -0.950949 |
| C | 4.628032  | -3.091967 | -2.201267 |
| H | 5.151357  | -4.056625 | -2.189779 |
| H | 5.181231  | -2.440524 | -2.886759 |
| H | 3.627388  | -3.252848 | -2.623056 |
| C | 5.947554  | -2.264775 | -0.227017 |
| H | 6.425279  | -3.231683 | -0.017189 |
| H | 5.922143  | -1.690180 | 0.707064  |
| H | 6.591144  | -1.719229 | -0.930739 |
| H | 1.059330  | -0.719783 | -3.563062 |
| C | 0.262137  | 0.012701  | -3.652215 |
| C | -1.016918 | -0.373902 | -4.065274 |
| C | 0.521643  | 1.370216  | -3.400808 |
| C | -2.010250 | 0.583711  | -4.261133 |
| H | -1.234932 | -1.425920 | -4.247977 |
| C | -0.498758 | 2.311067  | -3.556732 |
| H | 1.523347  | 1.694602  | -3.114641 |
| C | -1.773634 | 1.935695  | -3.998231 |
| H | -2.996219 | 0.265700  | -4.603166 |
| H | -0.289517 | 3.360855  | -3.343958 |
| C | -2.868872 | 2.950869  | -4.117654 |
| H | -3.371614 | 3.105740  | -3.150756 |
| H | -2.489281 | 3.928887  | -4.437249 |
| H | -3.640045 | 2.638467  | -4.832304 |

Int-2b\_cc-PPdAl.log

SCF (wB97x) = -2648.55898393  
H(0 K)= -2647.330990  
H(298 K)= -2647.266737  
G(298 K)= -2647.431584  
Lowest Frequency = 18.1251cm<sup>-1</sup>

|    |           |           |           |
|----|-----------|-----------|-----------|
| Pd | -0.444247 | 0.539644  | -0.339440 |
| P  | -2.677875 | -0.062426 | -0.007880 |
| C  | -3.116824 | -1.554318 | -1.036846 |
| H  | -4.189147 | -1.781968 | -0.900763 |
| C  | -2.326577 | -2.807469 | -0.649985 |
| H  | -1.243914 | -2.590733 | -0.717068 |
| H  | -2.519862 | -3.084043 | 0.396772  |
| C  | -2.685785 | -3.977935 | -1.559070 |
| H  | -2.124855 | -4.872312 | -1.257838 |

|    |           |           |           |
|----|-----------|-----------|-----------|
| H  | -3.753855 | -4.222680 | -1.430830 |
| C  | -2.421542 | -3.642404 | -3.020359 |
| H  | -2.681297 | -4.490238 | -3.669657 |
| H  | -1.340915 | -3.463394 | -3.151339 |
| C  | -3.191022 | -2.393627 | -3.433485 |
| H  | -4.272868 | -2.604984 | -3.392203 |
| H  | -2.969169 | -2.127286 | -4.476402 |
| C  | -2.872580 | -1.220149 | -2.514079 |
| H  | -3.454168 | -0.333677 | -2.811610 |
| H  | -1.810097 | -0.935295 | -2.624192 |
| C  | -4.039964 | 1.135471  | -0.492270 |
| H  | -3.644233 | 1.546677  | -1.437708 |
| C  | -5.442774 | 0.600471  | -0.801128 |
| H  | -5.892735 | 0.155255  | 0.098338  |
| H  | -5.395281 | -0.202070 | -1.550207 |
| C  | -6.350295 | 1.716869  | -1.313323 |
| H  | -5.954029 | 2.087063  | -2.274201 |
| H  | -7.353948 | 1.322785  | -1.524864 |
| C  | -6.422081 | 2.875374  | -0.326742 |
| H  | -6.884441 | 2.523593  | 0.610650  |
| H  | -7.072837 | 3.672206  | -0.712002 |
| C  | -5.029125 | 3.415316  | -0.028660 |
| H  | -5.077044 | 4.240624  | 0.695497  |
| H  | -4.601857 | 3.836210  | -0.953096 |
| C  | -4.105868 | 2.315050  | 0.483479  |
| H  | -3.092274 | 2.709666  | 0.660183  |
| H  | -4.480224 | 1.964733  | 1.460087  |
| C  | -3.039551 | -0.647910 | 1.727677  |
| H  | -2.466987 | -1.590371 | 1.765682  |
| C  | -2.401147 | 0.260571  | 2.783029  |
| H  | -1.345418 | 0.421675  | 2.514892  |
| H  | -2.876098 | 1.254881  | 2.767281  |
| C  | -2.525312 | -0.335558 | 4.181114  |
| H  | -2.098525 | 0.351146  | 4.926217  |
| H  | -1.924305 | -1.258408 | 4.230517  |
| C  | -3.971215 | -0.673104 | 4.526245  |
| H  | -4.035926 | -1.123499 | 5.526160  |
| H  | -4.562865 | 0.256580  | 4.566142  |
| C  | -4.576320 | -1.601146 | 3.479497  |
| H  | -5.620047 | -1.838910 | 3.727362  |
| H  | -4.028798 | -2.559110 | 3.484298  |
| C  | -4.487208 | -0.984618 | 2.086021  |
| H  | -5.094662 | -0.065149 | 2.067786  |
| H  | -4.925791 | -1.661008 | 1.336903  |
| Al | 1.731068  | -0.153275 | 0.303728  |
| N  | 2.672014  | -1.877498 | 0.482656  |
| N  | 3.350265  | 0.811332  | 0.894740  |
| C  | 3.888423  | -2.100980 | 0.994439  |
| C  | 4.700082  | -1.077391 | 1.501275  |
| H  | 5.647197  | -1.383003 | 1.936340  |
| C  | 4.468142  | 0.301518  | 1.420072  |
| C  | 4.437342  | -3.498847 | 1.027700  |
| H  | 3.841384  | -4.147440 | 1.682527  |
| H  | 5.471363  | -3.511283 | 1.382158  |
| H  | 4.399073  | -3.958118 | 0.032430  |
| C  | 5.553344  | 1.222110  | 1.898825  |
| H  | 6.053111  | 1.710649  | 1.051668  |
| H  | 6.311143  | 0.680814  | 2.471919  |
| H  | 5.144861  | 2.030191  | 2.516952  |

|   |           |           |           |
|---|-----------|-----------|-----------|
| C | 1.943231  | -2.991622 | -0.057124 |
| C | 1.261042  | -3.870635 | 0.810334  |
| C | 0.570629  | -4.947968 | 0.253811  |
| H | 0.036440  | -5.635248 | 0.909540  |
| C | 0.544427  | -5.154023 | -1.121130 |
| H | 0.011249  | -6.007600 | -1.537329 |
| C | 1.179965  | -4.252884 | -1.962493 |
| H | 1.135946  | -4.398963 | -3.042451 |
| C | 1.879554  | -3.154029 | -1.454290 |
| C | 1.202684  | -3.617740 | 2.303820  |
| H | 2.043714  | -2.964887 | 2.575656  |
| C | -0.081581 | -2.860287 | 2.647670  |
| H | -0.177327 | -1.936401 | 2.055547  |
| H | -0.106518 | -2.594086 | 3.712757  |
| H | -0.965085 | -3.480074 | 2.434236  |
| C | 1.321768  | -4.889200 | 3.138315  |
| H | 0.450179  | -5.543940 | 3.012791  |
| H | 1.383868  | -4.642496 | 4.204868  |
| H | 2.212325  | -5.473999 | 2.874298  |
| C | 2.525323  | -2.186234 | -2.426319 |
| H | 3.022606  | -1.393931 | -1.845655 |
| C | 1.464413  | -1.517243 | -3.300596 |
| H | 1.919049  | -0.772801 | -3.968387 |
| H | 0.713476  | -1.008567 | -2.674979 |
| H | 0.941445  | -2.252110 | -3.928735 |
| C | 3.598592  | -2.864128 | -3.275593 |
| H | 4.384533  | -3.313051 | -2.655329 |
| H | 4.073611  | -2.141774 | -3.951347 |
| H | 3.172331  | -3.662955 | -3.896716 |
| C | 3.286168  | 2.223707  | 0.648658  |
| C | 3.942506  | 2.742859  | -0.489846 |
| C | 3.841074  | 4.109847  | -0.750758 |
| H | 4.336432  | 4.524138  | -1.627839 |
| C | 3.102687  | 4.947579  | 0.077769  |
| H | 3.035399  | 6.011967  | -0.140807 |
| C | 2.437823  | 4.415381  | 1.172610  |
| H | 1.845478  | 5.068996  | 1.813828  |
| C | 2.503640  | 3.051129  | 1.475656  |
| C | 4.638639  | 1.831108  | -1.483364 |
| H | 4.939039  | 0.909124  | -0.965013 |
| C | 3.643923  | 1.431647  | -2.576634 |
| H | 3.321283  | 2.312240  | -3.149223 |
| H | 2.736708  | 0.975259  | -2.147468 |
| H | 4.089312  | 0.712437  | -3.277607 |
| C | 5.896874  | 2.439779  | -2.093498 |
| H | 5.666506  | 3.294141  | -2.742213 |
| H | 6.416139  | 1.700275  | -2.714451 |
| H | 6.598334  | 2.788351  | -1.325214 |
| C | 1.742833  | 2.532269  | 2.679150  |
| H | 1.832494  | 1.435767  | 2.695572  |
| C | 0.255303  | 2.864919  | 2.579127  |
| H | 0.083717  | 3.950078  | 2.558497  |
| H | -0.288389 | 2.462354  | 3.443810  |
| H | -0.184352 | 2.427399  | 1.667423  |
| C | 2.341219  | 3.066381  | 3.980222  |
| H | 3.398910  | 2.793694  | 4.086761  |
| H | 1.802558  | 2.669526  | 4.849569  |
| H | 2.278509  | 4.162071  | 4.023667  |
| H | 0.428876  | 1.337310  | -2.930960 |

|   |           |          |           |
|---|-----------|----------|-----------|
| C | -0.213548 | 2.134392 | -2.562977 |
| C | -1.472981 | 2.345140 | -3.128715 |
| C | 0.245736  | 2.979757 | -1.544723 |
| C | -2.275399 | 3.392220 | -2.676467 |
| H | -1.825325 | 1.688733 | -3.923887 |
| C | -0.572752 | 4.009444 | -1.077567 |
| H | 1.243285  | 2.840851 | -1.129673 |
| C | -1.829884 | 4.216600 | -1.643603 |
| H | -3.257608 | 3.555609 | -3.120906 |
| H | -0.217215 | 4.653726 | -0.273942 |
| H | -2.464238 | 5.024829 | -1.280501 |

Int-2b-toluene\_meta1.log

SCF (wB97x) = -2687.86525337

H(0 K)= -2686.609316

H(298 K)= -2686.543353

G(298 K)= -2686.713146

Lowest Frequency = 11.3904cm<sup>-1</sup>

|    |           |           |           |
|----|-----------|-----------|-----------|
| Pd | 0.599347  | 0.025193  | -0.769384 |
| P  | 2.230730  | -0.260359 | 0.857560  |
| C  | 2.285791  | 1.279120  | 1.909368  |
| H  | 3.061330  | 1.168451  | 2.688443  |
| C  | 0.950188  | 1.566617  | 2.602750  |
| H  | 0.155207  | 1.592940  | 1.834460  |
| H  | 0.688070  | 0.749235  | 3.291693  |
| C  | 0.981897  | 2.891400  | 3.359936  |
| H  | -0.000424 | 3.084854  | 3.816330  |
| H  | 1.702434  | 2.821323  | 4.192106  |
| C  | 1.374797  | 4.048172  | 2.449734  |
| H  | 1.403789  | 4.991248  | 3.013673  |
| H  | 0.600481  | 4.169506  | 1.674448  |
| C  | 2.710756  | 3.775827  | 1.771578  |
| H  | 3.510491  | 3.728951  | 2.530109  |
| H  | 2.976540  | 4.599098  | 1.092916  |
| C  | 2.656728  | 2.461162  | 1.005706  |
| H  | 3.607347  | 2.272986  | 0.485265  |
| H  | 1.886663  | 2.527008  | 0.215351  |
| C  | 4.033545  | -0.454366 | 0.366965  |
| H  | 4.104820  | 0.228039  | -0.499771 |
| C  | 5.119176  | -0.024985 | 1.360716  |
| H  | 5.083541  | -0.655205 | 2.262149  |
| H  | 4.949106  | 1.005909  | 1.700812  |
| C  | 6.505780  | -0.128910 | 0.730207  |
| H  | 6.565822  | 0.576609  | -0.116373 |
| H  | 7.274764  | 0.183574  | 1.450284  |
| C  | 6.780984  | -1.538255 | 0.222180  |
| H  | 6.785642  | -2.235256 | 1.076944  |
| H  | 7.779920  | -1.598788 | -0.230966 |
| C  | 5.712490  | -1.967657 | -0.775021 |
| H  | 5.896389  | -2.993134 | -1.124596 |
| H  | 5.768408  | -1.318149 | -1.662146 |
| C  | 4.315339  | -1.861297 | -0.173040 |
| H  | 3.550260  | -2.136011 | -0.916259 |
| H  | 4.229811  | -2.593295 | 0.646833  |
| C  | 1.816889  | -1.608761 | 2.079582  |
| H  | 0.912755  | -1.201080 | 2.568025  |
| C  | 1.365740  | -2.898144 | 1.379013  |

|    |           |           |           |
|----|-----------|-----------|-----------|
| H  | 0.585542  | -2.654922 | 0.639506  |
| H  | 2.202902  | -3.330620 | 0.809392  |
| C  | 0.863997  | -3.929084 | 2.384391  |
| H  | 0.582180  | -4.855416 | 1.864676  |
| H  | -0.057184 | -3.549900 | 2.856281  |
| C  | 1.895839  | -4.209270 | 3.470853  |
| H  | 1.508554  | -4.940134 | 4.193983  |
| H  | 2.789095  | -4.668186 | 3.015085  |
| C  | 2.305381  | -2.922499 | 4.177455  |
| H  | 3.055972  | -3.126307 | 4.953630  |
| H  | 1.429166  | -2.498726 | 4.695736  |
| C  | 2.839513  | -1.898642 | 3.179900  |
| H  | 3.761589  | -2.297726 | 2.727675  |
| H  | 3.126384  | -0.970011 | 3.696076  |
| Al | -1.752005 | 0.129150  | -0.884483 |
| N  | -3.179562 | 1.413260  | -0.447738 |
| N  | -3.097065 | -1.290437 | -1.136736 |
| C  | -4.436861 | 1.337046  | -0.901384 |
| C  | -4.970715 | 0.169621  | -1.466035 |
| H  | -5.996242 | 0.226738  | -1.818923 |
| C  | -4.372705 | -1.100343 | -1.475331 |
| C  | -5.336055 | 2.534347  | -0.790370 |
| H  | -5.424370 | 2.869338  | 0.250705  |
| H  | -6.336343 | 2.320385  | -1.176001 |
| H  | -4.920783 | 3.384582  | -1.347136 |
| C  | -5.223628 | -2.277589 | -1.849869 |
| H  | -6.171564 | -1.960904 | -2.293455 |
| H  | -5.450629 | -2.888417 | -0.966186 |
| H  | -4.700433 | -2.939379 | -2.550400 |
| C  | -2.788230 | 2.580075  | 0.291580  |
| C  | -2.830827 | 2.523932  | 1.702409  |
| C  | -2.504804 | 3.679050  | 2.416786  |
| H  | -2.543245 | 3.664442  | 3.504429  |
| C  | -2.113082 | 4.843874  | 1.766857  |
| H  | -1.859630 | 5.731526  | 2.344721  |
| C  | -2.001587 | 4.854646  | 0.384109  |
| H  | -1.643059 | 5.751421  | -0.121560 |
| C  | -2.326159 | 3.728571  | -0.377694 |
| C  | -3.190316 | 1.237637  | 2.425972  |
| H  | -2.735516 | 0.412882  | 1.849546  |
| C  | -2.616051 | 1.173476  | 3.836704  |
| H  | -1.542458 | 1.395835  | 3.851238  |
| H  | -2.757562 | 0.172198  | 4.259472  |
| H  | -3.116344 | 1.878220  | 4.513977  |
| C  | -4.697979 | 0.979927  | 2.470908  |
| H  | -5.221306 | 1.811615  | 2.962643  |
| H  | -4.913299 | 0.068182  | 3.044952  |
| H  | -5.132365 | 0.845954  | 1.473879  |
| C  | -2.092623 | 3.751240  | -1.874516 |
| H  | -2.558249 | 2.854621  | -2.309207 |
| C  | -0.589473 | 3.667977  | -2.152240 |
| H  | -0.385740 | 3.632130  | -3.230951 |
| H  | -0.158622 | 2.764495  | -1.693353 |
| H  | -0.067220 | 4.542526  | -1.736723 |
| C  | -2.704966 | 4.972627  | -2.555367 |
| H  | -3.779282 | 5.065640  | -2.350543 |
| H  | -2.573729 | 4.913805  | -3.642453 |
| H  | -2.227642 | 5.903362  | -2.222750 |
| C  | -2.598510 | -2.622248 | -0.952691 |

|   |           |           |           |
|---|-----------|-----------|-----------|
| C | -1.802159 | -3.222365 | -1.947627 |
| C | -1.274241 | -4.492073 | -1.696640 |
| H | -0.662223 | -4.968918 | -2.462834 |
| C | -1.508652 | -5.149682 | -0.496898 |
| H | -1.084287 | -6.136829 | -0.320115 |
| C | -2.278328 | -4.534209 | 0.482397  |
| H | -2.442727 | -5.038385 | 1.435822  |
| C | -2.830984 | -3.268427 | 0.279256  |
| C | -1.504834 | -2.550568 | -3.272519 |
| H | -1.963304 | -1.551315 | -3.259447 |
| C | -0.002624 | -2.357388 | -3.470548 |
| H | 0.521214  | -3.320358 | -3.549264 |
| H | 0.434388  | -1.797420 | -2.626092 |
| H | 0.193041  | -1.794148 | -4.393121 |
| C | -2.112014 | -3.328850 | -4.439389 |
| H | -1.681446 | -4.336668 | -4.510874 |
| H | -1.917795 | -2.819215 | -5.391263 |
| H | -3.198385 | -3.443980 | -4.335318 |
| C | -3.603677 | -2.610343 | 1.406313  |
| H | -4.005882 | -1.653468 | 1.043306  |
| C | -2.670519 | -2.301582 | 2.576694  |
| H | -2.267798 | -3.227364 | 3.009245  |
| H | -3.206869 | -1.770493 | 3.374238  |
| H | -1.815980 | -1.683379 | 2.264265  |
| C | -4.779495 | -3.462056 | 1.880972  |
| H | -5.469199 | -3.707505 | 1.064021  |
| H | -5.351842 | -2.937155 | 2.656289  |
| H | -4.437310 | -4.411162 | 2.313986  |
| H | 1.079522  | 0.712778  | -3.080337 |
| C | 2.169133  | 0.808742  | -3.069906 |
| C | 2.757149  | 1.960967  | -2.544231 |
| C | 2.973594  | -0.203777 | -3.590471 |
| C | 4.144683  | 2.123085  | -2.525056 |
| H | 2.122303  | 2.745635  | -2.131811 |
| C | 4.358418  | -0.047314 | -3.594977 |
| H | 2.521770  | -1.109331 | -3.992049 |
| C | 4.937444  | 1.102967  | -3.066919 |
| H | 4.992707  | -0.830453 | -4.009013 |
| H | 6.023502  | 1.211578  | -3.065382 |
| C | 4.773086  | 3.345380  | -1.925000 |
| H | 5.440416  | 3.852986  | -2.633272 |
| H | 4.015832  | 4.068631  | -1.601418 |
| H | 5.382720  | 3.094883  | -1.044664 |

Int-2b-toluene\_meta2.log

SCF (wB97x) = -2687.86441221

H(0 K)= -2686.608612

H(298 K)= -2686.542588

G(298 K)= -2686.712360

Lowest Frequency = 13.6195cm<sup>-1</sup>

|    |           |          |           |
|----|-----------|----------|-----------|
| Pd | 0.626495  | 0.088751 | -0.741299 |
| P  | 2.187183  | 0.153894 | 0.979287  |
| C  | 1.988470  | 1.773365 | 1.883945  |
| H  | 2.705888  | 1.819140 | 2.722749  |
| C  | 0.578643  | 1.961283 | 2.454655  |
| H  | -0.152373 | 1.830862 | 1.635335  |
| H  | 0.354626  | 1.178910 | 3.196103  |

**S-87**

|    |           |           |           |
|----|-----------|-----------|-----------|
| C  | 0.406694  | 3.340105  | 3.085954  |
| H  | -0.621913 | 3.456415  | 3.458376  |
| H  | 1.067561  | 3.427091  | 3.964829  |
| C  | 0.734424  | 4.451049  | 2.096874  |
| H  | 0.612194  | 5.436905  | 2.567620  |
| H  | 0.013352  | 4.409762  | 1.264212  |
| C  | 2.140678  | 4.283327  | 1.538853  |
| H  | 2.879069  | 4.401793  | 2.349942  |
| H  | 2.361740  | 5.068743  | 0.802214  |
| C  | 2.301302  | 2.909733  | 0.901562  |
| H  | 3.309564  | 2.796723  | 0.475652  |
| H  | 1.601787  | 2.813063  | 0.051381  |
| C  | 4.032775  | 0.148616  | 0.627260  |
| H  | 4.088086  | 0.771547  | -0.284080 |
| C  | 4.977231  | 0.778602  | 1.658490  |
| H  | 4.947449  | 0.210190  | 2.600164  |
| H  | 4.657176  | 1.799326  | 1.906742  |
| C  | 6.412383  | 0.810724  | 1.139198  |
| H  | 6.455179  | 1.461918  | 0.249391  |
| H  | 7.076164  | 1.264222  | 1.888311  |
| C  | 6.896347  | -0.582845 | 0.760652  |
| H  | 6.917518  | -1.216143 | 1.663320  |
| H  | 7.927728  | -0.546756 | 0.384051  |
| C  | 5.969233  | -1.206293 | -0.274217 |
| H  | 6.306169  | -2.217722 | -0.542496 |
| H  | 6.011963  | -0.605802 | -1.196056 |
| C  | 4.527010  | -1.244271 | 0.221070  |
| H  | 3.861465  | -1.667615 | -0.548542 |
| H  | 4.470971  | -1.922575 | 1.088460  |
| C  | 1.846195  | -1.131663 | 2.288595  |
| H  | 0.861992  | -0.807183 | 2.673390  |
| C  | 1.619375  | -2.521097 | 1.675675  |
| H  | 0.876124  | -2.442852 | 0.865501  |
| H  | 2.548212  | -2.880139 | 1.206018  |
| C  | 1.173690  | -3.530309 | 2.728727  |
| H  | 1.062096  | -4.523991 | 2.273005  |
| H  | 0.172516  | -3.248039 | 3.092973  |
| C  | 2.134843  | -3.581586 | 3.910409  |
| H  | 1.781515  | -4.296650 | 4.666033  |
| H  | 3.114917  | -3.953103 | 3.567311  |
| C  | 2.316749  | -2.198865 | 4.524516  |
| H  | 3.016267  | -2.237557 | 5.371015  |
| H  | 1.352464  | -1.853268 | 4.933025  |
| C  | 2.803676  | -1.199159 | 3.479531  |
| H  | 3.800584  | -1.514073 | 3.130940  |
| H  | 2.933825  | -0.203159 | 3.929080  |
| Al | -1.718371 | -0.078582 | -0.930896 |
| N  | -3.280607 | 1.095191  | -0.684360 |
| N  | -2.911359 | -1.646286 | -1.057663 |
| C  | -4.500467 | 0.847127  | -1.178256 |
| C  | -4.898317 | -0.424526 | -1.615148 |
| H  | -5.906912 | -0.508588 | -2.009036 |
| C  | -4.185359 | -1.622431 | -1.450918 |
| C  | -5.505208 | 1.960366  | -1.259787 |
| H  | -5.689637 | 2.405780  | -0.274372 |
| H  | -6.456526 | 1.610733  | -1.669568 |
| H  | -5.128933 | 2.774429  | -1.893048 |
| C  | -4.908052 | -2.913118 | -1.700075 |
| H  | -5.870000 | -2.744817 | -2.191889 |



|   |           |           |           |
|---|-----------|-----------|-----------|
| H | -5.097701 | -3.438344 | -0.754464 |
| H | -4.305110 | -3.595693 | -2.310870 |
| C | -3.047761 | 2.368953  | -0.064190 |
| C | -3.225993 | 2.474693  | 1.333341  |
| C | -3.078972 | 3.732688  | 1.922125  |
| H | -3.225571 | 3.842343  | 2.995150  |
| C | -2.729963 | 4.846849  | 1.167378  |
| H | -2.618873 | 5.817929  | 1.647641  |
| C | -2.473873 | 4.704343  | -0.188446 |
| H | -2.143263 | 5.565926  | -0.769108 |
| C | -2.615400 | 3.469165  | -0.827453 |
| C | -3.537662 | 1.252068  | 2.179562  |
| H | -2.990594 | 0.407141  | 1.727201  |
| C | -3.048974 | 1.392884  | 3.617113  |
| H | -1.993874 | 1.687949  | 3.662868  |
| H | -3.155103 | 0.441246  | 4.150449  |
| H | -3.632249 | 2.135454  | 4.177226  |
| C | -5.022321 | 0.881911  | 2.174085  |
| H | -5.635390 | 1.720155  | 2.533070  |
| H | -5.205682 | 0.028331  | 2.840970  |
| H | -5.381782 | 0.598912  | 1.178525  |
| C | -2.227121 | 3.342755  | -2.286370 |
| H | -2.530673 | 2.346057  | -2.639308 |
| C | -0.704228 | 3.429878  | -2.414151 |
| H | -0.387384 | 3.307000  | -3.458672 |
| H | -0.217941 | 2.642766  | -1.815326 |
| H | -0.336379 | 4.404384  | -2.059870 |
| C | -2.908421 | 4.381112  | -3.174355 |
| H | -4.001916 | 4.346509  | -3.086731 |
| H | -2.650419 | 4.216804  | -4.227418 |
| H | -2.592601 | 5.400981  | -2.919382 |
| C | -2.294987 | -2.895763 | -0.717875 |
| C | -1.417683 | -3.518650 | -1.626443 |
| C | -0.777202 | -4.695430 | -1.228131 |
| H | -0.100039 | -5.188781 | -1.926063 |
| C | -0.981657 | -5.239711 | 0.032224  |
| H | -0.469068 | -6.154865 | 0.324713  |
| C | -1.836529 | -4.602552 | 0.923207  |
| H | -1.979606 | -5.016004 | 1.922491  |
| C | -2.503424 | -3.427772 | 0.571498  |
| C | -1.145658 | -2.966346 | -3.010415 |
| H | -1.711398 | -2.030511 | -3.123055 |
| C | 0.333125  | -2.626254 | -3.184367 |
| H | 0.962104  | -3.526237 | -3.134162 |
| H | 0.666285  | -1.929733 | -2.396075 |
| H | 0.506276  | -2.149591 | -4.158782 |
| C | -1.615853 | -3.930223 | -4.099192 |
| H | -1.073232 | -4.883618 | -4.047655 |
| H | -1.442377 | -3.506423 | -5.096060 |
| H | -2.685852 | -4.157755 | -4.012255 |
| C | -3.371754 | -2.731758 | 1.601711  |
| H | -3.886800 | -1.890756 | 1.115664  |
| C | -2.502354 | -2.152261 | 2.717309  |
| H | -1.992242 | -2.953102 | 3.269516  |
| H | -3.112107 | -1.590256 | 3.436842  |
| H | -1.727770 | -1.478555 | 2.320561  |
| C | -4.439227 | -3.655009 | 2.185307  |
| H | -5.074625 | -4.094573 | 1.406411  |
| H | -5.089153 | -3.106993 | 2.878997  |

|   |           |           |           |
|---|-----------|-----------|-----------|
| H | -3.990636 | -4.485114 | 2.746422  |
| H | 1.133411  | 0.805101  | -2.997441 |
| C | 2.220524  | 0.931938  | -2.985249 |
| C | 2.781076  | 2.157959  | -2.618597 |
| C | 3.048589  | -0.125782 | -3.354747 |
| C | 4.164175  | 2.311908  | -2.625699 |
| H | 2.136040  | 2.983740  | -2.321713 |
| C | 4.440292  | 0.017784  | -3.378276 |
| H | 2.606840  | -1.083873 | -3.630504 |
| C | 4.985328  | 1.250272  | -3.005929 |
| H | 6.069374  | 1.375971  | -3.010807 |
| H | 4.608637  | 3.262511  | -2.331565 |
| C | 5.313505  | -1.125501 | -3.801787 |
| H | 5.155017  | -1.383320 | -4.857304 |
| H | 6.377183  | -0.893464 | -3.675759 |
| H | 5.100981  | -2.032590 | -3.220660 |

Int-2b-toluene\_ortho1.log

SCF (wB97x) = -2687.86852279

H(0 K)= -2686.612420

H(298 K)= -2686.546602

G(298 K)= -2686.715121

Lowest Frequency = 8.1896cm<sup>-1</sup>

|    |          |           |           |
|----|----------|-----------|-----------|
| Pd | 0.462784 | -0.509879 | -0.251274 |
| P  | 2.667568 | 0.141222  | 0.142858  |
| C  | 3.108434 | 1.682579  | -0.809988 |
| H  | 4.170830 | 1.924144  | -0.630018 |
| C  | 2.283992 | 2.907126  | -0.407107 |
| H  | 1.207828 | 2.672303  | -0.510262 |
| H  | 2.445935 | 3.152518  | 0.652585  |
| C  | 2.646111 | 4.113408  | -1.267882 |
| H  | 2.054131 | 4.985449  | -0.959061 |
| H  | 3.702837 | 4.378065  | -1.093509 |
| C  | 2.442345 | 3.822195  | -2.748871 |
| H  | 2.710202 | 4.696688  | -3.358496 |
| H  | 1.371386 | 3.629293  | -2.927149 |
| C  | 3.246934 | 2.600688  | -3.175553 |
| H  | 4.323627 | 2.826216  | -3.093928 |
| H  | 3.061185 | 2.361667  | -4.232611 |
| C  | 2.916755 | 1.396106  | -2.303182 |
| H  | 3.516584 | 0.526193  | -2.611318 |
| H  | 1.861254 | 1.104748  | -2.452798 |
| C  | 4.084771 | -0.997451 | -0.335753 |
| H  | 3.733851 | -1.403668 | -1.302341 |
| C  | 5.472750 | -0.396682 | -0.584410 |
| H  | 5.866605 | 0.050315  | 0.340857  |
| H  | 5.418008 | 0.417584  | -1.319894 |
| C  | 6.448263 | -1.460058 | -1.083901 |
| H  | 6.102119 | -1.827415 | -2.065378 |
| H  | 7.439162 | -1.016072 | -1.252346 |
| C  | 6.538518 | -2.634822 | -0.118791 |
| H  | 6.951444 | -2.283428 | 0.841520  |
| H  | 7.237197 | -3.393683 | -0.496694 |
| C  | 5.160756 | -3.240305 | 0.115679  |
| H  | 5.217298 | -4.080569 | 0.821927  |
| H  | 4.786489 | -3.655494 | -0.833691 |
| C  | 4.173025 | -2.192868 | 0.618227  |

S-90

|    |           |           |           |
|----|-----------|-----------|-----------|
| H  | 3.173545  | -2.634919 | 0.756458  |
| H  | 4.502640  | -1.844620 | 1.611413  |
| C  | 2.940863  | 0.669312  | 1.911091  |
| H  | 2.318955  | 1.579988  | 1.957769  |
| C  | 2.309408  | -0.304132 | 2.912013  |
| H  | 1.281652  | -0.527230 | 2.586731  |
| H  | 2.850583  | -1.263745 | 2.904516  |
| C  | 2.324179  | 0.272757  | 4.323446  |
| H  | 1.901456  | -0.450141 | 5.035554  |
| H  | 1.667138  | 1.157836  | 4.353740  |
| C  | 3.729091  | 0.685132  | 4.748981  |
| H  | 3.715904  | 1.123369  | 5.756301  |
| H  | 4.367176  | -0.212059 | 4.810241  |
| C  | 4.340546  | 1.660184  | 3.749242  |
| H  | 5.357051  | 1.943429  | 4.055637  |
| H  | 3.747171  | 2.590612  | 3.740656  |
| C  | 4.352387  | 1.068918  | 2.341755  |
| H  | 5.007145  | 0.182043  | 2.333580  |
| H  | 4.789882  | 1.783661  | 1.628448  |
| Al | -1.755817 | 0.142762  | 0.289646  |
| N  | -2.723455 | 1.858985  | 0.433276  |
| N  | -3.381973 | -0.828532 | 0.831594  |
| C  | -3.936101 | 2.070613  | 0.958689  |
| C  | -4.712284 | 1.044365  | 1.515211  |
| H  | -5.647500 | 1.342736  | 1.979850  |
| C  | -4.471653 | -0.332432 | 1.424963  |
| C  | -4.524364 | 3.453040  | 0.950212  |
| H  | -3.944406 | 4.144417  | 1.574383  |
| H  | -5.555454 | 3.446913  | 1.313225  |
| H  | -4.509307 | 3.875128  | -0.062130 |
| C  | -5.509211 | -1.267613 | 1.973875  |
| H  | -6.351127 | -0.722786 | 2.409481  |
| H  | -5.075865 | -1.916902 | 2.745701  |
| H  | -5.889619 | -1.938038 | 1.192677  |
| C  | -2.021725 | 2.972266  | -0.140446 |
| C  | -1.381993 | 3.907518  | 0.701188  |
| C  | -0.717158 | 4.982846  | 0.110989  |
| H  | -0.213559 | 5.711709  | 0.745768  |
| C  | -0.670925 | 5.132053  | -1.270812 |
| H  | -0.150644 | 5.980573  | -1.713333 |
| C  | -1.262358 | 4.176973  | -2.084204 |
| H  | -1.199378 | 4.276966  | -3.168525 |
| C  | -1.935228 | 3.077763  | -1.542485 |
| C  | -1.331053 | 3.713658  | 2.204522  |
| H  | -2.159034 | 3.053407  | 2.496583  |
| C  | -0.033354 | 2.998095  | 2.586078  |
| H  | 0.085880  | 2.055644  | 2.028564  |
| H  | -0.010079 | 2.771987  | 3.660521  |
| H  | 0.837493  | 3.628893  | 2.355137  |
| C  | -1.484521 | 5.013233  | 2.988609  |
| H  | -0.624710 | 5.680247  | 2.847539  |
| H  | -1.553504 | 4.805749  | 4.063047  |
| H  | -2.383481 | 5.569754  | 2.693587  |
| C  | -2.518422 | 2.041877  | -2.483843 |
| H  | -3.013152 | 1.269039  | -1.876202 |
| C  | -1.408086 | 1.357765  | -3.283412 |
| H  | -1.817322 | 0.561795  | -3.921422 |
| H  | -0.664292 | 0.906696  | -2.606805 |
| H  | -0.885790 | 2.072211  | -3.935904 |

|   |           |           |           |
|---|-----------|-----------|-----------|
| C | -3.584850 | 2.631065  | -3.403973 |
| H | -4.408914 | 3.079437  | -2.834844 |
| H | -4.007487 | 1.852634  | -4.052585 |
| H | -3.168908 | 3.411207  | -4.055237 |
| C | -3.326820 | -2.236530 | 0.557006  |
| C | -3.686016 | -2.672012 | -0.739371 |
| C | -3.655042 | -4.042311 | -1.005090 |
| H | -3.931141 | -4.401911 | -1.994419 |
| C | -3.242087 | -4.954762 | -0.039907 |
| H | -3.220387 | -6.018577 | -0.269918 |
| C | -2.817340 | -4.499742 | 1.200134  |
| H | -2.442656 | -5.210767 | 1.937006  |
| C | -2.844014 | -3.138982 | 1.521447  |
| C | -4.026332 | -1.670071 | -1.828996 |
| H | -3.329004 | -0.823385 | -1.694076 |
| C | -3.790838 | -2.206040 | -3.236296 |
| H | -4.530313 | -2.968722 | -3.514376 |
| H | -2.793269 | -2.648415 | -3.345423 |
| H | -3.883531 | -1.391678 | -3.965740 |
| C | -5.445415 | -1.111697 | -1.716598 |
| H | -6.187673 | -1.919326 | -1.779318 |
| H | -5.646829 | -0.411233 | -2.537929 |
| H | -5.611922 | -0.569196 | -0.779749 |
| C | -2.267731 | -2.672930 | 2.842605  |
| H | -2.504843 | -1.605726 | 2.961503  |
| C | -0.742593 | -2.808289 | 2.810805  |
| H | -0.448858 | -3.863647 | 2.720983  |
| H | -0.293385 | -2.412759 | 3.731737  |
| H | -0.307216 | -2.264282 | 1.956555  |
| C | -2.852500 | -3.418655 | 4.039579  |
| H | -3.947354 | -3.349947 | 4.076563  |
| H | -2.457924 | -3.011758 | 4.978411  |
| H | -2.593598 | -4.485107 | 4.015597  |
| H | -0.509586 | -1.629105 | -2.511887 |
| C | 0.233588  | -2.362036 | -2.198042 |
| C | 1.445928  | -2.462503 | -2.894687 |
| C | -0.048298 | -3.206896 | -1.119005 |
| C | 2.367100  | -3.431690 | -2.482439 |
| C | 0.883317  | -4.164117 | -0.721852 |
| H | -0.998635 | -3.112302 | -0.595808 |
| C | 2.089963  | -4.277265 | -1.410093 |
| H | 2.824988  | -5.021336 | -1.104278 |
| H | 3.321688  | -3.515271 | -3.006601 |
| H | 0.665599  | -4.816636 | 0.122948  |
| C | 1.729994  | -1.571004 | -4.066034 |
| H | 2.801563  | -1.352956 | -4.160470 |
| H | 1.414527  | -2.032956 | -5.012274 |
| H | 1.199424  | -0.614348 | -3.980223 |

Int-2b-toluene\_ortho2.log

SCF (wB97x) = -2687.87046957

H(0 K)= -2686.614098

H(298 K)= -2686.548548

G(298 K)= -2686.715959

Lowest Frequency = 11.2965cm<sup>-1</sup>

Pd 0.462414 -0.238147 0.416958

P 2.750668 0.158874 0.205540

**S-92**

|    |           |           |           |
|----|-----------|-----------|-----------|
| C  | 3.073565  | 1.357976  | -1.182084 |
| H  | 4.163404  | 1.505376  | -1.284876 |
| C  | 2.433832  | 2.728457  | -0.947065 |
| H  | 1.346701  | 2.593385  | -0.794509 |
| H  | 2.819189  | 3.193170  | -0.027659 |
| C  | 2.687482  | 3.655727  | -2.131075 |
| H  | 2.231986  | 4.637346  | -1.942559 |
| H  | 3.772255  | 3.830582  | -2.229046 |
| C  | 2.154124  | 3.059042  | -3.426625 |
| H  | 2.353366  | 3.728026  | -4.275649 |
| H  | 1.058367  | 2.971675  | -3.343520 |
| C  | 2.745786  | 1.677646  | -3.678016 |
| H  | 3.827211  | 1.773669  | -3.873671 |
| H  | 2.308473  | 1.228200  | -4.581741 |
| C  | 2.529546  | 0.757330  | -2.483272 |
| H  | 2.972891  | -0.230707 | -2.677063 |
| H  | 1.449482  | 0.576209  | -2.336656 |
| C  | 3.874133  | -1.272656 | -0.256693 |
| H  | 3.252227  | -1.838933 | -0.975037 |
| C  | 5.195476  | -0.948207 | -0.962733 |
| H  | 5.840317  | -0.345933 | -0.304363 |
| H  | 5.016540  | -0.339613 | -1.859075 |
| C  | 5.933315  | -2.224091 | -1.358577 |
| H  | 5.319501  | -2.776383 | -2.089972 |
| H  | 6.875341  | -1.974332 | -1.866200 |
| C  | 6.189840  | -3.113541 | -0.149420 |
| H  | 6.853666  | -2.584205 | 0.554797  |
| H  | 6.720599  | -4.028600 | -0.445874 |
| C  | 4.880241  | -3.456880 | 0.548588  |
| H  | 5.062632  | -4.079084 | 1.435842  |
| H  | 4.258489  | -4.055383 | -0.134308 |
| C  | 4.111973  | -2.198801 | 0.941403  |
| H  | 3.149115  | -2.461367 | 1.407491  |
| H  | 4.690639  | -1.660036 | 1.709883  |
| C  | 3.486374  | 1.032944  | 1.679383  |
| H  | 2.981670  | 2.013709  | 1.620108  |
| C  | 3.027899  | 0.420925  | 3.008208  |
| H  | 1.936433  | 0.272305  | 2.978794  |
| H  | 3.471156  | -0.578922 | 3.137252  |
| C  | 3.433551  | 1.305520  | 4.182391  |
| H  | 3.120800  | 0.847988  | 5.131063  |
| H  | 2.896615  | 2.265989  | 4.109029  |
| C  | 4.934325  | 1.575282  | 4.186185  |
| H  | 5.208561  | 2.228749  | 5.025553  |
| H  | 5.472116  | 0.625861  | 4.344748  |
| C  | 5.384787  | 2.186598  | 2.864476  |
| H  | 6.469602  | 2.361078  | 2.867213  |
| H  | 4.911536  | 3.175345  | 2.743275  |
| C  | 4.992056  | 1.302072  | 1.683777  |
| H  | 5.537140  | 0.346773  | 1.756541  |
| H  | 5.306864  | 1.766038  | 0.736946  |
| Al | -1.865261 | 0.248434  | 0.542860  |
| N  | -2.766998 | 1.971428  | 0.322430  |
| N  | -3.594354 | -0.661844 | 0.716787  |
| C  | -4.039085 | 2.261243  | 0.616776  |
| C  | -4.963655 | 1.286868  | 1.016798  |
| H  | -5.959496 | 1.638323  | 1.269849  |
| C  | -4.775244 | -0.101322 | 1.001575  |
| C  | -4.524071 | 3.675679  | 0.490921  |

|   |           |           |           |
|---|-----------|-----------|-----------|
| H | -3.894497 | 4.362722  | 1.069902  |
| H | -5.559137 | 3.774895  | 0.828057  |
| H | -4.462733 | 4.018050  | -0.549911 |
| C | -5.964731 | -0.972516 | 1.281951  |
| H | -6.872720 | -0.378048 | 1.413211  |
| H | -5.809390 | -1.571428 | 2.188664  |
| H | -6.126165 | -1.690243 | 0.467952  |
| C | -1.951483 | 3.005122  | -0.255992 |
| C | -1.180325 | 3.847901  | 0.566071  |
| C | -0.437260 | 4.863175  | -0.042234 |
| H | 0.163885  | 5.525614  | 0.581627  |
| C | -0.443198 | 5.034904  | -1.420237 |
| H | 0.128703  | 5.842284  | -1.875029 |
| C | -1.159667 | 4.153082  | -2.219907 |
| H | -1.128168 | 4.262175  | -3.304333 |
| C | -1.914007 | 3.119681  | -1.660370 |
| C | -1.091440 | 3.656320  | 2.066388  |
| H | -1.816977 | 2.882073  | 2.354334  |
| C | 0.300749  | 3.146675  | 2.446453  |
| H | 0.541669  | 2.217345  | 1.903686  |
| H | 0.360572  | 2.941034  | 3.523729  |
| H | 1.070826  | 3.894016  | 2.203873  |
| C | -1.435249 | 4.927903  | 2.839004  |
| H | -0.715371 | 5.730578  | 2.632451  |
| H | -1.412056 | 4.741848  | 3.919625  |
| H | -2.432441 | 5.310034  | 2.585403  |
| C | -2.604390 | 2.120465  | -2.569760 |
| H | -3.273291 | 1.498924  | -1.955358 |
| C | -1.562690 | 1.190869  | -3.199565 |
| H | -2.044460 | 0.425009  | -3.823098 |
| H | -0.961846 | 0.681210  | -2.428554 |
| H | -0.867842 | 1.754402  | -3.839161 |
| C | -3.459928 | 2.787088  | -3.643557 |
| H | -4.213782 | 3.455344  | -3.209529 |
| H | -3.984297 | 2.032755  | -4.243094 |
| H | -2.851095 | 3.382495  | -4.336040 |
| C | -3.519538 | -2.089261 | 0.574137  |
| C | -3.464377 | -2.631312 | -0.730171 |
| C | -3.387563 | -4.020595 | -0.858546 |
| H | -3.342793 | -4.464704 | -1.850422 |
| C | -3.349089 | -4.848460 | 0.257666  |
| H | -3.288658 | -5.928105 | 0.131863  |
| C | -3.352587 | -4.293366 | 1.529158  |
| H | -3.276163 | -4.942652 | 2.401183  |
| C | -3.426044 | -2.910165 | 1.713761  |
| C | -3.472037 | -1.734106 | -1.957490 |
| H | -2.784817 | -0.892984 | -1.743621 |
| C | -2.951663 | -2.423617 | -3.213420 |
| H | -3.651108 | -3.190250 | -3.572811 |
| H | -1.977543 | -2.899768 | -3.053264 |
| H | -2.839133 | -1.693050 | -4.023630 |
| C | -4.850140 | -1.132273 | -2.241785 |
| H | -5.595391 | -1.925048 | -2.393547 |
| H | -4.819247 | -0.528261 | -3.158461 |
| H | -5.204601 | -0.481389 | -1.435225 |
| C | -3.301117 | -2.332034 | 3.109407  |
| H | -3.612599 | -1.278293 | 3.076576  |
| C | -1.833406 | -2.363072 | 3.544253  |
| H | -1.467990 | -3.398261 | 3.594543  |

|   |           |           |           |
|---|-----------|-----------|-----------|
| H | -1.707797 | -1.912090 | 4.537027  |
| H | -1.190291 | -1.819368 | 2.836024  |
| C | -4.184448 | -3.042413 | 4.131513  |
| H | -5.236744 | -3.070798 | 3.820225  |
| H | -4.133430 | -2.534726 | 5.102065  |
| H | -3.864340 | -4.079228 | 4.295049  |
| H | -0.386560 | -1.861068 | -1.479097 |
| C | 0.418481  | -2.549500 | -1.744348 |
| C | 1.060675  | -2.442885 | -2.976171 |
| C | 0.794143  | -3.531987 | -0.817501 |
| C | 2.095310  | -3.316944 | -3.307178 |
| C | 1.816477  | -4.415469 | -1.173831 |
| C | 2.466744  | -4.309947 | -2.402766 |
| H | 3.267441  | -5.005778 | -2.652929 |
| H | 2.600275  | -3.231679 | -4.268466 |
| H | 2.114505  | -5.193279 | -0.468720 |
| H | 0.750259  | -1.668177 | -3.679110 |
| C | 0.147799  | -3.590741 | 0.531119  |
| H | 0.161766  | -4.603756 | 0.954472  |
| H | 0.667163  | -2.921235 | 1.238065  |
| H | -0.891714 | -3.242490 | 0.496478  |

Int-2b-toluene\_para.log

SCF (wB97x) = -2687.86615618

H(0 K)= -2686.610150

H(298 K)= -2686.544112

G(298 K)= -2686.714100

Lowest Frequency = 8.8271cm<sup>-1</sup>

|    |          |           |           |
|----|----------|-----------|-----------|
| Pd | 0.387922 | -0.282166 | -0.203697 |
| P  | 2.405026 | 0.519436  | 0.629053  |
| C  | 2.945929 | 2.045311  | -0.292392 |
| H  | 3.945484 | 2.354214  | 0.062678  |
| C  | 1.985850 | 3.220441  | -0.088093 |
| H  | 0.965621 | 2.901433  | -0.371998 |
| H  | 1.935648 | 3.507042  | 0.972712  |
| C  | 2.406066 | 4.426351  | -0.921445 |
| H  | 1.706177 | 5.256762  | -0.755503 |
| H  | 3.393069 | 4.779671  | -0.578212 |
| C  | 2.484111 | 4.077765  | -2.401761 |
| H  | 2.795330 | 4.950785  | -2.992407 |
| H  | 1.475168 | 3.802532  | -2.751152 |
| C  | 3.427919 | 2.904472  | -2.634822 |
| H  | 4.458033 | 3.208935  | -2.383872 |
| H  | 3.440187 | 2.622473  | -3.697825 |
| C  | 3.032806 | 1.703806  | -1.784425 |
| H  | 3.726437 | 0.866805  | -1.956127 |
| H  | 2.039665 | 1.335513  | -2.098479 |
| C  | 3.879504 | -0.616292 | 0.412036  |
| H  | 3.676326 | -1.067496 | -0.577317 |
| C  | 5.281487 | -0.003401 | 0.343858  |
| H  | 5.538769 | 0.466456  | 1.306055  |
| H  | 5.323340 | 0.794177  | -0.410185 |
| C  | 6.316823 | -1.074055 | 0.008807  |
| H  | 6.093832 | -1.476636 | -0.994258 |
| H  | 7.320230 | -0.630050 | -0.049940 |
| C  | 6.290460 | -2.210627 | 1.023273  |
| H  | 6.589257 | -1.819062 | 2.009969  |

|    |           |           |           |
|----|-----------|-----------|-----------|
| H  | 7.029674  | -2.980566 | 0.760781  |
| C  | 4.897476  | -2.819840 | 1.124422  |
| H  | 4.874237  | -3.610741 | 1.887010  |
| H  | 4.643030  | -3.299810 | 0.167353  |
| C  | 3.842794  | -1.762301 | 1.428614  |
| H  | 2.837731  | -2.211830 | 1.450662  |
| H  | 4.027139  | -1.358153 | 2.437858  |
| C  | 2.367854  | 1.101071  | 2.399057  |
| H  | 1.716546  | 1.989443  | 2.319639  |
| C  | 1.618178  | 0.129499  | 3.316484  |
| H  | 0.673049  | -0.160109 | 2.833119  |
| H  | 2.196703  | -0.799207 | 3.439727  |
| C  | 1.374582  | 0.752223  | 4.686432  |
| H  | 0.855503  | 0.039674  | 5.343099  |
| H  | 0.699858  | 1.617222  | 4.572021  |
| C  | 2.678719  | 1.219268  | 5.324397  |
| H  | 2.488229  | 1.687101  | 6.299943  |
| H  | 3.318227  | 0.342852  | 5.521230  |
| C  | 3.425604  | 2.182383  | 4.408002  |
| H  | 4.372660  | 2.498048  | 4.867091  |
| H  | 2.823495  | 3.097386  | 4.277519  |
| C  | 3.679709  | 1.559861  | 3.036937  |
| H  | 4.353595  | 0.695397  | 3.155300  |
| H  | 4.203954  | 2.273237  | 2.383333  |
| Al | -1.978955 | -0.182720 | -0.319329 |
| N  | -3.111546 | 1.404151  | -0.527192 |
| N  | -3.539809 | -1.278161 | 0.151509  |
| C  | -4.445003 | 1.480570  | -0.442616 |
| C  | -5.250730 | 0.382459  | -0.114992 |
| H  | -6.320499 | 0.564547  | -0.070290 |
| C  | -4.824231 | -0.912420 | 0.206526  |
| C  | -5.128493 | 2.796201  | -0.679025 |
| H  | -4.871347 | 3.517025  | 0.108176  |
| H  | -6.215624 | 2.682608  | -0.697409 |
| H  | -4.800791 | 3.251203  | -1.621425 |
| C  | -5.865448 | -1.900225 | 0.649844  |
| H  | -6.873354 | -1.542760 | 0.420946  |
| H  | -5.804819 | -2.063335 | 1.734424  |
| H  | -5.718142 | -2.881327 | 0.184741  |
| C  | -2.379599 | 2.615274  | -0.779698 |
| C  | -2.093212 | 3.483317  | 0.294116  |
| C  | -1.417207 | 4.674079  | 0.021112  |
| H  | -1.185116 | 5.354701  | 0.840612  |
| C  | -1.023868 | 4.998545  | -1.271965 |
| H  | -0.512894 | 5.939567  | -1.470559 |
| C  | -1.256889 | 4.101335  | -2.304966 |
| H  | -0.911967 | 4.336977  | -3.312463 |
| C  | -1.920866 | 2.892056  | -2.081101 |
| C  | -2.422235 | 3.116120  | 1.728736  |
| H  | -3.130238 | 2.273967  | 1.718673  |
| C  | -1.152604 | 2.634058  | 2.436595  |
| H  | -0.684864 | 1.794718  | 1.895477  |
| H  | -1.374519 | 2.306802  | 3.461296  |
| H  | -0.410860 | 3.444579  | 2.495500  |
| C  | -3.074628 | 4.257484  | 2.503924  |
| H  | -2.389184 | 5.104802  | 2.633172  |
| H  | -3.365334 | 3.924062  | 3.507400  |
| H  | -3.973640 | 4.637156  | 2.001811  |
| C  | -2.078407 | 1.916900  | -3.230504 |



|   |           |           |           |
|---|-----------|-----------|-----------|
| H | -2.648650 | 1.048575  | -2.867978 |
| C | -0.704706 | 1.410734  | -3.675428 |
| H | -0.801126 | 0.636199  | -4.448550 |
| H | -0.157582 | 0.980831  | -2.821377 |
| H | -0.094999 | 2.226404  | -4.091227 |
| C | -2.853709 | 2.518845  | -4.399979 |
| H | -3.854136 | 2.852702  | -4.097668 |
| H | -2.973188 | 1.784683  | -5.206135 |
| H | -2.330915 | 3.386639  | -4.823088 |
| C | -3.171019 | -2.609970 | 0.538456  |
| C | -2.838834 | -3.541367 | -0.468202 |
| C | -2.427387 | -4.815299 | -0.069502 |
| H | -2.167596 | -5.553960 | -0.825352 |
| C | -2.332889 | -5.153878 | 1.275313  |
| H | -2.010390 | -6.153086 | 1.563330  |
| C | -2.635296 | -4.212608 | 2.250473  |
| H | -2.534476 | -4.477964 | 3.302236  |
| C | -3.052311 | -2.924856 | 1.906005  |
| C | -2.932986 | -3.171433 | -1.937751 |
| H | -2.561197 | -2.135316 | -2.032778 |
| C | -2.058724 | -4.032722 | -2.840403 |
| H | -2.436708 | -5.060943 | -2.917983 |
| H | -1.021778 | -4.077595 | -2.487804 |
| H | -2.046101 | -3.618616 | -3.855433 |
| C | -4.378125 | -3.183816 | -2.438366 |
| H | -4.834922 | -4.171702 | -2.288599 |
| H | -4.416412 | -2.958902 | -3.511668 |
| H | -5.001085 | -2.441984 | -1.926311 |
| C | -3.279915 | -1.881028 | 2.984300  |
| H | -3.913173 | -1.084104 | 2.568535  |
| C | -1.949557 | -1.232367 | 3.372519  |
| H | -1.260667 | -1.975961 | 3.796853  |
| H | -2.096953 | -0.441062 | 4.120139  |
| H | -1.444553 | -0.790815 | 2.499201  |
| C | -3.993985 | -2.434986 | 4.213420  |
| H | -4.926086 | -2.951087 | 3.950050  |
| H | -4.240137 | -1.625071 | 4.910365  |
| H | -3.367210 | -3.148482 | 4.763072  |
| H | 0.386441  | -1.296818 | -2.552431 |
| C | 1.349757  | -1.807214 | -2.562512 |
| C | 2.379272  | -1.381942 | -3.398384 |
| C | 1.557628  | -2.901896 | -1.718849 |
| C | 3.600464  | -2.055422 | -3.404474 |
| H | 2.232350  | -0.515091 | -4.043453 |
| C | 2.772799  | -3.578485 | -1.740541 |
| H | 0.761424  | -3.211290 | -1.038431 |
| C | 3.812371  | -3.171839 | -2.590173 |
| H | 4.403388  | -1.717398 | -4.061441 |
| H | 2.925378  | -4.437765 | -1.085407 |
| C | 5.107445  | -3.926865 | -2.638069 |
| H | 4.980573  | -4.915695 | -3.099177 |
| H | 5.865838  | -3.390707 | -3.219890 |
| H | 5.521263  | -4.101499 | -1.635509 |

Int-2c\_cc-PdP2--HPh.log

SCF (wB97x) = -2454.38727320

H(0 K)= -2453.311967

H(298 K)= -2453.263411

**S-97**

G(298 K)= -2453.396863  
Lowest Frequency = 10.2098cm-1

|    |           |           |           |
|----|-----------|-----------|-----------|
| Pd | -0.116869 | 0.309350  | -0.467925 |
| P  | 2.163128  | 0.428686  | -0.059944 |
| P  | -2.402690 | 0.250592  | -0.199195 |
| C  | -2.723999 | 0.292792  | 1.642477  |
| C  | -4.110455 | 0.648328  | 2.190127  |
| C  | -2.198867 | -1.010690 | 2.261824  |
| H  | -2.035428 | 1.091277  | 1.973218  |
| C  | -4.095286 | 0.694889  | 3.717198  |
| H  | -4.860200 | -0.082847 | 1.853925  |
| H  | -4.437104 | 1.621243  | 1.800040  |
| C  | -2.197146 | -0.946194 | 3.783853  |
| H  | -2.833050 | -1.854765 | 1.940478  |
| H  | -1.187796 | -1.216418 | 1.871831  |
| C  | -3.583380 | -0.607552 | 4.319548  |
| H  | -5.099182 | 0.929602  | 4.096394  |
| H  | -3.441595 | 1.521249  | 4.041434  |
| H  | -1.837397 | -1.895464 | 4.204488  |
| H  | -1.482410 | -0.172078 | 4.109091  |
| H  | -3.571569 | -0.545723 | 5.416020  |
| H  | -4.279212 | -1.423628 | 4.062809  |
| C  | -3.208161 | -1.310976 | -0.832137 |
| C  | -4.600031 | -1.732353 | -0.349227 |
| C  | -3.121027 | -1.336816 | -2.363652 |
| H  | -2.508344 | -2.084493 | -0.465234 |
| C  | -4.983588 | -3.093807 | -0.926227 |
| H  | -5.353992 | -0.986331 | -0.639046 |
| H  | -4.624401 | -1.782718 | 0.746774  |
| C  | -3.521631 | -2.695994 | -2.925826 |
| H  | -3.786243 | -0.561994 | -2.781133 |
| H  | -2.101024 | -1.065766 | -2.680724 |
| C  | -4.910179 | -3.102109 | -2.447688 |
| H  | -5.987309 | -3.379370 | -0.583284 |
| H  | -4.291993 | -3.856000 | -0.529203 |
| H  | -3.476375 | -2.681528 | -4.023073 |
| H  | -2.789019 | -3.450621 | -2.594472 |
| H  | -5.180976 | -4.090849 | -2.841367 |
| H  | -5.653665 | -2.394026 | -2.849818 |
| C  | -3.307680 | 1.694292  | -0.960598 |
| C  | -4.834100 | 1.661515  | -1.089481 |
| C  | -2.823612 | 2.985389  | -0.284927 |
| H  | -2.900410 | 1.707651  | -1.987610 |
| C  | -5.358103 | 2.922751  | -1.773572 |
| H  | -5.303571 | 1.560566  | -0.099923 |
| H  | -5.144517 | 0.780504  | -1.666634 |
| C  | -3.370139 | 4.226565  | -0.979518 |
| H  | -3.149224 | 2.994377  | 0.768664  |
| H  | -1.722192 | 2.993844  | -0.265875 |
| C  | -4.890953 | 4.186311  | -1.063058 |
| H  | -6.454639 | 2.890425  | -1.831005 |
| H  | -4.994741 | 2.942220  | -2.814218 |
| H  | -3.032902 | 5.131477  | -0.456191 |
| H  | -2.953070 | 4.283572  | -1.997972 |
| H  | -5.275699 | 5.079601  | -1.573145 |
| H  | -5.311028 | 4.206271  | -0.043565 |
| C  | 2.546739  | -0.830631 | 1.261076  |
| C  | 3.995275  | -1.266632 | 1.499064  |

|   |           |           |           |
|---|-----------|-----------|-----------|
| C | 1.858134  | -0.436946 | 2.572560  |
| H | 2.011813  | -1.719140 | 0.879300  |
| C | 4.058514  | -2.382350 | 2.540926  |
| H | 4.607149  | -0.415637 | 1.837530  |
| H | 4.444849  | -1.619105 | 0.558834  |
| C | 1.928132  | -1.566142 | 3.592703  |
| H | 2.344499  | 0.459435  | 2.994049  |
| H | 0.813422  | -0.152752 | 2.362997  |
| C | 3.372758  | -1.984923 | 3.842420  |
| H | 5.103172  | -2.669250 | 2.724768  |
| H | 3.556074  | -3.273297 | 2.130735  |
| H | 1.443425  | -1.265140 | 4.531925  |
| H | 1.358352  | -2.429375 | 3.208407  |
| H | 3.418336  | -2.809334 | 4.566988  |
| H | 3.917818  | -1.141747 | 4.298889  |
| C | 2.598298  | 2.098628  | 0.651738  |
| C | 3.919668  | 2.318620  | 1.395155  |
| C | 2.384267  | 3.183784  | -0.410827 |
| H | 1.789333  | 2.226905  | 1.394404  |
| C | 3.962007  | 3.716076  | 2.010447  |
| H | 4.769578  | 2.203938  | 0.707812  |
| H | 4.052194  | 1.563188  | 2.181146  |
| C | 2.448328  | 4.579129  | 0.199306  |
| H | 3.162760  | 3.092394  | -1.187952 |
| H | 1.419144  | 3.019181  | -0.914884 |
| C | 3.753550  | 4.796232  | 0.955805  |
| H | 4.913511  | 3.868772  | 2.537933  |
| H | 3.168987  | 3.796178  | 2.772352  |
| H | 2.321334  | 5.342179  | -0.580668 |
| H | 1.600922  | 4.701676  | 0.893753  |
| H | 3.773180  | 5.793421  | 1.415893  |
| H | 4.593402  | 4.768426  | 0.241886  |
| C | 3.360661  | 0.014101  | -1.428644 |
| C | 2.771155  | 0.366411  | -2.800020 |
| C | 4.802486  | 0.520842  | -1.335634 |
| H | 3.394976  | -1.089136 | -1.372774 |
| C | 3.621205  | -0.209335 | -3.927379 |
| H | 2.714561  | 1.463432  | -2.901683 |
| H | 1.731453  | 0.009332  | -2.859071 |
| C | 5.654748  | -0.071838 | -2.455041 |
| H | 4.807463  | 1.619740  | -1.425535 |
| H | 5.244005  | 0.289002  | -0.358176 |
| C | 5.071703  | 0.249254  | -3.825730 |
| H | 3.197654  | 0.061010  | -4.904206 |
| H | 3.589219  | -1.311437 | -3.870672 |
| H | 6.689103  | 0.290750  | -2.380049 |
| H | 5.699902  | -1.166837 | -2.324995 |
| H | 5.678345  | -0.206026 | -4.620129 |
| H | 5.116985  | 1.338624  | -3.987812 |
| H | -0.560500 | -2.264732 | -1.454471 |
| C | 0.240936  | -2.896691 | -1.079886 |
| C | 0.072694  | -3.628642 | 0.095681  |
| C | 1.452512  | -2.956024 | -1.767389 |
| C | 1.115752  | -4.414435 | 0.582877  |
| C | 2.496967  | -3.738538 | -1.278868 |
| C | 2.328695  | -4.470765 | -0.103971 |
| H | 1.581548  | -2.374659 | -2.680258 |
| H | 3.445485  | -3.775727 | -1.815919 |
| H | 3.143638  | -5.083857 | 0.278255  |

|   |           |           |          |
|---|-----------|-----------|----------|
| H | 0.984966  | -4.983917 | 1.502427 |
| H | -0.873441 | -3.578115 | 0.636001 |

Int-3a\_p1-PdAl2.log

SCF (wB97x) = -2842.69876690

H(0 K)= -2841.319241

H(298 K)= -2841.241048

G(298 K)= -2841.429732

Lowest Frequency = 14.6418cm<sup>-1</sup>

|    |           |           |           |
|----|-----------|-----------|-----------|
| Pd | -0.176262 | -0.413391 | 1.334739  |
| Al | -1.487511 | 0.246926  | -0.447890 |
| N  | -2.542600 | 1.865376  | -0.177131 |
| N  | -2.334711 | -0.128733 | -2.156828 |
| C  | -3.189094 | 2.540248  | -1.131953 |
| C  | -3.367175 | 2.034311  | -2.427805 |
| H  | -3.920122 | 2.663008  | -3.119362 |
| C  | -3.079140 | 0.739206  | -2.863647 |
| C  | -3.822676 | 3.864200  | -0.819353 |
| H  | -4.561997 | 3.765729  | -0.014622 |
| H  | -4.315768 | 4.284631  | -1.699804 |
| H  | -3.076917 | 4.580611  | -0.455024 |
| C  | -3.720194 | 0.303623  | -4.151067 |
| H  | -3.076396 | -0.343611 | -4.754179 |
| H  | -4.022225 | 1.169836  | -4.746610 |
| H  | -4.626056 | -0.280613 | -3.935597 |
| C  | -2.679509 | 2.363590  | 1.172177  |
| C  | -3.719521 | 1.839963  | 1.968369  |
| C  | -3.951020 | 2.429554  | 3.211887  |
| H  | -4.742957 | 2.038249  | 3.847381  |
| C  | -3.163485 | 3.477943  | 3.672490  |
| H  | -3.364062 | 3.924370  | 4.645229  |
| C  | -2.089095 | 3.914219  | 2.911577  |
| H  | -1.432314 | 4.694604  | 3.297406  |
| C  | -1.818632 | 3.360942  | 1.656182  |
| C  | -4.538237 | 0.645080  | 1.515259  |
| H  | -3.856741 | -0.001966 | 0.935298  |
| C  | -5.045913 | -0.189973 | 2.685055  |
| H  | -4.241377 | -0.430239 | 3.389571  |
| H  | -5.469093 | -1.133788 | 2.320366  |
| H  | -5.846632 | 0.324350  | 3.233891  |
| C  | -5.700303 | 1.033704  | 0.599028  |
| H  | -6.376978 | 1.736225  | 1.105512  |
| H  | -6.289492 | 0.145672  | 0.330954  |
| H  | -5.367925 | 1.500044  | -0.336748 |
| C  | -0.572222 | 3.791778  | 0.913853  |
| H  | -0.545608 | 3.268286  | -0.053362 |
| C  | 0.657353  | 3.352756  | 1.707486  |
| H  | 1.576143  | 3.611691  | 1.168496  |
| H  | 0.649301  | 2.266955  | 1.883713  |
| H  | 0.690128  | 3.850277  | 2.687246  |
| C  | -0.518381 | 5.292151  | 0.635593  |
| H  | -1.369666 | 5.640538  | 0.036249  |
| H  | 0.400425  | 5.543464  | 0.090094  |
| H  | -0.516094 | 5.872247  | 1.568051  |
| C  | -2.251311 | -1.471456 | -2.666848 |
| C  | -1.128330 | -1.854130 | -3.425029 |
| C  | -1.115283 | -3.138660 | -3.976847 |

S-100

|    |           |           |           |
|----|-----------|-----------|-----------|
| H  | -0.264066 | -3.448871 | -4.582570 |
| C  | -2.172783 | -4.018243 | -3.781753 |
| H  | -2.144974 | -5.011824 | -4.225916 |
| C  | -3.259733 | -3.630373 | -3.007848 |
| H  | -4.075509 | -4.332018 | -2.837537 |
| C  | -3.320341 | -2.359511 | -2.431832 |
| C  | 0.000309  | -0.885631 | -3.719206 |
| H  | -0.047155 | -0.082603 | -2.968045 |
| C  | 1.379339  | -1.521305 | -3.602597 |
| H  | 1.532625  | -2.333828 | -4.325587 |
| H  | 1.552378  | -1.931933 | -2.599869 |
| H  | 2.160218  | -0.773340 | -3.793603 |
| C  | -0.165766 | -0.241165 | -5.095886 |
| H  | -0.187054 | -1.001935 | -5.888156 |
| H  | 0.674275  | 0.434408  | -5.306612 |
| H  | -1.089155 | 0.345564  | -5.172372 |
| C  | -4.483879 | -1.989898 | -1.532303 |
| H  | -4.517086 | -0.894002 | -1.437394 |
| C  | -4.257510 | -2.561491 | -0.130527 |
| H  | -4.170902 | -3.656314 | -0.164901 |
| H  | -5.095039 | -2.308868 | 0.532395  |
| H  | -3.337376 | -2.173481 | 0.330921  |
| C  | -5.832649 | -2.441893 | -2.085796 |
| H  | -5.992177 | -2.100079 | -3.116440 |
| H  | -6.649500 | -2.048045 | -1.469488 |
| H  | -5.930241 | -3.534913 | -2.083106 |
| Al | 1.782706  | -0.161696 | -0.076443 |
| N  | 2.818730  | -1.827721 | -0.161468 |
| N  | 3.051251  | 0.827678  | -1.150196 |
| C  | 3.842227  | -2.063331 | -0.972228 |
| C  | 4.310026  | -1.103686 | -1.891277 |
| H  | 5.088059  | -1.433522 | -2.574196 |
| C  | 3.994720  | 0.254351  | -1.924060 |
| C  | 4.604085  | -3.354963 | -0.905912 |
| H  | 4.039707  | -4.153500 | -0.416859 |
| H  | 5.534004  | -3.211518 | -0.340303 |
| H  | 4.892752  | -3.678991 | -1.911835 |
| C  | 4.773058  | 1.114362  | -2.878229 |
| H  | 4.109466  | 1.529589  | -3.648593 |
| H  | 5.558203  | 0.540283  | -3.376784 |
| H  | 5.232329  | 1.972876  | -2.374185 |
| C  | 2.527247  | -2.727137 | 0.922821  |
| C  | 3.322575  | -2.690252 | 2.084111  |
| C  | 2.957377  | -3.507086 | 3.157434  |
| H  | 3.557374  | -3.482886 | 4.067501  |
| C  | 1.840407  | -4.326102 | 3.093590  |
| H  | 1.564491  | -4.943709 | 3.946296  |
| C  | 1.064179  | -4.343142 | 1.941427  |
| H  | 0.180018  | -4.976083 | 1.902879  |
| C  | 1.382105  | -3.544505 | 0.841474  |
| C  | 4.527283  | -1.782778 | 2.241116  |
| H  | 4.671253  | -1.218839 | 1.306785  |
| C  | 4.303186  | -0.767251 | 3.361184  |
| H  | 4.155365  | -1.271310 | 4.325114  |
| H  | 3.418110  | -0.148107 | 3.170140  |
| H  | 5.177717  | -0.110982 | 3.465254  |
| C  | 5.803164  | -2.581104 | 2.513193  |
| H  | 6.679768  | -1.920818 | 2.530575  |
| H  | 5.978106  | -3.359867 | 1.761114  |

|   |           |           |           |
|---|-----------|-----------|-----------|
| H | 5.752408  | -3.081416 | 3.489186  |
| C | 0.551247  | -3.598112 | -0.424025 |
| H | 0.531633  | -2.580820 | -0.849444 |
| C | 1.184383  | -4.527303 | -1.459901 |
| H | 2.182270  | -4.186909 | -1.764695 |
| H | 0.560615  | -4.577847 | -2.362139 |
| H | 1.286294  | -5.546119 | -1.060679 |
| C | -0.899219 | -3.975674 | -0.172212 |
| H | -1.478174 | -3.867943 | -1.095992 |
| H | -1.342421 | -3.317970 | 0.587073  |
| H | -1.011191 | -5.017103 | 0.159931  |
| C | 3.047258  | 2.264208  | -1.062890 |
| C | 2.321080  | 3.046942  | -1.981127 |
| C | 2.371577  | 4.438709  | -1.852492 |
| H | 1.802382  | 5.055985  | -2.548309 |
| C | 3.143800  | 5.045234  | -0.872998 |
| H | 3.185453  | 6.131016  | -0.802172 |
| C | 3.851381  | 4.258971  | 0.028052  |
| H | 4.435064  | 4.740059  | 0.810416  |
| C | 3.798664  | 2.864275  | -0.025995 |
| C | 1.501707  | 2.452718  | -3.110189 |
| H | 1.695587  | 1.369208  | -3.139410 |
| C | 0.005830  | 2.649065  | -2.870903 |
| H | -0.250187 | 3.713892  | -2.765714 |
| H | -0.315655 | 2.146090  | -1.947797 |
| H | -0.588400 | 2.241620  | -3.699591 |
| C | 1.887980  | 3.045995  | -4.466180 |
| H | 1.346099  | 2.544854  | -5.277976 |
| H | 2.962033  | 2.957930  | -4.670375 |
| H | 1.634937  | 4.112357  | -4.522066 |
| C | 4.524190  | 2.033004  | 1.018645  |
| H | 3.949062  | 1.103845  | 1.157432  |
| C | 4.580526  | 2.726184  | 2.376478  |
| H | 5.239378  | 3.604182  | 2.366909  |
| H | 4.976130  | 2.041147  | 3.133984  |
| H | 3.585975  | 3.049985  | 2.706477  |
| C | 5.930389  | 1.633467  | 0.567664  |
| H | 6.541067  | 2.519865  | 0.346433  |
| H | 5.916357  | 0.999058  | -0.326831 |
| H | 6.439104  | 1.068066  | 1.360143  |
| H | 1.799288  | 0.130331  | 1.572587  |
| C | -1.296635 | -0.821412 | 3.040777  |
| C | -1.523157 | 0.197741  | 3.986460  |
| C | -1.800026 | -2.093912 | 3.370440  |
| C | -2.191892 | -0.037466 | 5.189031  |
| H | -1.177343 | 1.213815  | 3.774857  |
| C | -2.462661 | -2.343997 | 4.573786  |
| H | -1.663681 | -2.926190 | 2.673722  |
| C | -2.662783 | -1.314364 | 5.492390  |
| H | -2.350388 | 0.784352  | 5.890703  |
| H | -2.831015 | -3.347854 | 4.793469  |
| H | -3.184979 | -1.503939 | 6.430124  |

Int-3b\_p1-PPdAl.log

SCF (wB97x) = -2648.53803854

H(0 K)= -2647.312763

H(298 K)= -2647.249725

G(298 K)= -2647.408844

**S-102**

Lowest Frequency = 20.8571cm<sup>-1</sup>

|    |           |           |           |
|----|-----------|-----------|-----------|
| Pd | 0.863187  | 0.135809  | -1.013540 |
| P  | 2.151331  | -0.005910 | 0.890386  |
| C  | 2.084523  | 1.566136  | 1.877575  |
| H  | 2.771624  | 1.452713  | 2.734958  |
| C  | 0.694716  | 1.893129  | 2.430431  |
| H  | -0.017225 | 1.963535  | 1.588611  |
| H  | 0.328029  | 1.079321  | 3.075353  |
| C  | 0.706084  | 3.209281  | 3.203329  |
| H  | -0.306804 | 3.438615  | 3.565548  |
| H  | 1.340754  | 3.101774  | 4.098814  |
| C  | 1.228302  | 4.356033  | 2.346844  |
| H  | 1.248065  | 5.290493  | 2.924795  |
| H  | 0.530058  | 4.519515  | 1.510119  |
| C  | 2.605662  | 4.036909  | 1.781630  |
| H  | 3.336532  | 3.958189  | 2.604104  |
| H  | 2.956189  | 4.851519  | 1.133433  |
| C  | 2.577591  | 2.726982  | 1.005227  |
| H  | 3.565070  | 2.510595  | 0.573091  |
| H  | 1.888859  | 2.820013  | 0.147897  |
| C  | 3.975543  | -0.208258 | 0.568833  |
| H  | 4.111563  | 0.453622  | -0.304102 |
| C  | 4.982299  | 0.243380  | 1.632200  |
| H  | 4.924745  | -0.405280 | 2.519701  |
| H  | 4.763178  | 1.262480  | 1.979134  |
| C  | 6.397564  | 0.194913  | 1.058952  |
| H  | 6.465989  | 0.918110  | 0.229390  |
| H  | 7.124037  | 0.519336  | 1.816649  |
| C  | 6.746531  | -1.194905 | 0.539469  |
| H  | 6.766168  | -1.900928 | 1.386704  |
| H  | 7.757578  | -1.200680 | 0.110483  |
| C  | 5.725800  | -1.671272 | -0.487417 |
| H  | 5.963281  | -2.689683 | -0.824603 |
| H  | 5.767197  | -1.027787 | -1.380584 |
| C  | 4.312019  | -1.620695 | 0.079724  |
| H  | 3.581307  | -1.942739 | -0.677027 |
| H  | 4.234087  | -2.329989 | 0.921230  |
| C  | 1.603568  | -1.322243 | 2.087793  |
| H  | 0.639237  | -0.920964 | 2.450222  |
| C  | 1.278915  | -2.655194 | 1.399694  |
| H  | 0.562509  | -2.477878 | 0.581025  |
| H  | 2.185372  | -3.069261 | 0.932752  |
| C  | 0.717243  | -3.671551 | 2.389171  |
| H  | 0.544767  | -4.628681 | 1.879406  |
| H  | -0.273074 | -3.329489 | 2.731095  |
| C  | 1.626104  | -3.857168 | 3.597799  |
| H  | 1.185764  | -4.573250 | 4.304907  |
| H  | 2.584359  | -4.294254 | 3.271234  |
| C  | 1.898617  | -2.524362 | 4.282992  |
| H  | 2.558561  | -2.657984 | 5.150913  |
| H  | 0.951323  | -2.113432 | 4.671128  |
| C  | 2.511335  | -1.529691 | 3.302404  |
| H  | 3.484622  | -1.920960 | 2.966412  |
| H  | 2.718824  | -0.571771 | 3.802224  |
| Al | -1.488859 | -0.017501 | -0.649002 |
| N  | -2.860432 | 1.360490  | -0.701223 |
| N  | -2.751536 | -1.423733 | -1.084766 |
| C  | -4.011693 | 1.249341  | -1.376359 |

|   |           |           |           |
|---|-----------|-----------|-----------|
| C | -4.463303 | 0.038854  | -1.921498 |
| H | -5.400051 | 0.077146  | -2.469041 |
| C | -3.922699 | -1.234720 | -1.700161 |
| C | -4.896566 | 2.450974  | -1.534273 |
| H | -5.141382 | 2.890912  | -0.559329 |
| H | -5.826560 | 2.194701  | -2.047864 |
| H | -4.390108 | 3.239566  | -2.104769 |
| C | -4.720494 | -2.424706 | -2.142911 |
| H | -5.611005 | -2.124507 | -2.700794 |
| H | -5.036920 | -3.026223 | -1.281261 |
| H | -4.115748 | -3.092053 | -2.769402 |
| C | -2.582002 | 2.605193  | -0.035856 |
| C | -2.836026 | 2.696326  | 1.350466  |
| C | -2.635766 | 3.929096  | 1.975864  |
| H | -2.835483 | 4.028421  | 3.041032  |
| C | -2.172314 | 5.031013  | 1.266414  |
| H | -2.021825 | 5.982196  | 1.774837  |
| C | -1.861210 | 4.901319  | -0.079198 |
| H | -1.449184 | 5.751667  | -0.622550 |
| C | -2.050114 | 3.692061  | -0.754366 |
| C | -3.294191 | 1.487082  | 2.146502  |
| H | -2.741165 | 0.615291  | 1.749688  |
| C | -2.957472 | 1.590456  | 3.629456  |
| H | -1.901134 | 1.836398  | 3.792836  |
| H | -3.162848 | 0.639319  | 4.133637  |
| H | -3.563423 | 2.354490  | 4.133650  |
| C | -4.785889 | 1.196535  | 1.970881  |
| H | -5.389195 | 2.059420  | 2.284634  |
| H | -5.085736 | 0.340335  | 2.590557  |
| H | -5.048647 | 0.957508  | 0.933815  |
| C | -1.599261 | 3.567429  | -2.195101 |
| H | -1.976249 | 2.616220  | -2.597508 |
| C | -0.071924 | 3.505849  | -2.235889 |
| H | 0.295628  | 3.351363  | -3.257957 |
| H | 0.304635  | 2.670497  | -1.627214 |
| H | 0.367502  | 4.437223  | -1.848463 |
| C | -2.116381 | 4.695568  | -3.084688 |
| H | -3.209553 | 4.789548  | -3.050166 |
| H | -1.827108 | 4.522190  | -4.127746 |
| H | -1.696675 | 5.666465  | -2.791589 |
| C | -2.385775 | -2.755629 | -0.687547 |
| C | -1.577521 | -3.548510 | -1.522365 |
| C | -1.229818 | -4.828779 | -1.081118 |
| H | -0.603442 | -5.453451 | -1.718376 |
| C | -1.663162 | -5.313444 | 0.145326  |
| H | -1.383253 | -6.314791 | 0.468901  |
| C | -2.442796 | -4.507641 | 0.965854  |
| H | -2.762858 | -4.878936 | 1.940349  |
| C | -2.813429 | -3.220299 | 0.573101  |
| C | -1.057444 | -3.057880 | -2.856826 |
| H | -1.457455 | -2.049584 | -3.034277 |
| C | 0.465107  | -2.944403 | -2.827947 |
| H | 0.935367  | -3.926101 | -2.673477 |
| H | 0.796429  | -2.273242 | -2.020421 |
| H | 0.841074  | -2.530212 | -3.771412 |
| C | -1.507332 | -3.955233 | -4.009047 |
| H | -1.097899 | -4.969208 | -3.909225 |
| H | -1.158247 | -3.554522 | -4.968154 |
| H | -2.599663 | -4.048643 | -4.062050 |



|   |           |           |           |
|---|-----------|-----------|-----------|
| C | -3.634404 | -2.363311 | 1.517715  |
| H | -3.862817 | -1.412484 | 1.014622  |
| C | -2.835998 | -2.032889 | 2.778116  |
| H | -2.563911 | -2.944591 | 3.327381  |
| H | -3.424540 | -1.401571 | 3.456949  |
| H | -1.903783 | -1.499330 | 2.538063  |
| C | -4.962821 | -3.022994 | 1.883100  |
| H | -5.563058 | -3.254434 | 0.994699  |
| H | -5.559703 | -2.365977 | 2.528186  |
| H | -4.807497 | -3.963409 | 2.427793  |
| H | -0.373456 | 0.237142  | -2.205661 |
| C | 2.504956  | 0.477556  | -2.315365 |
| C | 3.050121  | 1.765074  | -2.472009 |
| C | 3.177880  | -0.558641 | -2.985099 |
| C | 4.197476  | 2.004435  | -3.231572 |
| H | 2.576698  | 2.618720  | -1.981139 |
| C | 4.323587  | -0.332952 | -3.752029 |
| H | 2.812707  | -1.584663 | -2.903628 |
| C | 4.845828  | 0.952461  | -3.875021 |
| H | 4.586395  | 3.020370  | -3.319797 |
| H | 4.814854  | -1.171072 | -4.249838 |
| H | 5.742697  | 1.132614  | -4.466741 |

Int-4a\_p1-PdAl2-tra.log

SCF (wB97x) = -2842.69110956  
H(0 K)= -2841.314091  
H(298 K)= -2841.234819  
G(298 K)= -2841.429482  
Lowest Frequency = 14.9232cm<sup>-1</sup>

|    |           |           |           |
|----|-----------|-----------|-----------|
| Pd | -0.060423 | -0.063141 | -0.034639 |
| Al | 2.319434  | 0.393671  | 0.373537  |
| N  | 3.257992  | 2.011082  | -0.200316 |
| N  | 3.966573  | -0.322525 | 1.172746  |
| C  | 4.422743  | 2.469630  | 0.268006  |
| C  | 5.257288  | 1.704979  | 1.095520  |
| H  | 6.185724  | 2.172198  | 1.410093  |
| C  | 5.086838  | 0.359874  | 1.443002  |
| C  | 4.897529  | 3.836336  | -0.130406 |
| H  | 4.957523  | 3.928319  | -1.222198 |
| H  | 5.878985  | 4.058383  | 0.296933  |
| H  | 4.189129  | 4.606987  | 0.199718  |
| C  | 6.229743  | -0.333628 | 2.124967  |
| H  | 5.934010  | -0.719492 | 3.108755  |
| H  | 7.081932  | 0.338025  | 2.256920  |
| H  | 6.556520  | -1.205741 | 1.544500  |
| C  | 2.586233  | 2.781594  | -1.214519 |
| C  | 2.771349  | 2.404109  | -2.561355 |
| C  | 2.189530  | 3.200788  | -3.548558 |
| H  | 2.312675  | 2.929303  | -4.595013 |
| C  | 1.410621  | 4.303713  | -3.218529 |
| H  | 0.960155  | 4.906605  | -4.005799 |
| C  | 1.167527  | 4.603194  | -1.885420 |
| H  | 0.510846  | 5.434850  | -1.628665 |
| C  | 1.745388  | 3.850091  | -0.859148 |
| C  | 3.533906  | 1.140621  | -2.920836 |
| H  | 3.253942  | 0.381445  | -2.166182 |
| C  | 3.134034  | 0.569090  | -4.274645 |

S-105

|    |           |           |           |
|----|-----------|-----------|-----------|
| H  | 2.047707  | 0.451833  | -4.361955 |
| H  | 3.595470  | -0.416485 | -4.415045 |
| H  | 3.482938  | 1.202244  | -5.102036 |
| C  | 5.051933  | 1.317607  | -2.855316 |
| H  | 5.380145  | 2.104809  | -3.548275 |
| H  | 5.557210  | 0.387680  | -3.149427 |
| H  | 5.409274  | 1.578784  | -1.852626 |
| C  | 1.388185  | 4.143519  | 0.583278  |
| H  | 2.088520  | 3.593686  | 1.229184  |
| C  | -0.021147 | 3.622719  | 0.873947  |
| H  | -0.294253 | 3.775655  | 1.926750  |
| H  | -0.111908 | 2.546515  | 0.648897  |
| H  | -0.764065 | 4.150512  | 0.259206  |
| C  | 1.498677  | 5.624672  | 0.936192  |
| H  | 2.491556  | 6.033451  | 0.707196  |
| H  | 1.308142  | 5.781021  | 2.004932  |
| H  | 0.763244  | 6.226518  | 0.386930  |
| C  | 3.930183  | -1.726984 | 1.478907  |
| C  | 3.625411  | -2.157410 | 2.785672  |
| C  | 3.591909  | -3.530350 | 3.038960  |
| H  | 3.355419  | -3.878488 | 4.044621  |
| C  | 3.837760  | -4.456009 | 2.032615  |
| H  | 3.804599  | -5.522413 | 2.250191  |
| C  | 4.106174  | -4.014600 | 0.744259  |
| H  | 4.275708  | -4.741244 | -0.050633 |
| C  | 4.157672  | -2.651627 | 0.440004  |
| C  | 3.275105  | -1.182583 | 3.892202  |
| H  | 3.562240  | -0.173364 | 3.564972  |
| C  | 1.762537  | -1.176373 | 4.123953  |
| H  | 1.420496  | -2.164704 | 4.462808  |
| H  | 1.209665  | -0.929649 | 3.206468  |
| H  | 1.489900  | -0.444526 | 4.895222  |
| C  | 4.017030  | -1.475093 | 5.194387  |
| H  | 3.705564  | -2.431799 | 5.632857  |
| H  | 3.808028  | -0.697422 | 5.938848  |
| H  | 5.104328  | -1.520749 | 5.051192  |
| C  | 4.412847  | -2.215897 | -0.990585 |
| H  | 4.599600  | -1.131048 | -0.989332 |
| C  | 3.173180  | -2.474129 | -1.850104 |
| H  | 2.918659  | -3.543807 | -1.863130 |
| H  | 3.334667  | -2.154128 | -2.888032 |
| H  | 2.294002  | -1.932032 | -1.472018 |
| C  | 5.645610  | -2.882894 | -1.595466 |
| H  | 6.544095  | -2.708159 | -0.990657 |
| H  | 5.835082  | -2.493164 | -2.603407 |
| H  | 5.516059  | -3.968848 | -1.689275 |
| Al | -2.290216 | -0.433306 | 0.536482  |
| N  | -3.270878 | -2.065115 | 0.285893  |
| N  | -3.733738 | 0.476588  | 1.420431  |
| C  | -4.448655 | -2.364544 | 0.839564  |
| C  | -5.157893 | -1.457417 | 1.639913  |
| H  | -6.093389 | -1.815528 | 2.059133  |
| C  | -4.861456 | -0.104984 | 1.854460  |
| C  | -5.082209 | -3.693019 | 0.554446  |
| H  | -5.482018 | -3.713726 | -0.468414 |
| H  | -5.906920 | -3.895683 | 1.243070  |
| H  | -4.351015 | -4.507323 | 0.612041  |
| C  | -5.882841 | 0.719164  | 2.581486  |
| H  | -5.497746 | 1.060940  | 3.550208  |

|   |           |           |           |
|---|-----------|-----------|-----------|
| H | -6.798062 | 0.148650  | 2.758530  |
| H | -6.132796 | 1.625462  | 2.016256  |
| C | -2.714962 | -2.942904 | -0.711395 |
| C | -3.238771 | -2.900055 | -2.019787 |
| C | -2.667953 | -3.732249 | -2.983685 |
| H | -3.047395 | -3.698747 | -4.004945 |
| C | -1.609417 | -4.576288 | -2.671639 |
| H | -1.178610 | -5.218384 | -3.438390 |
| C | -1.085375 | -4.576778 | -1.386127 |
| H | -0.238804 | -5.220875 | -1.147521 |
| C | -1.613384 | -3.754470 | -0.386108 |
| C | -4.321209 | -1.917430 | -2.425896 |
| H | -4.777331 | -1.499465 | -1.516375 |
| C | -3.695220 | -0.756664 | -3.201974 |
| H | -3.254740 | -1.106641 | -4.144388 |
| H | -2.878984 | -0.278673 | -2.641783 |
| H | -4.449471 | 0.005073  | -3.443737 |
| C | -5.440711 | -2.566404 | -3.235853 |
| H | -6.238491 | -1.840242 | -3.435704 |
| H | -5.887610 | -3.423270 | -2.715003 |
| H | -5.081540 | -2.925648 | -4.208578 |
| C | -1.001048 | -3.777896 | 0.999524  |
| H | -1.423422 | -2.943336 | 1.577301  |
| C | -1.355845 | -5.071196 | 1.733383  |
| H | -2.441285 | -5.201571 | 1.833944  |
| H | -0.922398 | -5.079800 | 2.741355  |
| H | -0.967262 | -5.947098 | 1.196240  |
| C | 0.509505  | -3.571564 | 0.951100  |
| H | 0.927188  | -3.514108 | 1.964353  |
| H | 0.763576  | -2.633121 | 0.433639  |
| H | 1.020273  | -4.396935 | 0.436577  |
| C | -3.578775 | 1.897848  | 1.587311  |
| C | -3.201860 | 2.431439  | 2.834192  |
| C | -3.115871 | 3.821013  | 2.956446  |
| H | -2.825491 | 4.250849  | 3.915347  |
| C | -3.378963 | 4.656768  | 1.880655  |
| H | -3.313298 | 5.737256  | 1.998397  |
| C | -3.691956 | 4.109168  | 0.642105  |
| H | -3.856243 | 4.767706  | -0.208927 |
| C | -3.782506 | 2.727404  | 0.462925  |
| C | -2.822392 | 1.557484  | 4.013459  |
| H | -3.117696 | 0.522959  | 3.787651  |
| C | -1.303961 | 1.569818  | 4.205734  |
| H | -0.953980 | 2.584140  | 4.443987  |
| H | -0.777618 | 1.233280  | 3.303585  |
| H | -1.014110 | 0.912219  | 5.035293  |
| C | -3.518309 | 1.975314  | 5.307846  |
| H | -3.290529 | 1.266346  | 6.112812  |
| H | -4.609489 | 2.025188  | 5.202055  |
| H | -3.180456 | 2.963881  | 5.644391  |
| C | -4.097676 | 2.140474  | -0.900750 |
| H | -3.507401 | 1.211870  | -1.001896 |
| C | -3.671623 | 3.037615  | -2.056656 |
| H | -4.321616 | 3.917813  | -2.154760 |
| H | -3.725216 | 2.483176  | -3.001037 |
| H | -2.637919 | 3.385733  | -1.937885 |
| C | -5.573032 | 1.758618  | -1.028126 |
| H | -6.216267 | 2.637859  | -0.884802 |
| H | -5.870522 | 0.999584  | -0.294159 |

|   |           |           |           |
|---|-----------|-----------|-----------|
| H | -5.782996 | 1.350479  | -2.025483 |
| H | -0.759033 | -0.346462 | 1.579587  |
| C | -0.174042 | 0.021250  | -2.106128 |
| C | -0.427593 | 1.209642  | -2.815937 |
| C | -0.119947 | -1.158624 | -2.876249 |
| C | -0.622833 | 1.224753  | -4.198502 |
| H | -0.465817 | 2.157956  | -2.272627 |
| C | -0.303152 | -1.153952 | -4.259852 |
| H | 0.046210  | -2.118600 | -2.378608 |
| C | -0.564189 | 0.040171  | -4.933027 |
| H | -0.817475 | 2.173456  | -4.704638 |
| H | -0.259118 | -2.095193 | -4.812619 |
| H | -0.717255 | 0.047731  | -6.012173 |

Int-4b\_p1-PPdAl-tra.log

SCF (wB97x) = -2648.53641223

H(0 K)= -2647.311286

H(298 K)= -2647.247885

G(298 K)= -2647.409065

Lowest Frequency = 14.1507cm<sup>-1</sup>

|    |          |           |           |
|----|----------|-----------|-----------|
| Pd | 0.477276 | -0.225546 | 0.575615  |
| P  | 2.549192 | -0.190497 | -0.598614 |
| C  | 2.591140 | -1.506160 | -1.910559 |
| H  | 3.611603 | -1.558577 | -2.329141 |
| C  | 1.626332 | -1.232711 | -3.066517 |
| H  | 0.608995 | -1.102555 | -2.655029 |
| H  | 1.877171 | -0.290711 | -3.574951 |
| C  | 1.645471 | -2.374041 | -4.079988 |
| H  | 0.942182 | -2.163624 | -4.898234 |
| H  | 2.644952 | -2.424358 | -4.542631 |
| C  | 1.329250 | -3.714133 | -3.427596 |
| H  | 1.369613 | -4.523337 | -4.169575 |
| H  | 0.296191 | -3.694470 | -3.040922 |
| C  | 2.278014 | -3.994111 | -2.269077 |
| H  | 3.303091 | -4.118448 | -2.656804 |
| H  | 2.016317 | -4.939947 | -1.775644 |
| C  | 2.254406 | -2.853945 | -1.258918 |
| H  | 2.934422 | -3.063852 | -0.419661 |
| H  | 1.245853 | -2.773334 | -0.814073 |
| C  | 4.044962 | -0.579913 | 0.439900  |
| H  | 3.641151 | -1.340277 | 1.132513  |
| C  | 5.275589 | -1.191141 | -0.235914 |
| H  | 5.725439 | -0.468922 | -0.936035 |
| H  | 4.999781 | -2.071266 | -0.833100 |
| C  | 6.307515 | -1.597576 | 0.813970  |
| H  | 5.874821 | -2.394096 | 1.441512  |
| H  | 7.192441 | -2.030210 | 0.327152  |
| C  | 6.701424 | -0.423578 | 1.702166  |
| H  | 7.214305 | 0.336367  | 1.088876  |
| H  | 7.425002 | -0.744882 | 2.463479  |
| C  | 5.475966 | 0.203244  | 2.356659  |
| H  | 5.764255 | 1.070239  | 2.967036  |
| H  | 5.008565 | -0.521320 | 3.042400  |
| C  | 4.446412 | 0.615228  | 1.311265  |
| H  | 3.556888 | 1.043791  | 1.794726  |
| H  | 4.875576 | 1.407073  | 0.674172  |
| C  | 2.846745 | 1.378560  | -1.547243 |

S-108

|    |           |           |           |
|----|-----------|-----------|-----------|
| H  | 2.073988  | 1.315346  | -2.334188 |
| C  | 2.504116  | 2.637867  | -0.741067 |
| H  | 1.503194  | 2.528386  | -0.292341 |
| H  | 3.208594  | 2.755411  | 0.096472  |
| C  | 2.565443  | 3.876968  | -1.628307 |
| H  | 2.343405  | 4.775715  | -1.036909 |
| H  | 1.771178  | 3.807599  | -2.391247 |
| C  | 3.916389  | 4.007372  | -2.322398 |
| H  | 3.935292  | 4.895817  | -2.968101 |
| H  | 4.700524  | 4.160463  | -1.562602 |
| C  | 4.242849  | 2.755312  | -3.127816 |
| H  | 5.225096  | 2.848339  | -3.610934 |
| H  | 3.505757  | 2.644660  | -3.940732 |
| C  | 4.200713  | 1.509674  | -2.247587 |
| H  | 4.998642  | 1.577448  | -1.490766 |
| H  | 4.417026  | 0.609966  | -2.843347 |
| Al | -1.831684 | 0.174038  | 0.602351  |
| N  | -3.373566 | -0.866335 | 0.103349  |
| N  | -2.813040 | 1.833281  | 0.573721  |
| C  | -4.642364 | -0.480026 | 0.282629  |
| C  | -4.995860 | 0.836231  | 0.613777  |
| H  | -6.055144 | 1.032325  | 0.749167  |
| C  | -4.140251 | 1.946596  | 0.672934  |
| C  | -5.745045 | -1.478914 | 0.098910  |
| H  | -5.661206 | -1.983143 | -0.871347 |
| H  | -6.728312 | -1.006865 | 0.169064  |
| H  | -5.684960 | -2.268097 | 0.859361  |
| C  | -4.749821 | 3.305103  | 0.850580  |
| H  | -5.841605 | 3.257579  | 0.860914  |
| H  | -4.432585 | 3.991632  | 0.056622  |
| H  | -4.411056 | 3.756877  | 1.792644  |
| C  | -3.082239 | -2.206154 | -0.328887 |
| C  | -2.753407 | -2.416137 | -1.687522 |
| C  | -2.406755 | -3.711717 | -2.078562 |
| H  | -2.161455 | -3.910066 | -3.119539 |
| C  | -2.347768 | -4.754815 | -1.160347 |
| H  | -2.059796 | -5.752041 | -1.489243 |
| C  | -2.647097 | -4.518880 | 0.172656  |
| H  | -2.583606 | -5.333464 | 0.893999  |
| C  | -3.026713 | -3.248356 | 0.615870  |
| C  | -2.741967 | -1.268625 | -2.687108 |
| H  | -2.175542 | -0.445139 | -2.216815 |
| C  | -2.026371 | -1.615974 | -3.987389 |
| H  | -1.037659 | -2.052236 | -3.811693 |
| H  | -1.890628 | -0.714241 | -4.596429 |
| H  | -2.605281 | -2.328730 | -4.590397 |
| C  | -4.137360 | -0.733852 | -3.021968 |
| H  | -4.789909 | -1.540867 | -3.382427 |
| H  | -4.069743 | 0.014255  | -3.822754 |
| H  | -4.628366 | -0.248981 | -2.171949 |
| C  | -3.319846 | -3.036912 | 2.089107  |
| H  | -3.753981 | -2.034635 | 2.215783  |
| C  | -2.030837 | -3.084250 | 2.909704  |
| H  | -2.239512 | -2.912982 | 3.973338  |
| H  | -1.306635 | -2.328943 | 2.578892  |
| H  | -1.545820 | -4.065836 | 2.819526  |
| C  | -4.332430 | -4.049927 | 2.622468  |
| H  | -5.257093 | -4.069623 | 2.030926  |
| H  | -4.599356 | -3.815824 | 3.659935  |

|   |           |           |           |
|---|-----------|-----------|-----------|
| H | -3.922480 | -5.067911 | 2.617304  |
| C | -2.008015 | 3.012112  | 0.411740  |
| C | -1.526661 | 3.704789  | 1.537287  |
| C | -0.722070 | 4.827307  | 1.324357  |
| H | -0.336643 | 5.374666  | 2.184248  |
| C | -0.406212 | 5.253647  | 0.041092  |
| H | 0.212652  | 6.137780  | -0.104470 |
| C | -0.870355 | 4.540637  | -1.057538 |
| H | -0.605795 | 4.868858  | -2.063076 |
| C | -1.662399 | 3.401625  | -0.898695 |
| C | -1.805137 | 3.230694  | 2.948803  |
| H | -2.619505 | 2.492567  | 2.905678  |
| C | -0.571844 | 2.520065  | 3.508879  |
| H | 0.279476  | 3.212392  | 3.569905  |
| H | -0.272829 | 1.677177  | 2.869658  |
| H | -0.761725 | 2.128569  | 4.516412  |
| C | -2.253172 | 4.360272  | 3.872671  |
| H | -1.451508 | 5.091370  | 4.037521  |
| H | -2.532293 | 3.963732  | 4.856060  |
| H | -3.116116 | 4.906373  | 3.470168  |
| C | -2.141354 | 2.640994  | -2.121235 |
| H | -2.562784 | 1.683680  | -1.781070 |
| C | -0.996206 | 2.312956  | -3.076392 |
| H | -0.550493 | 3.217894  | -3.511164 |
| H | -1.356997 | 1.696291  | -3.910610 |
| H | -0.204536 | 1.754505  | -2.559073 |
| C | -3.256189 | 3.398635  | -2.842604 |
| H | -4.130588 | 3.550275  | -2.196996 |
| H | -3.591759 | 2.850636  | -3.732111 |
| H | -2.911982 | 4.388301  | -3.171790 |
| C | 1.286440  | -1.084710 | 2.279370  |
| C | 1.430371  | -2.484776 | 2.343824  |
| C | 1.846911  | -0.357068 | 3.343888  |
| C | 2.103122  | -3.117645 | 3.390282  |
| H | 0.999696  | -3.105777 | 1.552871  |
| C | 2.520093  | -0.979620 | 4.397653  |
| H | 1.771569  | 0.733091  | 3.352396  |
| C | 2.658761  | -2.366013 | 4.424656  |
| H | 2.191849  | -4.205444 | 3.398141  |
| H | 2.944855  | -0.374207 | 5.200545  |
| H | 3.187336  | -2.854152 | 5.242739  |
| H | -0.542022 | 0.402161  | -0.706569 |

Int-5a\_p2-PdAl2.log

SCF (wB97x) = -2842.72037050

H(0 K)= -2841.342235

H(298 K)= -2841.262651

G(298 K)= -2841.459776

Lowest Frequency = 11.1117cm<sup>-1</sup>

|    |           |           |          |
|----|-----------|-----------|----------|
| Pd | -0.209762 | -0.095799 | 0.387343 |
| Al | 2.410558  | 0.288088  | 0.394544 |
| N  | 3.560921  | 1.784636  | 0.033208 |
| N  | 3.738351  | -0.680374 | 1.405580 |
| C  | 4.544907  | 2.127069  | 0.877076 |
| C  | 5.035994  | 1.276977  | 1.877628 |
| H  | 5.826839  | 1.679260  | 2.503964 |
| C  | 4.719351  | -0.079935 | 2.071553 |

**S-110**

|   |           |           |           |
|---|-----------|-----------|-----------|
| C | 5.185036  | 3.477028  | 0.737318  |
| H | 5.562077  | 3.634027  | -0.280708 |
| H | 6.011205  | 3.601709  | 1.441757  |
| H | 4.450348  | 4.273212  | 0.914817  |
| C | 5.519365  | -0.844959 | 3.083814  |
| H | 5.018516  | -0.796757 | 4.060552  |
| H | 6.520239  | -0.421181 | 3.206679  |
| H | 5.606108  | -1.904691 | 2.823357  |
| C | 3.244386  | 2.670199  | -1.051828 |
| C | 3.806217  | 2.407627  | -2.320576 |
| C | 3.501516  | 3.283214  | -3.364494 |
| H | 3.921707  | 3.104867  | -4.352298 |
| C | 2.645276  | 4.363089  | -3.173549 |
| H | 2.417434  | 5.029808  | -4.003693 |
| C | 2.061151  | 4.570533  | -1.932655 |
| H | 1.360397  | 5.394388  | -1.794884 |
| C | 2.347371  | 3.734278  | -0.848948 |
| C | 4.654972  | 1.169421  | -2.555143 |
| H | 4.187477  | 0.359053  | -1.972515 |
| C | 4.657125  | 0.718351  | -4.011193 |
| H | 3.639248  | 0.618102  | -4.407040 |
| H | 5.147123  | -0.258073 | -4.101393 |
| H | 5.208444  | 1.414241  | -4.657764 |
| C | 6.091884  | 1.319474  | -2.052008 |
| H | 6.582921  | 2.188655  | -2.511165 |
| H | 6.680410  | 0.430649  | -2.315447 |
| H | 6.146313  | 1.431009  | -0.962700 |
| C | 1.631045  | 3.946981  | 0.469431  |
| H | 2.083995  | 3.286677  | 1.222797  |
| C | 0.162491  | 3.550431  | 0.327461  |
| H | -0.363308 | 3.616789  | 1.289178  |
| H | 0.041818  | 2.516698  | -0.034937 |
| H | -0.349931 | 4.219856  | -0.376992 |
| C | 1.740456  | 5.383900  | 0.975998  |
| H | 2.781891  | 5.716867  | 1.075473  |
| H | 1.260005  | 5.479749  | 1.957396  |
| H | 1.235416  | 6.087028  | 0.300437  |
| C | 3.503713  | -2.090109 | 1.489875  |
| C | 2.683073  | -2.612726 | 2.506898  |
| C | 2.352488  | -3.970466 | 2.446508  |
| H | 1.707882  | -4.392105 | 3.218881  |
| C | 2.821737  | -4.782099 | 1.422177  |
| H | 2.547611  | -5.835665 | 1.392744  |
| C | 3.637875  | -4.247093 | 0.430646  |
| H | 3.994968  | -4.887134 | -0.375017 |
| C | 3.982916  | -2.895458 | 0.434584  |
| C | 2.160554  | -1.765832 | 3.650489  |
| H | 2.531292  | -0.739724 | 3.513969  |
| C | 0.635008  | -1.699837 | 3.662165  |
| H | 0.199576  | -2.693672 | 3.835013  |
| H | 0.232447  | -1.311023 | 2.712656  |
| H | 0.286688  | -1.039381 | 4.466618  |
| C | 2.674248  | -2.288604 | 4.993505  |
| H | 2.263750  | -3.284034 | 5.209625  |
| H | 2.369076  | -1.624990 | 5.812106  |
| H | 3.767524  | -2.378441 | 5.016062  |
| C | 4.856999  | -2.303858 | -0.653673 |
| H | 4.615059  | -1.232705 | -0.716896 |
| C | 4.600217  | -2.900506 | -2.031856 |

|    |           |           |           |
|----|-----------|-----------|-----------|
| H  | 4.898150  | -3.955828 | -2.090165 |
| H  | 5.188371  | -2.363037 | -2.786771 |
| H  | 3.541439  | -2.826216 | -2.310176 |
| C  | 6.335706  | -2.408377 | -0.276259 |
| H  | 6.557432  | -1.871273 | 0.654812  |
| H  | 6.972115  | -1.984172 | -1.063353 |
| H  | 6.631897  | -3.456702 | -0.134431 |
| Al | -2.553074 | -0.191838 | 0.384907  |
| N  | -3.901975 | -1.535903 | -0.124409 |
| N  | -3.982475 | 1.088391  | 0.846235  |
| C  | -5.200541 | -1.537711 | 0.196730  |
| C  | -5.825545 | -0.456354 | 0.828289  |
| H  | -6.878104 | -0.576725 | 1.066909  |
| C  | -5.273055 | 0.810391  | 1.062313  |
| C  | -6.050079 | -2.722717 | -0.160289 |
| H  | -6.118417 | -2.843105 | -1.248947 |
| H  | -7.062234 | -2.623751 | 0.240903  |
| H  | -5.607068 | -3.653029 | 0.216607  |
| C  | -6.198670 | 1.885482  | 1.556134  |
| H  | -5.914864 | 2.218877  | 2.562568  |
| H  | -7.233048 | 1.533179  | 1.589806  |
| H  | -6.148152 | 2.775754  | 0.917054  |
| C  | -3.426996 | -2.581317 | -0.989580 |
| C  | -3.510208 | -2.382273 | -2.382395 |
| C  | -3.060876 | -3.399535 | -3.226818 |
| H  | -3.116417 | -3.254737 | -4.306543 |
| C  | -2.540316 | -4.581831 | -2.716668 |
| H  | -2.199003 | -5.366481 | -3.390406 |
| C  | -2.438613 | -4.747455 | -1.341780 |
| H  | -2.004832 | -5.663684 | -0.939136 |
| C  | -2.866805 | -3.755688 | -0.455378 |
| C  | -4.032341 | -1.092523 | -2.986502 |
| H  | -4.428722 | -0.464183 | -2.175312 |
| C  | -2.892356 | -0.320046 | -3.650238 |
| H  | -2.446022 | -0.901905 | -4.468601 |
| H  | -2.087278 | -0.092039 | -2.936977 |
| H  | -3.259450 | 0.624581  | -4.074696 |
| C  | -5.171984 | -1.335330 | -3.973737 |
| H  | -5.565970 | -0.383695 | -4.352044 |
| H  | -6.003858 | -1.883185 | -3.513617 |
| H  | -4.836465 | -1.916589 | -4.842561 |
| C  | -2.680911 | -3.964134 | 1.033108  |
| H  | -3.155447 | -3.122588 | 1.558316  |
| C  | -3.340309 | -5.252556 | 1.521839  |
| H  | -4.409891 | -5.288159 | 1.278155  |
| H  | -3.240518 | -5.350202 | 2.609830  |
| H  | -2.873509 | -6.138316 | 1.071330  |
| C  | -1.193062 | -3.949139 | 1.384807  |
| H  | -1.045237 | -4.105147 | 2.461525  |
| H  | -0.729638 | -2.989294 | 1.111381  |
| H  | -0.652331 | -4.746587 | 0.854455  |
| C  | -3.559024 | 2.453287  | 0.999213  |
| C  | -3.300293 | 2.980836  | 2.278247  |
| C  | -2.973980 | 4.335826  | 2.379938  |
| H  | -2.772626 | 4.760763  | 3.363300  |
| C  | -2.897474 | 5.144197  | 1.254012  |
| H  | -2.653265 | 6.200866  | 1.353916  |
| C  | -3.089779 | 4.589887  | -0.005657 |
| H  | -2.976894 | 5.217567  | -0.888275 |



|   |           |           |           |
|---|-----------|-----------|-----------|
| C | -3.395419 | 3.236339  | -0.162784 |
| C | -3.292135 | 2.110969  | 3.519446  |
| H | -3.792696 | 1.162354  | 3.277950  |
| C | -1.847405 | 1.782763  | 3.905741  |
| H | -1.300081 | 2.701003  | 4.161884  |
| H | -1.310316 | 1.291999  | 3.081071  |
| H | -1.818674 | 1.119322  | 4.780188  |
| C | -4.032983 | 2.741031  | 4.696442  |
| H | -4.083948 | 2.039527  | 5.537786  |
| H | -5.059611 | 3.030503  | 4.436792  |
| H | -3.522870 | 3.641950  | 5.060863  |
| C | -3.547829 | 2.628023  | -1.545448 |
| H | -3.197576 | 1.582836  | -1.480757 |
| C | -2.674029 | 3.306430  | -2.593986 |
| H | -3.002184 | 4.332036  | -2.808126 |
| H | -2.721294 | 2.753100  | -3.539176 |
| H | -1.622602 | 3.340195  | -2.280935 |
| C | -5.008160 | 2.585324  | -1.995247 |
| H | -5.439074 | 3.595640  | -2.024735 |
| H | -5.626515 | 1.973857  | -1.325839 |
| H | -5.091682 | 2.157557  | -3.003587 |
| H | 1.231704  | 0.710424  | 1.456587  |
| C | 1.672793  | -0.690984 | -1.168803 |
| C | 1.440066  | -0.131431 | -2.447468 |
| C | 1.143834  | -1.992601 | -0.965946 |
| C | 0.813144  | -0.840958 | -3.468566 |
| H | 1.763517  | 0.891081  | -2.656093 |
| C | 0.505635  | -2.707550 | -1.983748 |
| H | 1.275865  | -2.489237 | -0.001840 |
| C | 0.353414  | -2.139563 | -3.243770 |
| H | 0.672898  | -0.374756 | -4.444830 |
| H | 0.119958  | -3.706909 | -1.780979 |
| H | -0.144206 | -2.695069 | -4.039013 |

Int-5b\_p2-PPdAl.log

SCF (wB97x) = -2648.57641049

H(0 K)= -2647.349855

H(298 K)= -2647.286651

G(298 K)= -2647.446796

Lowest Frequency = 19.9540cm<sup>-1</sup>

|    |          |           |           |
|----|----------|-----------|-----------|
| Pd | 1.061310 | -0.135657 | -1.175997 |
| P  | 3.092702 | -0.249294 | -0.059217 |
| C  | 4.439597 | -0.763953 | -1.234789 |
| H  | 5.405682 | -0.796170 | -0.699778 |
| C  | 4.560984 | 0.224893  | -2.399788 |
| H  | 3.571322 | 0.313970  | -2.883502 |
| H  | 4.813660 | 1.230434  | -2.034738 |
| C  | 5.597602 | -0.228554 | -3.422489 |
| H  | 5.648611 | 0.492060  | -4.249792 |
| H  | 6.594244 | -0.228500 | -2.951198 |
| C  | 5.291191 | -1.626003 | -3.945754 |
| H  | 6.061951 | -1.949383 | -4.658129 |
| H  | 4.341347 | -1.602108 | -4.503692 |
| C  | 5.169243 | -2.620493 | -2.798312 |
| H  | 6.146707 | -2.721206 | -2.297870 |
| H  | 4.912751 | -3.619213 | -3.176577 |
| C  | 4.130967 | -2.164748 | -1.779666 |

S-113

|    |           |           |           |
|----|-----------|-----------|-----------|
| H  | 4.058313  | -2.896220 | -0.961770 |
| H  | 3.131389  | -2.134940 | -2.251435 |
| C  | 3.184422  | -1.548372 | 1.274729  |
| H  | 2.679311  | -2.398435 | 0.782541  |
| C  | 4.558757  | -2.055289 | 1.725383  |
| H  | 5.101824  | -1.260415 | 2.256571  |
| H  | 5.182626  | -2.331911 | 0.863805  |
| C  | 4.394123  | -3.256043 | 2.655124  |
| H  | 3.923465  | -4.079802 | 2.092442  |
| H  | 5.377961  | -3.624069 | 2.977040  |
| C  | 3.527081  | -2.911801 | 3.860833  |
| H  | 4.045149  | -2.150570 | 4.467516  |
| H  | 3.404510  | -3.790084 | 4.509029  |
| C  | 2.170430  | -2.366773 | 3.430389  |
| H  | 1.571670  | -2.074078 | 4.303226  |
| H  | 1.599508  | -3.159877 | 2.919063  |
| C  | 2.319379  | -1.180980 | 2.484096  |
| H  | 1.332664  | -0.823608 | 2.154424  |
| H  | 2.788321  | -0.343405 | 3.028570  |
| C  | 3.704839  | 1.374252  | 0.622758  |
| H  | 3.962369  | 1.935192  | -0.294524 |
| C  | 2.577703  | 2.157156  | 1.302492  |
| H  | 1.706997  | 2.199456  | 0.632644  |
| H  | 2.238044  | 1.615822  | 2.199161  |
| C  | 3.024183  | 3.560222  | 1.693971  |
| H  | 2.205138  | 4.081583  | 2.210492  |
| H  | 3.231678  | 4.141042  | 0.779365  |
| C  | 4.277905  | 3.528756  | 2.560529  |
| H  | 4.606342  | 4.547624  | 2.806198  |
| H  | 4.041977  | 3.039228  | 3.519799  |
| C  | 5.398663  | 2.756767  | 1.873289  |
| H  | 6.291287  | 2.718544  | 2.512440  |
| H  | 5.697304  | 3.288366  | 0.954856  |
| C  | 4.950390  | 1.343296  | 1.509809  |
| H  | 4.715638  | 0.799597  | 2.438999  |
| H  | 5.768103  | 0.790717  | 1.023406  |
| Al | -1.368766 | 0.005059  | -0.520089 |
| N  | -2.739213 | -1.220355 | -1.119111 |
| N  | -2.327831 | 1.602980  | -1.117243 |
| C  | -3.360729 | -0.952653 | -2.277975 |
| C  | -3.404892 | 0.326694  | -2.843663 |
| H  | -3.923715 | 0.411068  | -3.794936 |
| C  | -3.044157 | 1.547628  | -2.233767 |
| C  | -4.070821 | -2.062425 | -2.997687 |
| H  | -3.392356 | -2.910052 | -3.159250 |
| H  | -4.456648 | -1.728479 | -3.964268 |
| H  | -4.907984 | -2.455241 | -2.408672 |
| C  | -3.522453 | 2.801446  | -2.907357 |
| H  | -2.892298 | 3.019554  | -3.779620 |
| H  | -3.481799 | 3.669056  | -2.242035 |
| H  | -4.547091 | 2.681824  | -3.274249 |
| C  | -3.051198 | -2.444005 | -0.446228 |
| C  | -2.163202 | -3.535360 | -0.504446 |
| C  | -2.496432 | -4.701506 | 0.190753  |
| H  | -1.812622 | -5.550162 | 0.155451  |
| C  | -3.673937 | -4.796898 | 0.920175  |
| H  | -3.918705 | -5.716679 | 1.448795  |
| C  | -4.530848 | -3.704969 | 0.982053  |
| H  | -5.445645 | -3.769785 | 1.572471  |

|   |           |           |           |
|---|-----------|-----------|-----------|
| C | -4.236418 | -2.513038 | 0.317334  |
| C | -0.843920 | -3.466735 | -1.245616 |
| H | -0.803098 | -2.519637 | -1.803485 |
| C | 0.319967  | -3.457301 | -0.252843 |
| H | 0.242534  | -2.616227 | 0.452295  |
| H | 1.276231  | -3.348117 | -0.783684 |
| H | 0.351343  | -4.389536 | 0.330959  |
| C | -0.680352 | -4.602023 | -2.253108 |
| H | -0.642423 | -5.581925 | -1.758732 |
| H | 0.255123  | -4.482295 | -2.813795 |
| H | -1.504936 | -4.630804 | -2.976030 |
| C | -5.164739 | -1.324972 | 0.487909  |
| H | -4.738008 | -0.472498 | -0.059095 |
| C | -5.257404 | -0.926168 | 1.960472  |
| H | -5.903394 | -0.046580 | 2.082375  |
| H | -4.270540 | -0.686936 | 2.377302  |
| H | -5.688611 | -1.734229 | 2.566484  |
| C | -6.559524 | -1.594614 | -0.074462 |
| H | -6.536108 | -1.841414 | -1.142826 |
| H | -7.203721 | -0.714595 | 0.048484  |
| H | -7.043305 | -2.431959 | 0.446358  |
| C | -1.989969 | 2.836519  | -0.473868 |
| C | -2.647487 | 3.150852  | 0.737162  |
| C | -2.210642 | 4.263651  | 1.456552  |
| H | -2.695972 | 4.516777  | 2.396848  |
| C | -1.145859 | 5.038388  | 1.009043  |
| H | -0.808251 | 5.892536  | 1.594144  |
| C | -0.519982 | 4.722329  | -0.187515 |
| H | 0.305327  | 5.339832  | -0.544197 |
| C | -0.926620 | 3.627300  | -0.958661 |
| C | -3.797730 | 2.295672  | 1.234559  |
| H | -3.540750 | 1.247117  | 1.014670  |
| C | -4.020556 | 2.397736  | 2.737695  |
| H | -4.371705 | 3.394906  | 3.035167  |
| H | -3.102123 | 2.175141  | 3.295240  |
| H | -4.787450 | 1.682783  | 3.055951  |
| C | -5.087063 | 2.616575  | 0.475909  |
| H | -5.379015 | 3.665222  | 0.623599  |
| H | -5.913908 | 1.986440  | 0.831013  |
| H | -4.982058 | 2.446868  | -0.602728 |
| C | -0.244641 | 3.391420  | -2.295011 |
| H | -0.662122 | 2.479085  | -2.745596 |
| C | 1.261498  | 3.173254  | -2.159625 |
| H | 1.751817  | 4.026966  | -1.670479 |
| H | 1.720084  | 3.048810  | -3.149635 |
| H | 1.477152  | 2.262112  | -1.578733 |
| C | -0.505649 | 4.571471  | -3.236233 |
| H | -1.571394 | 4.812478  | -3.323630 |
| H | -0.119053 | 4.360390  | -4.241210 |
| H | 0.001086  | 5.476003  | -2.874053 |
| C | -1.172575 | -0.002075 | 1.466577  |
| C | -1.512251 | -1.078316 | 2.310091  |
| C | -0.587150 | 1.113487  | 2.098709  |
| C | -1.293642 | -1.039839 | 3.688325  |
| H | -1.959857 | -1.982269 | 1.891442  |
| C | -0.370056 | 1.168646  | 3.473992  |
| H | -0.277080 | 1.971426  | 1.499960  |
| C | -0.722957 | 0.085764  | 4.277849  |
| H | -1.568707 | -1.896635 | 4.303933  |

|   |           |           |           |
|---|-----------|-----------|-----------|
| H | 0.081058  | 2.059434  | 3.915314  |
| H | -0.551346 | 0.116874  | 5.353502  |
| H | -0.421787 | -0.100417 | -2.007845 |

PdbisPCy3.log

SCF (wB97x) = -2222.15623622

H(0 K)= -2221.181895

H(298 K)= -2221.139520

G(298 K)= -2221.260694

Lowest Frequency = 2.4842cm<sup>-1</sup>

|    |           |           |           |
|----|-----------|-----------|-----------|
| Pd | 0.417559  | 1.170198  | 1.627974  |
| P  | 2.665904  | 1.666765  | 1.815197  |
| P  | -1.822995 | 0.718995  | 1.301188  |
| C  | -2.490424 | 1.635913  | -0.182684 |
| C  | -3.823454 | 1.220297  | -0.814311 |
| C  | -2.454439 | 3.141769  | 0.112877  |
| H  | -1.706879 | 1.447593  | -0.938402 |
| C  | -4.134794 | 2.068491  | -2.046069 |
| H  | -4.643630 | 1.317563  | -0.088249 |
| H  | -3.794046 | 0.161173  | -1.101794 |
| C  | -2.780497 | 3.967549  | -1.125723 |
| H  | -3.185643 | 3.379860  | 0.903574  |
| H  | -1.464972 | 3.408918  | 0.516278  |
| C  | -4.119989 | 3.557318  | -1.724784 |
| H  | -5.103102 | 1.771614  | -2.471488 |
| H  | -3.379712 | 1.861719  | -2.822311 |
| H  | -2.776291 | 5.037864  | -0.878864 |
| H  | -1.987111 | 3.818779  | -1.876171 |
| H  | -4.340058 | 4.147751  | -2.624359 |
| H  | -4.923398 | 3.780778  | -1.003164 |
| C  | -2.865778 | 1.212982  | 2.769147  |
| C  | -4.386161 | 1.344966  | 2.628165  |
| C  | -2.485367 | 0.323634  | 3.961353  |
| H  | -2.478180 | 2.222187  | 2.996657  |
| C  | -5.021623 | 1.808333  | 3.937613  |
| H  | -4.832287 | 0.386441  | 2.325577  |
| H  | -4.631665 | 2.060798  | 1.832829  |
| C  | -3.142149 | 0.797114  | 5.252369  |
| H  | -2.798662 | -0.714847 | 3.762107  |
| H  | -1.388992 | 0.301126  | 4.062489  |
| C  | -4.654837 | 0.892562  | 5.098057  |
| H  | -6.112161 | 1.874084  | 3.822889  |
| H  | -4.672540 | 2.829542  | 4.162713  |
| H  | -2.876933 | 0.125192  | 6.079815  |
| H  | -2.741867 | 1.789038  | 5.517465  |
| H  | -5.118540 | 1.245436  | 6.029011  |
| H  | -5.064466 | -0.113831 | 4.909587  |
| C  | -2.121080 | -1.100117 | 1.000043  |
| C  | -3.535268 | -1.679994 | 1.113193  |
| C  | -1.455817 | -1.493289 | -0.326581 |
| H  | -1.520096 | -1.567569 | 1.800596  |
| C  | -3.530881 | -3.189425 | 0.879412  |
| H  | -4.209641 | -1.201061 | 0.388535  |
| H  | -3.953485 | -1.467672 | 2.105705  |
| C  | -1.476289 | -3.001385 | -0.544590 |
| H  | -1.983437 | -1.005151 | -1.162993 |
| H  | -0.424769 | -1.105722 | -0.344730 |

|   |           |           |           |
|---|-----------|-----------|-----------|
| C | -2.894486 | -3.551431 | -0.456055 |
| H | -4.554963 | -3.581965 | 0.941988  |
| H | -2.963634 | -3.675312 | 1.690306  |
| H | -1.022411 | -3.249419 | -1.513616 |
| H | -0.851727 | -3.485062 | 0.223908  |
| H | -2.898548 | -4.639870 | -0.602718 |
| H | -3.500105 | -3.126135 | -1.273678 |
| C | 2.988061  | 3.505643  | 1.798235  |
| C | 4.342048  | 4.038597  | 2.276788  |
| C | 2.606554  | 4.084094  | 0.430712  |
| H | 2.233007  | 3.873440  | 2.515826  |
| C | 4.360870  | 5.565968  | 2.266972  |
| H | 5.153390  | 3.663200  | 1.635039  |
| H | 4.557850  | 3.673642  | 3.290979  |
| C | 2.642387  | 5.607611  | 0.437466  |
| H | 3.308090  | 3.713654  | -0.335544 |
| H | 1.609938  | 3.713169  | 0.143175  |
| C | 4.001107  | 6.123640  | 0.895055  |
| H | 5.344609  | 5.932931  | 2.589919  |
| H | 3.633794  | 5.937565  | 3.007441  |
| H | 2.394568  | 5.997562  | -0.559035 |
| H | 1.863152  | 5.983080  | 1.120406  |
| H | 4.013777  | 7.221724  | 0.911054  |
| H | 4.769302  | 5.815649  | 0.166286  |
| C | 3.571045  | 0.961346  | 0.339981  |
| C | 5.006848  | 1.385360  | 0.013816  |
| C | 3.439354  | -0.567467 | 0.338554  |
| H | 2.936018  | 1.327167  | -0.487744 |
| C | 5.459148  | 0.780865  | -1.314277 |
| H | 5.693029  | 1.061179  | 0.808916  |
| H | 5.084874  | 2.479325  | -0.036429 |
| C | 3.909863  | -1.166885 | -0.981485 |
| H | 4.042881  | -0.987887 | 1.160937  |
| H | 2.393798  | -0.844618 | 0.547664  |
| C | 5.334808  | -0.737582 | -1.309779 |
| H | 6.491648  | 1.084731  | -1.534461 |
| H | 4.835715  | 1.192142  | -2.125356 |
| H | 3.832603  | -2.262204 | -0.949935 |
| H | 3.234878  | -0.831379 | -1.785791 |
| H | 5.652157  | -1.153457 | -2.275547 |
| H | 6.020879  | -1.153163 | -0.553216 |
| C | 3.496207  | 1.079804  | 3.383432  |
| C | 2.781836  | -0.158290 | 3.943111  |
| C | 5.009547  | 0.842228  | 3.364610  |
| H | 3.295951  | 1.910210  | 4.087347  |
| C | 3.303579  | -0.525525 | 5.327559  |
| H | 2.936016  | -1.005171 | 3.253273  |
| H | 1.696014  | 0.018499  | 3.957954  |
| C | 5.527772  | 0.493344  | 4.757379  |
| H | 5.231923  | 0.004444  | 2.683785  |
| H | 5.545683  | 1.712543  | 2.965829  |
| C | 4.814172  | -0.727985 | 5.323598  |
| H | 2.794427  | -1.425383 | 5.698519  |
| H | 3.050310  | 0.284467  | 6.031378  |
| H | 6.613473  | 0.328143  | 4.726876  |
| H | 5.364533  | 1.354644  | 5.426494  |
| H | 5.178251  | -0.953799 | 6.334969  |
| H | 5.059487  | -1.605516 | 4.703109  |

TS-1a-toluene\_meta1.log

SCF (wB97x) = -2881.98773384

H(0 K)= -2880.582500

H(298 K)= -2880.502244

G(298 K)= -2880.695362

Lowest Frequency = -706.9746cm<sup>-1</sup>

|    |           |           |           |
|----|-----------|-----------|-----------|
| Pd | -0.049122 | -0.055924 | 1.254277  |
| Al | -1.757422 | -0.085864 | -0.480994 |
| N  | -2.937092 | 1.471351  | -0.739079 |
| N  | -2.367581 | -0.876520 | -2.186454 |
| C  | -3.567552 | 1.832506  | -1.860421 |
| C  | -3.619205 | 1.013301  | -2.997304 |
| H  | -4.193776 | 1.391977  | -3.837620 |
| C  | -3.162281 | -0.304449 | -3.102344 |
| C  | -4.314622 | 3.133662  | -1.916334 |
| H  | -5.034596 | 3.211048  | -1.092070 |
| H  | -4.848611 | 3.244558  | -2.863878 |
| H  | -3.630280 | 3.983965  | -1.802753 |
| C  | -3.677509 | -1.108250 | -4.264002 |
| H  | -2.933297 | -1.799522 | -4.671244 |
| H  | -4.038024 | -0.453940 | -5.063105 |
| H  | -4.525103 | -1.727428 | -3.937481 |
| C  | -3.147794 | 2.276503  | 0.437504  |
| C  | -4.069009 | 1.810704  | 1.399454  |
| C  | -4.346808 | 2.632257  | 2.492948  |
| H  | -5.061795 | 2.298300  | 3.242154  |
| C  | -3.713223 | 3.858338  | 2.654802  |
| H  | -3.948824 | 4.482516  | 3.515660  |
| C  | -2.752269 | 4.262242  | 1.739022  |
| H  | -2.218460 | 5.200068  | 1.892998  |
| C  | -2.446914 | 3.482073  | 0.620767  |
| C  | -4.736883 | 0.455160  | 1.259462  |
| H  | -3.993260 | -0.223782 | 0.802493  |
| C  | -5.114366 | -0.161124 | 2.600864  |
| H  | -4.265237 | -0.166237 | 3.295463  |
| H  | -5.444135 | -1.197669 | 2.461450  |
| H  | -5.946642 | 0.374339  | 3.077629  |
| C  | -5.943722 | 0.500211  | 0.321631  |
| H  | -6.703892 | 1.198453  | 0.698414  |
| H  | -6.412193 | -0.490950 | 0.246247  |
| H  | -5.671394 | 0.814456  | -0.693988 |
| C  | -1.319772 | 3.899315  | -0.298353 |
| H  | -1.381054 | 3.291830  | -1.211311 |
| C  | 0.017646  | 3.586072  | 0.373143  |
| H  | 0.855883  | 3.827073  | -0.292746 |
| H  | 0.090945  | 2.521920  | 0.649509  |
| H  | 0.134401  | 4.175210  | 1.294446  |
| C  | -1.376958 | 5.366475  | -0.715005 |
| H  | -2.339388 | 5.637832  | -1.168856 |
| H  | -0.584940 | 5.582757  | -1.443879 |
| H  | -1.218302 | 6.037711  | 0.138947  |
| C  | -2.087335 | -2.276595 | -2.344719 |
| C  | -0.872308 | -2.679545 | -2.935071 |
| C  | -0.669392 | -4.045215 | -3.150758 |
| H  | 0.249971  | -4.377318 | -3.631662 |
| C  | -1.616213 | -4.987358 | -2.765982 |
| H  | -1.435696 | -6.046151 | -2.944191 |

|    |           |           |           |
|----|-----------|-----------|-----------|
| C  | -2.780987 | -4.574135 | -2.132875 |
| H  | -3.505336 | -5.316836 | -1.799086 |
| C  | -3.038741 | -3.219718 | -1.906999 |
| C  | 0.156540  | -1.665411 | -3.398779 |
| H  | 0.030276  | -0.761586 | -2.780993 |
| C  | 1.597843  | -2.130103 | -3.220601 |
| H  | 1.837323  | -3.009610 | -3.833174 |
| H  | 1.824765  | -2.380908 | -2.176887 |
| H  | 2.291656  | -1.335648 | -3.526965 |
| C  | -0.083171 | -1.271315 | -4.856772 |
| H  | -0.063587 | -2.155206 | -5.509196 |
| H  | 0.700022  | -0.584899 | -5.204192 |
| H  | -1.048753 | -0.771514 | -4.998895 |
| C  | -4.285629 | -2.809664 | -1.146615 |
| H  | -4.431604 | -1.726080 | -1.273154 |
| C  | -4.091697 | -3.074542 | 0.348799  |
| H  | -3.908544 | -4.141762 | 0.535301  |
| H  | -4.985470 | -2.781617 | 0.915289  |
| H  | -3.235201 | -2.518340 | 0.757721  |
| C  | -5.546612 | -3.504264 | -1.654628 |
| H  | -5.684706 | -3.371065 | -2.735059 |
| H  | -6.434266 | -3.104662 | -1.149487 |
| H  | -5.524104 | -4.583730 | -1.457686 |
| Al | 1.970616  | -0.029904 | -0.053899 |
| N  | 3.214124  | -1.547964 | 0.184120  |
| N  | 3.167556  | 0.821454  | -1.355714 |
| C  | 4.257135  | -1.850561 | -0.587546 |
| C  | 4.630870  | -1.066490 | -1.693254 |
| H  | 5.447003  | -1.449147 | -2.299592 |
| C  | 4.174255  | 0.215805  | -2.009329 |
| C  | 5.129620  | -3.026842 | -0.258449 |
| H  | 4.563761  | -3.850890 | 0.187173  |
| H  | 5.891709  | -2.734920 | 0.476875  |
| H  | 5.656127  | -3.384772 | -1.148539 |
| C  | 4.870352  | 0.944455  | -3.122499 |
| H  | 4.167873  | 1.173220  | -3.934950 |
| H  | 5.692280  | 0.352461  | -3.533518 |
| H  | 5.267167  | 1.909493  | -2.783384 |
| C  | 3.009767  | -2.265179 | 1.415654  |
| C  | 3.816670  | -1.965749 | 2.529626  |
| C  | 3.553163  | -2.620753 | 3.735505  |
| H  | 4.164050  | -2.388348 | 4.608141  |
| C  | 2.517171  | -3.535407 | 3.846276  |
| H  | 2.321400  | -4.030167 | 4.795904  |
| C  | 1.716013  | -3.801375 | 2.742898  |
| H  | 0.890817  | -4.504884 | 2.838431  |
| C  | 1.932852  | -3.170371 | 1.516790  |
| C  | 4.890140  | -0.895144 | 2.506478  |
| H  | 5.024216  | -0.545881 | 1.471521  |
| C  | 4.438501  | 0.302208  | 3.343486  |
| H  | 4.300666  | 0.012058  | 4.393315  |
| H  | 3.479266  | 0.705086  | 2.991314  |
| H  | 5.189274  | 1.103407  | 3.316005  |
| C  | 6.241373  | -1.404899 | 3.004832  |
| H  | 7.010664  | -0.629507 | 2.898604  |
| H  | 6.579750  | -2.293837 | 2.458041  |
| H  | 6.198713  | -1.675902 | 4.067609  |
| C  | 1.066324  | -3.505679 | 0.320717  |
| H  | 0.980780  | -2.595725 | -0.295556 |

|   |           |           |           |
|---|-----------|-----------|-----------|
| C | 1.727526  | -4.593386 | -0.526376 |
| H | 2.695085  | -4.267424 | -0.930753 |
| H | 1.087078  | -4.867615 | -1.373955 |
| H | 1.903467  | -5.498138 | 0.072023  |
| C | -0.360322 | -3.889048 | 0.687688  |
| H | -0.962243 | -3.987366 | -0.223666 |
| H | -0.824170 | -3.115486 | 1.314467  |
| H | -0.416055 | -4.850542 | 1.216979  |
| C | 2.979062  | 2.232946  | -1.567557 |
| C | 2.206412  | 2.718792  | -2.639124 |
| C | 2.098694  | 4.102753  | -2.809157 |
| H | 1.496864  | 4.489653  | -3.631810 |
| C | 2.735972  | 4.987856  | -1.952664 |
| H | 2.650665  | 6.061872  | -2.109802 |
| C | 3.454121  | 4.494554  | -0.870531 |
| H | 3.916252  | 5.192388  | -0.175232 |
| C | 3.570656  | 3.121883  | -0.641002 |
| C | 1.436830  | 1.813208  | -3.579054 |
| H | 1.751571  | 0.774694  | -3.393058 |
| C | -0.059809 | 1.907778  | -3.275600 |
| H | -0.423637 | 2.937248  | -3.408663 |
| H | -0.268245 | 1.617635  | -2.234288 |
| H | -0.649145 | 1.258550  | -3.936305 |
| C | 1.702497  | 2.139761  | -5.048143 |
| H | 1.175233  | 1.438123  | -5.705931 |
| H | 2.770463  | 2.098163  | -5.296373 |
| H | 1.348217  | 3.145529  | -5.306656 |
| C | 4.306390  | 2.615776  | 0.586770  |
| H | 3.827687  | 1.669157  | 0.890941  |
| C | 4.186168  | 3.567280  | 1.771829  |
| H | 4.744885  | 4.498411  | 1.612543  |
| H | 4.594200  | 3.102527  | 2.675713  |
| H | 3.139361  | 3.827120  | 1.971265  |
| C | 5.772230  | 2.298435  | 0.289375  |
| H | 6.300537  | 3.191872  | -0.070928 |
| H | 5.878841  | 1.513318  | -0.469475 |
| H | 6.284574  | 1.950554  | 1.196665  |
| H | 0.688605  | 0.105383  | 2.684507  |
| C | -0.952581 | -0.199248 | 3.150907  |
| C | -1.524499 | 0.921959  | 3.777754  |
| C | -1.136377 | -1.446189 | 3.770383  |
| C | -2.283065 | 0.818770  | 4.948319  |
| H | -1.383695 | 1.913618  | 3.337738  |
| C | -1.902284 | -1.568072 | 4.928317  |
| H | -0.668551 | -2.335090 | 3.343948  |
| C | -2.475348 | -0.445432 | 5.518733  |
| H | -2.043329 | -2.550245 | 5.382270  |
| H | -3.061221 | -0.542392 | 6.434139  |
| C | -2.888356 | 2.035694  | 5.584892  |
| H | -3.984880 | 2.043699  | 5.491478  |
| H | -2.667316 | 2.084481  | 6.659385  |
| H | -2.517456 | 2.956920  | 5.121365  |

TS-1a-toluene\_meta2.log

SCF (wB97x) = -2881.98713229

H(0 K)= -2880.581939

H(298 K)= -2880.501656

G(298 K)= -2880.695143

**S-120**



Lowest Frequency = -716.8842cm<sup>-1</sup>

|    |           |           |           |
|----|-----------|-----------|-----------|
| Pd | -0.026070 | 0.738396  | -0.993292 |
| Al | -1.781636 | -0.330153 | 0.310670  |
| N  | -2.886070 | -1.736556 | -0.517496 |
| N  | -2.459225 | -0.804448 | 2.105578  |
| C  | -3.509221 | -2.743986 | 0.099759  |
| C  | -3.620313 | -2.823317 | 1.495643  |
| H  | -4.185004 | -3.664821 | 1.886458  |
| C  | -3.236971 | -1.849193 | 2.423412  |
| C  | -4.182754 | -3.815875 | -0.706958 |
| H  | -4.885978 | -3.383025 | -1.429323 |
| H  | -4.722081 | -4.517549 | -0.065003 |
| H  | -3.449305 | -4.379480 | -1.297337 |
| C  | -3.814702 | -1.968343 | 3.806531  |
| H  | -3.118576 | -1.656497 | 4.591155  |
| H  | -4.147457 | -2.991448 | 4.004677  |
| H  | -4.692860 | -1.313287 | 3.896955  |
| C  | -3.037907 | -1.622455 | -1.946460 |
| C  | -3.976489 | -0.689160 | -2.436479 |
| C  | -4.184376 | -0.628016 | -3.815483 |
| H  | -4.901700 | 0.086039  | -4.215307 |
| C  | -3.468966 | -1.437162 | -4.689756 |
| H  | -3.645810 | -1.371237 | -5.762286 |
| C  | -2.499266 | -2.296698 | -4.193154 |
| H  | -1.902479 | -2.895174 | -4.881837 |
| C  | -2.259354 | -2.402713 | -2.820408 |
| C  | -4.732739 | 0.232977  | -1.497268 |
| H  | -4.037317 | 0.502124  | -0.680658 |
| C  | -5.148860 | 1.541853  | -2.156548 |
| H  | -4.301596 | 2.030804  | -2.652775 |
| H  | -5.549597 | 2.232566  | -1.404886 |
| H  | -5.941871 | 1.390538  | -2.901176 |
| C  | -5.937374 | -0.457476 | -0.856525 |
| H  | -6.645580 | -0.796243 | -1.625294 |
| H  | -6.474089 | 0.235827  | -0.194204 |
| H  | -5.648581 | -1.329527 | -0.256481 |
| C  | -1.122346 | -3.271720 | -2.327150 |
| H  | -1.206708 | -3.356872 | -1.235164 |
| C  | 0.210099  | -2.587161 | -2.633711 |
| H  | 1.049562  | -3.166743 | -2.228210 |
| H  | 0.251603  | -1.574019 | -2.202980 |
| H  | 0.355326  | -2.491998 | -3.719728 |
| C  | -1.137896 | -4.684260 | -2.906290 |
| H  | -2.090615 | -5.201567 | -2.732003 |
| H  | -0.337887 | -5.286262 | -2.455805 |
| H  | -0.964281 | -4.678573 | -3.990271 |
| C  | -2.259063 | 0.198055  | 3.114908  |
| C  | -1.075977 | 0.186994  | 3.881602  |
| C  | -0.949240 | 1.129559  | 4.905424  |
| H  | -0.055549 | 1.121656  | 5.528369  |
| C  | -1.938878 | 2.075815  | 5.145006  |
| H  | -1.817148 | 2.800863  | 5.948024  |
| C  | -3.070950 | 2.106269  | 4.341659  |
| H  | -3.828903 | 2.871640  | 4.507605  |
| C  | -3.252959 | 1.176933  | 3.314532  |
| C  | -0.001178 | -0.860388 | 3.659696  |
| H  | -0.070604 | -1.184983 | 2.608892  |
| C  | 1.415946  | -0.339594 | 3.872468  |

|    |           |           |           |
|----|-----------|-----------|-----------|
| H  | 1.600939  | -0.027965 | 4.909217  |
| H  | 1.643400  | 0.515187  | 3.223308  |
| H  | 2.146188  | -1.128431 | 3.646586  |
| C  | -0.240663 | -2.084525 | 4.544287  |
| H  | -0.274615 | -1.799807 | 5.605006  |
| H  | 0.571230  | -2.813351 | 4.422065  |
| H  | -1.181801 | -2.593287 | 4.303829  |
| C  | -4.463913 | 1.290736  | 2.408199  |
| H  | -4.548719 | 0.364307  | 1.819802  |
| C  | -4.264480 | 2.444856  | 1.422181  |
| H  | -4.137437 | 3.396531  | 1.956487  |
| H  | -5.132844 | 2.544306  | 0.757784  |
| H  | -3.372782 | 2.299611  | 0.794166  |
| C  | -5.769152 | 1.465025  | 3.180659  |
| H  | -5.915038 | 0.675089  | 3.928244  |
| H  | -6.625809 | 1.443763  | 2.496242  |
| H  | -5.803977 | 2.426438  | 3.708904  |
| Al | 1.959000  | -0.022622 | 0.119430  |
| N  | 3.119979  | 1.362352  | 0.923055  |
| N  | 3.179653  | -1.453471 | 0.663516  |
| C  | 4.131417  | 1.154351  | 1.764993  |
| C  | 4.530200  | -0.134157 | 2.163848  |
| H  | 5.312543  | -0.182966 | 2.916031  |
| C  | 4.140178  | -1.351177 | 1.597982  |
| C  | 4.940834  | 2.309248  | 2.279041  |
| H  | 5.435294  | 2.052561  | 3.220922  |
| H  | 4.334747  | 3.209903  | 2.418807  |
| H  | 5.726967  | 2.568231  | 1.556910  |
| C  | 4.851822  | -2.591177 | 2.056100  |
| H  | 4.145966  | -3.291033 | 2.523107  |
| H  | 5.635892  | -2.356964 | 2.780939  |
| H  | 5.301494  | -3.130185 | 1.212946  |
| C  | 2.896537  | 2.680119  | 0.387007  |
| C  | 3.739573  | 3.163194  | -0.631951 |
| C  | 3.453832  | 4.409751  | -1.195806 |
| H  | 4.092569  | 4.787587  | -1.994480 |
| C  | 2.362956  | 5.156361  | -0.777729 |
| H  | 2.149988  | 6.121133  | -1.235333 |
| C  | 1.530116  | 4.655880  | 0.215028  |
| H  | 0.662492  | 5.235136  | 0.526894  |
| C  | 1.766367  | 3.413354  | 0.806012  |
| C  | 4.880892  | 2.351250  | -1.212617 |
| H  | 5.019208  | 1.443664  | -0.605859 |
| C  | 4.525820  | 1.907707  | -2.632134 |
| H  | 4.393038  | 2.777325  | -3.288976 |
| H  | 3.587078  | 1.338183  | -2.656664 |
| H  | 5.325815  | 1.287992  | -3.058972 |
| C  | 6.204065  | 3.115118  | -1.216717 |
| H  | 7.021340  | 2.471661  | -1.566539 |
| H  | 6.472303  | 3.491288  | -0.221608 |
| H  | 6.162543  | 3.981553  | -1.889289 |
| C  | 0.857902  | 2.908430  | 1.907432  |
| H  | 0.808392  | 1.810105  | 1.823317  |
| C  | 1.441052  | 3.256925  | 3.277143  |
| H  | 2.416113  | 2.779181  | 3.441407  |
| H  | 0.769314  | 2.928897  | 4.080093  |
| H  | 1.580567  | 4.342609  | 3.374313  |
| C  | -0.579118 | 3.395985  | 1.783424  |
| H  | -1.209211 | 2.878577  | 2.517043  |

|   |           |           |           |
|---|-----------|-----------|-----------|
| H | -0.980800 | 3.181395  | 0.783702  |
| H | -0.676307 | 4.473505  | 1.977088  |
| C | 3.057988  | -2.694173 | -0.056430 |
| C | 2.276765  | -3.756460 | 0.435769  |
| C | 2.224726  | -4.942961 | -0.302814 |
| H | 1.616603  | -5.769479 | 0.065642  |
| C | 2.926596  | -5.086635 | -1.490069 |
| H | 2.884366  | -6.023454 | -2.043313 |
| C | 3.655830  | -4.013620 | -1.987254 |
| H | 4.169648  | -4.115630 | -2.940941 |
| C | 3.716559  | -2.797496 | -1.303429 |
| C | 1.446563  | -3.656609 | 1.699284  |
| H | 1.710130  | -2.718668 | 2.212251  |
| C | -0.039468 | -3.589943 | 1.341463  |
| H | -0.352441 | -4.486491 | 0.786426  |
| H | -0.250938 | -2.718027 | 0.703860  |
| H | -0.668235 | -3.517723 | 2.238464  |
| C | 1.709813  | -4.818526 | 2.656764  |
| H | 1.136479  | -4.698831 | 3.584133  |
| H | 2.770553  | -4.904509 | 2.923815  |
| H | 1.407530  | -5.777181 | 2.216724  |
| C | 4.460705  | -1.620307 | -1.908056 |
| H | 3.946236  | -0.701760 | -1.577469 |
| C | 4.416171  | -1.623680 | -3.431970 |
| H | 5.010982  | -2.440045 | -3.861181 |
| H | 4.828484  | -0.688987 | -3.826685 |
| H | 3.387897  | -1.719486 | -3.801572 |
| C | 5.901806  | -1.528907 | -1.405383 |
| H | 6.461979  | -2.440480 | -1.655089 |
| H | 5.951704  | -1.388265 | -0.318502 |
| H | 6.420773  | -0.679873 | -1.870792 |
| H | 0.757397  | 1.472991  | -2.201921 |
| C | -0.884521 | 1.983035  | -2.453296 |
| C | -1.454701 | 1.447170  | -3.619589 |
| C | -1.049383 | 3.358066  | -2.227254 |
| C | -2.197884 | 2.249625  | -4.483863 |
| H | -1.333751 | 0.385649  | -3.845380 |
| C | -1.792192 | 4.177072  | -3.082331 |
| H | -0.575810 | 3.815295  | -1.355015 |
| C | -2.371186 | 3.607424  | -4.222050 |
| H | -2.945031 | 4.232262  | -4.908257 |
| H | -2.647928 | 1.806950  | -5.374678 |
| C | -1.967310 | 5.635240  | -2.771673 |
| H | -1.183551 | 5.995491  | -2.092846 |
| H | -1.937621 | 6.254216  | -3.677320 |
| H | -2.931602 | 5.837201  | -2.283553 |

TS-1a-toluene\_ortho1.log

SCF (wB97x) = -2881.99068593

H(0 K)= -2880.584661

H(298 K)= -2880.505015

G(298 K)= -2880.695689

Lowest Frequency = -716.4129cm<sup>-1</sup>

|    |           |           |           |
|----|-----------|-----------|-----------|
| Pd | -0.024805 | -0.472400 | 1.205716  |
| Al | -1.817324 | 0.080559  | -0.345537 |
| N  | -3.038371 | 1.614733  | -0.146837 |
| N  | -2.515981 | -0.297788 | -2.155447 |

**S-123**

|   |           |           |           |
|---|-----------|-----------|-----------|
| C | -3.764700 | 2.201570  | -1.103515 |
| C | -3.866865 | 1.682371  | -2.401632 |
| H | -4.511775 | 2.225221  | -3.086392 |
| C | -3.379994 | 0.452248  | -2.855667 |
| C | -4.575841 | 3.426554  | -0.790548 |
| H | -5.230975 | 3.251850  | 0.072064  |
| H | -5.189708 | 3.722678  | -1.645385 |
| H | -3.932728 | 4.272366  | -0.517292 |
| C | -3.948335 | -0.057626 | -4.151590 |
| H | -3.213872 | -0.590580 | -4.763154 |
| H | -4.380080 | 0.759719  | -4.736447 |
| H | -4.753635 | -0.776521 | -3.944463 |
| C | -3.171895 | 2.115015  | 1.197710  |
| C | -3.941971 | 1.366722  | 2.112529  |
| C | -4.116619 | 1.883938  | 3.398944  |
| H | -4.695274 | 1.318213  | 4.126353  |
| C | -3.556304 | 3.100060  | 3.768887  |
| H | -3.714047 | 3.488585  | 4.773845  |
| C | -2.760036 | 3.796631  | 2.869552  |
| H | -2.276249 | 4.721610  | 3.182155  |
| C | -2.533754 | 3.310087  | 1.580703  |
| C | -4.571985 | 0.044843  | 1.713357  |
| H | -3.842131 | -0.478541 | 1.067701  |
| C | -4.833475 | -0.877000 | 2.896483  |
| H | -3.943195 | -0.993357 | 3.525403  |
| H | -5.124836 | -1.872979 | 2.541641  |
| H | -5.655798 | -0.508925 | 3.525288  |
| C | -5.846421 | 0.243918  | 0.891343  |
| H | -6.596588 | 0.804481  | 1.466069  |
| H | -6.289318 | -0.726419 | 0.627224  |
| H | -5.662449 | 0.787465  | -0.043919 |
| C | -1.515930 | 3.977401  | 0.681310  |
| H | -1.714098 | 3.666599  | -0.353773 |
| C | -0.123037 | 3.462794  | 1.051879  |
| H | 0.640947  | 3.885852  | 0.388994  |
| H | -0.064858 | 2.363806  | 0.988781  |
| H | 0.128104  | 3.741047  | 2.085840  |
| C | -1.554366 | 5.501190  | 0.715962  |
| H | -2.554519 | 5.898161  | 0.496899  |
| H | -0.855612 | 5.912372  | -0.024174 |
| H | -1.250310 | 5.896373  | 1.693656  |
| C | -2.225435 | -1.604075 | -2.680885 |
| C | -1.055307 | -1.806211 | -3.439714 |
| C | -0.867858 | -3.057382 | -4.034392 |
| H | 0.013883  | -3.226918 | -4.651281 |
| C | -1.786520 | -4.085876 | -3.861337 |
| H | -1.621231 | -5.050629 | -4.338118 |
| C | -2.900660 | -3.886149 | -3.056303 |
| H | -3.598347 | -4.706385 | -2.889635 |
| C | -3.139545 | -2.651723 | -2.447816 |
| C | -0.064085 | -0.683265 | -3.683050 |
| H | -0.153629 | 0.024312  | -2.842691 |
| C | 1.387711  | -1.149341 | -3.724912 |
| H | 1.587087  | -1.835708 | -4.558630 |
| H | 1.685400  | -1.658012 | -2.799382 |
| H | 2.058581  | -0.290056 | -3.858665 |
| C | -0.402305 | 0.074133  | -4.967818 |
| H | -0.425388 | -0.607254 | -5.829495 |
| H | 0.353973  | 0.842909  | -5.172861 |

|    |           |           |           |
|----|-----------|-----------|-----------|
| H  | -1.376366 | 0.574565  | -4.910298 |
| C  | -4.320510 | -2.488767 | -1.509591 |
| H  | -4.500298 | -1.413446 | -1.358012 |
| C  | -3.979460 | -3.093266 | -0.144278 |
| H  | -3.760344 | -4.165997 | -0.237475 |
| H  | -4.819472 | -2.979256 | 0.553703  |
| H  | -3.097263 | -2.616241 | 0.307840  |
| C  | -5.610009 | -3.094060 | -2.057500 |
| H  | -5.848792 | -2.719114 | -3.060807 |
| H  | -6.453809 | -2.855420 | -1.398983 |
| H  | -5.552880 | -4.188229 | -2.120384 |
| Al | 1.925008  | -0.014321 | -0.134081 |
| N  | 3.202233  | -1.507322 | -0.367594 |
| N  | 3.048948  | 1.189623  | -1.206915 |
| C  | 4.210490  | -1.564472 | -1.235891 |
| C  | 4.520001  | -0.502242 | -2.103040 |
| H  | 5.313913  | -0.685151 | -2.821545 |
| C  | 4.035055  | 0.806423  | -2.038369 |
| C  | 5.115548  | -2.761422 | -1.271520 |
| H  | 5.621117  | -2.842296 | -2.238631 |
| H  | 4.580103  | -3.692237 | -1.059865 |
| H  | 5.893300  | -2.665939 | -0.501631 |
| C  | 4.685927  | 1.824688  | -2.930391 |
| H  | 3.955648  | 2.262968  | -3.623162 |
| H  | 5.493372  | 1.378966  | -3.517096 |
| H  | 5.094511  | 2.661717  | -2.350247 |
| C  | 3.067381  | -2.540559 | 0.625773  |
| C  | 3.911768  | -2.528423 | 1.751260  |
| C  | 3.717197  | -3.499431 | 2.736951  |
| H  | 4.357463  | -3.493960 | 3.619430  |
| C  | 2.709723  | -4.445649 | 2.625640  |
| H  | 2.566221  | -5.188488 | 3.408189  |
| C  | 1.868635  | -4.426223 | 1.520078  |
| H  | 1.064347  | -5.156075 | 1.448451  |
| C  | 2.019268  | -3.476159 | 0.508797  |
| C  | 4.950579  | -1.450195 | 1.989880  |
| H  | 5.028255  | -0.823628 | 1.088242  |
| C  | 4.498755  | -0.550772 | 3.141368  |
| H  | 4.414847  | -1.125787 | 4.072855  |
| H  | 3.512801  | -0.106701 | 2.946365  |
| H  | 5.222344  | 0.257397  | 3.313793  |
| C  | 6.337223  | -2.021190 | 2.281294  |
| H  | 7.077045  | -1.215718 | 2.372261  |
| H  | 6.679565  | -2.706669 | 1.496015  |
| H  | 6.348610  | -2.580050 | 3.225916  |
| C  | 1.107346  | -3.489941 | -0.700178 |
| H  | 0.988236  | -2.447498 | -1.036950 |
| C  | 1.737446  | -4.285971 | -1.843179 |
| H  | 2.683004  | -3.841315 | -2.180887 |
| H  | 1.060644  | -4.324863 | -2.706232 |
| H  | 1.946725  | -5.318310 | -1.530091 |
| C  | -0.298890 | -3.983762 | -0.396426 |
| H  | -0.933096 | -3.864482 | -1.281732 |
| H  | -0.745103 | -3.396843 | 0.416857  |
| H  | -0.325686 | -5.046843 | -0.119880 |
| C  | 2.847682  | 2.604667  | -1.027314 |
| C  | 2.069932  | 3.358429  | -1.926906 |
| C  | 1.990417  | 4.742204  | -1.742487 |
| H  | 1.389581  | 5.335060  | -2.432310 |

|   |           |           |           |
|---|-----------|-----------|-----------|
| C | 2.644611  | 5.369934  | -0.692708 |
| H | 2.578376  | 6.449871  | -0.571300 |
| C | 3.350347  | 4.604914  | 0.227057  |
| H | 3.823607  | 5.094099  | 1.076129  |
| C | 3.452212  | 3.218231  | 0.092988  |
| C | 1.244325  | 2.725088  | -3.027820 |
| H | 1.554616  | 1.674239  | -3.131734 |
| C | -0.230450 | 2.737202  | -2.616724 |
| H | -0.586543 | 3.767653  | -2.471588 |
| H | -0.376681 | 2.203124  | -1.664640 |
| H | -0.868626 | 2.266943  | -3.376570 |
| C | 1.428852  | 3.416605  | -4.377196 |
| H | 0.853708  | 2.906831  | -5.159559 |
| H | 2.479847  | 3.438613  | -4.691757 |
| H | 1.075639  | 4.455008  | -4.350174 |
| C | 4.201925  | 2.407970  | 1.134680  |
| H | 3.733705  | 1.409644  | 1.179434  |
| C | 4.086985  | 3.005764  | 2.532315  |
| H | 4.638705  | 3.949917  | 2.625492  |
| H | 4.504531  | 2.318417  | 3.275804  |
| H | 3.040225  | 3.195072  | 2.800620  |
| C | 5.665311  | 2.195859  | 0.746102  |
| H | 6.184150  | 3.158078  | 0.636233  |
| H | 5.764075  | 1.648560  | -0.199984 |
| H | 6.191792  | 1.618054  | 1.517848  |
| H | 0.844990  | -0.916912 | 2.498801  |
| C | -0.802511 | -1.213417 | 3.028260  |
| C | -1.083235 | -0.302565 | 4.072384  |
| C | -1.169593 | -2.554794 | 3.212013  |
| C | -1.768725 | -0.737521 | 5.210059  |
| C | -1.853024 | -2.978905 | 4.351459  |
| H | -0.920744 | -3.290292 | 2.445046  |
| C | -2.163311 | -2.066631 | 5.357019  |
| H | -2.696610 | -2.386512 | 6.251504  |
| H | -1.994783 | -0.012874 | 5.996334  |
| H | -2.142340 | -4.025766 | 4.451921  |
| C | -0.640584 | 1.121269  | 3.948273  |
| H | 0.447962  | 1.180721  | 3.786721  |
| H | -1.099949 | 1.599932  | 3.072196  |
| H | -0.896836 | 1.718310  | 4.833332  |

TS-1a-toluene\_ortho2.log

SCF (wB97x) = -2881.98938383

H(0 K)= -2880.583581

H(298 K)= -2880.503749

G(298 K)= -2880.695666

Lowest Frequency = -662.9194cm-1

|    |          |           |           |
|----|----------|-----------|-----------|
| Pd | 0.020831 | -0.146870 | 1.257892  |
| Al | 1.842228 | 0.204936  | -0.325507 |
| N  | 3.223879 | -1.166963 | -0.611635 |
| N  | 2.433675 | 1.202431  | -1.933171 |
| C  | 3.983442 | -1.342094 | -1.697206 |
| C  | 4.001397 | -0.430676 | -2.762703 |
| H  | 4.687828 | -0.654688 | -3.573973 |
| C  | 3.369198 | 0.815404  | -2.814658 |
| C  | 4.914790 | -2.517215 | -1.783462 |
| H  | 5.575205 | -2.560783 | -0.908376 |

S-126

|   |           |           |           |
|---|-----------|-----------|-----------|
| H | 5.527969  | -2.470744 | -2.687410 |
| H | 4.358281  | -3.463033 | -1.790527 |
| C | 3.851989  | 1.768795  | -3.873596 |
| H | 3.049451  | 2.374359  | -4.305769 |
| H | 4.369200  | 1.232453  | -4.674458 |
| H | 4.568947  | 2.476794  | -3.434169 |
| C | 3.460606  | -2.042329 | 0.510383  |
| C | 4.224162  | -1.546946 | 1.586026  |
| C | 4.560225  | -2.429451 | 2.614185  |
| H | 5.147207  | -2.068086 | 3.456608  |
| C | 4.129071  | -3.749641 | 2.599916  |
| H | 4.404970  | -4.421465 | 3.411425  |
| C | 3.304133  | -4.194245 | 1.575669  |
| H | 2.919456  | -5.213694 | 1.596100  |
| C | 2.946563  | -3.351696 | 0.520806  |
| C | 4.664777  | -0.096658 | 1.636115  |
| H | 3.879736  | 0.497728  | 1.133395  |
| C | 4.754153  | 0.441176  | 3.058857  |
| H | 3.835823  | 0.233383  | 3.622660  |
| H | 4.906554  | 1.527537  | 3.044800  |
| H | 5.599637  | 0.008726  | 3.610276  |
| C | 5.964761  | 0.133815  | 0.866500  |
| H | 6.783259  | -0.460791 | 1.295074  |
| H | 6.262565  | 1.190673  | 0.910670  |
| H | 5.869724  | -0.139818 | -0.192832 |
| C | 1.946098  | -3.810348 | -0.516523 |
| H | 2.041000  | -3.154677 | -1.392724 |
| C | 0.533302  | -3.627932 | 0.040596  |
| H | -0.221968 | -3.892871 | -0.708495 |
| H | 0.351641  | -2.587334 | 0.359035  |
| H | 0.379846  | -4.270312 | 0.920097  |
| C | 2.155373  | -5.243814 | -0.993334 |
| H | 3.175315  | -5.416365 | -1.362158 |
| H | 1.455818  | -5.477102 | -1.806759 |
| H | 1.967414  | -5.972162 | -0.194085 |
| C | 1.970875  | 2.559987  | -2.038974 |
| C | 0.755761  | 2.831661  | -2.701143 |
| C | 0.373643  | 4.167592  | -2.851138 |
| H | -0.557737 | 4.402440  | -3.364621 |
| C | 1.160809  | 5.203777  | -2.361959 |
| H | 0.847561  | 6.237760  | -2.499013 |
| C | 2.332891  | 4.914700  | -1.675676 |
| H | 2.928787  | 5.727694  | -1.261850 |
| C | 2.753813  | 3.595394  | -1.490443 |
| C | -0.079793 | 1.717103  | -3.302761 |
| H | 0.049087  | 0.827975  | -2.662331 |
| C | -1.570718 | 2.030679  | -3.352949 |
| H | -1.802123 | 2.843546  | -4.053972 |
| H | -1.969230 | 2.313991  | -2.370221 |
| H | -2.134086 | 1.152379  | -3.694918 |
| C | 0.408979  | 1.358715  | -4.707183 |
| H | 0.399909  | 2.242439  | -5.360212 |
| H | -0.246820 | 0.603994  | -5.160834 |
| H | 1.426410  | 0.951876  | -4.704357 |
| C | 3.984984  | 3.308579  | -0.652072 |
| H | 4.305006  | 2.273344  | -0.844422 |
| C | 3.627224  | 3.408814  | 0.833361  |
| H | 3.282931  | 4.421856  | 1.083781  |
| H | 4.498387  | 3.181827  | 1.462197  |

|    |           |           |           |
|----|-----------|-----------|-----------|
| H  | 2.820493  | 2.712101  | 1.106850  |
| C  | 5.163458  | 4.219903  | -0.983402 |
| H  | 5.405678  | 4.208829  | -2.053655 |
| H  | 6.057593  | 3.904514  | -0.432262 |
| H  | 4.965512  | 5.262072  | -0.702170 |
| Al | -1.913118 | -0.043178 | -0.147935 |
| N  | -3.329299 | 1.312587  | -0.004358 |
| N  | -2.945375 | -1.060239 | -1.484737 |
| C  | -4.298917 | 1.536348  | -0.894930 |
| C  | -4.544046 | 0.679231  | -1.976837 |
| H  | -5.336960 | 0.976073  | -2.656951 |
| C  | -3.973856 | -0.579838 | -2.201338 |
| C  | -5.185383 | 2.736809  | -0.738288 |
| H  | -4.583905 | 3.653426  | -0.681626 |
| H  | -5.753532 | 2.694197  | 0.198786  |
| H  | -5.889723 | 2.826484  | -1.569517 |
| C  | -4.576603 | -1.418057 | -3.292153 |
| H  | -3.845308 | -1.615177 | -4.086762 |
| H  | -5.444348 | -0.924292 | -3.736988 |
| H  | -4.885402 | -2.400802 | -2.914375 |
| C  | -3.351394 | 2.066013  | 1.224505  |
| C  | -4.144681 | 1.579703  | 2.284332  |
| C  | -4.173647 | 2.300769  | 3.479355  |
| H  | -4.786371 | 1.934408  | 4.303506  |
| C  | -3.432513 | 3.464166  | 3.637856  |
| H  | -3.465461 | 4.012354  | 4.577792  |
| C  | -2.635280 | 3.911474  | 2.594511  |
| H  | -2.030231 | 4.809201  | 2.724541  |
| C  | -2.572302 | 3.226771  | 1.377319  |
| C  | -4.950266 | 0.298560  | 2.185300  |
| H  | -4.782073 | -0.144420 | 1.193117  |
| C  | -4.480454 | -0.713693 | 3.228395  |
| H  | -4.611783 | -0.327330 | 4.247359  |
| H  | -3.417028 | -0.956554 | 3.101239  |
| H  | -5.061610 | -1.642586 | 3.154779  |
| C  | -6.450126 | 0.557177  | 2.322051  |
| H  | -7.017173 | -0.377478 | 2.223840  |
| H  | -6.820053 | 1.252406  | 1.557954  |
| H  | -6.692176 | 0.987332  | 3.302931  |
| C  | -1.650666 | 3.749600  | 0.297339  |
| H  | -1.745726 | 3.096477  | -0.581702 |
| C  | -2.018358 | 5.168458  | -0.133245 |
| H  | -3.054538 | 5.240869  | -0.489517 |
| H  | -1.356430 | 5.504374  | -0.941485 |
| H  | -1.908858 | 5.878401  | 0.697281  |
| C  | -0.196852 | 3.680446  | 0.756601  |
| H  | 0.471626  | 4.077145  | -0.015847 |
| H  | 0.097856  | 2.641711  | 0.968696  |
| H  | -0.039005 | 4.267484  | 1.672791  |
| C  | -2.595692 | -2.444519 | -1.679954 |
| C  | -1.792875 | -2.846762 | -2.764626 |
| C  | -1.587478 | -4.214004 | -2.971048 |
| H  | -0.968593 | -4.536502 | -3.808506 |
| C  | -2.138925 | -5.162533 | -2.121996 |
| H  | -1.977482 | -6.223607 | -2.304812 |
| C  | -2.857884 | -4.746511 | -1.008773 |
| H  | -3.243192 | -5.490498 | -0.314454 |
| C  | -3.083803 | -3.391666 | -0.753147 |
| C  | -1.062018 | -1.859159 | -3.650947 |



|   |           |           |           |
|---|-----------|-----------|-----------|
| H | -1.469130 | -0.854875 | -3.460576 |
| C | 0.416658  | -1.844525 | -3.253476 |
| H | 0.868012  | -2.836633 | -3.399661 |
| H | 0.531066  | -1.586328 | -2.189132 |
| H | 0.992940  | -1.123693 | -3.847982 |
| C | -1.215651 | -2.163215 | -5.139442 |
| H | -0.717899 | -1.397660 | -5.747186 |
| H | -2.267743 | -2.205127 | -5.448347 |
| H | -0.759430 | -3.125050 | -5.405185 |
| C | -3.842300 | -2.968304 | 0.491036  |
| H | -3.449230 | -1.984270 | 0.799963  |
| C | -3.607897 | -3.910181 | 1.666541  |
| H | -4.070776 | -4.893017 | 1.510185  |
| H | -4.045428 | -3.493202 | 2.579912  |
| H | -2.536526 | -4.060152 | 1.847971  |
| C | -5.335033 | -2.793706 | 0.211512  |
| H | -5.775494 | -3.729370 | -0.159619 |
| H | -5.525956 | -2.010971 | -0.534456 |
| H | -5.871252 | -2.512965 | 1.127937  |
| H | -0.806483 | -0.630619 | 2.558315  |
| C | 0.798155  | -0.496704 | 3.202543  |
| C | 1.312587  | -1.752774 | 3.556952  |
| C | 0.908242  | 0.553696  | 4.140801  |
| C | 1.949989  | -1.965179 | 4.778530  |
| C | 1.539115  | 0.326268  | 5.367542  |
| C | 2.063879  | -0.922806 | 5.694721  |
| H | 2.548061  | -1.079968 | 6.657987  |
| H | 2.357351  | -2.949983 | 5.011182  |
| H | 1.621127  | 1.151585  | 6.078700  |
| H | 1.230750  | -2.583366 | 2.851863  |
| C | 0.392156  | 1.915939  | 3.798072  |
| H | -0.585198 | 1.857883  | 3.294349  |
| H | 0.291268  | 2.561880  | 4.680977  |
| H | 1.067312  | 2.422857  | 3.090298  |

TS-1a-toluene\_para.log

SCF (wB97x) = -2881.98670334

H(0 K)= -2880.581077

H(298 K)= -2880.500957

G(298 K)= -2880.693631

Lowest Frequency = -720.6193cm<sup>-1</sup>

|    |           |           |           |
|----|-----------|-----------|-----------|
| Pd | -0.071765 | 0.935464  | -0.807527 |
| Al | -1.720034 | -0.410863 | 0.378218  |
| N  | -2.843336 | -1.693714 | -0.607384 |
| N  | -2.290076 | -1.185554 | 2.106319  |
| C  | -3.405543 | -2.808116 | -0.130837 |
| C  | -3.438434 | -3.114016 | 1.237297  |
| H  | -3.960571 | -4.025233 | 1.514335  |
| C  | -3.027805 | -2.289525 | 2.290213  |
| C  | -4.091219 | -3.760701 | -1.066552 |
| H  | -4.854062 | -3.247627 | -1.665342 |
| H  | -4.563574 | -4.582786 | -0.522143 |
| H  | -3.376359 | -4.183998 | -1.783394 |
| C  | -3.526668 | -2.644853 | 3.663337  |
| H  | -2.790687 | -2.452587 | 4.450121  |
| H  | -3.837875 | -3.692613 | 3.708023  |
| H  | -4.404354 | -2.029499 | 3.907116  |

S-129

|    |           |           |           |
|----|-----------|-----------|-----------|
| C  | -3.088379 | -1.351676 | -1.986246 |
| C  | -4.089861 | -0.395024 | -2.258466 |
| C  | -4.390583 | -0.120204 | -3.593471 |
| H  | -5.157912 | 0.615714  | -3.826492 |
| C  | -3.704633 | -0.740530 | -4.630538 |
| H  | -3.954397 | -0.508905 | -5.664913 |
| C  | -2.672434 | -1.621627 | -4.341411 |
| H  | -2.099831 | -2.070099 | -5.153638 |
| C  | -2.339539 | -1.939481 | -3.021767 |
| C  | -4.814497 | 0.327457  | -1.136898 |
| H  | -4.083073 | 0.471435  | -0.320478 |
| C  | -5.292512 | 1.717949  | -1.537207 |
| H  | -4.477948 | 2.314692  | -1.965573 |
| H  | -5.681682 | 2.250294  | -0.660981 |
| H  | -6.110209 | 1.675706  | -2.269448 |
| C  | -5.967429 | -0.499684 | -0.566978 |
| H  | -6.711603 | -0.718287 | -1.345242 |
| H  | -6.477990 | 0.049935  | 0.235888  |
| H  | -5.627912 | -1.455003 | -0.147439 |
| C  | -1.142392 | -2.824278 | -2.748501 |
| H  | -1.144535 | -3.080022 | -1.680248 |
| C  | 0.142496  | -2.046128 | -3.034513 |
| H  | 1.026237  | -2.649319 | -2.789131 |
| H  | 0.189823  | -1.113359 | -2.449936 |
| H  | 0.201435  | -1.774819 | -4.098745 |
| C  | -1.156684 | -4.129856 | -3.540277 |
| H  | -2.076852 | -4.708378 | -3.384714 |
| H  | -0.306704 | -4.759662 | -3.246749 |
| H  | -1.065205 | -3.948474 | -4.619197 |
| C  | -2.044727 | -0.358764 | 3.255232  |
| C  | -0.818690 | -0.471670 | 3.941696  |
| C  | -0.642702 | 0.290656  | 5.099471  |
| H  | 0.286258  | 0.199483  | 5.661115  |
| C  | -1.627573 | 1.162682  | 5.548511  |
| H  | -1.467244 | 1.747261  | 6.452924  |
| C  | -2.805533 | 1.301575  | 4.826502  |
| H  | -3.561011 | 2.012437  | 5.160531  |
| C  | -3.036952 | 0.551553  | 3.670739  |
| C  | 0.254021  | -1.444435 | 3.489211  |
| H  | 0.126708  | -1.593732 | 2.404862  |
| C  | 1.674042  | -0.933636 | 3.706379  |
| H  | 1.914286  | -0.790922 | 4.768475  |
| H  | 1.851991  | 0.020495  | 3.194669  |
| H  | 2.400577  | -1.658201 | 3.314702  |
| C  | 0.083174  | -2.803085 | 4.170050  |
| H  | 0.106413  | -2.698526 | 5.263601  |
| H  | 0.896947  | -3.482415 | 3.884147  |
| H  | -0.862849 | -3.287297 | 3.900033  |
| C  | -4.299718 | 0.786758  | 2.864097  |
| H  | -4.416267 | -0.040920 | 2.147857  |
| C  | -4.161675 | 2.079004  | 2.054575  |
| H  | -4.002822 | 2.939646  | 2.718886  |
| H  | -5.068900 | 2.269694  | 1.466596  |
| H  | -3.310018 | 2.040122  | 1.358818  |
| C  | -5.558683 | 0.825846  | 3.726581  |
| H  | -5.655020 | -0.067112 | 4.357071  |
| H  | -6.453309 | 0.891347  | 3.095579  |
| H  | -5.570707 | 1.699324  | 4.390923  |
| Al | 1.996411  | 0.044130  | 0.036463  |

|   |           |           |           |
|---|-----------|-----------|-----------|
| N | 3.186176  | 1.291045  | 1.007032  |
| N | 3.261762  | -1.435631 | 0.267480  |
| C | 4.243722  | 0.964678  | 1.748341  |
| C | 4.677977  | -0.364321 | 1.900049  |
| H | 5.500908  | -0.524801 | 2.590897  |
| C | 4.271158  | -1.474079 | 1.154473  |
| C | 5.066216  | 2.032048  | 2.409607  |
| H | 5.815205  | 2.419518  | 1.705756  |
| H | 5.607082  | 1.631239  | 3.272419  |
| H | 4.459301  | 2.886903  | 2.723983  |
| C | 5.022530  | -2.758384 | 1.355432  |
| H | 4.353184  | -3.542321 | 1.734224  |
| H | 5.843596  | -2.633172 | 2.066199  |
| H | 5.430359  | -3.137183 | 0.410027  |
| C | 2.918567  | 2.675196  | 0.715679  |
| C | 3.701683  | 3.342335  | -0.245399 |
| C | 3.371818  | 4.660392  | -0.572086 |
| H | 3.963980  | 5.183023  | -1.323675 |
| C | 2.293318  | 5.300151  | 0.019349  |
| H | 2.045861  | 6.324313  | -0.254139 |
| C | 1.517799  | 4.619550  | 0.949541  |
| H | 0.660851  | 5.118604  | 1.398342  |
| C | 1.802194  | 3.300975  | 1.308620  |
| C | 4.818787  | 2.664052  | -1.014032 |
| H | 4.999909  | 1.669758  | -0.578737 |
| C | 4.390220  | 2.460824  | -2.467666 |
| H | 4.212170  | 3.426604  | -2.958467 |
| H | 3.457281  | 1.885616  | -2.539014 |
| H | 5.171430  | 1.938339  | -3.035971 |
| C | 6.131586  | 3.443381  | -0.957079 |
| H | 6.935372  | 2.884208  | -1.452685 |
| H | 6.449370  | 3.651225  | 0.072245  |
| H | 6.045085  | 4.409957  | -1.469920 |
| C | 0.963619  | 2.596525  | 2.354552  |
| H | 0.930370  | 1.526173  | 2.092312  |
| C | 1.614159  | 2.728702  | 3.731963  |
| H | 2.605127  | 2.256504  | 3.764578  |
| H | 0.993031  | 2.253997  | 4.501637  |
| H | 1.739404  | 3.786490  | 4.002168  |
| C | -0.486703 | 3.057867  | 2.386100  |
| H | -1.065519 | 2.411065  | 3.056567  |
| H | -0.938273 | 2.996192  | 1.386521  |
| H | -0.593623 | 4.086734  | 2.757477  |
| C | 3.118706  | -2.538749 | -0.646566 |
| C | 2.383065  | -3.688599 | -0.302555 |
| C | 2.307989  | -4.733260 | -1.229433 |
| H | 1.734304  | -5.625168 | -0.976037 |
| C | 2.946052  | -4.656902 | -2.458153 |
| H | 2.887618  | -5.487345 | -3.159914 |
| C | 3.631735  | -3.498394 | -2.801467 |
| H | 4.095235  | -3.425223 | -3.783191 |
| C | 3.710771  | -2.414235 | -1.924720 |
| C | 1.628030  | -3.827659 | 1.003782  |
| H | 1.908489  | -2.985542 | 1.655125  |
| C | 0.122480  | -3.737352 | 0.748733  |
| H | -0.210999 | -4.532031 | 0.065133  |
| H | -0.139283 | -2.773944 | 0.285560  |
| H | -0.452133 | -3.836247 | 1.678932  |
| C | 1.964376  | -5.129785 | 1.730108  |

|   |           |           |           |
|---|-----------|-----------|-----------|
| H | 1.449355  | -5.182053 | 2.697146  |
| H | 3.040684  | -5.237311 | 1.913935  |
| H | 1.645317  | -6.005647 | 1.151246  |
| C | 4.404235  | -1.135070 | -2.358071 |
| H | 3.893395  | -0.297170 | -1.853629 |
| C | 4.282266  | -0.884748 | -3.856944 |
| H | 4.868254  | -1.602862 | -4.444726 |
| H | 4.658511  | 0.112745  | -4.107698 |
| H | 3.238466  | -0.943069 | -4.188822 |
| C | 5.867968  | -1.093903 | -1.917681 |
| H | 6.428317  | -1.937819 | -2.343078 |
| H | 5.972611  | -1.133783 | -0.826416 |
| H | 6.348675  | -0.167346 | -2.260058 |
| H | 0.599640  | 1.920977  | -1.900371 |
| C | -1.089599 | 2.352942  | -1.979319 |
| C | -1.691618 | 1.965762  | -3.189229 |
| C | -1.358830 | 3.653428  | -1.525599 |
| C | -2.564810 | 2.809777  | -3.869342 |
| H | -1.496806 | 0.970195  | -3.595021 |
| C | -2.237167 | 4.495011  | -2.207050 |
| H | -0.875249 | 4.017826  | -0.616781 |
| C | -2.864801 | 4.089641  | -3.388149 |
| H | -3.036850 | 2.460777  | -4.791654 |
| H | -2.440634 | 5.493976  | -1.813894 |
| C | -3.846253 | 4.972985  | -4.098734 |
| H | -4.880418 | 4.617281  | -3.973554 |
| H | -3.813271 | 6.001422  | -3.719832 |
| H | -3.659937 | 5.011924  | -5.180037 |

TS-1a\_TS1-PdAl2.log

SCF (wB97x) = -2842.67632580

H(0 K) = -2841.298181

H(298 K) = -2841.219929

G(298 K) = -2841.408364

Lowest Frequency = -728.6078cm<sup>-1</sup>

|    |           |           |           |
|----|-----------|-----------|-----------|
| Pd | -0.009836 | -0.318570 | 1.292626  |
| Al | -1.817995 | 0.042909  | -0.296089 |
| N  | -2.968974 | 1.631269  | -0.135847 |
| N  | -2.541101 | -0.344283 | -2.095407 |
| C  | -3.638710 | 2.247086  | -1.114055 |
| C  | -3.774874 | 1.700321  | -2.398200 |
| H  | -4.378195 | 2.267306  | -3.101242 |
| C  | -3.366511 | 0.428977  | -2.815065 |
| C  | -4.336825 | 3.547445  | -0.840582 |
| H  | -5.016061 | 3.459029  | 0.016458  |
| H  | -4.907131 | 3.883814  | -1.710609 |
| H  | -3.613753 | 4.329443  | -0.576174 |
| C  | -3.968736 | -0.091025 | -4.090913 |
| H  | -3.268820 | -0.687347 | -4.684315 |
| H  | -4.355011 | 0.728406  | -4.704058 |
| H  | -4.813892 | -0.753525 | -3.855863 |
| C  | -3.103775 | 2.147100  | 1.203552  |
| C  | -4.007653 | 1.496338  | 2.070420  |
| C  | -4.203686 | 2.037312  | 3.342239  |
| H  | -4.894286 | 1.550470  | 4.028049  |
| C  | -3.508618 | 3.165058  | 3.761817  |
| H  | -3.676299 | 3.569355  | 4.759014  |

S-132

|    |           |           |           |
|----|-----------|-----------|-----------|
| C  | -2.569950 | 3.746041  | 2.921167  |
| H  | -1.986915 | 4.599543  | 3.268013  |
| C  | -2.343031 | 3.248565  | 1.635008  |
| C  | -4.739582 | 0.236926  | 1.642927  |
| H  | -4.044559 | -0.339493 | 1.004634  |
| C  | -5.098902 | -0.667965 | 2.814661  |
| H  | -4.228087 | -0.872492 | 3.449466  |
| H  | -5.485570 | -1.626079 | 2.447147  |
| H  | -5.886343 | -0.230070 | 3.442675  |
| C  | -5.976411 | 0.546110  | 0.798458  |
| H  | -6.690514 | 1.159511  | 1.365137  |
| H  | -6.490640 | -0.381463 | 0.511334  |
| H  | -5.728171 | 1.084505  | -0.124774 |
| C  | -1.234667 | 3.842396  | 0.792674  |
| H  | -1.321220 | 3.434380  | -0.223495 |
| C  | 0.117971  | 3.401428  | 1.352705  |
| H  | 0.939462  | 3.771099  | 0.725646  |
| H  | 0.193382  | 2.303535  | 1.407248  |
| H  | 0.262570  | 3.795449  | 2.369311  |
| C  | -1.294288 | 5.364492  | 0.689860  |
| H  | -2.261401 | 5.724934  | 0.315203  |
| H  | -0.510891 | 5.728263  | 0.012022  |
| H  | -1.124497 | 5.841791  | 1.663869  |
| C  | -2.300207 | -1.676037 | -2.577014 |
| C  | -1.128478 | -1.945741 | -3.313174 |
| C  | -0.962645 | -3.231625 | -3.834365 |
| H  | -0.078232 | -3.454966 | -4.429904 |
| C  | -1.902599 | -4.230528 | -3.609678 |
| H  | -1.751504 | -5.225282 | -4.025606 |
| C  | -3.022148 | -3.960267 | -2.833923 |
| H  | -3.739975 | -4.754212 | -2.628785 |
| C  | -3.242252 | -2.687322 | -2.301843 |
| C  | -0.108437 | -0.860594 | -3.602729 |
| H  | -0.188547 | -0.110773 | -2.799333 |
| C  | 1.332045  | -1.360943 | -3.606597 |
| H  | 1.524300  | -2.090254 | -4.404873 |
| H  | 1.608101  | -1.831320 | -2.654490 |
| H  | 2.023105  | -0.523727 | -3.773320 |
| C  | -0.416042 | -0.159399 | -4.926486 |
| H  | -0.440690 | -0.880680 | -5.755001 |
| H  | 0.357163  | 0.585238  | -5.157020 |
| H  | -1.381164 | 0.360727  | -4.906590 |
| C  | -4.435012 | -2.448530 | -1.395828 |
| H  | -4.570667 | -1.362733 | -1.276767 |
| C  | -4.155858 | -3.032553 | -0.008234 |
| H  | -3.971600 | -4.113959 | -0.070904 |
| H  | -5.011903 | -2.874661 | 0.660635  |
| H  | -3.271549 | -2.576110 | 0.461217  |
| C  | -5.735425 | -3.012491 | -1.962743 |
| H  | -5.934167 | -2.650248 | -2.979295 |
| H  | -6.584648 | -2.726147 | -1.330538 |
| H  | -5.720896 | -4.109172 | -2.002348 |
| Al | 1.934680  | -0.029316 | -0.092566 |
| N  | 3.156384  | -1.574761 | -0.265285 |
| N  | 3.073149  | 1.076256  | -1.242911 |
| C  | 4.146436  | -1.709175 | -1.146470 |
| C  | 4.473405  | -0.703670 | -2.073682 |
| H  | 5.244291  | -0.950570 | -2.798222 |
| C  | 4.027358  | 0.620795  | -2.072969 |

|   |           |           |           |
|---|-----------|-----------|-----------|
| C | 5.008990  | -2.937465 | -1.137045 |
| H | 4.447203  | -3.835594 | -0.861654 |
| H | 5.810165  | -2.827994 | -0.393581 |
| H | 5.485696  | -3.089242 | -2.110270 |
| C | 4.671314  | 1.570322  | -3.041407 |
| H | 3.927614  | 1.967784  | -3.744924 |
| H | 5.461221  | 1.079515  | -3.615993 |
| H | 5.098776  | 2.439901  | -2.526918 |
| C | 3.005786  | -2.541633 | 0.790862  |
| C | 3.885634  | -2.507426 | 1.889288  |
| C | 3.671036  | -3.402827 | 2.940485  |
| H | 4.339140  | -3.377143 | 3.801666  |
| C | 2.612497  | -4.297981 | 2.919000  |
| H | 2.455759  | -4.982092 | 3.751082  |
| C | 1.740810  | -4.303168 | 1.837353  |
| H | 0.899859  | -4.994325 | 1.831725  |
| C | 1.908248  | -3.427209 | 0.763507  |
| C | 4.989338  | -1.477434 | 2.029838  |
| H | 5.078197  | -0.917586 | 1.086664  |
| C | 4.620406  | -0.478549 | 3.127142  |
| H | 4.531795  | -0.983621 | 4.097893  |
| H | 3.655603  | 0.006688  | 2.926649  |
| H | 5.391938  | 0.296939  | 3.224943  |
| C | 6.349290  | -2.106679 | 2.327336  |
| H | 7.134886  | -1.340544 | 2.342240  |
| H | 6.630214  | -2.864377 | 1.585229  |
| H | 6.356376  | -2.597500 | 3.309043  |
| C | 0.965386  | -3.481934 | -0.420112 |
| H | 0.868218  | -2.458483 | -0.817561 |
| C | 1.548712  | -4.366340 | -1.522489 |
| H | 2.499495  | -3.971274 | -1.904452 |
| H | 0.854313  | -4.440789 | -2.368643 |
| H | 1.735917  | -5.382003 | -1.147016 |
| C | -0.446825 | -3.918152 | -0.056346 |
| H | -1.105489 | -3.797849 | -0.924936 |
| H | -0.849228 | -3.301164 | 0.758658  |
| H | -0.497807 | -4.974129 | 0.243951  |
| C | 2.900524  | 2.500653  | -1.122885 |
| C | 2.063572  | 3.217122  | -1.999182 |
| C | 1.963938  | 4.603184  | -1.840708 |
| H | 1.312214  | 5.166520  | -2.509104 |
| C | 2.674668  | 5.271259  | -0.855261 |
| H | 2.594913  | 6.352782  | -0.758001 |
| C | 3.462542  | 4.545984  | 0.029842  |
| H | 3.984953  | 5.068664  | 0.828455  |
| C | 3.571343  | 3.156923  | -0.064891 |
| C | 1.229983  | 2.552979  | -3.076279 |
| H | 1.531155  | 1.496113  | -3.141909 |
| C | -0.250339 | 2.592158  | -2.692670 |
| H | -0.599728 | 3.627623  | -2.567030 |
| H | -0.423302 | 2.069359  | -1.739887 |
| H | -0.878425 | 2.120489  | -3.459596 |
| C | 1.437976  | 3.198156  | -4.446328 |
| H | 0.867372  | 2.668125  | -5.218738 |
| H | 2.492759  | 3.202206  | -4.748296 |
| H | 1.094568  | 4.240301  | -4.454880 |
| C | 4.379871  | 2.385656  | 0.963106  |
| H | 3.903271  | 1.397521  | 1.082464  |
| C | 4.362468  | 3.049192  | 2.335652  |

|   |           |           |           |
|---|-----------|-----------|-----------|
| H | 4.928435  | 3.989435  | 2.347187  |
| H | 4.822907  | 2.392442  | 3.081385  |
| H | 3.338041  | 3.263287  | 2.663950  |
| C | 5.815181  | 2.135156  | 0.499193  |
| H | 6.335221  | 3.083693  | 0.306890  |
| H | 5.854187  | 1.535592  | -0.418617 |
| H | 6.381612  | 1.594146  | 1.269361  |
| H | 0.799189  | -0.467729 | 2.685325  |
| C | -0.831536 | -0.822819 | 3.161767  |
| C | -1.377166 | 0.176871  | 3.985920  |
| C | -1.013163 | -2.157289 | 3.563411  |
| C | -2.112267 | -0.143023 | 5.126247  |
| H | -1.243480 | 1.227467  | 3.718084  |
| C | -1.749953 | -2.479889 | 4.702011  |
| H | -0.567983 | -2.960640 | 2.972610  |
| C | -2.306799 | -1.474665 | 5.492110  |
| H | -2.541015 | 0.658640  | 5.730438  |
| H | -1.884842 | -3.526704 | 4.978397  |
| H | -2.877257 | -1.725803 | 6.385611  |

TS-1b-toluene\_meta1.log

SCF (wB97x) = -2687.83041724

H(0 K)= -2686.579965

H(298 K)= -2686.515437

G(298 K)= -2686.678918

Lowest Frequency = -808.3652cm-1

|    |           |           |           |
|----|-----------|-----------|-----------|
| Pd | 0.888853  | 0.090196  | -1.012700 |
| P  | 2.000603  | -0.389572 | 1.031822  |
| C  | 2.063591  | 1.108427  | 2.133453  |
| H  | 2.712058  | 0.887541  | 3.000215  |
| C  | 0.689306  | 1.523287  | 2.667369  |
| H  | 0.009865  | 1.691015  | 1.811934  |
| H  | 0.242196  | 0.712369  | 3.262931  |
| C  | 0.780506  | 2.796072  | 3.504473  |
| H  | -0.220815 | 3.087070  | 3.854692  |
| H  | 1.380997  | 2.596064  | 4.407661  |
| C  | 1.413984  | 3.936970  | 2.718129  |
| H  | 1.484910  | 4.840894  | 3.339250  |
| H  | 0.757021  | 4.190391  | 1.870228  |
| C  | 2.781264  | 3.537497  | 2.179772  |
| H  | 3.476302  | 3.367064  | 3.019224  |
| H  | 3.214118  | 4.350547  | 1.580005  |
| C  | 2.678239  | 2.270198  | 1.341862  |
| H  | 3.661037  | 1.995892  | 0.930130  |
| H  | 2.030455  | 2.459065  | 0.467998  |
| C  | 3.811717  | -0.745792 | 0.748471  |
| H  | 4.043047  | -0.035921 | -0.067187 |
| C  | 4.818600  | -0.475751 | 1.871003  |
| H  | 4.656367  | -1.171990 | 2.708361  |
| H  | 4.689775  | 0.535351  | 2.281305  |
| C  | 6.244890  | -0.636255 | 1.349149  |
| H  | 6.423806  | 0.124690  | 0.570681  |
| H  | 6.968071  | -0.437399 | 2.152161  |
| C  | 6.468153  | -2.021488 | 0.754343  |
| H  | 6.367906  | -2.775778 | 1.552860  |
| H  | 7.492715  | -2.114563 | 0.369421  |
| C  | 5.454588  | -2.314109 | -0.345537 |

S-135

|    |           |           |           |
|----|-----------|-----------|-----------|
| H  | 5.597641  | -3.328354 | -0.743586 |
| H  | 5.614409  | -1.621051 | -1.186414 |
| C  | 4.025980  | -2.144045 | 0.159006  |
| H  | 3.305493  | -2.323323 | -0.654226 |
| H  | 3.825516  | -2.904135 | 0.933139  |
| C  | 1.288393  | -1.722723 | 2.117992  |
| H  | 0.358296  | -1.250585 | 2.486241  |
| C  | 0.846056  | -2.951423 | 1.310713  |
| H  | 0.187434  | -2.630656 | 0.486805  |
| H  | 1.719549  | -3.426226 | 0.838190  |
| C  | 0.139775  | -3.974389 | 2.195004  |
| H  | -0.121067 | -4.861857 | 1.603070  |
| H  | -0.816692 | -3.549506 | 2.541018  |
| C  | 0.980986  | -4.359034 | 3.406198  |
| H  | 0.441733  | -5.078439 | 4.037489  |
| H  | 1.896616  | -4.871083 | 3.066391  |
| C  | 1.373291  | -3.126697 | 4.211609  |
| H  | 1.985554  | -3.406189 | 5.079949  |
| H  | 0.463388  | -2.649095 | 4.612337  |
| C  | 2.120400  | -2.125175 | 3.336881  |
| H  | 3.060837  | -2.587383 | 2.996503  |
| H  | 2.406903  | -1.237701 | 3.920885  |
| Al | -1.518742 | 0.151333  | -0.712184 |
| N  | -2.815755 | 1.632844  | -0.641574 |
| N  | -2.930294 | -1.089617 | -1.291117 |
| C  | -3.964910 | 1.686800  | -1.328515 |
| C  | -4.511730 | 0.576819  | -1.986523 |
| H  | -5.436346 | 0.744643  | -2.530584 |
| C  | -4.079544 | -0.752044 | -1.882931 |
| C  | -4.739901 | 2.971573  | -1.381313 |
| H  | -4.966743 | 3.338470  | -0.372403 |
| H  | -5.677543 | 2.847982  | -1.929242 |
| H  | -4.154903 | 3.762703  | -1.867041 |
| C  | -4.978738 | -1.824561 | -2.423091 |
| H  | -5.789624 | -1.400916 | -3.021471 |
| H  | -5.425231 | -2.404776 | -1.604971 |
| H  | -4.419782 | -2.544196 | -3.032957 |
| C  | -2.456599 | 2.777908  | 0.151625  |
| C  | -2.745612 | 2.750463  | 1.534071  |
| C  | -2.470972 | 3.893787  | 2.288092  |
| H  | -2.697368 | 3.900094  | 3.352637  |
| C  | -1.900588 | 5.020787  | 1.708112  |
| H  | -1.692741 | 5.900647  | 2.315153  |
| C  | -1.557583 | 5.001829  | 0.364228  |
| H  | -1.063252 | 5.866576  | -0.078598 |
| C  | -1.818206 | 3.885986  | -0.436131 |
| C  | -3.327640 | 1.511835  | 2.192138  |
| H  | -2.852806 | 0.638373  | 1.709083  |
| C  | -3.011355 | 1.426848  | 3.680886  |
| H  | -1.942168 | 1.568204  | 3.880312  |
| H  | -3.300826 | 0.446428  | 4.076079  |
| H  | -3.564027 | 2.178528  | 4.259404  |
| C  | -4.836418 | 1.385382  | 1.972082  |
| H  | -5.360916 | 2.266210  | 2.367201  |
| H  | -5.229244 | 0.503374  | 2.496233  |
| H  | -5.098907 | 1.280454  | 0.912998  |
| C  | -1.332608 | 3.875451  | -1.870758 |
| H  | -1.764388 | 3.000327  | -2.377536 |
| C  | 0.187422  | 3.705914  | -1.878855 |



|   |           |           |           |
|---|-----------|-----------|-----------|
| H | 0.576220  | 3.632213  | -2.902590 |
| H | 0.479524  | 2.786780  | -1.349658 |
| H | 0.678686  | 4.557714  | -1.385114 |
| C | -1.740511 | 5.122343  | -2.651917 |
| H | -2.824997 | 5.291068  | -2.635304 |
| H | -1.430503 | 5.035448  | -3.699906 |
| H | -1.264243 | 6.025442  | -2.249119 |
| C | -2.679255 | -2.477929 | -1.020780 |
| C | -1.855491 | -3.231821 | -1.877641 |
| C | -1.626524 | -4.574425 | -1.560686 |
| H | -0.997759 | -5.171151 | -2.221861 |
| C | -2.180236 | -5.156573 | -0.429110 |
| H | -1.989350 | -6.204258 | -0.201864 |
| C | -2.966464 | -4.389351 | 0.421465  |
| H | -3.378513 | -4.837410 | 1.326643  |
| C | -3.227624 | -3.045758 | 0.148531  |
| C | -1.215661 | -2.650267 | -3.120843 |
| H | -1.448192 | -1.576633 | -3.160085 |
| C | 0.304412  | -2.780840 | -3.065500 |
| H | 0.620517  | -3.833379 | -3.061923 |
| H | 0.706840  | -2.293318 | -2.163799 |
| H | 0.761660  | -2.294297 | -3.936033 |
| C | -1.766582 | -3.300794 | -4.389497 |
| H | -1.548322 | -4.377072 | -4.409576 |
| H | -1.312210 | -2.854897 | -5.282546 |
| H | -2.854666 | -3.185968 | -4.475017 |
| C | -4.048601 | -2.236808 | 1.134908  |
| H | -4.214048 | -1.234840 | 0.713144  |
| C | -3.281285 | -2.061280 | 2.445005  |
| H | -3.088693 | -3.031908 | 2.922020  |
| H | -3.854766 | -1.450899 | 3.155285  |
| H | -2.308024 | -1.574085 | 2.283333  |
| C | -5.417144 | -2.860443 | 1.401837  |
| H | -5.993493 | -2.999386 | 0.478984  |
| H | -6.009075 | -2.226164 | 2.073548  |
| H | -5.324184 | -3.844357 | 1.879720  |
| H | 0.887270  | 0.516708  | -2.579411 |
| C | 2.545413  | 0.441486  | -2.261640 |
| C | 3.201668  | 1.679434  | -2.164699 |
| C | 3.232512  | -0.593648 | -2.918105 |
| C | 4.509708  | 1.880742  | -2.618980 |
| H | 2.696185  | 2.519278  | -1.683829 |
| C | 4.530118  | -0.406920 | -3.391830 |
| H | 2.762170  | -1.570036 | -3.035771 |
| C | 5.176601  | 0.816642  | -3.232933 |
| H | 5.050245  | -1.234549 | -3.876417 |
| H | 6.197615  | 0.951628  | -3.591876 |
| C | 5.168284  | 3.219482  | -2.456341 |
| H | 4.908465  | 3.902519  | -3.277262 |
| H | 4.856622  | 3.711714  | -1.525801 |
| H | 6.261652  | 3.137174  | -2.443279 |

TS-1b-toluene\_meta2.log

SCF (wB97x) = -2687.83109158

H(0 K) = -2686.580527

H(298 K) = -2686.515136

G(298 K) = -2686.681284

Lowest Frequency = -783.9150cm<sup>-1</sup>

**S-137**

|    |           |           |           |
|----|-----------|-----------|-----------|
| Pd | 0.883795  | 0.215926  | -0.976861 |
| P  | 1.984430  | 0.148632  | 1.128264  |
| C  | 1.768589  | 1.748301  | 2.052281  |
| H  | 2.406297  | 1.729457  | 2.954291  |
| C  | 0.325440  | 1.994968  | 2.502460  |
| H  | -0.336145 | 1.959287  | 1.617915  |
| H  | -0.014609 | 1.192421  | 3.175258  |
| C  | 0.183404  | 3.349036  | 3.191795  |
| H  | -0.864384 | 3.513727  | 3.483215  |
| H  | 0.770136  | 3.346238  | 4.125653  |
| C  | 0.664046  | 4.483171  | 2.295535  |
| H  | 0.567604  | 5.449408  | 2.810339  |
| H  | 0.012011  | 4.534433  | 1.408458  |
| C  | 2.098141  | 4.249870  | 1.840074  |
| H  | 2.774239  | 4.282502  | 2.711109  |
| H  | 2.425153  | 5.052391  | 1.164669  |
| C  | 2.230338  | 2.899334  | 1.148691  |
| H  | 3.261847  | 2.741951  | 0.801168  |
| H  | 1.603745  | 2.885777  | 0.239395  |
| C  | 3.838840  | 0.060675  | 0.923612  |
| H  | 3.985631  | 0.706302  | 0.037840  |
| C  | 4.746074  | 0.608125  | 2.030432  |
| H  | 4.662806  | -0.012207 | 2.936116  |
| H  | 4.443240  | 1.622805  | 2.323147  |
| C  | 6.199740  | 0.625992  | 1.562328  |
| H  | 6.287755  | 1.320340  | 0.709860  |
| H  | 6.849199  | 1.021353  | 2.355552  |
| C  | 6.663204  | -0.758899 | 1.126798  |
| H  | 6.652235  | -1.433791 | 1.999095  |
| H  | 7.703781  | -0.724136 | 0.776748  |
| C  | 5.751770  | -1.321176 | 0.042797  |
| H  | 6.072118  | -2.331221 | -0.249536 |
| H  | 5.827505  | -0.693825 | -0.859463 |
| C  | 4.297028  | -1.339030 | 0.499379  |
| H  | 3.644913  | -1.722704 | -0.300709 |
| H  | 4.195812  | -2.033449 | 1.350776  |
| C  | 1.453372  | -1.155719 | 2.345230  |
| H  | 0.447358  | -0.803018 | 2.640377  |
| C  | 1.242305  | -2.520790 | 1.674959  |
| H  | 0.572127  | -2.403422 | 0.807529  |
| H  | 2.197443  | -2.896190 | 1.276465  |
| C  | 0.674967  | -3.542033 | 2.656145  |
| H  | 0.581036  | -4.519374 | 2.164181  |
| H  | -0.349398 | -3.242777 | 2.932180  |
| C  | 1.519814  | -3.650526 | 3.919691  |
| H  | 1.077687  | -4.373936 | 4.618306  |
| H  | 2.517208  | -4.042125 | 3.659095  |
| C  | 1.681383  | -2.290054 | 4.586229  |
| H  | 2.296769  | -2.369803 | 5.492843  |
| H  | 0.692908  | -1.924242 | 4.911416  |
| C  | 2.293436  | -1.283681 | 3.617293  |
| H  | 3.306529  | -1.624312 | 3.349324  |
| H  | 2.415805  | -0.303270 | 4.101573  |
| Al | -1.512919 | -0.082260 | -0.730813 |
| N  | -3.026874 | 1.171334  | -0.862754 |
| N  | -2.692059 | -1.591113 | -1.182768 |
| C  | -4.144614 | 0.962978  | -1.571298 |
| C  | -4.488224 | -0.288563 | -2.100082 |

|   |           |           |           |
|---|-----------|-----------|-----------|
| H | -5.407608 | -0.334154 | -2.676034 |
| C | -3.858311 | -1.510654 | -1.829981 |
| C | -5.106369 | 2.094288  | -1.792234 |
| H | -5.421451 | 2.537492  | -0.839241 |
| H | -5.994328 | 1.761082  | -2.335578 |
| H | -4.633860 | 2.904500  | -2.361706 |
| C | -4.560470 | -2.767567 | -2.251606 |
| H | -5.408781 | -2.550151 | -2.905914 |
| H | -4.935230 | -3.314264 | -1.376348 |
| H | -3.876732 | -3.453637 | -2.765465 |
| C | -2.876948 | 2.443267  | -0.207708 |
| C | -3.209818 | 2.532359  | 1.162241  |
| C | -3.140603 | 3.784357  | 1.777542  |
| H | -3.405093 | 3.879639  | 2.828944  |
| C | -2.726980 | 4.911022  | 1.076605  |
| H | -2.678368 | 5.877100  | 1.576788  |
| C | -2.334670 | 4.789222  | -0.248259 |
| H | -1.960905 | 5.662566  | -0.782963 |
| C | -2.392339 | 3.560799  | -0.912827 |
| C | -3.619824 | 1.303210  | 1.954213  |
| H | -3.000077 | 0.464261  | 1.588384  |
| C | -3.348744 | 1.442116  | 3.447845  |
| H | -2.320677 | 1.767169  | 3.648420  |
| H | -3.502967 | 0.482083  | 3.953522  |
| H | -4.028227 | 2.162991  | 3.920892  |
| C | -5.082614 | 0.918066  | 1.724841  |
| H | -5.749448 | 1.746453  | 2.000846  |
| H | -5.354544 | 0.053377  | 2.345600  |
| H | -5.287885 | 0.649773  | 0.682084  |
| C | -1.856997 | 3.459175  | -2.326053 |
| H | -2.124004 | 2.471261  | -2.728321 |
| C | -0.330175 | 3.540949  | -2.286906 |
| H | 0.102035  | 3.412122  | -3.287479 |
| H | 0.086299  | 2.750866  | -1.644467 |
| H | -0.000728 | 4.513904  | -1.892870 |
| C | -2.429347 | 4.521256  | -3.261977 |
| H | -3.526657 | 4.510552  | -3.286884 |
| H | -2.069045 | 4.363554  | -4.285350 |
| H | -2.120336 | 5.531336  | -2.963760 |
| C | -2.238947 | -2.882433 | -0.745579 |
| C | -1.287583 | -3.595309 | -1.498994 |
| C | -0.864229 | -4.839461 | -1.021222 |
| H | -0.134008 | -5.404923 | -1.600620 |
| C | -1.351939 | -5.362956 | 0.167923  |
| H | -1.008611 | -6.333930 | 0.521553  |
| C | -2.269520 | -4.632810 | 0.913005  |
| H | -2.632742 | -5.030330 | 1.861641  |
| C | -2.726500 | -3.387812 | 0.477930  |
| C | -0.709885 | -3.070346 | -2.796433 |
| H | -1.107563 | -2.060256 | -2.968592 |
| C | 0.808943  | -2.948280 | -2.705210 |
| H | 1.286461  | -3.929743 | -2.576376 |
| H | 1.098938  | -2.306955 | -1.858828 |
| H | 1.213183  | -2.493369 | -3.618056 |
| C | -1.110040 | -3.945826 | -3.983579 |
| H | -0.723412 | -4.967625 | -3.870286 |
| H | -0.703471 | -3.540815 | -4.918202 |
| H | -2.199214 | -4.018762 | -4.096595 |
| C | -3.692995 | -2.609284 | 1.350156  |

|   |           |           |           |
|---|-----------|-----------|-----------|
| H | -3.999089 | -1.702255 | 0.809162  |
| C | -3.003979 | -2.163329 | 2.639412  |
| H | -2.676619 | -3.028988 | 3.231272  |
| H | -3.687967 | -1.574095 | 3.264587  |
| H | -2.114459 | -1.549468 | 2.432810  |
| C | -4.955622 | -3.406360 | 1.671931  |
| H | -5.473366 | -3.741150 | 0.764722  |
| H | -5.660284 | -2.800037 | 2.254767  |
| H | -4.725872 | -4.300798 | 2.265465  |
| H | 0.872908  | 0.438264  | -2.585146 |
| C | 2.510201  | 0.655059  | -2.237353 |
| C | 2.979230  | 1.977942  | -2.327450 |
| C | 3.356645  | -0.354117 | -2.722562 |
| C | 4.256513  | 2.257376  | -2.810310 |
| H | 2.351618  | 2.802037  | -1.986398 |
| C | 4.636984  | -0.091603 | -3.222507 |
| H | 3.027719  | -1.394329 | -2.686777 |
| C | 5.089329  | 1.231086  | -3.249446 |
| H | 6.089379  | 1.454342  | -3.623191 |
| H | 4.607487  | 3.289721  | -2.839801 |
| C | 5.500911  | -1.213218 | -3.720793 |
| H | 5.393483  | -1.357379 | -4.805006 |
| H | 6.564866  | -1.025292 | -3.529235 |
| H | 5.238173  | -2.165504 | -3.243293 |

TS-1b-toluene\_ortho1.log

SCF (wB97x) = -2687.83059192

H(0 K)= -2686.579641

H(298 K)= -2686.514302

G(298 K)= -2686.680649

Lowest Frequency = -713.0617cm<sup>-1</sup>

|    |          |           |           |
|----|----------|-----------|-----------|
| Pd | 0.552289 | -0.668344 | -0.299544 |
| P  | 2.441774 | 0.679826  | 0.217347  |
| C  | 2.640835 | 2.300563  | -0.675133 |
| H  | 3.637748 | 2.701100  | -0.418773 |
| C  | 1.607641 | 3.358098  | -0.280973 |
| H  | 0.591745 | 2.975759  | -0.491426 |
| H  | 1.644639 | 3.557907  | 0.799464  |
| C  | 1.847960 | 4.655885  | -1.046822 |
| H  | 1.105641 | 5.409112  | -0.750253 |
| H  | 2.833409 | 5.062524  | -0.763380 |
| C  | 1.814406 | 4.430351  | -2.552680 |
| H  | 2.004187 | 5.369744  | -3.090568 |
| H  | 0.801520 | 4.102820  | -2.838898 |
| C  | 2.816904 | 3.360704  | -2.966665 |
| H  | 3.840440 | 3.724849  | -2.776091 |
| H  | 2.754497 | 3.167184  | -4.046336 |
| C  | 2.594411 | 2.068942  | -2.188709 |
| H  | 3.335858 | 1.314112  | -2.490466 |
| H  | 1.607166 | 1.644477  | -2.441205 |
| C  | 4.013847 | -0.214764 | -0.251913 |
| H  | 3.728336 | -0.662190 | -1.223264 |
| C  | 5.304862 | 0.577734  | -0.478112 |
| H  | 5.646544 | 1.018332  | 0.472170  |
| H  | 5.143127 | 1.418400  | -1.167077 |
| C  | 6.394308 | -0.334489 | -1.040929 |
| H  | 6.079316 | -0.681258 | -2.038951 |

S-140

|    |           |           |           |
|----|-----------|-----------|-----------|
| H  | 7.323335  | 0.233030  | -1.190202 |
| C  | 6.642395  | -1.545607 | -0.148896 |
| H  | 7.059792  | -1.203659 | 0.812997  |
| H  | 7.401118  | -2.201122 | -0.597602 |
| C  | 5.351472  | -2.312659 | 0.113195  |
| H  | 5.532778  | -3.157910 | 0.791262  |
| H  | 4.973486  | -2.746871 | -0.826279 |
| C  | 4.282238  | -1.392832 | 0.689679  |
| H  | 3.354079  | -1.950504 | 0.876173  |
| H  | 4.628097  | -1.003630 | 1.662772  |
| C  | 2.553895  | 1.188685  | 2.001664  |
| H  | 1.743637  | 1.936940  | 2.061757  |
| C  | 2.145708  | 0.065164  | 2.959546  |
| H  | 1.215191  | -0.395756 | 2.596696  |
| H  | 2.906577  | -0.729851 | 2.957564  |
| C  | 1.978263  | 0.596905  | 4.378552  |
| H  | 1.714583  | -0.221060 | 5.063284  |
| H  | 1.131980  | 1.304051  | 4.399181  |
| C  | 3.239586  | 1.307766  | 4.858372  |
| H  | 3.094354  | 1.714760  | 5.868268  |
| H  | 4.058181  | 0.573470  | 4.936200  |
| C  | 3.656887  | 2.412369  | 3.893228  |
| H  | 4.579034  | 2.899488  | 4.238594  |
| H  | 2.878498  | 3.194719  | 3.878416  |
| C  | 3.836068  | 1.871975  | 2.476408  |
| H  | 4.664037  | 1.144165  | 2.467729  |
| H  | 4.128281  | 2.681788  | 1.791259  |
| Al | -1.684492 | 0.049245  | 0.352889  |
| N  | -3.038013 | 1.465158  | 0.207242  |
| N  | -3.098910 | -1.303293 | 0.637070  |
| C  | -4.344709 | 1.388234  | 0.495245  |
| C  | -4.959808 | 0.200133  | 0.898927  |
| H  | -6.016319 | 0.260321  | 1.142159  |
| C  | -4.388028 | -1.079747 | 0.915729  |
| C  | -5.206726 | 2.610125  | 0.363320  |
| H  | -4.864665 | 3.413621  | 1.028260  |
| H  | -6.250617 | 2.387464  | 0.598686  |
| H  | -5.155183 | 3.018167  | -0.653726 |
| C  | -5.293356 | -2.234852 | 1.235510  |
| H  | -6.328566 | -1.905877 | 1.359010  |
| H  | -4.977000 | -2.737023 | 2.158909  |
| H  | -5.255087 | -2.997750 | 0.448576  |
| C  | -2.536438 | 2.700826  | -0.325615 |
| C  | -2.182824 | 3.754059  | 0.541991  |
| C  | -1.697505 | 4.936182  | -0.019435 |
| H  | -1.414195 | 5.760833  | 0.634523  |
| C  | -1.557875 | 5.075593  | -1.395635 |
| H  | -1.176462 | 6.005531  | -1.815554 |
| C  | -1.881578 | 4.016604  | -2.232088 |
| H  | -1.750448 | 4.120782  | -3.309737 |
| C  | -2.370642 | 2.811845  | -1.719516 |
| C  | -2.260986 | 3.599937  | 2.048307  |
| H  | -2.940601 | 2.764921  | 2.270358  |
| C  | -0.886673 | 3.224146  | 2.607163  |
| H  | -0.496479 | 2.312971  | 2.128972  |
| H  | -0.934290 | 3.051703  | 3.690395  |
| H  | -0.159628 | 4.028630  | 2.424552  |
| C  | -2.809959 | 4.838672  | 2.749887  |
| H  | -2.125081 | 5.692056  | 2.667757  |

|   |           |           |           |
|---|-----------|-----------|-----------|
| H | -2.949774 | 4.643062  | 3.819624  |
| H | -3.776172 | 5.152295  | 2.334639  |
| C | -2.682646 | 1.672416  | -2.671219 |
| H | -3.148902 | 0.858862  | -2.094226 |
| C | -1.396639 | 1.121969  | -3.289869 |
| H | -1.616890 | 0.290043  | -3.972601 |
| H | -0.705353 | 0.748751  | -2.516764 |
| H | -0.868957 | 1.896498  | -3.865548 |
| C | -3.678438 | 2.083770  | -3.753638 |
| H | -4.612918 | 2.466544  | -3.325072 |
| H | -3.926565 | 1.227943  | -4.393474 |
| H | -3.267711 | 2.867591  | -4.403279 |
| C | -2.668313 | -2.672536 | 0.526960  |
| C | -2.535891 | -3.229782 | -0.762697 |
| C | -2.110339 | -4.555965 | -0.860175 |
| H | -1.982905 | -5.006244 | -1.842368 |
| C | -1.811431 | -5.303350 | 0.272853  |
| H | -1.471684 | -6.332528 | 0.170392  |
| C | -1.912026 | -4.724247 | 1.529660  |
| H | -1.644893 | -5.304133 | 2.412629  |
| C | -2.334418 | -3.400991 | 1.681937  |
| C | -2.800835 | -2.401397 | -2.008530 |
| H | -2.425969 | -1.383877 | -1.797804 |
| C | -2.026546 | -2.898388 | -3.223441 |
| H | -2.417461 | -3.854209 | -3.596932 |
| H | -0.961202 | -3.033044 | -2.993793 |
| H | -2.110796 | -2.177082 | -4.045936 |
| C | -4.289506 | -2.277381 | -2.332740 |
| H | -4.742336 | -3.265421 | -2.493005 |
| H | -4.433670 | -1.692783 | -3.251506 |
| H | -4.849372 | -1.773639 | -1.535451 |
| C | -2.334560 | -2.753474 | 3.052252  |
| H | -2.978514 | -1.863051 | 3.011642  |
| C | -0.920496 | -2.273090 | 3.383656  |
| H | -0.232657 | -3.124299 | 3.482811  |
| H | -0.899105 | -1.706443 | 4.324148  |
| H | -0.524845 | -1.632079 | 2.582266  |
| C | -2.876857 | -3.659937 | 4.152585  |
| H | -3.874102 | -4.049182 | 3.910485  |
| H | -2.948547 | -3.112835 | 5.100230  |
| H | -2.222534 | -4.522494 | 4.330599  |
| H | -0.278360 | -1.901836 | -0.877907 |
| C | 1.358415  | -2.458503 | -1.091090 |
| C | 1.837515  | -2.556486 | -2.414343 |
| C | 1.548442  | -3.556652 | -0.237776 |
| C | 2.529820  | -3.703719 | -2.818643 |
| C | 2.243968  | -4.693426 | -0.646765 |
| H | 1.137289  | -3.517747 | 0.774338  |
| C | 2.742043  | -4.768631 | -1.945565 |
| H | 3.281366  | -5.653243 | -2.281895 |
| H | 2.907806  | -3.760035 | -3.841919 |
| H | 2.385645  | -5.524151 | 0.045551  |
| C | 1.614581  | -1.428923 | -3.376410 |
| H | 1.962451  | -1.669961 | -4.389220 |
| H | 0.549404  | -1.159631 | -3.432284 |
| H | 2.134041  | -0.516652 | -3.047067 |

TS-1b-toluene\_ortho2.log

SCF (wB97x) = -2687.83377004  
H(0 K)= -2686.582361  
H(298 K)= -2686.517273  
G(298 K)= -2686.681995  
Lowest Frequency = -734.6083cm-1

|    |          |           |           |
|----|----------|-----------|-----------|
| Pd | 0.490130 | -0.626392 | -0.360995 |
| P  | 2.492460 | 0.473669  | 0.297166  |
| C  | 2.847295 | 2.029861  | -0.653739 |
| H  | 3.868062 | 2.361225  | -0.392336 |
| C  | 1.895741 | 3.184244  | -0.333538 |
| H  | 0.857637 | 2.877171  | -0.558958 |
| H  | 1.920359 | 3.427012  | 0.738682  |
| C  | 2.263994 | 4.421020  | -1.147426 |
| H  | 1.584752 | 5.248404  | -0.902130 |
| H  | 3.275461 | 4.753094  | -0.858531 |
| C  | 2.240046 | 4.129822  | -2.642349 |
| H  | 2.521587 | 5.023318  | -3.216974 |
| H  | 1.207442 | 3.879251  | -2.935815 |
| C  | 3.151954 | 2.958742  | -2.987158 |
| H  | 4.200256 | 3.242556  | -2.794220 |
| H  | 3.089448 | 2.721540  | -4.058138 |
| C  | 2.808018 | 1.727828  | -2.156587 |
| H  | 3.481013 | 0.895432  | -2.410019 |
| H  | 1.791047 | 1.378981  | -2.406203 |
| C  | 3.981355 | -0.569782 | -0.131025 |
| H  | 3.677418 | -0.981775 | -1.110693 |
| C  | 5.347035 | 0.094938  | -0.328705 |
| H  | 5.716607 | 0.499322  | 0.626839  |
| H  | 5.279242 | 0.946567  | -1.019461 |
| C  | 6.350436 | -0.919549 | -0.875371 |
| H  | 6.014166 | -1.242322 | -1.874819 |
| H  | 7.331326 | -0.444627 | -1.015693 |
| C  | 6.469560 | -2.141225 | 0.028409  |
| H  | 6.893843 | -1.831032 | 0.998062  |
| H  | 7.175075 | -2.866794 | -0.398557 |
| C  | 5.108492 | -2.786641 | 0.261177  |
| H  | 5.196839 | -3.640854 | 0.946773  |
| H  | 4.718717 | -3.187476 | -0.688259 |
| C  | 4.110821 | -1.772071 | 0.807000  |
| H  | 3.127072 | -2.239084 | 0.954687  |
| H  | 4.450240 | -1.426800 | 1.798938  |
| C  | 2.627080 | 1.019172  | 2.068384  |
| H  | 1.912632 | 1.861547  | 2.094942  |
| C  | 2.070391 | -0.026053 | 3.040306  |
| H  | 1.089953 | -0.367803 | 2.675964  |
| H  | 2.723203 | -0.913100 | 3.056110  |
| C  | 1.961408 | 0.545769  | 4.449642  |
| H  | 1.591321 | -0.220553 | 5.144734  |
| H  | 1.210826 | 1.353791  | 4.450171  |
| C  | 3.296541 | 1.103618  | 4.931869  |
| H  | 3.193985 | 1.539407  | 5.934947  |
| H  | 4.019443 | 0.276679  | 5.026587  |
| C  | 3.850207 | 2.135285  | 3.955269  |
| H  | 4.820777 | 2.515398  | 4.302230  |
| H  | 3.170053 | 3.003633  | 3.920156  |
| C  | 3.976287 | 1.552108  | 2.550156  |
| H  | 4.709662 | 0.729144  | 2.565236  |
| H  | 4.371794 | 2.306881  | 1.853999  |

|    |           |           |           |
|----|-----------|-----------|-----------|
| AI | -1.674322 | 0.154599  | 0.416755  |
| N  | -2.883176 | 1.690567  | 0.193578  |
| N  | -3.211720 | -1.054415 | 0.668574  |
| C  | -4.192117 | 1.742082  | 0.471482  |
| C  | -4.912824 | 0.629711  | 0.919321  |
| H  | -5.956881 | 0.797471  | 1.166028  |
| C  | -4.469310 | -0.699116 | 0.959362  |
| C  | -4.942803 | 3.028648  | 0.283680  |
| H  | -4.551571 | 3.818779  | 0.937364  |
| H  | -6.007709 | 2.902001  | 0.494831  |
| H  | -4.828778 | 3.401755  | -0.741536 |
| C  | -5.480102 | -1.752456 | 1.312919  |
| H  | -6.473579 | -1.318190 | 1.452543  |
| H  | -5.195860 | -2.271366 | 2.237616  |
| H  | -5.537986 | -2.525929 | 0.537535  |
| C  | -2.264951 | 2.857480  | -0.371082 |
| C  | -1.854633 | 3.914692  | 0.467363  |
| C  | -1.269533 | 5.036170  | -0.122293 |
| H  | -0.942278 | 5.861771  | 0.509487  |
| C  | -1.088759 | 5.114791  | -1.498723 |
| H  | -0.634168 | 6.000057  | -1.941630 |
| C  | -1.463481 | 4.048801  | -2.303815 |
| H  | -1.298261 | 4.101014  | -3.380602 |
| C  | -2.046512 | 2.899832  | -1.761630 |
| C  | -1.975141 | 3.821861  | 1.976087  |
| H  | -2.727747 | 3.056503  | 2.212774  |
| C  | -0.649008 | 3.348493  | 2.575423  |
| H  | -0.333952 | 2.389660  | 2.137343  |
| H  | -0.730159 | 3.220664  | 3.662821  |
| H  | 0.148723  | 4.079372  | 2.379297  |
| C  | -2.427139 | 5.126753  | 2.624929  |
| H  | -1.667092 | 5.913038  | 2.534891  |
| H  | -2.608174 | 4.979307  | 3.696197  |
| H  | -3.351690 | 5.511332  | 2.175809  |
| C  | -2.402103 | 1.749201  | -2.683368 |
| H  | -2.872073 | 0.958631  | -2.079307 |
| C  | -1.141987 | 1.158792  | -3.317189 |
| H  | -1.387866 | 0.301936  | -3.958354 |
| H  | -0.441358 | 0.803998  | -2.545139 |
| H  | -0.619958 | 1.902506  | -3.936774 |
| C  | -3.416041 | 2.160428  | -3.748817 |
| H  | -4.344335 | 2.540348  | -3.303865 |
| H  | -3.673554 | 1.305199  | -4.386481 |
| H  | -3.016152 | 2.946885  | -4.402406 |
| C  | -2.937770 | -2.460737 | 0.525792  |
| C  | -2.917592 | -3.005921 | -0.776066 |
| C  | -2.701411 | -4.379808 | -0.906661 |
| H  | -2.676122 | -4.823848 | -1.899817 |
| C  | -2.504411 | -5.188524 | 0.206720  |
| H  | -2.341642 | -6.257600 | 0.080758  |
| C  | -2.478327 | -4.624288 | 1.474552  |
| H  | -2.278303 | -5.254411 | 2.340772  |
| C  | -2.680256 | -3.253899 | 1.658260  |
| C  | -3.126737 | -2.130420 | -1.998810 |
| H  | -2.648787 | -1.161529 | -1.779769 |
| C  | -2.445434 | -2.672490 | -3.249476 |
| H  | -2.923614 | -3.590659 | -3.615489 |
| H  | -1.382956 | -2.884551 | -3.074292 |
| H  | -2.513542 | -1.935754 | -4.059718 |



|   |           |           |           |
|---|-----------|-----------|-----------|
| C | -4.606911 | -1.858527 | -2.271378 |
| H | -5.157409 | -2.796409 | -2.428060 |
| H | -4.724445 | -1.249209 | -3.177280 |
| H | -5.089608 | -1.315789 | -1.449855 |
| C | -2.518415 | -2.638926 | 3.033192  |
| H | -2.992235 | -1.646458 | 3.023284  |
| C | -1.027251 | -2.432847 | 3.311102  |
| H | -0.507883 | -3.399503 | 3.369630  |
| H | -0.866654 | -1.901149 | 4.258561  |
| H | -0.549415 | -1.857255 | 2.504245  |
| C | -3.173590 | -3.451503 | 4.145383  |
| H | -4.233927 | -3.649043 | 3.942153  |
| H | -3.107143 | -2.918027 | 5.101096  |
| H | -2.680609 | -4.421647 | 4.286055  |
| H | -0.362614 | -1.679793 | -1.227793 |
| C | 1.242985  | -2.160276 | -1.591461 |
| C | 1.744552  | -1.892314 | -2.873773 |
| C | 1.456338  | -3.443863 | -1.041829 |
| C | 2.501436  | -2.834016 | -3.572347 |
| C | 2.209219  | -4.381759 | -1.755222 |
| C | 2.742189  | -4.084529 | -3.008476 |
| H | 3.327653  | -4.829769 | -3.545247 |
| H | 2.898082  | -2.590323 | -4.558397 |
| H | 2.379890  | -5.366552 | -1.314589 |
| H | 1.554448  | -0.918312 | -3.330973 |
| C | 0.876906  | -3.788765 | 0.297339  |
| H | 0.954464  | -4.861082 | 0.521393  |
| H | 1.369795  | -3.238387 | 1.114548  |
| H | -0.183068 | -3.500689 | 0.346691  |

TS-1b-toluene\_para.log

SCF (wB97x) = -2687.82728207

H(0 K)= -2686.575796

H(298 K)= -2686.510489

G(298 K)= -2686.676683

Lowest Frequency = -752.6364cm<sup>-1</sup>

|    |          |           |           |
|----|----------|-----------|-----------|
| Pd | 0.623739 | -0.468669 | -0.655038 |
| P  | 2.096001 | 0.711748  | 0.819771  |
| C  | 2.330238 | 2.478367  | 0.289201  |
| H  | 3.156075 | 2.906984  | 0.883926  |
| C  | 1.100518 | 3.361708  | 0.513694  |
| H  | 0.243444 | 2.947890  | -0.049633 |
| H  | 0.803724 | 3.362134  | 1.572890  |
| C  | 1.381643 | 4.791847  | 0.061809  |
| H  | 0.497496 | 5.420452  | 0.233837  |
| H  | 2.188345 | 5.212740  | 0.685552  |
| C  | 1.800771 | 4.842341  | -1.401804 |
| H  | 2.017148 | 5.875408  | -1.708104 |
| H  | 0.955639 | 4.500658  | -2.021540 |
| C  | 3.001245 | 3.940329  | -1.661611 |
| H  | 3.881143 | 4.338268  | -1.128403 |
| H  | 3.261380 | 3.941302  | -2.729250 |
| C  | 2.730820 | 2.516957  | -1.189352 |
| H  | 3.602501 | 1.873604  | -1.380833 |
| H  | 1.904544 | 2.079760  | -1.774675 |
| C  | 3.840718 | 0.045947  | 0.708632  |
| H  | 3.906084 | -0.230500 | -0.359053 |

S-145

|    |           |           |           |
|----|-----------|-----------|-----------|
| C  | 5.017329  | 0.983084  | 0.999018  |
| H  | 5.014307  | 1.283090  | 2.059192  |
| H  | 4.938505  | 1.909799  | 0.414999  |
| C  | 6.338687  | 0.291477  | 0.669435  |
| H  | 6.362199  | 0.075290  | -0.412413 |
| H  | 7.181289  | 0.967450  | 0.870540  |
| C  | 6.497509  | -1.012130 | 1.441623  |
| H  | 6.555893  | -0.787266 | 2.519826  |
| H  | 7.443944  | -1.503534 | 1.177483  |
| C  | 5.319679  | -1.943783 | 1.184060  |
| H  | 5.418546  | -2.865745 | 1.773829  |
| H  | 5.316534  | -2.247069 | 0.125010  |
| C  | 3.994607  | -1.257959 | 1.498375  |
| H  | 3.149929  | -1.930973 | 1.285791  |
| H  | 3.957687  | -1.033821 | 2.577930  |
| C  | 1.640738  | 0.893980  | 2.613318  |
| H  | 0.738859  | 1.527425  | 2.535847  |
| C  | 1.169750  | -0.411053 | 3.263305  |
| H  | 0.456909  | -0.921732 | 2.596490  |
| H  | 2.019456  | -1.098024 | 3.390930  |
| C  | 0.547720  | -0.131691 | 4.628341  |
| H  | 0.229837  | -1.070258 | 5.103295  |
| H  | -0.367073 | 0.469598  | 4.489831  |
| C  | 1.510346  | 0.622992  | 5.539120  |
| H  | 1.036074  | 0.840889  | 6.505665  |
| H  | 2.377773  | -0.020962 | 5.758841  |
| C  | 2.001681  | 1.907560  | 4.882441  |
| H  | 2.714632  | 2.429063  | 5.535681  |
| H  | 1.148489  | 2.593526  | 4.741892  |
| C  | 2.631604  | 1.623385  | 3.521813  |
| H  | 3.527597  | 0.995973  | 3.660974  |
| H  | 2.977494  | 2.558772  | 3.057910  |
| Al | -1.772379 | -0.289434 | -0.304602 |
| N  | -3.178465 | 0.989555  | -0.779379 |
| N  | -3.103306 | -1.742582 | -0.180169 |
| C  | -4.481238 | 0.749449  | -0.988114 |
| C  | -5.058775 | -0.513039 | -0.825920 |
| H  | -6.127364 | -0.583642 | -1.007105 |
| C  | -4.419356 | -1.684266 | -0.395563 |
| C  | -5.384370 | 1.881186  | -1.384392 |
| H  | -5.449518 | 2.628725  | -0.583002 |
| H  | -6.393906 | 1.526303  | -1.607190 |
| H  | -4.993459 | 2.414145  | -2.259662 |
| C  | -5.285689 | -2.882668 | -0.127031 |
| H  | -6.224390 | -2.822291 | -0.685679 |
| H  | -5.541575 | -2.930441 | 0.940664  |
| H  | -4.782366 | -3.823376 | -0.369543 |
| C  | -2.721595 | 2.347156  | -0.895412 |
| C  | -2.817799 | 3.201715  | 0.222473  |
| C  | -2.381293 | 4.520877  | 0.086344  |
| H  | -2.442042 | 5.193724  | 0.942069  |
| C  | -1.862790 | 4.986431  | -1.116303 |
| H  | -1.532994 | 6.020561  | -1.207385 |
| C  | -1.739770 | 4.119630  | -2.193241 |
| H  | -1.307350 | 4.478693  | -3.127877 |
| C  | -2.152069 | 2.787068  | -2.104947 |
| C  | -3.313289 | 2.707872  | 1.569120  |
| H  | -3.819777 | 1.742513  | 1.419366  |
| C  | -2.122451 | 2.457976  | 2.498074  |

|   |           |           |           |
|---|-----------|-----------|-----------|
| H | -1.418172 | 1.736734  | 2.056094  |
| H | -2.451635 | 2.064985  | 3.469198  |
| H | -1.567018 | 3.389218  | 2.680290  |
| C | -4.315778 | 3.657491  | 2.219215  |
| H | -3.854720 | 4.617427  | 2.484164  |
| H | -4.710518 | 3.224278  | 3.146042  |
| H | -5.165251 | 3.872780  | 1.559200  |
| C | -1.951126 | 1.872519  | -3.297020 |
| H | -2.356727 | 0.882140  | -3.043723 |
| C | -0.460519 | 1.696192  | -3.587148 |
| H | -0.302336 | 1.003506  | -4.423848 |
| H | 0.061350  | 1.282239  | -2.710847 |
| H | 0.012338  | 2.654605  | -3.847693 |
| C | -2.694847 | 2.375283  | -4.533126 |
| H | -3.771469 | 2.482833  | -4.350148 |
| H | -2.564806 | 1.681248  | -5.372233 |
| H | -2.317276 | 3.354268  | -4.856491 |
| C | -2.516964 | -2.958557 | 0.309578  |
| C | -1.799096 | -3.775863 | -0.589269 |
| C | -1.128565 | -4.883543 | -0.065566 |
| H | -0.559718 | -5.526568 | -0.734426 |
| C | -1.163189 | -5.172930 | 1.293825  |
| H | -0.625403 | -6.037326 | 1.679771  |
| C | -1.887375 | -4.362417 | 2.157888  |
| H | -1.912590 | -4.596737 | 3.221894  |
| C | -2.580356 | -3.244602 | 1.686213  |
| C | -1.792552 | -3.487681 | -2.079580 |
| H | -1.751851 | -2.393926 | -2.200375 |
| C | -0.580531 | -4.057906 | -2.804443 |
| H | -0.613108 | -5.154761 | -2.857485 |
| H | 0.360895  | -3.762482 | -2.326785 |
| H | -0.554680 | -3.687635 | -3.836040 |
| C | -3.080124 | -3.973968 | -2.748822 |
| H | -3.235168 | -5.047505 | -2.573550 |
| H | -3.029306 | -3.818008 | -3.833702 |
| H | -3.965864 | -3.441578 | -2.384582 |
| C | -3.335095 | -2.353871 | 2.656931  |
| H | -4.025404 | -1.719715 | 2.083484  |
| C | -2.378589 | -1.413982 | 3.387092  |
| H | -1.631731 | -1.981665 | 3.957679  |
| H | -2.918301 | -0.763981 | 4.088953  |
| H | -1.828664 | -0.771833 | 2.683056  |
| C | -4.171984 | -3.154122 | 3.651772  |
| H | -4.835109 | -3.867715 | 3.146738  |
| H | -4.792205 | -2.484452 | 4.259739  |
| H | -3.543267 | -3.726458 | 4.345373  |
| H | 0.361217  | -1.349850 | -1.977000 |
| C | 2.084677  | -1.366517 | -1.863216 |
| C | 2.784746  | -0.672423 | -2.861070 |
| C | 2.618923  | -2.601608 | -1.457257 |
| C | 4.002379  | -1.140722 | -3.356492 |
| H | 2.390034  | 0.272188  | -3.240859 |
| C | 3.830354  | -3.071546 | -1.958061 |
| H | 2.086760  | -3.197645 | -0.711563 |
| C | 4.559463  | -2.339048 | -2.901877 |
| H | 4.536358  | -0.558953 | -4.111247 |
| H | 4.229248  | -4.023116 | -1.598332 |
| C | 5.898834  | -2.812378 | -3.381384 |
| H | 5.904590  | -3.889443 | -3.591034 |

H 6.209583 -2.293283 -4.295529  
H 6.682729 -2.635810 -2.629406

TS-1b\_TS1-PPdAl.log

SCF (wB97x) = -2648.51943408  
H(0 K)= -2647.295750  
H(298 K)= -2647.232494  
G(298 K)= -2647.393313  
Lowest Frequency = -741.9055cm<sup>-1</sup>

|    |           |           |           |
|----|-----------|-----------|-----------|
| Pd | 0.915453  | 0.200714  | -1.097152 |
| P  | 2.146685  | -0.000362 | 0.923043  |
| C  | 2.050181  | 1.561806  | 1.928306  |
| H  | 2.747721  | 1.482118  | 2.781354  |
| C  | 0.650535  | 1.832705  | 2.488942  |
| H  | -0.071187 | 1.854938  | 1.652313  |
| H  | 0.330887  | 1.012625  | 3.150612  |
| C  | 0.600792  | 3.159760  | 3.240841  |
| H  | -0.418912 | 3.344197  | 3.609710  |
| H  | 1.248738  | 3.099259  | 4.131263  |
| C  | 1.057017  | 4.316135  | 2.360487  |
| H  | 1.026793  | 5.262014  | 2.919336  |
| H  | 0.349127  | 4.424456  | 1.522634  |
| C  | 2.448884  | 4.059364  | 1.799283  |
| H  | 3.182257  | 4.032616  | 2.622863  |
| H  | 2.757023  | 4.880323  | 1.137295  |
| C  | 2.488133  | 2.737229  | 1.044535  |
| H  | 3.487518  | 2.563474  | 0.619685  |
| H  | 1.800473  | 2.783873  | 0.181696  |
| C  | 3.978264  | -0.142148 | 0.587580  |
| H  | 4.089088  | 0.537299  | -0.277794 |
| C  | 4.979275  | 0.323622  | 1.649640  |
| H  | 4.935757  | -0.333007 | 2.532263  |
| H  | 4.735219  | 1.334229  | 2.005011  |
| C  | 6.395972  | 0.311792  | 1.079286  |
| H  | 6.449393  | 1.039248  | 0.251917  |
| H  | 7.114290  | 0.649626  | 1.839001  |
| C  | 6.775408  | -1.068026 | 0.555166  |
| H  | 6.801075  | -1.778749 | 1.398274  |
| H  | 7.789508  | -1.053673 | 0.133384  |
| C  | 5.770710  | -1.553933 | -0.482788 |
| H  | 6.030030  | -2.564012 | -0.829304 |
| H  | 5.809903  | -0.898846 | -1.367360 |
| C  | 4.351038  | -1.536416 | 0.072584  |
| H  | 3.631126  | -1.857876 | -0.696157 |
| H  | 4.279240  | -2.264625 | 0.898263  |
| C  | 1.648459  | -1.340057 | 2.115850  |
| H  | 0.677174  | -0.967119 | 2.491595  |
| C  | 1.346064  | -2.666246 | 1.403356  |
| H  | 0.619617  | -2.489520 | 0.593084  |
| H  | 2.257391  | -3.049938 | 0.919809  |
| C  | 0.817654  | -3.716918 | 2.375386  |
| H  | 0.663085  | -4.667445 | 1.847500  |
| H  | -0.177081 | -3.406054 | 2.734112  |
| C  | 1.742161  | -3.905570 | 3.571869  |
| H  | 1.327062  | -4.648831 | 4.266220  |
| H  | 2.708215  | -4.310298 | 3.226875  |
| C  | 1.986981  | -2.581932 | 4.285218  |

S-148

|    |           |           |           |
|----|-----------|-----------|-----------|
| H  | 2.657203  | -2.719159 | 5.144827  |
| H  | 1.032882  | -2.204845 | 4.690587  |
| C  | 2.564982  | -1.549857 | 3.322416  |
| H  | 3.547379  | -1.906210 | 2.973230  |
| H  | 2.748839  | -0.596354 | 3.839874  |
| Al | -1.468263 | -0.016220 | -0.696424 |
| N  | -2.942435 | 1.290895  | -0.667131 |
| N  | -2.727374 | -1.461959 | -1.128827 |
| C  | -4.110768 | 1.151030  | -1.307823 |
| C  | -4.530927 | -0.062444 | -1.869462 |
| H  | -5.486038 | -0.051178 | -2.385877 |
| C  | -3.928229 | -1.315246 | -1.696082 |
| C  | -5.047023 | 2.320022  | -1.411019 |
| H  | -5.288513 | 2.722121  | -0.419044 |
| H  | -5.977165 | 2.041214  | -1.912763 |
| H  | -4.584923 | 3.144738  | -1.968031 |
| C  | -4.694268 | -2.528750 | -2.133179 |
| H  | -5.589406 | -2.254403 | -2.697419 |
| H  | -5.004011 | -3.127263 | -1.266743 |
| H  | -4.071915 | -3.190093 | -2.748014 |
| C  | -2.706342 | 2.526151  | 0.031090  |
| C  | -2.940562 | 2.562800  | 1.423768  |
| C  | -2.790196 | 3.783930  | 2.085193  |
| H  | -2.977986 | 3.839678  | 3.155705  |
| C  | -2.391068 | 4.928848  | 1.405631  |
| H  | -2.278275 | 5.869804  | 1.941976  |
| C  | -2.094302 | 4.855335  | 0.052774  |
| H  | -1.730822 | 5.740754  | -0.468878 |
| C  | -2.236051 | 3.659962  | -0.657718 |
| C  | -3.330412 | 1.311055  | 2.190749  |
| H  | -2.752717 | 0.474779  | 1.755494  |
| C  | -2.966604 | 1.384317  | 3.669302  |
| H  | -1.920430 | 1.676975  | 3.819333  |
| H  | -3.114624 | 0.409045  | 4.146661  |
| H  | -3.598091 | 2.101333  | 4.209876  |
| C  | -4.812681 | 0.964113  | 2.037723  |
| H  | -5.443194 | 1.793340  | 2.386833  |
| H  | -5.064383 | 0.080483  | 2.640177  |
| H  | -5.087633 | 0.741548  | 1.000201  |
| C  | -1.802007 | 3.605952  | -2.107922 |
| H  | -2.134000 | 2.648486  | -2.534786 |
| C  | -0.273861 | 3.630769  | -2.170773 |
| H  | 0.084609  | 3.532722  | -3.203484 |
| H  | 0.153865  | 2.797630  | -1.593427 |
| H  | 0.119156  | 4.572081  | -1.758474 |
| C  | -2.394275 | 4.730842  | -2.953658 |
| H  | -3.490333 | 4.760707  | -2.902694 |
| H  | -2.110558 | 4.608585  | -4.005547 |
| H  | -2.026519 | 5.714033  | -2.633020 |
| C  | -2.296031 | -2.784589 | -0.770953 |
| C  | -1.441282 | -3.511370 | -1.620506 |
| C  | -1.040950 | -4.789338 | -1.218082 |
| H  | -0.384750 | -5.365043 | -1.871344 |
| C  | -1.460053 | -5.333672 | -0.012186 |
| H  | -1.137992 | -6.331883 | 0.280350  |
| C  | -2.278564 | -4.589460 | 0.828212  |
| H  | -2.585015 | -5.004054 | 1.789589  |
| C  | -2.705992 | -3.309162 | 0.472660  |
| C  | -0.937596 | -2.962620 | -2.938742 |

|   |           |           |           |
|---|-----------|-----------|-----------|
| H | -1.324398 | -1.940444 | -3.057466 |
| C | 0.586776  | -2.874083 | -2.940458 |
| H | 1.047904  | -3.868348 | -2.858037 |
| H | 0.943911  | -2.254903 | -2.102915 |
| H | 0.943561  | -2.411775 | -3.869332 |
| C | -1.428630 | -3.796383 | -4.121774 |
| H | -1.050214 | -4.825895 | -4.065914 |
| H | -1.078910 | -3.368050 | -5.068854 |
| H | -2.523807 | -3.852875 | -4.164295 |
| C | -3.561110 | -2.518261 | 1.444373  |
| H | -3.835756 | -1.564540 | 0.970760  |
| C | -2.768019 | -2.189519 | 2.708546  |
| H | -2.459913 | -3.104373 | 3.232809  |
| H | -3.374942 | -1.597698 | 3.406400  |
| H | -1.856293 | -1.617890 | 2.478312  |
| C | -4.854256 | -3.247996 | 1.802602  |
| H | -5.451689 | -3.485720 | 0.913940  |
| H | -5.475376 | -2.635782 | 2.468576  |
| H | -4.650537 | -4.193310 | 2.322375  |
| H | 0.804325  | 0.504562  | -2.688155 |
| C | 2.460742  | 0.643624  | -2.456122 |
| C | 2.966792  | 1.955412  | -2.518104 |
| C | 3.231568  | -0.362374 | -3.064294 |
| C | 4.205397  | 2.235781  | -3.093310 |
| H | 2.392694  | 2.775769  | -2.085055 |
| C | 4.466660  | -0.084186 | -3.649152 |
| H | 2.872907  | -1.392058 | -3.062118 |
| C | 4.968479  | 1.215698  | -3.658857 |
| H | 4.575052  | 3.261876  | -3.100619 |
| H | 5.045114  | -0.895315 | -4.093668 |
| H | 5.934942  | 1.432817  | -4.111222 |

TS-1c\_TS1-PdP2.log

SCF (wB97x) = -2454.34266441

H(0 K)= -2453.270711

H(298 K)= -2453.223513

G(298 K)= -2453.350130

Lowest Frequency = -485.0241cm<sup>-1</sup>

|    |           |           |           |
|----|-----------|-----------|-----------|
| Pd | 0.050976  | 1.118739  | -0.356669 |
| P  | -1.821491 | -0.440433 | -0.005967 |
| P  | 2.220693  | 0.129011  | -0.188140 |
| C  | 2.465242  | -0.581933 | 1.520491  |
| C  | 3.735558  | -1.374513 | 1.853932  |
| C  | 2.216476  | 0.525045  | 2.556269  |
| H  | 1.618216  | -1.290251 | 1.604734  |
| C  | 3.688095  | -1.911881 | 3.282769  |
| H  | 4.625715  | -0.741579 | 1.735238  |
| H  | 3.862440  | -2.209529 | 1.153235  |
| C  | 2.186973  | -0.029787 | 3.975119  |
| H  | 3.014570  | 1.282609  | 2.480905  |
| H  | 1.276608  | 1.050883  | 2.317807  |
| C  | 3.463837  | -0.796215 | 4.295330  |
| H  | 4.611946  | -2.461993 | 3.507008  |
| H  | 2.865574  | -2.641748 | 3.364625  |
| H  | 2.023462  | 0.782115  | 4.696925  |
| H  | 1.325423  | -0.710830 | 4.075138  |
| H  | 3.426535  | -1.202329 | 5.314911  |

S-150

|   |           |           |           |
|---|-----------|-----------|-----------|
| H | 4.320939  | -0.103182 | 4.268362  |
| C | 3.430508  | 1.546172  | -0.363594 |
| C | 4.862038  | 1.434867  | 0.172470  |
| C | 3.405744  | 2.042790  | -1.815850 |
| H | 2.928995  | 2.327252  | 0.233861  |
| C | 5.618548  | 2.748911  | -0.016338 |
| H | 5.410149  | 0.622361  | -0.325999 |
| H | 4.846627  | 1.184350  | 1.241179  |
| C | 4.177543  | 3.346596  | -1.976874 |
| H | 3.846423  | 1.281541  | -2.480350 |
| H | 2.360529  | 2.171541  | -2.134847 |
| C | 5.606862  | 3.208001  | -1.468066 |
| H | 6.648234  | 2.643137  | 0.351395  |
| H | 5.145514  | 3.524576  | 0.607857  |
| H | 4.166965  | 3.663726  | -3.028316 |
| H | 3.663310  | 4.138294  | -1.408502 |
| H | 6.151447  | 4.155481  | -1.576346 |
| H | 6.143267  | 2.469644  | -2.087348 |
| C | 2.753935  | -1.194359 | -1.394688 |
| C | 4.246423  | -1.442796 | -1.642205 |
| C | 2.034449  | -2.510373 | -1.072071 |
| H | 2.329276  | -0.828445 | -2.347528 |
| C | 4.449614  | -2.486965 | -2.738043 |
| H | 4.735471  | -1.781325 | -0.716202 |
| H | 4.748879  | -0.511752 | -1.930605 |
| C | 2.244668  | -3.546095 | -2.170922 |
| H | 2.417244  | -2.917819 | -0.122338 |
| H | 0.964474  | -2.318058 | -0.910610 |
| C | 3.728215  | -3.789356 | -2.418439 |
| H | 5.522231  | -2.665467 | -2.892882 |
| H | 4.063129  | -2.084466 | -3.688715 |
| H | 1.740429  | -4.486305 | -1.910147 |
| H | 1.769900  | -3.188615 | -3.099875 |
| H | 3.870897  | -4.518418 | -3.227065 |
| H | 4.174408  | -4.237647 | -1.515262 |
| C | -2.317333 | 0.007778  | 1.733226  |
| C | -3.786136 | -0.030999 | 2.162501  |
| C | -1.402718 | -0.684961 | 2.750233  |
| H | -2.039631 | 1.073352  | 1.752660  |
| C | -3.941823 | 0.559514  | 3.562647  |
| H | -4.178799 | -1.059863 | 2.151292  |
| H | -4.396540 | 0.547140  | 1.454901  |
| C | -1.585423 | -0.094246 | 4.144051  |
| H | -1.615097 | -1.766054 | 2.785997  |
| H | -0.354615 | -0.587276 | 2.424755  |
| C | -3.046561 | -0.144253 | 4.575023  |
| H | -4.993119 | 0.514258  | 3.877390  |
| H | -3.674806 | 1.628839  | 3.525996  |
| H | -0.949875 | -0.621277 | 4.869301  |
| H | -1.241389 | 0.954036  | 4.135429  |
| H | -3.169337 | 0.299275  | 5.572092  |
| H | -3.359434 | -1.197969 | 4.664611  |
| C | -1.775241 | -2.307455 | -0.053899 |
| C | -2.892365 | -3.101629 | 0.635161  |
| C | -1.593484 | -2.815373 | -1.489933 |
| H | -0.837394 | -2.535429 | 0.489752  |
| C | -2.587256 | -4.597814 | 0.614132  |
| H | -3.848641 | -2.919228 | 0.124365  |
| H | -3.029035 | -2.767231 | 1.670691  |

|   |           |           |           |
|---|-----------|-----------|-----------|
| C | -1.276362 | -4.306334 | -1.506306 |
| H | -2.526063 | -2.643427 | -2.051051 |
| H | -0.815773 | -2.237969 | -2.013136 |
| C | -2.368089 | -5.105797 | -0.805561 |
| H | -3.397098 | -5.155199 | 1.104027  |
| H | -1.678286 | -4.785344 | 1.209616  |
| H | -1.134073 | -4.657372 | -2.537752 |
| H | -0.318219 | -4.472117 | -0.986199 |
| H | -2.120553 | -6.175672 | -0.799043 |
| H | -3.307723 | -5.008536 | -1.373627 |
| C | -3.232203 | 0.120844  | -1.084489 |
| C | -2.760932 | 0.331446  | -2.531326 |
| C | -4.547972 | -0.665238 | -1.098306 |
| H | -3.438236 | 1.127700  | -0.672919 |
| C | -3.810573 | 1.085533  | -3.339171 |
| H | -2.574514 | -0.648447 | -3.000310 |
| H | -1.799327 | 0.863567  | -2.537615 |
| C | -5.611629 | 0.094319  | -1.888393 |
| H | -4.380458 | -1.642623 | -1.580546 |
| H | -4.906927 | -0.881212 | -0.084865 |
| C | -5.153835 | 0.364644  | -3.316939 |
| H | -3.466607 | 1.227926  | -4.373081 |
| H | -3.926836 | 2.091996  | -2.905757 |
| H | -6.557409 | -0.464815 | -1.885593 |
| H | -5.813869 | 1.052144  | -1.381218 |
| H | -5.912444 | 0.943004  | -3.861289 |
| H | -5.057676 | -0.596578 | -3.848685 |
| H | 0.545691  | 2.639093  | -0.453702 |
| C | -1.170450 | 2.814264  | -0.323612 |
| C | -1.602575 | 3.328140  | 0.913677  |
| C | -1.766323 | 3.360804  | -1.473889 |
| C | -2.648061 | 4.246428  | 1.004607  |
| C | -2.806627 | 4.285492  | -1.390654 |
| C | -3.267937 | 4.721432  | -0.149679 |
| H | -1.423960 | 3.043404  | -2.459953 |
| H | -3.259214 | 4.669126  | -2.306069 |
| H | -4.082215 | 5.441343  | -0.083932 |
| H | -2.972752 | 4.599338  | 1.984268  |
| H | -1.116806 | 2.991785  | 1.833017  |

TS-2a\_TS2-PdAl2.log

SCF (wB97x) = -2842.69025423

H(0 K) = -2841.312092

H(298 K) = -2841.234287

G(298 K) = -2841.422495

Lowest Frequency = -74.3857cm<sup>-1</sup>

|    |           |           |           |
|----|-----------|-----------|-----------|
| Pd | -0.085038 | 0.080999  | 0.337046  |
| Al | -2.460189 | -0.448331 | 0.378464  |
| N  | -3.389374 | -1.967299 | -0.464396 |
| N  | -4.176646 | 0.426358  | 0.760759  |
| C  | -4.687828 | -2.270653 | -0.372595 |
| C  | -5.627247 | -1.410173 | 0.211654  |
| H  | -6.654829 | -1.760893 | 0.237066  |
| C  | -5.398996 | -0.112401 | 0.685383  |
| C  | -5.188767 | -3.568233 | -0.938476 |
| H  | -5.149349 | -3.561994 | -2.035644 |
| H  | -6.222128 | -3.760261 | -0.636941 |

S-152



|   |           |           |           |
|---|-----------|-----------|-----------|
| H | -4.559359 | -4.406879 | -0.617714 |
| C | -6.588629 | 0.694075  | 1.117245  |
| H | -6.493793 | 1.007483  | 2.164758  |
| H | -7.517963 | 0.129996  | 1.003096  |
| H | -6.665307 | 1.620082  | 0.533692  |
| C | -2.538565 | -2.822314 | -1.247011 |
| C | -2.557192 | -2.692921 | -2.652813 |
| C | -1.695595 | -3.494842 | -3.400083 |
| H | -1.686158 | -3.400469 | -4.484950 |
| C | -0.828230 | -4.391365 | -2.784360 |
| H | -0.156027 | -5.001327 | -3.387012 |
| C | -0.812724 | -4.493594 | -1.401783 |
| H | -0.125164 | -5.188357 | -0.916509 |
| C | -1.664310 | -3.717132 | -0.607542 |
| C | -3.426488 | -1.649689 | -3.328251 |
| H | -4.326382 | -1.495373 | -2.714243 |
| C | -2.680860 | -0.316417 | -3.383243 |
| H | -2.327680 | 0.001317  | -2.390300 |
| H | -3.324504 | 0.476926  | -3.789104 |
| H | -1.785805 | -0.394094 | -4.013971 |
| C | -3.897532 | -2.057603 | -4.719832 |
| H | -3.067691 | -2.092498 | -5.436969 |
| H | -4.619323 | -1.327877 | -5.105559 |
| H | -4.379520 | -3.043712 | -4.719913 |
| C | -1.623957 | -3.886299 | 0.896283  |
| H | -2.335330 | -3.176001 | 1.342988  |
| C | -0.238361 | -3.566558 | 1.446303  |
| H | -0.219256 | -3.668769 | 2.539068  |
| H | 0.062605  | -2.536073 | 1.193618  |
| H | 0.520990  | -4.245888 | 1.039181  |
| C | -2.060477 | -5.292815 | 1.306313  |
| H | -3.068628 | -5.532305 | 0.944645  |
| H | -2.060653 | -5.398022 | 2.398440  |
| H | -1.377905 | -6.052041 | 0.901572  |
| C | -4.057025 | 1.790042  | 1.201243  |
| C | -3.944643 | 2.075634  | 2.576331  |
| C | -3.832435 | 3.411750  | 2.967962  |
| H | -3.743784 | 3.646085  | 4.029248  |
| C | -3.820843 | 4.439373  | 2.033694  |
| H | -3.736443 | 5.474996  | 2.359467  |
| C | -3.890425 | 4.135966  | 0.680674  |
| H | -3.845095 | 4.938809  | -0.056221 |
| C | -3.998424 | 2.815525  | 0.237229  |
| C | -3.885542 | 0.986032  | 3.628754  |
| H | -4.109983 | 0.026343  | 3.141973  |
| C | -2.471822 | 0.892243  | 4.207912  |
| H | -2.203079 | 1.822641  | 4.727532  |
| H | -1.725034 | 0.721652  | 3.420574  |
| H | -2.399342 | 0.070878  | 4.932948  |
| C | -4.911387 | 1.193369  | 4.741041  |
| H | -4.710528 | 2.111831  | 5.307775  |
| H | -4.882553 | 0.360134  | 5.453741  |
| H | -5.934958 | 1.267237  | 4.351907  |
| C | -3.984324 | 2.531264  | -1.252572 |
| H | -4.186832 | 1.459785  | -1.402251 |
| C | -2.593137 | 2.823129  | -1.817852 |
| H | -2.317956 | 3.875954  | -1.659855 |
| H | -2.547061 | 2.619431  | -2.895534 |
| H | -1.826787 | 2.202921  | -1.330282 |

|    |           |           |           |
|----|-----------|-----------|-----------|
| C  | -5.058174 | 3.309488  | -2.008577 |
| H  | -6.063041 | 3.111426  | -1.615199 |
| H  | -5.052366 | 3.037148  | -3.071463 |
| H  | -4.889315 | 4.392799  | -1.950378 |
| Al | 2.192418  | 0.492061  | 0.703911  |
| N  | 3.284602  | 2.023713  | 0.347302  |
| N  | 3.634337  | -0.596971 | 1.356705  |
| C  | 4.467331  | 2.241973  | 0.932906  |
| C  | 5.135469  | 1.263991  | 1.679880  |
| H  | 6.082022  | 1.560014  | 2.121734  |
| C  | 4.787974  | -0.089137 | 1.808738  |
| C  | 5.143102  | 3.568069  | 0.751977  |
| H  | 4.433119  | 4.395379  | 0.866050  |
| H  | 5.560554  | 3.658752  | -0.259502 |
| H  | 5.961793  | 3.693316  | 1.465546  |
| C  | 5.784039  | -0.993409 | 2.472577  |
| H  | 5.400922  | -1.362808 | 3.431544  |
| H  | 6.727378  | -0.473401 | 2.657081  |
| H  | 5.980891  | -1.881833 | 1.860714  |
| C  | 2.786969  | 2.973242  | -0.609531 |
| C  | 3.345602  | 2.986474  | -1.904953 |
| C  | 2.781479  | 3.843419  | -2.851057 |
| H  | 3.182148  | 3.850606  | -3.864785 |
| C  | 1.708534  | 4.667534  | -2.532118 |
| H  | 1.280561  | 5.323572  | -3.288528 |
| C  | 1.186688  | 4.652129  | -1.245743 |
| H  | 0.351358  | 5.305307  | -0.991339 |
| C  | 1.708721  | 3.807746  | -0.260951 |
| C  | 4.493038  | 2.077433  | -2.311096 |
| H  | 4.937443  | 1.642741  | -1.404640 |
| C  | 3.995541  | 0.914677  | -3.168791 |
| H  | 3.528599  | 1.279512  | -4.092351 |
| H  | 3.236090  | 0.314601  | -2.649537 |
| H  | 4.829650  | 0.256903  | -3.448511 |
| C  | 5.599167  | 2.840189  | -3.038861 |
| H  | 6.459252  | 2.185103  | -3.223499 |
| H  | 5.951764  | 3.708546  | -2.467192 |
| H  | 5.260414  | 3.209712  | -4.015073 |
| C  | 1.126210  | 3.851748  | 1.138166  |
| H  | 1.607567  | 3.068696  | 1.740600  |
| C  | 1.426963  | 5.195229  | 1.804204  |
| H  | 2.504326  | 5.400149  | 1.851705  |
| H  | 1.034635  | 5.217233  | 2.828400  |
| H  | 0.959996  | 6.022069  | 1.252127  |
| C  | -0.373218 | 3.570539  | 1.140676  |
| H  | -0.766852 | 3.555696  | 2.165499  |
| H  | -0.597825 | 2.590413  | 0.688599  |
| H  | -0.931661 | 4.337252  | 0.586037  |
| C  | 3.410311  | -2.011145 | 1.500234  |
| C  | 3.005976  | -2.536222 | 2.743439  |
| C  | 2.872099  | -3.922838 | 2.856220  |
| H  | 2.560446  | -4.347986 | 3.810665  |
| C  | 3.113484  | -4.760439 | 1.776944  |
| H  | 3.009798  | -5.838776 | 1.888281  |
| C  | 3.453969  | -4.218138 | 0.542590  |
| H  | 3.606774  | -4.879206 | -0.308426 |
| C  | 3.600988  | -2.839420 | 0.372968  |
| C  | 2.675821  | -1.659122 | 3.937159  |
| H  | 2.987365  | -0.630012 | 3.708496  |

|   |          |           |           |
|---|----------|-----------|-----------|
| C | 1.165858 | -1.634185 | 4.183459  |
| H | 0.803193 | -2.634846 | 4.458117  |
| H | 0.613795 | -1.301577 | 3.295704  |
| H | 0.921374 | -0.951320 | 5.007506  |
| C | 3.397799 | -2.102406 | 5.209638  |
| H | 3.204773 | -1.395445 | 6.025388  |
| H | 4.484852 | -2.174974 | 5.078781  |
| H | 3.046785 | -3.086477 | 5.546258  |
| C | 3.972537 | -2.252899 | -0.977375 |
| H | 3.361996 | -1.342952 | -1.116774 |
| C | 3.654637 | -3.177247 | -2.147384 |
| H | 4.353182 | -4.024078 | -2.196112 |
| H | 3.741444 | -2.623506 | -3.089818 |
| H | 2.635371 | -3.579560 | -2.093078 |
| C | 5.444444 | -1.836448 | -1.044949 |
| H | 6.100397 | -2.686987 | -0.812420 |
| H | 5.686803 | -1.020880 | -0.354490 |
| H | 5.695899 | -1.491369 | -2.055711 |
| H | 0.983334 | 0.605557  | 1.910653  |
| C | 0.623766 | 0.002313  | -1.644773 |
| C | 0.859064 | -1.226486 | -2.292507 |
| C | 0.548931 | 1.136254  | -2.481022 |
| C | 0.988736 | -1.323738 | -3.679160 |
| H | 0.912050 | -2.140310 | -1.695118 |
| C | 0.657404 | 1.046038  | -3.868132 |
| H | 0.388422 | 2.121169  | -2.038416 |
| C | 0.886777 | -0.186379 | -4.479794 |
| H | 1.160926 | -2.300869 | -4.135588 |
| H | 0.579885 | 1.952555  | -4.472593 |
| H | 0.989052 | -0.259068 | -5.562480 |

TS-2b\_TS2-PPdAl.log

SCF (wB97x) = -2648.53480595

H(0 K)= -2647.311421

H(298 K)= -2647.248681

G(298 K)= -2647.407463

Lowest Frequency = -45.0644cm<sup>-1</sup>

|    |          |           |           |
|----|----------|-----------|-----------|
| Pd | 0.563176 | -0.373011 | -0.199580 |
| P  | 2.944433 | -0.415156 | -0.172449 |
| C  | 3.824339 | -1.020376 | -1.700753 |
| H  | 4.916832 | -0.960803 | -1.547451 |
| C  | 3.458964 | -0.173750 | -2.923436 |
| H  | 2.358090 | -0.149442 | -3.014554 |
| H  | 3.777706 | 0.869124  | -2.783347 |
| C  | 4.070230 | -0.726764 | -4.206674 |
| H  | 3.771649 | -0.104704 | -5.061722 |
| H  | 5.169011 | -0.659834 | -4.145118 |
| C  | 3.670551 | -2.178701 | -4.433486 |
| H  | 4.134162 | -2.570129 | -5.349160 |
| H  | 2.580531 | -2.231738 | -4.588314 |
| C  | 4.045997 | -3.035796 | -3.231629 |
| H  | 5.144021 | -3.062106 | -3.132912 |
| H  | 3.724978 | -4.075844 | -3.381775 |
| C  | 3.437639 | -2.484001 | -1.947383 |
| H  | 3.725651 | -3.113402 | -1.093276 |
| H  | 2.337734 | -2.539495 | -2.008428 |
| C  | 3.654536 | -1.511159 | 1.164060  |

S-155

|    |           |           |           |
|----|-----------|-----------|-----------|
| H  | 3.048092  | -2.428354 | 1.040773  |
| C  | 5.126478  | -1.930959 | 1.084692  |
| H  | 5.774894  | -1.055520 | 1.238399  |
| H  | 5.376527  | -2.327120 | 0.090827  |
| C  | 5.437059  | -2.979688 | 2.151075  |
| H  | 4.850146  | -3.888231 | 1.936729  |
| H  | 6.493983  | -3.275184 | 2.095820  |
| C  | 5.092042  | -2.478912 | 3.549298  |
| H  | 5.752699  | -1.631952 | 3.798967  |
| H  | 5.295352  | -3.258028 | 4.296629  |
| C  | 3.641158  | -2.018415 | 3.629382  |
| H  | 3.413799  | -1.618189 | 4.626725  |
| H  | 2.969266  | -2.879842 | 3.484603  |
| C  | 3.331954  | -0.974419 | 2.562752  |
| H  | 2.280240  | -0.665461 | 2.620204  |
| H  | 3.940280  | -0.073683 | 2.754059  |
| C  | 3.610816  | 1.311674  | 0.049580  |
| H  | 3.475198  | 1.747766  | -0.956521 |
| C  | 2.731992  | 2.146761  | 0.991081  |
| H  | 1.677272  | 2.067915  | 0.678068  |
| H  | 2.774781  | 1.730469  | 2.010314  |
| C  | 3.180489  | 3.603843  | 1.013723  |
| H  | 2.561307  | 4.177032  | 1.717292  |
| H  | 3.001687  | 4.046837  | 0.018672  |
| C  | 4.658840  | 3.736482  | 1.360315  |
| H  | 4.966562  | 4.791003  | 1.347545  |
| H  | 4.823052  | 3.378635  | 2.390150  |
| C  | 5.520194  | 2.916483  | 0.407105  |
| H  | 6.583027  | 3.002567  | 0.671751  |
| H  | 5.420060  | 3.322560  | -0.613228 |
| C  | 5.091895  | 1.451816  | 0.405523  |
| H  | 5.266385  | 1.031133  | 1.408595  |
| H  | 5.715159  | 0.867701  | -0.288160 |
| Al | -1.601794 | 0.184466  | -0.777143 |
| N  | -3.229676 | -0.751659 | -1.081425 |
| N  | -2.372473 | 1.925255  | -0.915897 |
| C  | -4.262419 | -0.218590 | -1.743925 |
| C  | -4.321404 | 1.140115  | -2.088251 |
| H  | -5.181330 | 1.451564  | -2.673486 |
| C  | -3.480494 | 2.165516  | -1.624452 |
| C  | -5.425488 | -1.091695 | -2.103124 |
| H  | -6.004078 | -1.351333 | -1.206949 |
| H  | -5.089440 | -2.041809 | -2.534978 |
| H  | -6.096709 | -0.591780 | -2.806097 |
| C  | -3.871802 | 3.583090  | -1.913525 |
| H  | -3.103685 | 4.080095  | -2.519229 |
| H  | -3.951902 | 4.165103  | -0.987256 |
| H  | -4.824397 | 3.635196  | -2.446509 |
| C  | -3.320854 | -2.082153 | -0.542414 |
| C  | -2.641045 | -3.136341 | -1.180855 |
| C  | -2.684012 | -4.402412 | -0.590320 |
| H  | -2.163788 | -5.228842 | -1.075383 |
| C  | -3.367913 | -4.621205 | 0.597798  |
| H  | -3.385095 | -5.613703 | 1.044858  |
| C  | -4.022493 | -3.564934 | 1.218445  |
| H  | -4.540450 | -3.731563 | 2.163273  |
| C  | -4.013081 | -2.281337 | 0.669781  |
| C  | -1.868106 | -2.947328 | -2.470593 |
| H  | -1.950565 | -1.893603 | -2.773261 |

|   |           |           |           |
|---|-----------|-----------|-----------|
| C | -0.384047 | -3.247166 | -2.268933 |
| H | 0.042968  | -2.612633 | -1.475691 |
| H | 0.179211  | -3.050506 | -3.191185 |
| H | -0.220137 | -4.297834 | -1.991704 |
| C | -2.447921 | -3.798976 | -3.599349 |
| H | -2.371534 | -4.870000 | -3.369678 |
| H | -1.904294 | -3.624082 | -4.535810 |
| H | -3.507553 | -3.577432 | -3.778309 |
| C | -4.687247 | -1.151598 | 1.424945  |
| H | -4.647219 | -0.242315 | 0.807019  |
| C | -3.935169 | -0.859007 | 2.723341  |
| H | -4.400896 | -0.021016 | 3.260070  |
| H | -2.880994 | -0.613534 | 2.541710  |
| H | -3.948534 | -1.730218 | 3.391500  |
| C | -6.157222 | -1.447471 | 1.718584  |
| H | -6.727016 | -1.682966 | 0.810663  |
| H | -6.634340 | -0.584477 | 2.199931  |
| H | -6.264889 | -2.301009 | 2.400434  |
| C | -1.649382 | 3.015467  | -0.317183 |
| C | -1.892107 | 3.308618  | 1.044418  |
| C | -1.193410 | 4.374218  | 1.616139  |
| H | -1.366340 | 4.627025  | 2.659842  |
| C | -0.267892 | 5.109410  | 0.883486  |
| H | 0.265188  | 5.935666  | 1.351394  |
| C | -0.002914 | 4.766141  | -0.433176 |
| H | 0.754576  | 5.315164  | -0.993593 |
| C | -0.677383 | 3.712871  | -1.058180 |
| C | -2.847770 | 2.468392  | 1.876193  |
| H | -2.644564 | 1.411995  | 1.622039  |
| C | -2.622952 | 2.615851  | 3.376990  |
| H | -2.971854 | 3.591268  | 3.742844  |
| H | -1.568513 | 2.506358  | 3.650799  |
| H | -3.184259 | 1.844630  | 3.917096  |
| C | -4.322277 | 2.742235  | 1.566921  |
| H | -4.561464 | 3.803760  | 1.720127  |
| H | -4.963640 | 2.160038  | 2.242397  |
| H | -4.605083 | 2.473219  | 0.543877  |
| C | -0.288619 | 3.332665  | -2.473117 |
| H | -0.950319 | 2.521888  | -2.810784 |
| C | 1.142908  | 2.793997  | -2.497153 |
| H | 1.859916  | 3.569386  | -2.188978 |
| H | 1.418660  | 2.463037  | -3.507143 |
| H | 1.253500  | 1.933960  | -1.820945 |
| C | -0.426356 | 4.501230  | -3.448558 |
| H | -1.437695 | 4.926845  | -3.455480 |
| H | -0.190738 | 4.180812  | -4.470566 |
| H | 0.265300  | 5.315185  | -3.194813 |
| C | -0.200107 | -0.773494 | 1.700296  |
| C | -0.522243 | -2.105093 | 2.036372  |
| C | -0.213584 | 0.155632  | 2.758874  |
| C | -0.774343 | -2.495583 | 3.351710  |
| H | -0.567039 | -2.862860 | 1.248921  |
| C | -0.470822 | -0.226101 | 4.077412  |
| H | 0.013021  | 1.205252  | 2.549428  |
| C | -0.745455 | -1.558014 | 4.383960  |
| H | -1.008581 | -3.539501 | 3.568904  |
| H | -0.457590 | 0.523300  | 4.871294  |
| H | -0.946358 | -1.859117 | 5.411480  |
| H | -0.282303 | 0.003921  | -1.909422 |

MesAlH2.log

SCF (wB97x) = -1006.60804023

H(0 K)= -1006.126309

H(298 K)= -1006.097358

G(298 K)= -1006.185227

Lowest Frequency = 15.8994cm<sup>-1</sup>

|    |           |           |           |
|----|-----------|-----------|-----------|
| N  | 1.421984  | 0.497184  | 0.163916  |
| C  | 1.257695  | 1.611641  | 0.878165  |
| Al | -0.000029 | -0.564356 | -0.629308 |
| H  | 0.000030  | -2.015214 | -0.024845 |
| H  | -0.000088 | -0.410290 | -2.194890 |
| N  | -1.421996 | 0.497164  | 0.163998  |
| C  | 0.000012  | 2.150549  | 1.188362  |
| H  | 0.000025  | 3.068983  | 1.767416  |
| C  | -1.257682 | 1.611627  | 0.878244  |
| C  | 2.472539  | 2.326290  | 1.396465  |
| H  | 3.154054  | 2.593830  | 0.579506  |
| H  | 3.049839  | 1.680732  | 2.070467  |
| H  | 2.201006  | 3.236264  | 1.937303  |
| C  | -2.472500 | 2.326287  | 1.396593  |
| H  | -3.153871 | 2.594136  | 0.579614  |
| H  | -2.200916 | 3.236097  | 1.937684  |
| H  | -3.049977 | 1.680641  | 2.070352  |
| C  | 2.742344  | -0.016103 | -0.048368 |
| C  | 3.453778  | 0.354208  | -1.200041 |
| C  | 4.716364  | -0.204353 | -1.407043 |
| H  | 5.276397  | 0.082376  | -2.298984 |
| C  | 5.277713  | -1.115727 | -0.512380 |
| C  | 4.542886  | -1.461794 | 0.623581  |
| H  | 4.964911  | -2.170871 | 1.338249  |
| C  | 3.277790  | -0.930981 | 0.873992  |
| C  | -2.742357 | -0.016111 | -0.048310 |
| C  | -3.453798 | 0.354289  | -1.199947 |
| C  | -4.716376 | -0.204277 | -1.406994 |
| H  | -5.276413 | 0.082506  | -2.298915 |
| C  | -5.277714 | -1.115732 | -0.512410 |
| C  | -4.542857 | -1.461927 | 0.623495  |
| H  | -4.964844 | -2.171102 | 1.338088  |
| C  | -3.277767 | -0.931115 | 0.873947  |
| C  | 6.620909  | -1.727909 | -0.773891 |
| H  | 7.198685  | -1.852062 | 0.149629  |
| H  | 6.526410  | -2.725655 | -1.223695 |
| H  | 7.216346  | -1.120169 | -1.464282 |
| C  | -6.620961 | -1.727808 | -0.773914 |
| H  | -6.526568 | -2.725753 | -1.223292 |
| H  | -7.198938 | -1.851458 | 0.149551  |
| H  | -7.216176 | -1.120219 | -1.464633 |
| C  | -2.500592 | -1.314160 | 2.096273  |
| H  | -2.287830 | -0.448030 | 2.738756  |
| H  | -3.044999 | -2.048966 | 2.698554  |
| H  | -1.525507 | -1.744416 | 1.830450  |
| C  | -2.870181 | 1.334471  | -2.171225 |
| H  | -2.684221 | 2.312923  | -1.706456 |
| H  | -1.900995 | 0.991033  | -2.556087 |
| H  | -3.539241 | 1.493421  | -3.023372 |
| C  | 2.870157  | 1.334331  | -2.171375 |
| H  | 1.901024  | 0.990818  | -2.556301 |

|   |          |           |           |
|---|----------|-----------|-----------|
| H | 2.684091 | 2.312772  | -1.706627 |
| H | 3.539262 | 1.493317  | -3.023480 |
| C | 2.500657 | -1.313871 | 2.096393  |
| H | 1.525556 | -1.744144 | 1.830664  |
| H | 3.045081 | -2.048608 | 2.698743  |
| H | 2.287940 | -0.447656 | 2.738778  |

MesAlHPh.log

SCF (wB97x) = -1237.63036884

H(0 K)= -1237.065596

H(298 K)= -1237.031345

G(298 K)= -1237.132960

Lowest Frequency = 15.5419cm<sup>-1</sup>

|    |           |           |           |
|----|-----------|-----------|-----------|
| N  | 1.523546  | -1.199235 | 0.197296  |
| C  | 1.417944  | -2.432764 | -0.316650 |
| Al | 0.030581  | -0.332290 | 1.084876  |
| H  | -0.072141 | -0.778812 | 2.588262  |
| N  | -1.317498 | -1.306325 | 0.063799  |
| C  | 0.194168  | -3.076587 | -0.539975 |
| H  | 0.248494  | -4.084955 | -0.939268 |
| C  | -1.087458 | -2.500484 | -0.477537 |
| C  | 2.668083  | -3.162436 | -0.718593 |
| H  | 3.415768  | -3.135996 | 0.083428  |
| H  | 3.142073  | -2.694234 | -1.590387 |
| H  | 2.453111  | -4.204346 | -0.969527 |
| C  | -2.223567 | -3.254328 | -1.105618 |
| H  | -3.080402 | -3.334155 | -0.426300 |
| H  | -1.916620 | -4.258446 | -1.409163 |
| H  | -2.590347 | -2.725178 | -1.994815 |
| C  | 2.786347  | -0.532090 | 0.099971  |
| C  | 3.620302  | -0.429263 | 1.221649  |
| C  | 4.822449  | 0.271995  | 1.093031  |
| H  | 5.476257  | 0.352943  | 1.963172  |
| C  | 5.209920  | 0.865404  | -0.106889 |
| C  | 4.352414  | 0.749950  | -1.205002 |
| H  | 4.626601  | 1.221913  | -2.150455 |
| C  | 3.142642  | 0.063709  | -1.124423 |
| C  | -2.621418 | -0.722906 | -0.044706 |
| C  | -3.556480 | -0.923026 | 0.981610  |
| C  | -4.788904 | -0.271419 | 0.892393  |
| H  | -5.519911 | -0.422055 | 1.688796  |
| C  | -5.107115 | 0.565378  | -0.176767 |
| C  | -4.153689 | 0.739228  | -1.182670 |
| H  | -4.378307 | 1.396032  | -2.025151 |
| C  | -2.909243 | 0.113184  | -1.136730 |
| C  | 6.509939  | 1.602351  | -0.224449 |
| H  | 7.219550  | 1.069865  | -0.871731 |
| H  | 6.373503  | 2.598693  | -0.662894 |
| H  | 6.991009  | 1.731272  | 0.751044  |
| C  | -6.430462 | 1.266561  | -0.245870 |
| H  | -6.311283 | 2.357604  | -0.220795 |
| H  | -6.966674 | 1.032325  | -1.174389 |
| H  | -7.079803 | 0.987658  | 0.591033  |
| C  | -1.880999 | 0.368621  | -2.194895 |
| H  | -1.398456 | -0.553103 | -2.546776 |
| H  | -2.319564 | 0.876679  | -3.060293 |
| H  | -1.078064 | 1.010990  | -1.802797 |

S-159

|   |           |           |           |
|---|-----------|-----------|-----------|
| C | -3.232964 | -1.807346 | 2.147645  |
| H | -4.062346 | -1.838725 | 2.861901  |
| H | -3.021801 | -2.840151 | 1.836875  |
| H | -2.335382 | -1.466842 | 2.680973  |
| C | 3.233926  | -1.061214 | 2.524235  |
| H | 2.377587  | -0.555908 | 2.990859  |
| H | 2.927811  | -2.107715 | 2.397231  |
| H | 4.063238  | -1.031725 | 3.238762  |
| C | 2.199899  | 0.016071  | -2.288355 |
| H | 2.610801  | 0.546125  | -3.153960 |
| H | 1.960929  | -1.008773 | -2.604684 |
| H | 1.239273  | 0.484085  | -2.028101 |
| C | -0.152027 | 1.603044  | 0.691288  |
| C | 0.807317  | 2.427992  | 0.075611  |
| C | -1.385064 | 2.213478  | 0.997417  |
| H | 1.794139  | 2.027763  | -0.165718 |
| H | -2.171542 | 1.632903  | 1.488812  |
| C | 0.548370  | 3.761010  | -0.241340 |
| C | -1.662984 | 3.540427  | 0.676081  |
| H | 1.318562  | 4.366428  | -0.719396 |
| H | -2.637245 | 3.966821  | 0.915852  |
| C | -0.693946 | 4.319149  | 0.048699  |
| H | -0.903119 | 5.357581  | -0.206425 |
